# Supplementary material for: Salt-Responsive Transcriptome Profiling of Suaeda glauca via RNA Sequencing
Source: PLoS One. 2016 Mar 1;11(3):e0150504. doi: 10.1371/journal.pone.0150504 (PMC4773115; doi:10.1371/journal.pone.0150504)
Supplement: S1 Table — (XLSX) [file pone.0150504.s001.xlsx]

## Sheet: Integrated_Function.anno
#GeneID	COG_class	COG_class_annotation	GO_annotation	KEGG_annotation	KOG_class	KOG_class_annotation	Pfam_annotation	Swissprot_annotation	nr_annotation
c39890.graph_c0	[R]	General function prediction only	Biological Process: cellular process (GO:0009987);; Cellular Component: intracellular membrane-bounded organelle (GO:0043231);; Cellular Component: cytoplasmic part (GO:0044444);;	K08869|0.0|rcu:RCOM_0205150|Ubiquinone biosynthesis protein coq-8, putative	[R]	General function prediction only	Beta-lactamase;; ABC1 family;; Lipopolysaccharide core biosynthesis protein (WaaY);; Helix-loop-helix DNA-binding domain	Transcription factor bHLH130 GN=T24P15.19 OS=Arabidopsis thaliana (Mouse-ear cress) PE=1 SV=1	PREDICTED: uncharacterized protein LOC104886700 isoform X2 [Beta vulgaris subsp. vulgaris]
c31267.graph_c0	--	--	Molecular Function: nucleotide binding (GO:0000166);; Molecular Function: 3-beta-hydroxy-delta5-steroid dehydrogenase activity (GO:0003854);; Cellular Component: cytosol (GO:0005829);; Biological Process: steroid metabolic process (GO:0008202);; Biological Process: response to wounding (GO:0009611);; Biological Process: xylem and phloem pattern formation (GO:0010051);; Molecular Function: enone r…	--	--	--	--	3-oxo-Delta(4,5)-steroid 5-beta-reductase GN=T22A6.50 OS=Arabidopsis thaliana (Mouse-ear cress) PE=1 SV=1	PREDICTED: 3-oxo-Delta(4,5)-steroid 5-beta-reductase [Beta vulgaris subsp. vulgaris]
c34323.graph_c0	[O]	Posttranslational modification, protein turnover, chaperones	--	--	[O]	Posttranslational modification, protein turnover, chaperones	ATPase family associated with various cellular activities (AAA);; Domain associated at C-terminal with AAA	26S protease regulatory subunit 10B homolog A GN=RPT4A OS=Arabidopsis thaliana (Mouse-ear cress) PE=1 SV=1	PREDICTED: probable mitochondrial chaperone BCS1-B [Beta vulgaris subsp. vulgaris]
c11316.graph_c0	--	--	--	--	--	--	No apical meristem (NAM) protein	NAC domain-containing protein 86 {ECO:0000312|EMBL:AED92405.1} OS=Arabidopsis thaliana (Mouse-ear cress) PE=2 SV=1	PREDICTED: uncharacterized protein LOC104888129 isoform X1 [Beta vulgaris subsp. vulgaris]
c54204.graph_c0	--	--	--	--	--	--	--	--	PREDICTED: NAC domain-containing protein 21/22-like isoform X3 [Beta vulgaris subsp. vulgaris]
c51666.graph_c0	--	--	--	--	[D]	Cell cycle control, cell division, chromosome partitioning	--	--	PREDICTED: uncharacterized protein LOC104885311 [Beta vulgaris subsp. vulgaris]
c17825.graph_c0	--	--	--	K04508|9e-17|pop:POPTR_860093|hypothetical protein	[B]	Chromatin structure and dynamics	--	--	hypothetical protein POPTR_0005s18790g [Populus trichocarpa]
c18170.graph_c0	[I]	Lipid transport and metabolism	Biological Process: unsaturated fatty acid biosynthetic process (GO:0006636);; Biological Process: photoinhibition (GO:0010205);; Cellular Component: chloroplast membrane (GO:0031969);; Molecular Function: omega-6 fatty acid desaturase activity (GO:0045485);;	K10255|0.0|pop:POPTR_802185|omega-6 fatty acid desaturase	--	--	Fatty acid desaturase	Omega-6 fatty acid desaturase, chloroplastic (Precursor) GN=FAD6 OS=Spinacia oleracea (Spinach) PE=1 SV=1	PREDICTED: omega-6 fatty acid desaturase, chloroplastic [Beta vulgaris subsp. vulgaris]
c11436.graph_c0	--	--	--	--	--	--	CCT motif	Zinc finger protein CONSTANS-LIKE 10 GN=COL10 OS=Arabidopsis thaliana (Mouse-ear cress) PE=1 SV=1	PREDICTED: zinc finger protein CONSTANS-LIKE 10 [Beta vulgaris subsp. vulgaris]
c35144.graph_c0	--	--	Molecular Function: nucleic acid binding (GO:0003676);;	--	--	--	--	--	PREDICTED: uncharacterized protein LOC104901309 [Beta vulgaris subsp. vulgaris]
c44399.graph_c0	--	--	--	--	--	--	--	--	PREDICTED: AF4/FMR2 family member 4 [Beta vulgaris subsp. vulgaris]
c29214.graph_c0	--	--	Cellular Component: plastid (GO:0009536);;	--	--	--	FAR1 DNA-binding domain	Protein FAR1-RELATED SEQUENCE 12 GN=FRS12 OS=Arabidopsis thaliana (Mouse-ear cress) PE=2 SV=1	PREDICTED: protein FAR1-RELATED SEQUENCE 5-like [Beta vulgaris subsp. vulgaris]
c1275.graph_c0	--	--	--	--	--	--	--	--	PREDICTED: uncharacterized protein LOC104883424 [Beta vulgaris subsp. vulgaris]
c39361.graph_c0	[GEPR]	--	--	--	[S]	Function unknown	Ion channel regulatory protein UNC-93	UNC93-like protein 3 GN=At3g09470 OS=Arabidopsis thaliana (Mouse-ear cress) PE=2 SV=1	PREDICTED: UNC93-like protein 3 isoform X1 [Beta vulgaris subsp. vulgaris]
c14926.graph_c0	--	--	--	--	--	--	--	--	PREDICTED: uncharacterized protein LOC104903557 [Beta vulgaris subsp. vulgaris]
c27385.graph_c0	[J]	Translation, ribosomal structure and biogenesis	--	K03243|1e-65|vvi:100242745|hypothetical protein LOC100242745	[J]	Translation, ribosomal structure and biogenesis	Elongation factor Tu domain 2	--	PREDICTED: eukaryotic translation initiation factor 5B-like, partial [Beta vulgaris subsp. vulgaris]
c63419.graph_c0	--	--	--	--	--	--	--	--	PREDICTED: uncharacterized protein LOC104896672 [Beta vulgaris subsp. vulgaris]
c40102.graph_c1	--	--	--	--	[R]	General function prediction only	--	--	Cysteine-rich RLK (RECEPTOR-like protein kinase) 8, putative [Theobroma cacao]
c41939.graph_c0	--	--	Molecular Function: metal ion binding (GO:0046872);;	--	[O]	Posttranslational modification, protein turnover, chaperones	Ring finger domain;; RING-H2 zinc finger;; Zinc finger, C3HC4 type (RING finger)	RING-H2 finger protein ATL67 GN=ATL67 OS=Arabidopsis thaliana (Mouse-ear cress) PE=2 SV=1	PREDICTED: RING-H2 finger protein ATL67-like [Beta vulgaris subsp. vulgaris]
c38833.graph_c1	--	--	--	--	--	--	F-box associated;; F-box associated domain;; F-box domain	F-box/kelch-repeat protein At3g06240 GN=At3g06240 OS=Arabidopsis thaliana (Mouse-ear cress) PE=2 SV=1	PREDICTED: F-box/kelch-repeat protein At3g06240-like [Beta vulgaris subsp. vulgaris]
c35487.graph_c0	--	--	--	--	[T]	Signal transduction mechanisms	--	--	PREDICTED: uncharacterized protein LOC104894296 isoform X1 [Beta vulgaris subsp. vulgaris]
c42338.graph_c0	--	--	Cellular Component: membrane part (GO:0044425);;	--	--	--	Oxygen evolving enhancer protein 3 (PsbQ)	PsbQ-like protein 3, chloroplastic (Precursor) GN=PQL3 OS=Arabidopsis thaliana (Mouse-ear cress) PE=2 SV=1	PREDICTED: psbQ-like protein 3, chloroplastic [Beta vulgaris subsp. vulgaris]
c2852.graph_c0	--	--	--	--	--	--	Protein of unknown function (DUF640)	Protein LIGHT-DEPENDENT SHORT HYPOCOTYLS 10 GN=F14N22 OS=Arabidopsis thaliana (Mouse-ear cress) PE=1 SV=1	unnamed protein product [Coffea canephora]
c47905.graph_c0	--	--	Cellular Component: ubiquitin ligase complex (GO:0000151);; Molecular Function: ubiquitin-protein ligase activity (GO:0004842);; Cellular Component: nucleus (GO:0005634);; Biological Process: membrane fusion (GO:0006944);; Biological Process: protein ubiquitination (GO:0016567);; Biological Process: actin filament-based movement (GO:0030048);; Biological Process: cellular process involved in repr…	--	[S]	Function unknown	Armadillo/beta-catenin-like repeat	U-box domain-containing protein 15 GN=PUB15 OS=Arabidopsis thaliana (Mouse-ear cress) PE=2 SV=2	PREDICTED: U-box domain-containing protein 15 [Beta vulgaris subsp. vulgaris]
c41702.graph_c0	[L]	Replication, recombination and repair	Molecular Function: DNA topoisomerase activity (GO:0003916);; Biological Process: post-embryonic development (GO:0009791);; Biological Process: organ morphogenesis (GO:0009887);; Biological Process: shoot system morphogenesis (GO:0010016);; Biological Process: single-organism cellular process (GO:0044763);; Biological Process: meristem development (GO:0048507);; Biological Process: reproductive s…	K03163|0.0|pop:POPTR_1069943|hypothetical protein	[L]	Replication, recombination and repair	Eukaryotic DNA topoisomerase I, DNA binding fragment;; Eukaryotic DNA topoisomerase I, catalytic core;; C-terminal topoisomerase domain	DNA topoisomerase 1 GN=TOP1 OS=Arabidopsis thaliana (Mouse-ear cress) PE=1 SV=1	PREDICTED: DNA topoisomerase 1-like [Beta vulgaris subsp. vulgaris]
c59356.graph_c0	--	--	Molecular Function: nucleotide binding (GO:0000166);; Molecular Function: transferase activity, transferring phosphorus-containing groups (GO:0016772);;	K00933|1e-28|zma:100382894|hypothetical protein LOC100382894	[C]	Energy production and conversion	ATP:guanido phosphotransferase, C-terminal catalytic domain	--	creatine kinase, mitochondrial precursor [Phytophthora infestans T30-4]
c25261.graph_c0	[J]	Translation, ribosomal structure and biogenesis	Molecular Function: translation elongation factor activity (GO:0003746);; Molecular Function: translation release factor activity (GO:0003747);; Molecular Function: GTPase activity (GO:0003924);; Molecular Function: protein binding (GO:0005515);; Molecular Function: ATP binding (GO:0005524);; Molecular Function: GTP binding (GO:0005525);; Cellular Component: plasma membrane (GO:0005886);; Biologi…	K03231|0.0|cme:CMH226C|eukaryotic translation elongation factor 1 alpha (eEF-1a)	[J]	Translation, ribosomal structure and biogenesis	Elongation factor Tu GTP binding domain;; Elongation factor Tu C-terminal domain;; Elongation factor Tu domain 2	Elongation factor 1-alpha GN=REFA4 OS=Oryza sativa subsp. japonica (Rice) PE=2 SV=2	putative elongation factor [Chaetomium thermophilum var. thermophilum DSM 1495]
c26777.graph_c0	[J]	Translation, ribosomal structure and biogenesis	Molecular Function: binding (GO:0005488);;	--	--	--	Basic leucine-zipper C terminal;; bZIP transcription factor;; Basic region leucine zipper;; Ribosomal protein L14p/L23e	Light-inducible protein CPRF2 GN=CPRF2 OS=Petroselinum crispum (Parsley) PE=2 SV=2	PREDICTED: light-inducible protein CPRF2 [Beta vulgaris subsp. vulgaris]
c43561.graph_c0	--	--	--	--	--	--	SEC-C motif	--	PREDICTED: uncharacterized protein LOC104890978 isoform X1 [Beta vulgaris subsp. vulgaris]
c71509.graph_c0	[L]	Replication, recombination and repair	Molecular Function: nucleic acid binding (GO:0003676);; Molecular Function: catalytic activity (GO:0003824);; Biological Process: DNA metabolic process (GO:0006259);;	--	[R]	General function prediction only	--	Uncharacterized mitochondrial protein AtMg00860 GN=AtMg00860 OS=Arabidopsis thaliana (Mouse-ear cress) PE=4 SV=1	reverse transcriptase, partial [Brassica napus]
c37336.graph_c0	[RTKL]	--	Molecular Function: protein serine/threonine kinase activity (GO:0004674);; Molecular Function: ATP binding (GO:0005524);; Biological Process: protein phosphorylation (GO:0006468);;	--	--	--	Protein tyrosine kinase;; Protein kinase domain;; Regulator of chromosome condensation (RCC1) repeat	Serine/threonine-protein kinase-like protein ACR4 (Precursor) GN=ACR4 OS=Arabidopsis thaliana (Mouse-ear cress) PE=1 SV=1	PREDICTED: serine/threonine-protein kinase-like protein ACR4 [Beta vulgaris subsp. vulgaris]
c39242.graph_c0	--	--	--	K06100|0.0|rcu:RCOM_1584120|hypothetical protein	[A]	RNA processing and modification	Symplekin tight junction protein C terminal;; Domain of unknown function (DUF3453)	--	PREDICTED: uncharacterized protein LOC104905104 [Beta vulgaris subsp. vulgaris]
c20556.graph_c0	[RTKL]	--	Molecular Function: protein serine/threonine kinase activity (GO:0004674);; Molecular Function: protein serine/threonine/tyrosine kinase activity (GO:0004712);; Molecular Function: ATP binding (GO:0005524);; Biological Process: protein phosphorylation (GO:0006468);;	--	[T]	Signal transduction mechanisms	Protein kinase domain;; Protein tyrosine kinase;; Protein kinase domain	Serine/threonine-protein kinase AFC2 GN=AFC2 OS=Arabidopsis thaliana (Mouse-ear cress) PE=1 SV=1	PREDICTED: serine/threonine-protein kinase AFC2-like [Beta vulgaris subsp. vulgaris]
c43179.graph_c0	[GEPR]	--	Molecular Function: inorganic phosphate transmembrane transporter activity (GO:0005315);; Cellular Component: nucleus (GO:0005634);; Cellular Component: vacuole (GO:0005773);; Cellular Component: plasma membrane (GO:0005886);; Biological Process: phosphate ion transport (GO:0006817);; Biological Process: response to abscisic acid (GO:0009737);; Molecular Function: symporter activity (GO:0015293);…	K08176|0.0|osa:4335115|Os04g0186400	[P]	Inorganic ion transport and metabolism	Sugar (and other) transporter;; Major Facilitator Superfamily	Probable inorganic phosphate transporter 1-4 GN=PHT1-4 OS=Oryza sativa subsp. indica (Rice) PE=2 SV=2	PREDICTED: probable inorganic phosphate transporter 1-4 [Beta vulgaris subsp. vulgaris]
c50433.graph_c0	--	--	Cellular Component: mitochondrion (GO:0005739);;	--	--	--	--	--	hypothetical protein ZeamMp101 [Zea mays subsp. mays]
c12186.graph_c0	[R]	General function prediction only	Molecular Function: calmodulin binding (GO:0005516);;	K06911|1e-174|vvi:100241784|hypothetical protein LOC100241784	--	--	Pirin C-terminal cupin domain;; Pirin;; Cupin domain	Pirin-like protein OS=Solanum lycopersicum (Tomato) PE=2 SV=1	PREDICTED: pirin-like protein [Beta vulgaris subsp. vulgaris]
c9127.graph_c0	--	--	--	--	--	--	--	--	PREDICTED: uncharacterized protein LOC104907373 [Beta vulgaris subsp. vulgaris]
c42919.graph_c0	[R]	General function prediction only	Molecular Function: dioxygenase activity (GO:0051213);;	--	[QR]	--	non-haem dioxygenase in morphine synthesis N-terminal;; 2OG-Fe(II) oxygenase superfamily	Feruloyl CoA ortho-hydroxylase 2 GN=F6&apos;H2 OS=Arabidopsis thaliana (Mouse-ear cress) PE=1 SV=1	PREDICTED: feruloyl CoA ortho-hydroxylase 2-like [Nicotiana tomentosiformis]
c36103.graph_c0	[RTKL]	--	--	--	[R]	General function prediction only	Protein tyrosine kinase;; Protein kinase domain;; Universal stress protein family;; PPR repeat family;; PPR repeat;; Pentatricopeptide repeat domain;; PPR repeat	Pentatricopeptide repeat-containing protein At4g19191, mitochondrial (Precursor) GN=PCMP-E1 OS=Arabidopsis thaliana (Mouse-ear cress) PE=2 SV=1	PREDICTED: pentatricopeptide repeat-containing protein At4g19191, mitochondrial [Beta vulgaris subsp. vulgaris]
c38763.graph_c0	[Q]	Secondary metabolites biosynthesis, transport and catabolism	--	--	[I]	Lipid transport and metabolism	Male sterility protein;; Male sterility protein;; NAD dependent epimerase/dehydratase family	Fatty acyl-CoA reductase 6, chloroplastic (Precursor) GN=FAR6 OS=Arabidopsis thaliana (Mouse-ear cress) PE=2 SV=1	PREDICTED: fatty acyl-CoA reductase 2-like [Eucalyptus grandis]
c11184.graph_c0	[O]	Posttranslational modification, protein turnover, chaperones	Molecular Function: structural constituent of ribosome (GO:0003735);; Cellular Component: cell wall (GO:0005618);; Cellular Component: nucleolus (GO:0005730);; Cellular Component: vacuolar membrane (GO:0005774);; Cellular Component: Golgi apparatus (GO:0005794);; Cellular Component: plasma membrane (GO:0005886);; Biological Process: chromatin silencing (GO:0006342);; Biological Process: translati…	--	[J]	Translation, ribosomal structure and biogenesis	Ubiquitin family;; Ubiquitin-2 like Rad60 SUMO-like;; Ubiquitin-like domain	Ubiquitin (Precursor) OS=Lupinus polyphyllus (Large-leaved lupin) PE=3 SV=2	ubiquitin, partial [Nicotiana benthamiana]
c18742.graph_c0	--	--	--	--	--	--	--	--	PREDICTED: uncharacterized protein LOC104886572 [Beta vulgaris subsp. vulgaris]
c42322.graph_c0	[K]	Transcription	Biological Process: phosphatidylglycerol biosynthetic process (GO:0006655);; Cellular Component: chloroplast (GO:0009507);; Cellular Component: plastid chromosome (GO:0009508);; Biological Process: chloroplast relocation (GO:0009902);; Biological Process: thylakoid membrane organization (GO:0010027);; Biological Process: isopentenyl diphosphate biosynthetic process, methylerythritol 4-phosphate p…	--	--	--	Transcription termination factor nusG	--	PREDICTED: uncharacterized protein LOC104906463 [Beta vulgaris subsp. vulgaris]
c39315.graph_c0	[R]	General function prediction only	Molecular Function: nucleotide binding (GO:0000166);; Molecular Function: nucleic acid binding (GO:0003676);;	--	[A]	RNA processing and modification	EF-hand domain pair	Serine/arginine-rich splicing factor RS31 GN=F21F14.30 OS=Arabidopsis thaliana (Mouse-ear cress) PE=1 SV=2	PREDICTED: serine/arginine-rich splicing factor RS31-like [Beta vulgaris subsp. vulgaris]
c13350.graph_c0	--	--	Cellular Component: plasma membrane (GO:0005886);; Cellular Component: integral component of membrane (GO:0016021);;	--	--	--	Domain of unknown function (DUF588)	CASP-like protein ARALYDRAFT_485429 GN=ARALYDRAFT_485429 OS=Arabidopsis lyrata subsp. lyrata (Lyre-leaved rock-cress) PE=3 SV=2	PREDICTED: CASP-like protein 5C1 [Beta vulgaris subsp. vulgaris]
c11364.graph_c0	--	--	Cellular Component: integral component of membrane (GO:0016021);;	--	[U]	Intracellular trafficking, secretion, and vesicular transport	Endomembrane protein 70	Transmembrane 9 superfamily member 1 {ECO:0000305} (Precursor) OS=Arabidopsis thaliana (Mouse-ear cress) PE=1 SV=1	PREDICTED: transmembrane 9 superfamily member 1-like [Beta vulgaris subsp. vulgaris]
c46475.graph_c0	[I]	Lipid transport and metabolism	Molecular Function: transferase activity, transferring alkyl or aryl (other than methyl) groups (GO:0016765);; Molecular Function: metal ion binding (GO:0046872);;	K11778|3e-34|vvi:100244987|hypothetical protein LOC100244987	[I]	Lipid transport and metabolism	Putative undecaprenyl diphosphate synthase	Dehydrodolichyl diphosphate synthase 2 GN=At5g58770 OS=Arabidopsis thaliana (Mouse-ear cress) PE=2 SV=2	PREDICTED: dehydrodolichyl diphosphate synthase 2 [Beta vulgaris subsp. vulgaris]
c60444.graph_c0	--	--	--	--	--	--	--	Formin-like protein 14 (Precursor) GN=P0668H12.11 OS=Oryza sativa subsp. japonica (Rice) PE=2 SV=1	hypothetical protein CHGG_10452 [Chaetomium globosum CBS 148.51]
c40920.graph_c0	[OC]	--	Molecular Function: protein binding (GO:0005515);; Biological Process: glycerol ether metabolic process (GO:0006662);; Molecular Function: electron carrier activity (GO:0009055);; Cellular Component: chloroplast (GO:0009507);; Molecular Function: protein disulfide oxidoreductase activity (GO:0015035);; Biological Process: electron transport chain (GO:0022900);; Biological Process: cell redox home…	--	[O]	Posttranslational modification, protein turnover, chaperones	Thioredoxin;; Thioredoxin-like domain;; Thioredoxin-like;; Thioredoxin;; Thioredoxin-like	Thioredoxin M-type Md (Precursor) OS=Spinacia oleracea (Spinach) PE=1 SV=2	PREDICTED: thioredoxin M-type, chloroplastic-like [Beta vulgaris subsp. vulgaris]
c31519.graph_c0	--	--	Cellular Component: cytosol (GO:0005829);; Cellular Component: plasma membrane (GO:0005886);; Biological Process: glycolysis (GO:0006096);; Biological Process: water transport (GO:0006833);; Biological Process: hyperosmotic response (GO:0006972);; Biological Process: Golgi organization (GO:0007030);; Biological Process: response to temperature stimulus (GO:0009266);; Cellular Component: chloropla…	--	--	--	Stress responsive A/B Barrel Domain	Probable protein Pop3 GN=At3g17210 OS=Arabidopsis thaliana (Mouse-ear cress) PE=1 SV=1	PREDICTED: probable protein Pop3 [Beta vulgaris subsp. vulgaris]
c37214.graph_c1	[C]	Energy production and conversion	Biological Process: cytokinin metabolic process (GO:0009690);; Molecular Function: oxidoreductase activity, acting on CH-OH group of donors (GO:0016614);;	K00279|1e-162|rcu:RCOM_0707270|gulonolactone oxidase, putative (EC:1.5.99.12)	[C]	Energy production and conversion	Cytokinin dehydrogenase 1, FAD and cytokinin binding;; FAD binding domain	Cytokinin dehydrogenase 7 GN=F13M11.? OS=Arabidopsis thaliana (Mouse-ear cress) PE=1 SV=1	PREDICTED: cytokinin dehydrogenase 7 [Beta vulgaris subsp. vulgaris]
c3578.graph_c0	--	--	Molecular Function: nucleic acid binding (GO:0003676);; Biological Process: DNA integration (GO:0015074);;	--	[R]	General function prediction only	--	Uncharacterized mitochondrial protein AtMg00760 GN=AtMg00760 OS=Arabidopsis thaliana (Mouse-ear cress) PE=4 SV=1	PREDICTED: uncharacterized protein LOC104899241 [Beta vulgaris subsp. vulgaris]
c40998.graph_c0	[C]	Energy production and conversion	Biological Process: ATP hydrolysis coupled proton transport (GO:0015991);; Cellular Component: proton-transporting two-sector ATPase complex, catalytic domain (GO:0033178);; Molecular Function: proton-transporting ATPase activity, rotational mechanism (GO:0046961);;	K02150|1e-117|rcu:RCOM_1690700|vacuolar ATP synthase subunit E, putative	[C]	Energy production and conversion	ATP synthase (E/31 kDa) subunit	V-type proton ATPase subunit E GN=VATE OS=Spinacia oleracea (Spinach) PE=2 SV=1	PREDICTED: V-type proton ATPase subunit E [Beta vulgaris subsp. vulgaris]
c28633.graph_c0	[O]	Posttranslational modification, protein turnover, chaperones	Molecular Function: ATP binding (GO:0005524);; Cellular Component: mitochondrion (GO:0005739);; Cellular Component: vacuolar membrane (GO:0005774);; Biological Process: protein refolding (GO:0042026);; Biological Process: response to cadmium ion (GO:0046686);;	--	[O]	Posttranslational modification, protein turnover, chaperones	TCP-1/cpn60 chaperonin family	Chaperonin CPN60-like 2, mitochondrial (Precursor) GN=At3g13860 OS=Arabidopsis thaliana (Mouse-ear cress) PE=2 SV=2	PREDICTED: chaperonin CPN60-like 2, mitochondrial [Beta vulgaris subsp. vulgaris]
c37117.graph_c0	[T]	Signal transduction mechanisms	Molecular Function: hydrolase activity (GO:0016787);;	K14497|1e-168|vvi:100255251|hypothetical protein LOC100255251	[T]	Signal transduction mechanisms	Protein phosphatase 2C;; Protein phosphatase 2C	Probable protein phosphatase 2C 24 GN=At2g29380 OS=Arabidopsis thaliana (Mouse-ear cress) PE=2 SV=1	PREDICTED: probable protein phosphatase 2C 24 [Beta vulgaris subsp. vulgaris]
c59137.graph_c0	--	--	--	--	--	--	--	--	Ty3/gypsy retrotransposon protein [Beta vulgaris subsp. vulgaris]
c39154.graph_c1	--	--	--	--	--	--	D-mannose binding lectin;; S-locus glycoprotein family;; PAN-like domain	G-type lectin S-receptor-like serine/threonine-protein kinase At1g11330 (Precursor) GN=At1g11330 OS=Arabidopsis thaliana (Mouse-ear cress) PE=2 SV=3	PREDICTED: G-type lectin S-receptor-like serine/threonine-protein kinase At1g11330 [Beta vulgaris subsp. vulgaris]
c11246.graph_c1	[O]	Posttranslational modification, protein turnover, chaperones	Molecular Function: ATP binding (GO:0005524);; Biological Process: proteolysis (GO:0006508);; Molecular Function: peptidase activity (GO:0008233);; Cellular Component: chloroplast (GO:0009507);; Molecular Function: nucleoside-triphosphatase activity (GO:0017111);;	K03696|0.0|vvi:100250896|hypothetical protein LOC100250896	[O]	Posttranslational modification, protein turnover, chaperones	AAA domain (Cdc48 subfamily);; Clp amino terminal domain;; ATPase family associated with various cellular activities (AAA);; C-terminal, D2-small domain, of ClpB protein;; AAA domain (dynein-related subfamily);; AAA ATPase domain;; Sigma-54 interaction domain;; AAA domain;; AAA domain;; UvrB/uvrC motif;; AAA domain;; IstB-like ATP binding protein;; AAA domain;; AAA domain;; 50S ribosome-binding G…	ATP-dependent Clp protease ATP-binding subunit clpA homolog CD4B, chloroplastic (Precursor) GN=CD4B OS=Solanum lycopersicum (Tomato) PE=3 SV=1	PREDICTED: ATP-dependent Clp protease ATP-binding subunit clpA homolog CD4B, chloroplastic [Beta vulgaris subsp. vulgaris]
c18733.graph_c0	--	--	--	--	[R]	General function prediction only	gag-polypeptide of LTR copia-type;; gag-polypeptide of LTR copia-type	Cold shock domain-containing protein 4 GN=F26H11.18 OS=Arabidopsis thaliana (Mouse-ear cress) PE=1 SV=1	PREDICTED: uncharacterized protein LOC104601673 [Nelumbo nucifera]
c5080.graph_c0	--	--	--	--	[R]	General function prediction only	--	Putative pentatricopeptide repeat-containing protein At3g13770, mitochondrial (Precursor) GN=PCMP-H85 OS=Arabidopsis thaliana (Mouse-ear cress) PE=3 SV=1	PREDICTED: pentatricopeptide repeat-containing protein At3g16610-like [Beta vulgaris subsp. vulgaris]
c67690.graph_c0	--	--	Cellular Component: membrane (GO:0016020);; Molecular Function: transferase activity (GO:0016740);;	--	[G]	Carbohydrate transport and metabolism	--	Putative glucuronosyltransferase PGSIP8 GN=PGSIP8 OS=Arabidopsis thaliana (Mouse-ear cress) PE=2 SV=1	PREDICTED: putative glucuronosyltransferase PGSIP8 [Beta vulgaris subsp. vulgaris]
c39393.graph_c0	--	--	--	--	[S]	Function unknown	Ankyrin repeats (3 copies);; Ankyrin repeat;; Ankyrin repeats (many copies);; IPT/TIG domain;; Ankyrin repeat;; CG-1 domain	Calmodulin-binding transcription activator 2 GN=MSJ1.6 OS=Arabidopsis thaliana (Mouse-ear cress) PE=1 SV=1	PREDICTED: calmodulin-binding transcription activator 3 isoform X2 [Beta vulgaris subsp. vulgaris]
c5285.graph_c0	--	--	--	--	--	--	Protein of unknown function (DUF1262)	--	PREDICTED: uncharacterized protein LOC104896316 [Beta vulgaris subsp. vulgaris]
c32911.graph_c0	[I]	Lipid transport and metabolism	Cellular Component: peroxisome (GO:0005777);; Biological Process: fatty acid beta-oxidation (GO:0006635);; Molecular Function: isomerase activity (GO:0016853);;	K01692|1e-138|vvi:100246523|hypothetical protein LOC100246523	[I]	Lipid transport and metabolism	Enoyl-CoA hydratase/isomerase family	1,4-dihydroxy-2-naphthoyl-CoA synthase, peroxisomal GN=MENB OS=Arabidopsis thaliana (Mouse-ear cress) PE=1 SV=2	PREDICTED: probable enoyl-CoA hydratase, mitochondrial [Beta vulgaris subsp. vulgaris]
c65424.graph_c0	--	--	--	--	--	--	--	Formin-like protein 18 (Precursor) GN=B1160F02.7 OS=Oryza sativa subsp. japonica (Rice) PE=2 SV=1	PREDICTED: oleosin-B6 [Brassica rapa]
c40208.graph_c0	--	--	Cellular Component: endoplasmic reticulum (GO:0005783);; Cellular Component: integral component of membrane (GO:0016021);;	K05289|0.0|vvi:100245727|hypothetical protein LOC100245727	[O]	Posttranslational modification, protein turnover, chaperones	Gaa1-like, GPI transamidase component	--	PREDICTED: glycosylphosphatidylinositol anchor attachment 1 protein [Beta vulgaris subsp. vulgaris]
c39622.graph_c0	--	--	--	--	--	--	Domain of unknown function (DUF3883)	--	PREDICTED: uncharacterized protein LOC104889802 [Beta vulgaris subsp. vulgaris]
c10837.graph_c0	--	--	--	--	--	--	--	--	PREDICTED: myb-like protein A isoform X2 [Beta vulgaris subsp. vulgaris]
c1443.graph_c0	--	--	--	--	--	--	--	--	PREDICTED: glycine-rich cell wall structural protein-like [Beta vulgaris subsp. vulgaris]
c18033.graph_c0	--	--	Biological Process: fatty acid biosynthetic process (GO:0006633);; Cellular Component: membrane (GO:0016020);; Molecular Function: transferase activity, transferring acyl groups other than amino-acyl groups (GO:0016747);;	--	--	--	--	3-ketoacyl-CoA synthase 11 GN=KCS11 OS=Arabidopsis thaliana (Mouse-ear cress) PE=2 SV=1	3-ketoacyl-CoA synthase 11 [Gossypium raimondii]
c53114.graph_c0	--	--	--	--	--	--	--	--	PREDICTED: zinc finger CCCH domain-containing protein 2-like [Beta vulgaris subsp. vulgaris]
c38567.graph_c0	--	--	--	--	--	--	--	--	BnaC09g29270D [Brassica napus]
c16920.graph_c0	--	--	--	--	--	--	--	--	PREDICTED: uncharacterized protein LOC104889125 [Beta vulgaris subsp. vulgaris]
c72588.graph_c0	--	--	--	--	--	--	Leucine Rich repeats (2 copies);; Leucine Rich Repeat;; Leucine rich repeat;; Leucine Rich repeat;; Leucine rich repeat	Probable LRR receptor-like serine/threonine-protein kinase At1g34110 (Precursor) GN=At1g34110 OS=Arabidopsis thaliana (Mouse-ear cress) PE=2 SV=2	PREDICTED: LRR receptor-like serine/threonine-protein kinase GSO1 [Beta vulgaris subsp. vulgaris]
c38500.graph_c2	--	--	--	--	[R]	General function prediction only	PPR repeat;; PPR repeat family;; PPR repeat;; Pentatricopeptide repeat domain	Pentatricopeptide repeat-containing protein At4g21065 GN=PCMP-H28 OS=Arabidopsis thaliana (Mouse-ear cress) PE=2 SV=2	PREDICTED: LOW QUALITY PROTEIN: putative pentatricopeptide repeat-containing protein At5g59200, chloroplastic [Beta vulgaris subsp. vulgaris]
c20837.graph_c0	--	--	--	--	--	--	Helix-loop-helix DNA-binding domain	Transcription factor BIM2 GN=T6L1.19 OS=Arabidopsis thaliana (Mouse-ear cress) PE=1 SV=1	PREDICTED: transcription factor BIM2 isoform X2 [Beta vulgaris subsp. vulgaris]
c56650.graph_c0	--	--	Molecular Function: metal ion binding (GO:0046872);;	--	--	--	Cupin	Germin-like protein (Precursor) OS=Mesembryanthemum crystallinum (Common ice plant) PE=2 SV=1	PREDICTED: putative germin-like protein 2-1 [Beta vulgaris subsp. vulgaris]
c39166.graph_c0	--	--	--	K03165|2e-20|vvi:100248256|hypothetical protein LOC100248256	[L]	Replication, recombination and repair	--	DNA topoisomerase 3-alpha GN=OJ1123F12.5 OS=Oryza sativa subsp. japonica (Rice) PE=3 SV=1	PREDICTED: DNA topoisomerase 3-alpha isoform X2 [Beta vulgaris subsp. vulgaris]
c71007.graph_c0	--	--	--	--	--	--	--	--	hypothetical protein [Beta vulgaris subsp. vulgaris]
c36993.graph_c0	[O]	Posttranslational modification, protein turnover, chaperones	Molecular Function: ligase activity (GO:0016874);;	--	[O]	Posttranslational modification, protein turnover, chaperones	Ubiquitin-conjugating enzyme	Putative ubiquitin-conjugating enzyme E2 38 GN=UBC38 OS=Arabidopsis thaliana (Mouse-ear cress) PE=1 SV=2	PREDICTED: probable ubiquitin-conjugating enzyme E2 26 [Beta vulgaris subsp. vulgaris]
c652.graph_c0	--	--	--	K14488|9e-25|vvi:100255700|hypothetical protein LOC100255700	--	--	Auxin responsive protein	Auxin-induced protein 15A OS=Glycine max (Soybean) PE=2 SV=1	PREDICTED: uncharacterized protein LOC100796005 [Glycine max]
c13425.graph_c0	--	--	--	--	--	--	--	DEAD-box ATP-dependent RNA helicase 42 GN=F9H16.10 OS=Arabidopsis thaliana (Mouse-ear cress) PE=1 SV=2	PREDICTED: RNA-binding protein 25 [Beta vulgaris subsp. vulgaris]
c29476.graph_c0	--	--	--	--	--	--	NYN domain;; OST-HTH Associated domain	BTB/POZ domain-containing protein At2g13690 GN=PRL1-IFG OS=Arabidopsis thaliana (Mouse-ear cress) PE=2 SV=2	PREDICTED: meiosis arrest female protein 1-like isoform X2 [Beta vulgaris subsp. vulgaris]
c65983.graph_c0	--	--	Molecular Function: DNA binding (GO:0003677);;	--	[R]	General function prediction only	Domain of unknown function (DUF4283)	--	PREDICTED: uncharacterized protein LOC104908989 [Beta vulgaris subsp. vulgaris]
c17439.graph_c0	--	--	Molecular Function: DNA binding (GO:0003677);; Molecular Function: sequence-specific DNA binding transcription factor activity (GO:0003700);; Molecular Function: protein binding (GO:0005515);; Cellular Component: nucleus (GO:0005634);; Cellular Component: cytoplasm (GO:0005737);; Cellular Component: plasma membrane (GO:0005886);; Biological Process: cell death (GO:0008219);; Biological Process: r…	--	--	--	AP2 domain	Ethylene-responsive transcription factor RAP2-3 OS=Arabidopsis thaliana (Mouse-ear cress) PE=1 SV=2	PREDICTED: ethylene-responsive transcription factor RAP2-3 [Beta vulgaris subsp. vulgaris]
c80762.graph_c0	--	--	--	--	[OE]	--	Serine carboxypeptidase	Serine carboxypeptidase-like 45 (Precursor) GN=SCPL45 OS=Arabidopsis thaliana (Mouse-ear cress) PE=2 SV=1	unknown [Medicago truncatula]
c33841.graph_c0	--	--	--	--	[U]	Intracellular trafficking, secretion, and vesicular transport	Reticulon;; Reticulon	Reticulon-like protein B12 GN=RTNLB12 OS=Arabidopsis thaliana (Mouse-ear cress) PE=2 SV=1	PREDICTED: reticulon-like protein B12 [Beta vulgaris subsp. vulgaris]
c25442.graph_c0	--	--	--	--	--	--	--	--	PREDICTED: uncharacterized protein At1g04910 [Beta vulgaris subsp. vulgaris]
c66353.graph_c0	--	--	--	--	[R]	General function prediction only	Integrase core domain	Endonuclease OS=Nicotiana tabacum (Common tobacco) PE=2 SV=1	PREDICTED: uncharacterized protein LOC104888623 [Beta vulgaris subsp. vulgaris]
c54039.graph_c0	--	--	--	--	--	--	--	--	PREDICTED: uncharacterized protein LOC104902966 isoform X2 [Beta vulgaris subsp. vulgaris]
c17343.graph_c0	--	--	Molecular Function: phosphatidylinositol phospholipase C activity (GO:0004435);; Molecular Function: signal transducer activity (GO:0004871);; Molecular Function: calcium ion binding (GO:0005509);; Biological Process: lipid metabolic process (GO:0006629);; Biological Process: intracellular signal transduction (GO:0035556);;	K05857|6e-91|vvi:100255373|hypothetical protein LOC100255373	[T]	Signal transduction mechanisms	C2 domain;; Phosphatidylinositol-specific phospholipase C, Y domain	Phosphoinositide phospholipase C 6 GN=PLC6 OS=Arabidopsis thaliana (Mouse-ear cress) PE=2 SV=2	PREDICTED: phosphoinositide phospholipase C 4-like [Beta vulgaris subsp. vulgaris]
c12671.graph_c0	[J]	Translation, ribosomal structure and biogenesis	Molecular Function: RNA binding (GO:0003723);;	K02945|0.0|vvi:100240915|hypothetical protein LOC100240915	--	--	S1 RNA binding domain	30S ribosomal protein S1, chloroplastic (Precursor) GN=RPS1 OS=Spinacia oleracea (Spinach) PE=1 SV=1	PREDICTED: uncharacterized protein LOC104894514 [Beta vulgaris subsp. vulgaris]
c34089.graph_c0	--	--	Cellular Component: chloroplast (GO:0009507);; Biological Process: negative regulation of transcription, DNA-templated (GO:0045892);;	--	[S]	Function unknown	Protein of unknown function (DUF726);; Protein of unknown function (DUF726);; Alpha/beta hydrolase family	--	hypothetical protein POPTR_0007s13750g [Populus trichocarpa]
c30382.graph_c0	--	--	--	--	--	--	Helix-loop-helix DNA-binding domain	Transcription factor UNE12 GN=T10P11.13 OS=Arabidopsis thaliana (Mouse-ear cress) PE=2 SV=2	PREDICTED: transcription factor UNE12 [Beta vulgaris subsp. vulgaris]
c36234.graph_c0	--	--	--	--	--	--	Domain of unknown function (DUF3527)	--	PREDICTED: uncharacterized protein LOC104893813 [Beta vulgaris subsp. vulgaris]
c23760.graph_c0	--	--	--	--	[R]	General function prediction only	Leucine Rich repeat;; Leucine Rich repeats (2 copies);; Leucine rich repeat;; Leucine Rich Repeat;; Leucine rich repeat;; Leucine Rich repeat;; Leucine Rich repeats (2 copies);; Leucine Rich Repeat	F-box/LRR-repeat protein 3 GN=FBL3 OS=Arabidopsis thaliana (Mouse-ear cress) PE=2 SV=1	PREDICTED: F-box/LRR-repeat protein 3-like [Beta vulgaris subsp. vulgaris]
c78871.graph_c0	[L]	Replication, recombination and repair	Cellular Component: membrane (GO:0016020);; Biological Process: single-organism cellular process (GO:0044763);;	--	--	--	Phage integrase family	--	hypothetical protein OsI_15703 [Oryza sativa Indica Group]
c10249.graph_c0	--	--	--	--	--	--	--	--	PREDICTED: putative pentatricopeptide repeat-containing protein At1g12700, mitochondrial [Beta vulgaris subsp. vulgaris]
c8345.graph_c0	[RTKL]	--	Molecular Function: nucleotide binding (GO:0000166);; Molecular Function: protein kinase activity (GO:0004672);; Biological Process: phosphorylation (GO:0016310);;	--	--	--	Protein tyrosine kinase;; Protein kinase domain	Cysteine-rich receptor-like protein kinase 15 (Precursor) GN=CRK15 OS=Arabidopsis thaliana (Mouse-ear cress) PE=2 SV=2	PREDICTED: putative receptor-like protein kinase At4g00960 [Beta vulgaris subsp. vulgaris]
c66549.graph_c0	--	--	Biological Process: transition metal ion transport (GO:0000041);; Molecular Function: peroxidase activity (GO:0004601);; Molecular Function: binding (GO:0005488);; Cellular Component: extracellular region (GO:0005576);;	--	--	--	--	Peroxidase 20 (Precursor) GN=T32F12.24 OS=Arabidopsis thaliana (Mouse-ear cress) PE=2 SV=1	PREDICTED: peroxidase 20 [Beta vulgaris subsp. vulgaris]
c33067.graph_c0	--	--	--	--	--	--	--	Uncharacterized GPI-anchored protein At1g61900 (Precursor) GN=At1g61900 OS=Arabidopsis thaliana (Mouse-ear cress) PE=1 SV=1	PREDICTED: uncharacterized GPI-anchored protein At1g61900 [Beta vulgaris subsp. vulgaris]
c46217.graph_c0	--	--	--	--	[R]	General function prediction only	--	Zinc finger protein MAGPIE {ECO:0000303|PubMed:17785527} OS=Arabidopsis thaliana (Mouse-ear cress) PE=1 SV=1	PREDICTED: zinc finger protein MAGPIE [Beta vulgaris subsp. vulgaris]
c72421.graph_c0	--	--	--	--	[AR]	--	KH domain;; KH domain;; KH domain	--	Putative Kh domain rna binding protein [Rhizopus microsporus]
c67149.graph_c0	--	--	--	--	--	--	--	--	PREDICTED: uncharacterized protein LOC104884909 [Beta vulgaris subsp. vulgaris]
c44429.graph_c0	--	--	--	K09264|5e-09|vvi:100232867|MADS2	[K]	Transcription	--	Developmental protein SEPALLATA 2 GN=F14P3.4 OS=Arabidopsis thaliana (Mouse-ear cress) PE=1 SV=1	PREDICTED: MADS-box protein CMB1-like [Beta vulgaris subsp. vulgaris]
c15289.graph_c0	[L]	Replication, recombination and repair	Biological Process: DNA metabolic process (GO:0006259);; Molecular Function: organic cyclic compound binding (GO:0097159);; Molecular Function: heterocyclic compound binding (GO:1901363);;	--	--	--	Rad51	--	Elp4 protein [Candida orthopsilosis Co 90-125]
c1655.graph_c0	--	--	--	--	--	--	--	--	putative reverse transcriptase family member [Malus domestica]
c41149.graph_c0	--	--	Biological Process: fatty acid biosynthetic process (GO:0006633);; Cellular Component: chloroplast (GO:0009507);; Molecular Function: acyl-[acyl-carrier-protein] desaturase activity (GO:0045300);; Molecular Function: transition metal ion binding (GO:0046914);; Biological Process: oxidation-reduction process (GO:0055114);;	K03921|0.0|rcu:RCOM_1238330|Stearoy-ACP desaturase (EC:1.14.19.2)	--	--	Fatty acid desaturase	Acyl-[acyl-carrier-protein] desaturase, chloroplastic (Precursor) OS=Spinacia oleracea (Spinach) PE=2 SV=1	RecName: Full=Acyl-[acyl-carrier-protein] desaturase, chloroplastic; AltName: Full=Stearoyl-ACP desaturase; Flags: Precursor [Spinacia oleracea]
c29401.graph_c0	--	--	Molecular Function: binding (GO:0005488);;	--	--	--	--	--	RNA-directed DNA polymerase (Reverse transcriptase) [Medicago truncatula]
c66519.graph_c0	--	--	--	--	[S]	Function unknown	BTB/POZ domain	BTB/POZ and MATH domain-containing protein 6 GN=BPM6 OS=Arabidopsis thaliana (Mouse-ear cress) PE=1 SV=1	hypothetical protein H257_06660 [Aphanomyces astaci]
c65474.graph_c0	--	--	--	--	--	--	--	--	PREDICTED: uncharacterized protein LOC104906467 [Beta vulgaris subsp. vulgaris]
c80807.graph_c0	--	--	--	--	--	--	--	--	PREDICTED: uncharacterized protein LOC104885371, partial [Beta vulgaris subsp. vulgaris]
c32764.graph_c1	--	--	--	--	--	--	--	--	PREDICTED: probable nucleoredoxin 1 [Beta vulgaris subsp. vulgaris]
c25568.graph_c0	--	--	Molecular Function: transferase activity, transferring phosphorus-containing groups (GO:0016772);;	--	--	--	--	Putative proline-rich receptor-like protein kinase PERK6 GN=PERK6 OS=Arabidopsis thaliana (Mouse-ear cress) PE=2 SV=2	hypothetical protein CaO19.63, partial [Candida albicans SC5314]
c35153.graph_c0	[G]	Carbohydrate transport and metabolism	--	--	--	--	--	Glycine-rich cell wall structural protein 1 (Precursor) GN=GRP-1 OS=Petunia hybrida (Petunia) PE=1 SV=1	PREDICTED: glycine-rich cell wall structural protein 1.8-like [Beta vulgaris subsp. vulgaris]
c68341.graph_c0	[Z]	Cytoskeleton	Molecular Function: GTPase activity (GO:0003924);; Molecular Function: structural constituent of cytoskeleton (GO:0005200);; Molecular Function: GTP binding (GO:0005525);; Cellular Component: cytoplasm (GO:0005737);; Cellular Component: microtubule (GO:0005874);; Biological Process: GTP catabolic process (GO:0006184);; Biological Process: microtubule-based process (GO:0007017);; Biological Proces…	--	[Z]	Cytoskeleton	Tubulin/FtsZ family, GTPase domain	Tubulin alpha-2 chain GN=TUBA2 OS=Pelvetia fastigiata PE=2 SV=1	predicted protein [Hordeum vulgare subsp. vulgare]
c31106.graph_c0	[M]	Cell wall/membrane/envelope biogenesis	Molecular Function: glycogenin glucosyltransferase activity (GO:0008466);;	--	[G]	Carbohydrate transport and metabolism	Glycosyl transferase family 8	UDP-glucuronate:xylan alpha-glucuronosyltransferase 2 GN=F17M5.90/F17M5.100 OS=Arabidopsis thaliana (Mouse-ear cress) PE=2 SV=1	PREDICTED: UDP-glucuronate:xylan alpha-glucuronosyltransferase 2 isoform X2 [Beta vulgaris subsp. vulgaris]
c23663.graph_c0	--	--	--	--	--	--	--	--	PREDICTED: 2-alkenal reductase (NADP(+)-dependent)-like [Beta vulgaris subsp. vulgaris]
c19371.graph_c0	--	--	--	--	--	--	--	--	hypothetical protein MTR_8g468960 [Medicago truncatula]
c26396.graph_c0	--	--	--	--	--	--	Protein of unknown function (DUF642)	--	PREDICTED: uncharacterized protein LOC104907775 [Beta vulgaris subsp. vulgaris]
c45101.graph_c0	--	--	Cellular Component: cytoplasmic membrane-bounded vesicle (GO:0016023);; Molecular Function: transferase activity, transferring phosphorus-containing groups (GO:0016772);;	--	--	--	Leucine Rich repeats (2 copies);; Leucine rich repeat;; Leucine Rich Repeat;; Leucine Rich repeat	Putative receptor-like protein kinase At3g47110 (Precursor) GN=At3g47110 OS=Arabidopsis thaliana (Mouse-ear cress) PE=3 SV=1	PREDICTED: probable LRR receptor-like serine/threonine-protein kinase At3g47570 [Musa acuminata subsp. malaccensis]
c41331.graph_c0	--	--	Cellular Component: mitochondrial respiratory chain complex I (GO:0005747);; Biological Process: ubiquitin-dependent protein catabolic process (GO:0006511);; Biological Process: photorespiration (GO:0009853);; Biological Process: response to misfolded protein (GO:0051788);; Biological Process: proteasome core complex assembly (GO:0080129);;	--	--	--	--	NADH dehydrogenase [ubiquinone] 1 beta subcomplex subunit 8, mitochondrial (Precursor) GN=At5g47570 OS=Arabidopsis thaliana (Mouse-ear cress) PE=2 SV=1	hypothetical protein CARUB_v10027375mg [Capsella rubella]
c39733.graph_c1	[J]	Translation, ribosomal structure and biogenesis	Molecular Function: aminoacyl-tRNA editing activity (GO:0002161);; Molecular Function: leucine-tRNA ligase activity (GO:0004823);; Molecular Function: ATP binding (GO:0005524);; Cellular Component: mitochondrion (GO:0005739);; Biological Process: rRNA processing (GO:0006364);; Biological Process: leucyl-tRNA aminoacylation (GO:0006429);; Biological Process: regulation of translational fidelity (G…	K01869|0.0|vvi:100255483|hypothetical protein LOC100255483	[J]	Translation, ribosomal structure and biogenesis	Leucyl-tRNA synthetase, Domain 2;; tRNA synthetases class I (I, L, M and V);; Anticodon-binding domain of tRNA;; tRNA synthetases class I (M);; tRNA synthetases class I (I, L, M and V);; tRNA synthetases class I (M)	Valine--tRNA ligase GN=VALRS OS=Arabidopsis thaliana (Mouse-ear cress) PE=2 SV=2	PREDICTED: putative leucine--tRNA ligase, mitochondrial [Beta vulgaris subsp. vulgaris]
c38912.graph_c0	--	--	Cellular Component: chloroplast (GO:0009507);;	--	--	--	--	--	PREDICTED: uncharacterized protein LOC104902702 [Beta vulgaris subsp. vulgaris]
c36151.graph_c0	[E]	Amino acid transport and metabolism	Biological Process: respiratory burst involved in defense response (GO:0002679);; Molecular Function: glutamate-ammonia ligase activity (GO:0004356);; Cellular Component: cytosol (GO:0005829);; Biological Process: glutamine biosynthetic process (GO:0006542);; Biological Process: tryptophan catabolic process (GO:0006569);; Molecular Function: microtubule binding (GO:0008017);; Biological Process: …	--	[E]	Amino acid transport and metabolism	Glutamine synthetase, catalytic domain;; Amidohydrolase	--	PREDICTED: protein fluG [Beta vulgaris subsp. vulgaris]
c19356.graph_c0	--	--	--	--	[K]	Transcription	PWWP domain	HUA2-like protein 2 GN=At3g63070 OS=Arabidopsis thaliana (Mouse-ear cress) PE=3 SV=1	PREDICTED: HUA2-like protein 3 [Beta vulgaris subsp. vulgaris]
c50213.graph_c0	[E]	Amino acid transport and metabolism	--	K08248|0.0|vvi:100254058|hypothetical protein LOC100254058	[R]	General function prediction only	GMC oxidoreductase;; GMC oxidoreductase	(R)-mandelonitrile lyase-like (Precursor) GN=At1g73050 OS=Arabidopsis thaliana (Mouse-ear cress) PE=2 SV=1	PREDICTED: (R)-mandelonitrile lyase-like [Beta vulgaris subsp. vulgaris]
c76029.graph_c0	--	--	--	--	--	--	Immunoglobulin I-set domain	--	--
c42211.graph_c0	--	--	--	--	[R]	General function prediction only	PPR repeat family;; PPR repeat;; PPR repeat;; Pentatricopeptide repeat domain;; Tetratricopeptide repeat;; Anaphase-promoting complex, cyclosome, subunit 3;; Tetratricopeptide repeat	Pentatricopeptide repeat-containing protein At1g10270 GN=GRP23 OS=Arabidopsis thaliana (Mouse-ear cress) PE=1 SV=1	PREDICTED: pentatricopeptide repeat-containing protein At1g10270-like [Beta vulgaris subsp. vulgaris]
c30778.graph_c0	--	--	--	--	--	--	--	--	PREDICTED: uncharacterized protein LOC104907109 [Beta vulgaris subsp. vulgaris]
c32518.graph_c0	--	--	Molecular Function: nucleotide binding (GO:0000166);; Molecular Function: protein kinase activity (GO:0004672);;	--	[T]	Signal transduction mechanisms	--	Transcriptional corepressor LEUNIG GN=LUG OS=Arabidopsis thaliana (Mouse-ear cress) PE=1 SV=2	PREDICTED: serine/threonine-protein kinase At5g01020 [Beta vulgaris subsp. vulgaris]
c78707.graph_c0	--	--	--	--	--	--	--	Bidirectional sugar transporter SWEET4 GN=SWEET4 OS=Arabidopsis thaliana (Mouse-ear cress) PE=2 SV=1	PREDICTED: bidirectional sugar transporter SWEET5-like isoform X2 [Nicotiana sylvestris]
c31467.graph_c0	--	--	Molecular Function: nucleic acid binding (GO:0003676);; Molecular Function: catalytic activity (GO:0003824);; Biological Process: DNA metabolic process (GO:0006259);;	--	--	--	--	--	Ty3/gypsy retrotransposon protein [Beta vulgaris subsp. vulgaris]
c12686.graph_c0	--	--	--	--	--	--	Development and cell death domain	B2 protein OS=Daucus carota (Wild carrot) PE=2 SV=1	PREDICTED: B2 protein [Beta vulgaris subsp. vulgaris]
c43992.graph_c0	--	--	Biological Process: primary metabolic process (GO:0044238);; Biological Process: cellular macromolecule metabolic process (GO:0044260);;	--	[K]	Transcription	--	Homeobox protein knotted-1-like 1 GN=F9M13.2 OS=Arabidopsis thaliana (Mouse-ear cress) PE=1 SV=1	PREDICTED: AP2-like ethylene-responsive transcription factor ANT [Beta vulgaris subsp. vulgaris]
c44907.graph_c0	--	--	Molecular Function: hydrolase activity (GO:0016787);;	--	--	--	Glycosyl hydrolases family 17	Glucan endo-1,3-beta-glucosidase {ECO:0000250|UniProtKB:Q03467} (Precursor) GN=VIT_06s0061g00120 OS=Vitis vinifera (Grape) PE=1 SV=2	PREDICTED: glucan endo-1,3-beta-glucosidase-like [Beta vulgaris subsp. vulgaris]
c11084.graph_c0	--	--	Biological Process: carbohydrate metabolic process (GO:0005975);; Molecular Function: cellulase activity (GO:0008810);; Biological Process: response to nematode (GO:0009624);;	--	--	--	Glycosyl hydrolase family 9	Endoglucanase 17 (Precursor) GN=At4g02290 OS=Arabidopsis thaliana (Mouse-ear cress) PE=2 SV=1	PREDICTED: endoglucanase 17 [Beta vulgaris subsp. vulgaris]
c31217.graph_c0	--	--	--	--	[K]	Transcription	Plus-3 domain;; GYF domain;; SWIB/MDM2 domain	Uncharacterized protein At5g08430 GN=At5g08430 OS=Arabidopsis thaliana (Mouse-ear cress) PE=1 SV=2	PREDICTED: uncharacterized protein At5g08430 isoform X2 [Beta vulgaris subsp. vulgaris]
c68029.graph_c0	--	--	Biological Process: MAPK cascade (GO:0000165);; Molecular Function: nucleotide binding (GO:0000166);; Molecular Function: protein serine/threonine kinase activity (GO:0004674);; Biological Process: protein phosphorylation (GO:0006468);; Molecular Function: ion binding (GO:0043167);;	--	--	--	Protein kinase domain	Putative wall-associated receptor kinase-like 11 (Precursor) GN=WAKL11 OS=Arabidopsis thaliana (Mouse-ear cress) PE=3 SV=2	PREDICTED: wall-associated receptor kinase 5-like [Beta vulgaris subsp. vulgaris]
c41970.graph_c0	[P]	Inorganic ion transport and metabolism	Molecular Function: voltage-gated chloride channel activity (GO:0005247);; Biological Process: chloride transport (GO:0006821);; Molecular Function: nitrate:hydrogen symporter activity (GO:0009671);; Cellular Component: plant-type vacuole membrane (GO:0009705);; Biological Process: response to nitrate (GO:0010167);; Biological Process: nitrate transport (GO:0015706);; Cellular Component: integral…	--	[P]	Inorganic ion transport and metabolism	Voltage gated chloride channel	Chloride channel protein CLC-b GN=MYF5.4 OS=Arabidopsis thaliana (Mouse-ear cress) PE=1 SV=1	PREDICTED: chloride channel protein CLC-b-like [Beta vulgaris subsp. vulgaris]
c37162.graph_c0	--	--	Molecular Function: DNA binding (GO:0003677);; Cellular Component: intracellular (GO:0005622);; Biological Process: regulation of transcription, DNA-templated (GO:0006355);;	--	--	--	zinc-binding in reverse transcriptase	--	PREDICTED: DNA polymerase epsilon subunit C [Beta vulgaris subsp. vulgaris]
c55369.graph_c0	--	--	--	--	[I]	Lipid transport and metabolism	Lipase (class 3)	--	PREDICTED: uncharacterized protein LOC104883777 [Beta vulgaris subsp. vulgaris]
c39884.graph_c0	[E]	Amino acid transport and metabolism	Molecular Function: 4-hydroxy-tetrahydrodipicolinate reductase (GO:0008839);; Biological Process: lysine biosynthetic process via diaminopimelate (GO:0009089);; Cellular Component: chloroplast stroma (GO:0009570);; Biological Process: photosynthetic electron transport in photosystem I (GO:0009773);; Biological Process: leaf morphogenesis (GO:0009965);; Biological Process: stomatal complex morphog…	K00215|1e-117|ath:AT5G52100|crr1	--	--	Protein of unknown function (DUF2930);; Dihydrodipicolinate reductase, N-terminus;; Dihydrodipicolinate reductase, C-terminus	Putative 4-hydroxy-tetrahydrodipicolinate reductase 3, chloroplastic (Precursor) GN=DAPB3 OS=Arabidopsis thaliana (Mouse-ear cress) PE=2 SV=1	PREDICTED: uncharacterized protein LOC104906447 [Beta vulgaris subsp. vulgaris]
c65617.graph_c0	--	--	--	K01285|3e-20|pop:POPTR_1119309|hypothetical protein	[OR]	--	Serine carboxypeptidase S28	Probable serine protease EDA2 (Precursor) GN=EDA2 OS=Arabidopsis thaliana (Mouse-ear cress) PE=2 SV=2	PREDICTED: lysosomal Pro-X carboxypeptidase-like [Beta vulgaris subsp. vulgaris]
c26811.graph_c0	--	--	--	--	[R]	General function prediction only	Ankyrin repeats (3 copies);; Ankyrin repeat;; Ankyrin repeats (many copies);; Domain of unknown function;; Ankyrin repeats (many copies);; Ankyrin repeat	Ankyrin repeat-containing protein At3g12360 GN=At3g12360 OS=Arabidopsis thaliana (Mouse-ear cress) PE=2 SV=1	PREDICTED: serine/threonine-protein phosphatase 6 regulatory ankyrin repeat subunit A-like isoform X1 [Beta vulgaris subsp. vulgaris]
c11229.graph_c0	[J]	Translation, ribosomal structure and biogenesis	Molecular Function: structural constituent of ribosome (GO:0003735);; Cellular Component: plasma membrane (GO:0005886);; Biological Process: translation (GO:0006412);; Cellular Component: cytosolic large ribosomal subunit (GO:0022625);;	K02920|5e-69|pop:POPTR_822944|hypothetical protein	[J]	Translation, ribosomal structure and biogenesis	Ribosomal protein L36e	60S ribosomal protein L36-2 GN=RPL36B OS=Arabidopsis thaliana (Mouse-ear cress) PE=2 SV=1	60S ribosomal protein L36 isoform 1 [Theobroma cacao]
c20622.graph_c0	--	--	--	--	--	--	--	Glycine-rich cell wall structural protein (Precursor) GN=At3g17050 OS=Arabidopsis thaliana (Mouse-ear cress) PE=3 SV=2	PREDICTED: glycine-rich cell wall structural protein-like [Beta vulgaris subsp. vulgaris]
c33190.graph_c1	--	--	--	--	--	--	--	--	PREDICTED: uncharacterized protein LOC104899739 [Beta vulgaris subsp. vulgaris]
c33533.graph_c0	[RTKL]	--	Molecular Function: transferase activity, transferring phosphorus-containing groups (GO:0016772);;	K08866|0.0|vvi:100262634|hypothetical protein LOC100262634	[D]	Cell cycle control, cell division, chromosome partitioning	Protein kinase domain;; Protein tyrosine kinase;; Protein kinase domain;; Protein tyrosine kinase	Mitogen-activated protein kinase kinase 2 GN=F27B13.50 OS=Arabidopsis thaliana (Mouse-ear cress) PE=1 SV=2	PREDICTED: serine/threonine-protein kinase mph1 isoform X2 [Beta vulgaris subsp. vulgaris]
c5944.graph_c1	--	--	Molecular Function: nucleotide binding (GO:0000166);; Molecular Function: protein serine/threonine kinase activity (GO:0004674);; Biological Process: transport (GO:0006810);; Biological Process: defense response (GO:0006952);; Biological Process: enzyme linked receptor protein signaling pathway (GO:0007167);; Biological Process: response to bacterium (GO:0009617);; Cellular Component: membrane (G…	K13420|5e-89|rcu:RCOM_0633880|leucine-rich repeat transmembrane protein kinase, putative (EC:1.3.1.74)	--	--	Leucine Rich repeats (2 copies);; Leucine Rich Repeat;; Leucine rich repeat;; Leucine Rich repeat;; Leucine rich repeat	LRR receptor-like serine/threonine-protein kinase FLS2 (Precursor) GN=FLS2 OS=Arabidopsis thaliana (Mouse-ear cress) PE=1 SV=1	PREDICTED: LRR receptor-like serine/threonine-protein kinase FLS2 [Beta vulgaris subsp. vulgaris]
c10672.graph_c0	--	--	--	--	--	--	Calmodulin binding protein-like	--	PREDICTED: uncharacterized protein LOC104893586 [Beta vulgaris subsp. vulgaris]
c65602.graph_c0	--	--	Molecular Function: iron ion binding (GO:0005506);; Molecular Function: linoleate 13S-lipoxygenase activity (GO:0016165);; Biological Process: oxylipin biosynthetic process (GO:0031408);; Biological Process: oxidation-reduction process (GO:0055114);;	--	--	--	Lipoxygenase	Linoleate 9S-lipoxygenase 6 (Fragment) GN=LOX1.6 OS=Solanum tuberosum (Potato) PE=1 SV=1	PREDICTED: probable linoleate 9S-lipoxygenase 5 [Beta vulgaris subsp. vulgaris]
c34198.graph_c0	--	--	--	--	[KR]	--	mTERF	--	PREDICTED: uncharacterized protein LOC104898168 [Beta vulgaris subsp. vulgaris]
c40338.graph_c0	[Z]	Cytoskeleton	Molecular Function: nucleotide binding (GO:0000166);; Cellular Component: microtubule associated complex (GO:0005875);; Biological Process: microtubule-based process (GO:0007017);; Biological Process: covalent chromatin modification (GO:0016569);; Biological Process: primary metabolic process (GO:0044238);; Biological Process: cellular macromolecule metabolic process (GO:0044260);; Biological Pro…	--	[Z]	Cytoskeleton	Kinesin motor domain	Armadillo repeat-containing kinesin-like protein 1 GN=F28P10.150 OS=Arabidopsis thaliana (Mouse-ear cress) PE=1 SV=2	PREDICTED: kinesin-like protein KIF3A [Beta vulgaris subsp. vulgaris]
c41658.graph_c0	[PR]	--	Biological Process: cell death (GO:0008219);; Cellular Component: chloroplast thylakoid (GO:0009534);; Cellular Component: chloroplast inner membrane (GO:0009706);; Biological Process: embryo development ending in seed dormancy (GO:0009793);; Biological Process: defense response to bacterium, incompatible interaction (GO:0009816);; Biological Process: leaf morphogenesis (GO:0009965);; Biological …	K13071|0.0|ath:AT3G44880|ACD1	--	--	Pheophorbide a oxygenase;; Rieske [2Fe-2S] domain	Pheophorbide a oxygenase, chloroplastic (Precursor) GN=F28D10_70 OS=Arabidopsis thaliana (Mouse-ear cress) PE=1 SV=1	PREDICTED: pheophorbide a oxygenase, chloroplastic [Beta vulgaris subsp. vulgaris]
c25774.graph_c0	--	--	--	--	--	--	Kinase binding protein CGI-121	--	PREDICTED: EKC/KEOPS complex subunit Tprkb [Beta vulgaris subsp. vulgaris]
c59183.graph_c0	--	--	--	--	--	--	--	--	hypothetical protein MIMGU_mgv1a018587mg, partial [Erythranthe guttata]
c30905.graph_c1	[J]	Translation, ribosomal structure and biogenesis	Molecular Function: aminopeptidase activity (GO:0004177);; Biological Process: proteolysis (GO:0006508);; Molecular Function: metalloexopeptidase activity (GO:0008235);; Biological Process: cellular process (GO:0009987);; Molecular Function: metal ion binding (GO:0046872);;	K01265|1e-142|rcu:RCOM_0705640|methionine aminopeptidase, putative (EC:3.4.11.18)	[O]	Posttranslational modification, protein turnover, chaperones	Allene oxide cyclase;; Metallopeptidase family M24;; Metallopeptidase family M24	Methionine aminopeptidase 1B, chloroplastic {ECO:0000255|HAMAP-Rule:MF_03174} (Precursor) GN=MAP1B OS=Arabidopsis thaliana (Mouse-ear cress) PE=2 SV=2	PREDICTED: methionine aminopeptidase 1B, chloroplastic-like [Beta vulgaris subsp. vulgaris]
c49324.graph_c0	[G]	Carbohydrate transport and metabolism	Molecular Function: glucose-6-phosphate isomerase activity (GO:0004347);; Cellular Component: cytoplasm (GO:0005737);; Biological Process: gluconeogenesis (GO:0006094);; Biological Process: glycolysis (GO:0006096);;	K01810|1e-150|ath:AT5G42740|glucose-6-phosphate isomerase, cytosolic (PGIC) (EC:5.3.1.9)	[G]	Carbohydrate transport and metabolism	Phosphoglucose isomerase	Glucose-6-phosphate isomerase, cytosolic GN=PGIC OS=Arabidopsis thaliana (Mouse-ear cress) PE=1 SV=1	Glucose-6-phosphate isomerase 2 [Neocallimastix frontalis]
c59676.graph_c0	--	--	--	--	--	--	--	--	PREDICTED: F-box protein At1g49990-like isoform X2 [Beta vulgaris subsp. vulgaris]
c40696.graph_c0	[D]	Cell cycle control, cell division, chromosome partitioning	--	K05868|1e-64|pop:POPTR_567093|hypothetical protein	[D]	Cell cycle control, cell division, chromosome partitioning	Cyclin, N-terminal domain	Putative cyclin-B3-1 GN=CYCB3-1 OS=Arabidopsis thaliana (Mouse-ear cress) PE=3 SV=2	PREDICTED: putative cyclin-B3-1 isoform X2 [Beta vulgaris subsp. vulgaris]
c68561.graph_c0	[L]	Replication, recombination and repair	Molecular Function: RNA binding (GO:0003723);; Molecular Function: RNA-directed DNA polymerase activity (GO:0003964);; Biological Process: RNA-dependent DNA replication (GO:0006278);;	--	[R]	General function prediction only	Reverse transcriptase (RNA-dependent DNA polymerase)	Uncharacterized mitochondrial protein AtMg00860 GN=AtMg00860 OS=Arabidopsis thaliana (Mouse-ear cress) PE=4 SV=1	PREDICTED: uncharacterized protein LOC104899140 [Beta vulgaris subsp. vulgaris]
c54666.graph_c0	--	--	Molecular Function: DNA binding (GO:0003677);; Molecular Function: peroxidase activity (GO:0004601);; Biological Process: DNA recombination (GO:0006310);; Molecular Function: electron carrier activity (GO:0009055);; Cellular Component: plastid (GO:0009536);; Biological Process: electron transport chain (GO:0022900);;	--	[R]	General function prediction only	Integrase core domain;; GAG-pre-integrase domain	Endonuclease OS=Nicotiana tabacum (Common tobacco) PE=2 SV=1	PREDICTED: copia protein isoform X2 [Beta vulgaris subsp. vulgaris]
c36632.graph_c1	[IQR]	--	Biological Process: metabolic process (GO:0008152);; Cellular Component: chloroplast (GO:0009507);; Molecular Function: oxidoreductase activity (GO:0016491);;	K00059|1e-107|vvi:100241750|hypothetical protein LOC100241750	[R]	General function prediction only	Enoyl-(Acyl carrier protein) reductase;; short chain dehydrogenase;; KR domain;; NADH(P)-binding;; NAD dependent epimerase/dehydratase family	Short-chain type dehydrogenase/reductase OS=Picea abies (Norway spruce) PE=2 SV=1	PREDICTED: short-chain type dehydrogenase/reductase-like [Beta vulgaris subsp. vulgaris]
c11557.graph_c0	--	--	--	--	--	--	MAC/Perforin domain	MACPF domain-containing protein At1g14780 GN=At1g14780 OS=Arabidopsis thaliana (Mouse-ear cress) PE=2 SV=1	PREDICTED: MACPF domain-containing protein At1g14780-like [Beta vulgaris subsp. vulgaris]
c42847.graph_c0	--	--	Cellular Component: integral component of membrane (GO:0016021);;	--	[U]	Intracellular trafficking, secretion, and vesicular transport	Endomembrane protein 70	Transmembrane 9 superfamily member 1 {ECO:0000305} (Precursor) OS=Arabidopsis thaliana (Mouse-ear cress) PE=1 SV=1	PREDICTED: transmembrane 9 superfamily member 1 [Beta vulgaris subsp. vulgaris]
c40891.graph_c0	--	--	Cellular Component: chloroplast thylakoid membrane (GO:0009535);; Biological Process: response to blue light (GO:0009637);; Biological Process: response to high light intensity (GO:0009644);; Cellular Component: photosystem II oxygen evolving complex (GO:0009654);; Biological Process: response to sucrose (GO:0009744);; Biological Process: response to red light (GO:0010114);; Biological Process: r…	K03541|2e-77|vvi:100243967|hypothetical protein LOC100243967	--	--	Photosystem II 10 kDa polypeptide PsbR	Photosystem II 10 kDa polypeptide, chloroplastic (Precursor) GN=PSBR OS=Spinacia oleracea (Spinach) PE=2 SV=1	RecName: Full=Photosystem II 10 kDa polypeptide, chloroplastic; Flags: Precursor [Spinacia oleracea]
c14481.graph_c0	--	--	--	--	--	--	Legume lectin domain;; Legume-like lectin family	Lectin (Precursor) GN=LE1 OS=Glycine max (Soybean) PE=1 SV=1	PREDICTED: probable L-type lectin-domain containing receptor kinase S.5 [Beta vulgaris subsp. vulgaris]
c12389.graph_c0	--	--	Molecular Function: structural molecule activity (GO:0005198);; Biological Process: intracellular protein transport (GO:0006886);; Biological Process: vesicle-mediated transport (GO:0016192);; Cellular Component: clathrin coat of trans-Golgi network vesicle (GO:0030130);; Cellular Component: clathrin coat of coated pit (GO:0030132);;	K04646|0.0|rcu:RCOM_0838580|clathrin heavy chain, putative	[U]	Intracellular trafficking, secretion, and vesicular transport	Region in Clathrin and VPS	Clathrin heavy chain 1 OS=Oryza sativa subsp. japonica (Rice) PE=3 SV=1	PREDICTED: clathrin heavy chain 1 [Beta vulgaris subsp. vulgaris]
c22885.graph_c1	--	--	--	--	[T]	Signal transduction mechanisms	NB-ARC domain	Probable disease resistance protein At1g15890 GN=At1g15890 OS=Arabidopsis thaliana (Mouse-ear cress) PE=3 SV=2	PREDICTED: disease resistance protein At4g27190-like isoform X2 [Beta vulgaris subsp. vulgaris]
c28705.graph_c0	--	--	--	--	--	--	--	--	PREDICTED: uncharacterized protein LOC104893020 [Beta vulgaris subsp. vulgaris]
c38162.graph_c0	[KLB]	--	Biological Process: RNA splicing, via endonucleolytic cleavage and ligation (GO:0000394);; Molecular Function: DNA binding (GO:0003677);; Molecular Function: sequence-specific DNA binding transcription factor activity (GO:0003700);; Cellular Component: nuclear euchromatin (GO:0005719);; Biological Process: DNA methylation (GO:0006306);; Biological Process: methylation-dependent chromatin silencin…	K09272|0.0|vvi:100249277|hypothetical protein LOC100249277	[KLB]	--	Structure-specific recognition protein (SSRP1);; HMG (high mobility group) box;; Histone chaperone Rttp106-like;; HMG-box domain	FACT complex subunit SSRP1 GN=SSRP1 OS=Vicia faba (Broad bean) PE=2 SV=1	PREDICTED: FACT complex subunit SSRP1 [Beta vulgaris subsp. vulgaris]
c20564.graph_c0	[H]	Coenzyme transport and metabolism	Biological Process: lipid transport (GO:0006869);;	--	[R]	General function prediction only	Domain of unknown function (DUF4110)	Nucleosome assembly protein 1;2 (Precursor) GN=F3P11.8 OS=Arabidopsis thaliana (Mouse-ear cress) PE=1 SV=1	PREDICTED: kelch domain-containing protein 4 [Beta vulgaris subsp. vulgaris]
c36948.graph_c0	[G]	Carbohydrate transport and metabolism	--	--	[G]	Carbohydrate transport and metabolism	Glycosyl hydrolase family 1;; Cellulase (glycosyl hydrolase family 5);; Glycosyl hydrolase family 1	Beta-glucosidase 18 (Precursor) OS=Oryza sativa subsp. japonica (Rice) PE=3 SV=2	PREDICTED: beta-glucosidase 18-like [Beta vulgaris subsp. vulgaris]
c34321.graph_c0	--	--	--	--	--	--	Plant mobile domain	Serine/threonine-protein phosphatase 7 long form homolog GN=At1g48120 OS=Arabidopsis thaliana (Mouse-ear cress) PE=2 SV=1	PREDICTED: uncharacterized protein LOC104891897 [Beta vulgaris subsp. vulgaris]
c62280.graph_c0	--	--	Molecular Function: nucleic acid binding (GO:0003676);; Molecular Function: zinc ion binding (GO:0008270);; Biological Process: DNA integration (GO:0015074);;	--	[R]	General function prediction only	gag-polypeptide of LTR copia-type;; Retrotransposon gag protein;; gag-polypeptide of LTR copia-type	--	PREDICTED: uncharacterized protein LOC104887387 [Beta vulgaris subsp. vulgaris]
c30362.graph_c0	--	--	--	--	--	--	--	--	PREDICTED: uncharacterized protein LOC104900431 [Beta vulgaris subsp. vulgaris]
c47446.graph_c0	--	--	Molecular Function: nutrient reservoir activity (GO:0045735);;	--	--	--	--	--	PREDICTED: glutelin type-B 5-like [Beta vulgaris subsp. vulgaris]
c77428.graph_c0	[TK]	--	Biological Process: transcription, DNA-templated (GO:0006351);; Biological Process: signal transduction (GO:0007165);; Cellular Component: plastid (GO:0009536);;	--	--	--	Response regulator receiver domain	Probable transcriptional regulator ycf27 GN=ycf27 OS=Porphyridium aerugineum PE=3 SV=1	PREDICTED: transcriptional regulatory protein PmrA-like [Cucumis sativus]
c34070.graph_c0	--	--	Molecular Function: ubiquitin-protein ligase activity (GO:0004842);; Biological Process: protein ubiquitination (GO:0016567);;	K06689|2e-91|pop:POPTR_738992|hypothetical protein	[O]	Posttranslational modification, protein turnover, chaperones	Ubiquitin-conjugating enzyme	Ubiquitin-conjugating enzyme E2-17 kDa OS=Solanum lycopersicum (Tomato) PE=2 SV=1	PREDICTED: ubiquitin-conjugating enzyme E2-17 kDa-like [Beta vulgaris subsp. vulgaris]
c26269.graph_c0	[GOU]	--	Cellular Component: integral component of membrane (GO:0016021);;	--	[GOU]	--	Triose-phosphate Transporter family	GDP-mannose transporter GONST1 GN=GONST1 OS=Arabidopsis thaliana (Mouse-ear cress) PE=1 SV=2	PREDICTED: putative UDP-sugar transporter DDB_G0278631 [Beta vulgaris subsp. vulgaris]
c12494.graph_c0	--	--	Cellular Component: extracellular region (GO:0005576);; Cellular Component: chloroplast (GO:0009507);; Biological Process: myo-inositol hexakisphosphate biosynthetic process (GO:0010264);; Molecular Function: antioxidant activity (GO:0016209);; Molecular Function: oxidoreductase activity (GO:0016491);; Biological Process: oxidation-reduction process (GO:0055114);;	--	[S]	Function unknown	AhpC/TSA antioxidant enzyme;; AhpC/TSA family	Thioredoxin-like protein AAED1, chloroplastic (Precursor) GN=At2g37240 OS=Arabidopsis thaliana (Mouse-ear cress) PE=2 SV=2	PREDICTED: thioredoxin-like protein AAED1, chloroplastic isoform X2 [Beta vulgaris subsp. vulgaris]
c30020.graph_c0	[R]	General function prediction only	Molecular Function: histone acetyltransferase activity (GO:0004402);; Cellular Component: nucleus (GO:0005634);; Biological Process: histone acetylation (GO:0016573);; Cellular Component: Cul4-RING ubiquitin ligase complex (GO:0080008);;	K10752|0.0|vvi:100265787|hypothetical protein LOC100265787	[B]	Chromatin structure and dynamics	WD domain, G-beta repeat;; Histone-binding protein RBBP4 or subunit C of CAF1 complex	WD-40 repeat-containing protein MSI2 GN=MSI2 OS=Arabidopsis thaliana (Mouse-ear cress) PE=2 SV=1	PREDICTED: WD-40 repeat-containing protein MSI2-like [Beta vulgaris subsp. vulgaris]
c25446.graph_c0	--	--	Cellular Component: Golgi membrane (GO:0000139);; Cellular Component: cis-Golgi network (GO:0005801);; Biological Process: ER to Golgi vesicle-mediated transport (GO:0006888);; Biological Process: membrane fusion (GO:0006944);; Biological Process: protein transport (GO:0015031);; Cellular Component: integral component of membrane (GO:0016021);;	K08495|2e-96|rcu:RCOM_0470970|golgi snare 11 protein, putative	[U]	Intracellular trafficking, secretion, and vesicular transport	Snare region anchored in the vesicle membrane C-terminus	Golgi SNAP receptor complex member 1-1 GN=GOS11 OS=Arabidopsis thaliana (Mouse-ear cress) PE=2 SV=1	PREDICTED: Golgi SNAP receptor complex member 1-1 [Beta vulgaris subsp. vulgaris]
c54683.graph_c0	[IQR]	--	Molecular Function: oxidoreductase activity (GO:0016491);; Biological Process: oxidation-reduction process (GO:0055114);;	--	[R]	General function prediction only	short chain dehydrogenase;; KR domain	Secoisolariciresinol dehydrogenase (Fragment) OS=Forsythia intermedia (Border forsythia) PE=1 SV=1	PREDICTED: secoisolariciresinol dehydrogenase-like [Beta vulgaris subsp. vulgaris]
c20147.graph_c0	--	--	Cellular Component: endosome (GO:0005768);; Cellular Component: vacuole (GO:0005773);; Cellular Component: Golgi apparatus (GO:0005794);; Cellular Component: trans-Golgi network (GO:0005802);;	--	[R]	General function prediction only	Carbohydrate-binding protein of the ER;; Di-glucose binding within endoplasmic reticulum;; Leucine Rich Repeat	Putative leucine-rich repeat receptor-like serine/threonine-protein kinase At2g14440 (Precursor) GN=At2g14440 OS=Arabidopsis thaliana (Mouse-ear cress) PE=3 SV=1	PREDICTED: putative leucine-rich repeat receptor-like serine/threonine-protein kinase At2g14440 [Beta vulgaris subsp. vulgaris]
c33093.graph_c0	--	--	--	--	--	--	NLI interacting factor-like phosphatase	--	PREDICTED: uncharacterized protein LOC104888880 [Beta vulgaris subsp. vulgaris]
c38842.graph_c0	[RTKL]	--	--	--	--	--	Protein kinase domain;; Legume lectin domain;; Protein tyrosine kinase	L-type lectin-domain containing receptor kinase IX.2 (Precursor) GN=LECRK92 OS=Arabidopsis thaliana (Mouse-ear cress) PE=2 SV=1	PREDICTED: probable L-type lectin-domain containing receptor kinase S.5 [Beta vulgaris subsp. vulgaris]
c26501.graph_c0	--	--	Cellular Component: integral component of membrane (GO:0016021);;	--	--	--	Family of unknown function (DUF716)	--	PREDICTED: transmembrane protein 45B-like [Beta vulgaris subsp. vulgaris]
c21485.graph_c0	--	--	--	--	[R]	General function prediction only	PPR repeat family;; PPR repeat;; PPR repeat	Putative pentatricopeptide repeat-containing protein At1g12700, mitochondrial (Precursor) GN=At1g12700 OS=Arabidopsis thaliana (Mouse-ear cress) PE=3 SV=1	PREDICTED: putative pentatricopeptide repeat-containing protein At1g12700, mitochondrial [Beta vulgaris subsp. vulgaris]
c20227.graph_c0	--	--	--	--	--	--	Transcriptional regulator of RNA polII, SAGA, subunit	--	PREDICTED: uncharacterized protein LOC104886538 [Beta vulgaris subsp. vulgaris]
c77499.graph_c0	--	--	--	--	[R]	General function prediction only	--	--	PREDICTED: uncharacterized protein LOC104901300 [Beta vulgaris subsp. vulgaris]
c52777.graph_c0	--	--	--	--	[T]	Signal transduction mechanisms	Wall-associated receptor kinase C-terminal;; Wall-associated receptor kinase galacturonan-binding	Uncharacterized protein At1g18380 (Precursor) GN=At1g18380 OS=Arabidopsis thaliana (Mouse-ear cress) PE=2 SV=1	PREDICTED: probable serine/threonine-protein kinase At1g18390 isoform X5 [Beta vulgaris subsp. vulgaris]
c30297.graph_c0	--	--	Molecular Function: ubiquitin-protein ligase activity (GO:0004842);; Molecular Function: zinc ion binding (GO:0008270);; Biological Process: response to high light intensity (GO:0009644);; Biological Process: sugar mediated signaling pathway (GO:0010182);; Biological Process: glucuronoxylan metabolic process (GO:0010413);; Biological Process: protein ubiquitination (GO:0016567);; Biological Proce…	--	[O]	Posttranslational modification, protein turnover, chaperones	Ring finger domain;; Zinc finger, C3HC4 type (RING finger);; Zinc finger, C3HC4 type (RING finger)	E3 ubiquitin-protein ligase SIS3 (Precursor) GN=SIS3 OS=Arabidopsis thaliana (Mouse-ear cress) PE=2 SV=2	PREDICTED: E3 ubiquitin-protein ligase SIS3 [Beta vulgaris subsp. vulgaris]
c30270.graph_c0	--	--	--	--	--	--	Protein of unknown function, DUF538	Uncharacterized protein At5g01610 GN=At5g01610 OS=Arabidopsis thaliana (Mouse-ear cress) PE=1 SV=1	PREDICTED: uncharacterized protein At5g01610 [Sesamum indicum]
c20461.graph_c0	--	--	Molecular Function: copper ion binding (GO:0005507);; Biological Process: lignin catabolic process (GO:0046274);; Cellular Component: apoplast (GO:0048046);; Molecular Function: hydroquinone:oxygen oxidoreductase activity (GO:0052716);; Biological Process: oxidation-reduction process (GO:0055114);;	--	[Q]	Secondary metabolites biosynthesis, transport and catabolism	--	Laccase-10 (Precursor) GN=OsJ_009911 OS=Oryza sativa subsp. japonica (Rice) PE=2 SV=1	hypothetical protein L484_002029 [Morus notabilis]
c30476.graph_c0	--	--	--	--	--	--	--	--	PREDICTED: uncharacterized protein LOC104210150 [Nicotiana sylvestris]
c49878.graph_c0	--	--	Cellular Component: mitochondrion (GO:0005739);; Molecular Function: metal ion binding (GO:0046872);;	K12619|6e-29|osa:4349826|Os11g0157000	[R]	General function prediction only	--	Endonuclease OS=Nicotiana tabacum (Common tobacco) PE=2 SV=1	hypothetical protein VITISV_028165 [Vitis vinifera]
c40210.graph_c0	--	--	--	--	--	--	--	--	PREDICTED: uncharacterized protein LOC104897473 [Beta vulgaris subsp. vulgaris]
c79081.graph_c0	--	--	Molecular Function: nucleic acid binding (GO:0003676);; Biological Process: DNA metabolic process (GO:0006259);;	--	[R]	General function prediction only	--	--	PREDICTED: uncharacterized protein LOC104894399 [Beta vulgaris subsp. vulgaris]
c40193.graph_c0	[L]	Replication, recombination and repair	--	--	[L]	Replication, recombination and repair	XPG I-region;; XPG N-terminal domain;; Response regulator receiver domain	Flap endonuclease GEN-like 1 GN=GEN1 OS=Arabidopsis thaliana (Mouse-ear cress) PE=2 SV=3	PREDICTED: flap endonuclease GEN-like 1 [Beta vulgaris subsp. vulgaris]
c31085.graph_c0	[I]	Lipid transport and metabolism	Biological Process: protein folding (GO:0006457);; Biological Process: protein targeting to mitochondrion (GO:0006626);; Biological Process: biosynthetic process (GO:0009058);; Biological Process: response to heat (GO:0009408);; Biological Process: response to high light intensity (GO:0009644);; Molecular Function: transferase activity (GO:0016740);; Biological Process: response to hydrogen perox…	--	[I]	Lipid transport and metabolism	Squalene/phytoene synthase	--	PREDICTED: NADH dehydrogenase (ubiquinone) complex I, assembly factor 6 [Beta vulgaris subsp. vulgaris]
c12320.graph_c0	[O]	Posttranslational modification, protein turnover, chaperones	Biological Process: metabolic process (GO:0008152);; Biological Process: response to abscisic acid (GO:0009737);; Molecular Function: amino acid binding (GO:0016597);;	--	--	--	ACT domain;; ACT domain;; ACT domain	ACT domain-containing protein ACR8 {ECO:0000305} OS=Arabidopsis thaliana (Mouse-ear cress) PE=2 SV=1	PREDICTED: uncharacterized protein LOC104892413 [Beta vulgaris subsp. vulgaris]
c34549.graph_c0	[P]	Inorganic ion transport and metabolism	Cellular Component: mitochondrion (GO:0005739);; Cellular Component: vacuolar membrane (GO:0005774);; Cellular Component: peroxisomal membrane (GO:0005778);; Biological Process: response to oxidative stress (GO:0006979);; Cellular Component: plasmodesma (GO:0009506);; Cellular Component: chloroplast envelope (GO:0009941);; Molecular Function: L-ascorbate peroxidase activity (GO:0016688);; Molecul…	K00434|1e-141|pop:POPTR_827053|L-ascorbate peroxidase (EC:1.11.1.11)	--	--	Peroxidase	L-ascorbate peroxidase 3, peroxisomal (Precursor) GN=M4E13.60 OS=Arabidopsis thaliana (Mouse-ear cress) PE=1 SV=1	PREDICTED: L-ascorbate peroxidase 3, peroxisomal-like [Beta vulgaris subsp. vulgaris]
c28974.graph_c0	--	--	--	--	--	--	--	--	hypothetical protein PITC_029160 [Penicillium italicum]
c32233.graph_c0	--	--	Biological Process: polysaccharide catabolic process (GO:0000272);; Molecular Function: hydrolase activity, hydrolyzing O-glycosyl compounds (GO:0004553);; Cellular Component: membrane (GO:0016020);;	--	--	--	Glycosyl hydrolase family 9	Endoglucanase 12 GN=OSJNBa0067K08.14 OS=Oryza sativa subsp. japonica (Rice) PE=2 SV=2	PREDICTED: endoglucanase 12-like [Beta vulgaris subsp. vulgaris]
c26823.graph_c0	[J]	Translation, ribosomal structure and biogenesis	Cellular Component: cytoplasm (GO:0005737);; Biological Process: translational termination (GO:0006415);; Molecular Function: translation release factor activity, codon specific (GO:0016149);;	K03265|0.0|rcu:RCOM_1438990|eukaryotic peptide chain release factor subunit, putative	[J]	Translation, ribosomal structure and biogenesis	eRF1 domain 2;; eRF1 domain 3;; eRF1 domain 1	Eukaryotic peptide chain release factor subunit 1-3 GN=ERF1-3 OS=Arabidopsis thaliana (Mouse-ear cress) PE=1 SV=1	PREDICTED: eukaryotic peptide chain release factor subunit 1-3-like [Beta vulgaris subsp. vulgaris]
c31910.graph_c0	--	--	Cellular Component: cell part (GO:0044464);;	--	--	--	--	--	PREDICTED: uncharacterized protein LOC104908807 [Beta vulgaris subsp. vulgaris]
c48044.graph_c0	--	--	Molecular Function: catalytic activity (GO:0003824);; Biological Process: cellular process (GO:0009987);; Biological Process: multicellular organismal process (GO:0032501);; Biological Process: single-organism developmental process (GO:0044767);; Biological Process: anatomical structure development (GO:0048856);;	--	[R]	General function prediction only	--	LRR receptor-like serine/threonine-protein kinase ERL1 {ECO:0000303|PubMed:14985254} (Precursor) OS=Arabidopsis thaliana (Mouse-ear cress) PE=1 SV=1	PREDICTED: piriformospora indica-insensitive protein 2 [Vitis vinifera]
c37870.graph_c0	--	--	--	--	[R]	General function prediction only	PPR repeat;; PPR repeat family;; PPR repeat;; Pentatricopeptide repeat domain;; Mitochondrial 28S ribosomal protein S27;; Tetratricopeptide repeat;; Tetratricopeptide repeat;; Evolutionarily conserved signalling intermediate in Toll pathway;; Tetratricopeptide repeat;; Domain of unknown function (DUF3368);; Replication factor C C-terminal domain	Pentatricopeptide repeat-containing protein At2g17140 GN=At2g17140 OS=Arabidopsis thaliana (Mouse-ear cress) PE=2 SV=1	PREDICTED: pentatricopeptide repeat-containing protein At2g17140 [Beta vulgaris subsp. vulgaris]
c37707.graph_c0	--	--	--	--	--	--	--	--	PREDICTED: uncharacterized protein LOC104893517 [Beta vulgaris subsp. vulgaris]
c20992.graph_c0	[G]	Carbohydrate transport and metabolism	Molecular Function: galactokinase activity (GO:0004335);; Molecular Function: ATP binding (GO:0005524);; Cellular Component: cytosol (GO:0005829);; Biological Process: galactose metabolic process (GO:0006012);; Biological Process: D-galacturonate metabolic process (GO:0046396);; Biological Process: carbohydrate phosphorylation (GO:0046835);; Molecular Function: galacturonokinase activity (GO:0047…	K00849|0.0|vvi:100261773|hypothetical protein LOC100261773	[G]	Carbohydrate transport and metabolism	GHMP kinases C terminal;; GHMP kinases N terminal domain;; Galactokinase galactose-binding signature	Galacturonokinase GN=GALAK OS=Arabidopsis thaliana (Mouse-ear cress) PE=1 SV=1	PREDICTED: galacturonokinase [Beta vulgaris subsp. vulgaris]
c20812.graph_c0	[L]	Replication, recombination and repair	Molecular Function: nucleic acid binding (GO:0003676);; Biological Process: tRNA modification (GO:0006400);; Biological Process: protein targeting to mitochondrion (GO:0006626);; Molecular Function: methyltransferase activity (GO:0008168);; Biological Process: methylation (GO:0032259);; Biological Process: 2-methylguanosine metabolic process (GO:0080180);;	--	[L]	Replication, recombination and repair	Putative RNA methylase family UPF0020;; Methyltransferase domain	--	PREDICTED: tRNA (guanine(10)-N2)-methyltransferase homolog [Beta vulgaris subsp. vulgaris]
c30913.graph_c0	--	--	Cellular Component: cell part (GO:0044464);;	--	--	--	--	Protein AIG2 GN=AIG2 OS=Arabidopsis thaliana (Mouse-ear cress) PE=2 SV=1	PREDICTED: protein AIG2-like [Beta vulgaris subsp. vulgaris]
c60070.graph_c0	--	--	--	--	--	--	Reverse transcriptase-like	--	PREDICTED: uncharacterized protein LOC104898417 [Beta vulgaris subsp. vulgaris]
c39531.graph_c0	--	--	--	--	--	--	--	--	PREDICTED: uncharacterized protein LOC104890641 [Beta vulgaris subsp. vulgaris]
c35361.graph_c0	[RTKL]	--	Molecular Function: protein serine/threonine kinase activity (GO:0004674);; Molecular Function: ATP binding (GO:0005524);; Biological Process: protein phosphorylation (GO:0006468);;	--	[T]	Signal transduction mechanisms	Protein tyrosine kinase;; Protein kinase domain	Proline-rich receptor-like protein kinase PERK9 GN=PERK9 OS=Arabidopsis thaliana (Mouse-ear cress) PE=2 SV=1	PREDICTED: serine/threonine-protein kinase CDL1 isoform X1 [Beta vulgaris subsp. vulgaris]
c29944.graph_c0	--	--	Molecular Function: organic cyclic compound binding (GO:0097159);; Molecular Function: heterocyclic compound binding (GO:1901363);;	--	--	--	--	--	RNA-directed DNA polymerase (Reverse transcriptase) [Medicago truncatula]
c79047.graph_c0	[H]	Coenzyme transport and metabolism	--	K02553|2e-11|ath:AT5G56260|dimethylmenaquinone methyltransferase family protein	--	--	--	Putative 4-hydroxy-4-methyl-2-oxoglutarate aldolase 3 GN=At5g56260 OS=Arabidopsis thaliana (Mouse-ear cress) PE=1 SV=1	PREDICTED: regulator of ribonuclease-like protein 3-like isoform X2 [Glycine max]
c74279.graph_c0	--	--	--	--	[R]	General function prediction only	--	--	PREDICTED: uncharacterized protein LOC104900062 [Beta vulgaris subsp. vulgaris]
c15330.graph_c0	--	--	--	K03165|1e-10|vvi:100248256|hypothetical protein LOC100248256	[L]	Replication, recombination and repair	--	DNA topoisomerase 3-alpha GN=OJ1123F12.5 OS=Oryza sativa subsp. japonica (Rice) PE=3 SV=1	PREDICTED: DNA topoisomerase 3-alpha isoform X1 [Beta vulgaris subsp. vulgaris]
c28443.graph_c0	--	--	--	--	--	--	--	--	PREDICTED: uncharacterized protein LOC104901845 [Beta vulgaris subsp. vulgaris]
c17964.graph_c0	--	--	--	--	--	--	Senescence regulator	--	PREDICTED: uncharacterized protein LOC104901003 [Beta vulgaris subsp. vulgaris]
c35611.graph_c0	[S]	Function unknown	Cellular Component: chloroplast thylakoid membrane (GO:0009535);; Cellular Component: chloroplast thylakoid lumen (GO:0009543);;	--	--	--	Pentapeptide repeats (8 copies)	Thylakoid lumenal protein At1g12250, chloroplastic (Precursor) GN=At1g12250 OS=Arabidopsis thaliana (Mouse-ear cress) PE=1 SV=1	PREDICTED: thylakoid lumenal protein At1g12250, chloroplastic [Beta vulgaris subsp. vulgaris]
c30193.graph_c1	--	--	Cellular Component: 1-phosphatidylinositol-4-phosphate 3-kinase, class IA complex (GO:0005943);; Cellular Component: chloroplast thylakoid (GO:0009534);;	--	--	--	--	--	PREDICTED: uncharacterized protein LOC104889021 [Beta vulgaris subsp. vulgaris]
c79269.graph_c0	[G]	Carbohydrate transport and metabolism	--	--	--	--	--	--	--
c42486.graph_c0	--	--	Molecular Function: zinc ion binding (GO:0008270);; Cellular Component: integral component of membrane (GO:0016021);; Molecular Function: cellulose synthase (UDP-forming) activity (GO:0016760);; Biological Process: cellulose biosynthetic process (GO:0030244);;	K10999|0.0|rcu:RCOM_0542950|Cellulose synthase A catalytic subunit 6 [UDP-forming], putative (EC:2.4.1.12)	--	--	Cellulose synthase	Cellulose synthase A catalytic subunit 4 [UDP-forming] GN=MRH10.14 OS=Arabidopsis thaliana (Mouse-ear cress) PE=1 SV=1	PREDICTED: cellulose synthase A catalytic subunit 4 [UDP-forming] [Beta vulgaris subsp. vulgaris]
c29002.graph_c0	--	--	--	--	--	--	Domain of unknown function (DUF3444);; ESCRT-II complex subunit	Vacuolar protein sorting-associated protein 25 GN=VPS25 OS=Arabidopsis thaliana (Mouse-ear cress) PE=1 SV=1	PREDICTED: uncharacterized protein LOC104893045 isoform X1 [Beta vulgaris subsp. vulgaris]
c39689.graph_c0	--	--	--	--	--	--	SBP domain;; Ankyrin repeats (many copies);; Ankyrin repeat;; Ankyrin repeat	Squamosa promoter-binding-like protein 12 GN=SPL12 OS=Arabidopsis thaliana (Mouse-ear cress) PE=1 SV=1	PREDICTED: squamosa promoter-binding-like protein 1 [Beta vulgaris subsp. vulgaris]
c40962.graph_c0	[J]	Translation, ribosomal structure and biogenesis	Molecular Function: structural constituent of ribosome (GO:0003735);; Biological Process: translation (GO:0006412);; Cellular Component: cytosolic small ribosomal subunit (GO:0022627);;	K02984|1e-164|pop:POPTR_922444|hypothetical protein	[J]	Translation, ribosomal structure and biogenesis	Ribosomal S3Ae family	40S ribosomal protein S3a {ECO:0000255|HAMAP-Rule:MF_03122} OS=Cicer arietinum (Chickpea) PE=2 SV=1	PREDICTED: 40S ribosomal protein S3a [Beta vulgaris subsp. vulgaris]
c28067.graph_c0	--	--	Molecular Function: nucleic acid binding (GO:0003676);; Molecular Function: catalytic activity (GO:0003824);; Biological Process: DNA metabolic process (GO:0006259);;	--	[R]	General function prediction only	--	--	PREDICTED: uncharacterized protein LOC100259557 [Vitis vinifera]
c33248.graph_c0	--	--	--	K09571|8e-10|pop:POPTR_711545|hypothetical protein	[O]	Posttranslational modification, protein turnover, chaperones	--	70 kDa peptidyl-prolyl isomerase GN=FKBP70 OS=Triticum aestivum (Wheat) PE=1 SV=1	PREDICTED: peptidyl-prolyl cis-trans isomerase FKBP62-like [Beta vulgaris subsp. vulgaris]
c50624.graph_c0	--	--	Molecular Function: hydrolase activity, acting on glycosyl bonds (GO:0016798);;	K07407|1e-17|rcu:RCOM_0612700|alpha-galactosidase/alpha-n-acetylgalactosaminidase, putative (EC:3.2.1.22)	[G]	Carbohydrate transport and metabolism	--	Alpha-galactosidase (Precursor) OS=Cyamopsis tetragonoloba (Guar) PE=1 SV=1	Alpha-galactosidase 2 [Theobroma cacao]
c61312.graph_c0	--	--	--	--	--	--	--	--	PREDICTED: uncharacterized protein LOC104901331 [Beta vulgaris subsp. vulgaris]
c44163.graph_c0	--	--	--	--	--	--	--	--	hypothetical protein CICLE_v10017260mg [Citrus clementina]
c73782.graph_c0	--	--	--	--	[PT]	--	--	Probable cyclic nucleotide-gated ion channel 17 GN=CNGC17 OS=Arabidopsis thaliana (Mouse-ear cress) PE=2 SV=1	PREDICTED: probable cyclic nucleotide-gated ion channel 17 isoform X2 [Beta vulgaris subsp. vulgaris]
c30771.graph_c0	--	--	Molecular Function: structural constituent of ribosome (GO:0003735);; Biological Process: translation (GO:0006412);; Molecular Function: rRNA binding (GO:0019843);; Cellular Component: cytosolic large ribosomal subunit (GO:0022625);; Molecular Function: metal ion binding (GO:0046872);;	K02922|3e-12|pop:POPTR_705727|hypothetical protein	[J]	Translation, ribosomal structure and biogenesis	--	60S ribosomal protein L37 (Fragment) GN=RPL37 OS=Solanum lycopersicum (Tomato) PE=2 SV=1	PREDICTED: 60S ribosomal protein L37-3 [Beta vulgaris subsp. vulgaris]
c58788.graph_c0	[J]	Translation, ribosomal structure and biogenesis	Molecular Function: structural constituent of ribosome (GO:0003735);; Cellular Component: nucleolus (GO:0005730);; Cellular Component: plasma membrane (GO:0005886);; Biological Process: translation (GO:0006412);; Cellular Component: cytosolic large ribosomal subunit (GO:0022625);;	K02885|9e-75|pop:POPTR_741007|hypothetical protein	[J]	Translation, ribosomal structure and biogenesis	Ribosomal protein L19e	60S ribosomal protein L19-3 GN=RPL19C OS=Arabidopsis thaliana (Mouse-ear cress) PE=2 SV=3	hypothetical protein AURANDRAFT_6947, partial [Aureococcus anophagefferens]
c27791.graph_c0	--	--	--	--	--	--	Early nodulin 93 ENOD93 protein	Early nodulin-93 OS=Glycine max (Soybean) PE=2 SV=1	PREDICTED: early nodulin-93-like [Beta vulgaris subsp. vulgaris]
c11122.graph_c0	--	--	--	--	--	--	Protein of unknown function (DUF581)	--	PREDICTED: uncharacterized protein LOC104905235 [Beta vulgaris subsp. vulgaris]
c42358.graph_c0	--	--	--	--	--	--	BTB/POZ domain;; BTB And C-terminal Kelch	BTB/POZ domain-containing protein POB1 GN=POB1 OS=Arabidopsis thaliana (Mouse-ear cress) PE=2 SV=2	PREDICTED: BTB/POZ domain-containing protein POB1-like [Beta vulgaris subsp. vulgaris]
c40486.graph_c0	--	--	--	--	[R]	General function prediction only	--	Pentatricopeptide repeat-containing protein At4g19191, mitochondrial (Precursor) GN=PCMP-E1 OS=Arabidopsis thaliana (Mouse-ear cress) PE=2 SV=1	PREDICTED: pentatricopeptide repeat-containing protein At4g19191, mitochondrial [Beta vulgaris subsp. vulgaris]
c55880.graph_c0	--	--	Molecular Function: cysteine-type peptidase activity (GO:0008234);;	--	[DO]	--	Caspase domain	Metacaspase-9 subunit p10 GN=F21E1.120 OS=Arabidopsis thaliana (Mouse-ear cress) PE=1 SV=1	PREDICTED: metacaspase-9-like isoform X1 [Beta vulgaris subsp. vulgaris]
c39797.graph_c0	--	--	--	--	--	--	--	--	PREDICTED: uncharacterized protein LOC104901309 [Beta vulgaris subsp. vulgaris]
c36873.graph_c0	--	--	--	--	--	--	Helix-hairpin-helix domain;; Helix-hairpin-helix motif	--	PREDICTED: uncharacterized protein LOC104892716 [Beta vulgaris subsp. vulgaris]
c38642.graph_c0	--	--	--	--	[P]	Inorganic ion transport and metabolism	Tesmin/TSO1-like CXC domain, cysteine-rich domain	Protein tesmin/TSO1-like CXC 5 GN=TCX5 OS=Arabidopsis thaliana (Mouse-ear cress) PE=1 SV=1	PREDICTED: protein tesmin/TSO1-like CXC 5 [Beta vulgaris subsp. vulgaris]
c18222.graph_c0	--	--	--	--	[OR]	--	Ubiquitin family;; Ubiquitin-2 like Rad60 SUMO-like;; Ubiquitin-like domain;; Ubiquitin-2 like Rad60 SUMO-like;; Protein of unknown function (DUF2870)	NEDD8-like protein RUB2 (Precursor) GN=T20F21.24 OS=Arabidopsis thaliana (Mouse-ear cress) PE=1 SV=3	polyubiquitin, partial [Gladiolus grandiflorus]
c11301.graph_c0	[P]	Inorganic ion transport and metabolism	Molecular Function: superoxide dismutase activity (GO:0004784);; Biological Process: superoxide metabolic process (GO:0006801);; Molecular Function: metal ion binding (GO:0046872);; Biological Process: oxidation-reduction process (GO:0055114);;	K04564|1e-140|pop:POPTR_253123|iron superoxide dismutase (EC:1.15.1.1)	[P]	Inorganic ion transport and metabolism	Iron/manganese superoxide dismutases, C-terminal domain;; Iron/manganese superoxide dismutases, alpha-hairpin domain	Superoxide dismutase [Fe] 2, chloroplastic (Precursor) GN=MWD22.4 OS=Arabidopsis thaliana (Mouse-ear cress) PE=1 SV=1	PREDICTED: superoxide dismutase [Fe], chloroplastic-like [Beta vulgaris subsp. vulgaris]
c29901.graph_c0	--	--	Molecular Function: protein dimerization activity (GO:0046983);;	--	--	--	Helix-loop-helix DNA-binding domain	Transcription factor bHLH62 GN=F21O3.5 OS=Arabidopsis thaliana (Mouse-ear cress) PE=2 SV=1	PREDICTED: transcription factor bHLH78 [Beta vulgaris subsp. vulgaris]
c18361.graph_c0	--	--	--	--	[U]	Intracellular trafficking, secretion, and vesicular transport	--	MAR-binding filament-like protein 1-1 GN=MFP1-1 OS=Nicotiana tabacum (Common tobacco) PE=2 SV=1	PREDICTED: ankycorbin-like [Beta vulgaris subsp. vulgaris]
c38640.graph_c1	[RTKL]	--	Molecular Function: protein serine/threonine kinase activity (GO:0004674);; Molecular Function: ATP binding (GO:0005524);; Biological Process: protein phosphorylation (GO:0006468);;	--	[RT]	--	Protein kinase domain;; Protein tyrosine kinase;; Protein kinase domain;; Protein tyrosine kinase;; Protein kinase C terminal domain	Serine/threonine-protein kinase AtPK2/AtPK19 GN=F17O14.19 OS=Arabidopsis thaliana (Mouse-ear cress) PE=1 SV=2	PREDICTED: serine/threonine-protein kinase AtPK2/AtPK19-like [Beta vulgaris subsp. vulgaris]
c9462.graph_c0	--	--	Molecular Function: nucleic acid binding (GO:0003676);; Molecular Function: ubiquitin-protein ligase activity (GO:0004842);; Cellular Component: intracellular (GO:0005622);; Molecular Function: zinc ion binding (GO:0008270);; Biological Process: protein ubiquitination (GO:0016567);;	K11968|2e-56|vvi:100257000|hypothetical protein LOC100257000	[O]	Posttranslational modification, protein turnover, chaperones	--	Probable E3 ubiquitin-protein ligase ARI7 GN=ARI7 OS=Arabidopsis thaliana (Mouse-ear cress) PE=2 SV=1	PREDICTED: probable E3 ubiquitin-protein ligase ARI5 [Beta vulgaris subsp. vulgaris]
c18474.graph_c0	--	--	--	--	[R]	General function prediction only	Reverse transcriptase (RNA-dependent DNA polymerase)	--	reverse transcriptase precursor, putative [Phytophthora infestans]
c58773.graph_c0	--	--	--	--	[T]	Signal transduction mechanisms	NB-ARC domain	Disease resistance protein RGA2 GN=RGA2 OS=Solanum bulbocastanum (Wild potato) PE=1 SV=1	PREDICTED: putative disease resistance protein RGA3 [Beta vulgaris subsp. vulgaris]
c54559.graph_c0	--	--	--	--	[L]	Replication, recombination and repair	DDE superfamily endonuclease;; Plant transposon protein	--	PREDICTED: uncharacterized protein LOC104890504 isoform X1 [Beta vulgaris subsp. vulgaris]
c30092.graph_c0	--	--	Cellular Component: chloroplast (GO:0009507);;	--	--	--	--	--	PREDICTED: uncharacterized protein LOC104887029 [Beta vulgaris subsp. vulgaris]
c40105.graph_c0	[C]	Energy production and conversion	Cellular Component: mitochondrial proton-transporting ATP synthase complex, catalytic core F(1) (GO:0000275);; Molecular Function: ATP binding (GO:0005524);; Biological Process: ATP synthesis coupled proton transport (GO:0015986);; Biological Process: ATP hydrolysis coupled proton transport (GO:0015991);; Cellular Component: integral component of membrane (GO:0016021);; Biological Process: electr…	K02132|0.0|osa:6450183|atp1, OrsajM_p50	[C]	Energy production and conversion	ATP synthase alpha/beta family, nucleotide-binding domain;; ATP synthase alpha/beta chain, C terminal domain;; ATP synthase alpha/beta family, beta-barrel domain;; HAS barrel domain	ATP synthase subunit alpha, mitochondrial GN=ATPA OS=Beta vulgaris (Sugar beet) PE=3 SV=1	atp1 gene product (mitochondrion) [Beta vulgaris subsp. vulgaris]
c31004.graph_c0	[H]	Coenzyme transport and metabolism	Molecular Function: hydroxymethylbilane synthase activity (GO:0004418);; Biological Process: pentose-phosphate shunt (GO:0006098);; Biological Process: rRNA processing (GO:0006364);; Biological Process: ubiquinone biosynthetic process (GO:0006744);; Biological Process: aromatic amino acid family biosynthetic process (GO:0009073);; Biological Process: response to cold (GO:0009409);; Cellular Compo…	K01749|0.0|rcu:RCOM_1534040|porphobilinogen deaminase, putative (EC:2.5.1.61)	[H]	Coenzyme transport and metabolism	Porphobilinogen deaminase, dipyromethane cofactor binding domain;; Porphobilinogen deaminase, C-terminal domain	Porphobilinogen deaminase, chloroplastic (Precursor) GN=HEMC OS=Pisum sativum (Garden pea) PE=1 SV=1	PREDICTED: porphobilinogen deaminase, chloroplastic [Beta vulgaris subsp. vulgaris]
c35452.graph_c0	--	--	--	--	--	--	--	--	PREDICTED: uncharacterized protein LOC104895445 isoform X1 [Beta vulgaris subsp. vulgaris]
c20513.graph_c0	--	--	--	--	--	--	--	--	PREDICTED: uncharacterized protein LOC104898613 [Beta vulgaris subsp. vulgaris]
c23211.graph_c0	[L]	Replication, recombination and repair	Molecular Function: DNA primase activity (GO:0003896);; Biological Process: DNA replication, synthesis of RNA primer (GO:0006269);; Biological Process: DNA methylation (GO:0006306);; Biological Process: cell proliferation (GO:0008283);; Biological Process: histone H3-K9 methylation (GO:0051567);; Cellular Component: primosome complex (GO:1990077);;	K02684|0.0|vvi:100260326|hypothetical protein LOC100260326	[L]	Replication, recombination and repair	Eukaryotic and archaeal DNA primase small subunit	--	PREDICTED: DNA primase small subunit [Beta vulgaris subsp. vulgaris]
c12015.graph_c0	--	--	--	--	[R]	General function prediction only	C2 domain	Elicitor-responsive protein 3 OS=Oryza sativa subsp. japonica (Rice) PE=2 SV=1	PREDICTED: elicitor-responsive protein 3-like [Beta vulgaris subsp. vulgaris]
c31529.graph_c0	--	--	--	--	[S]	Function unknown	Neurochondrin	--	PREDICTED: neurochondrin isoform X1 [Beta vulgaris subsp. vulgaris]
c44964.graph_c0	--	--	Biological Process: cellular process (GO:0009987);; Molecular Function: kinase activity (GO:0016301);;	--	--	--	D-mannose binding lectin;; S-locus glycoprotein family	Putative receptor protein kinase ZmPK1 (Precursor) GN=PK1 OS=Zea mays (Maize) PE=2 SV=2	PREDICTED: G-type lectin S-receptor-like serine/threonine-protein kinase At1g34300 [Beta vulgaris subsp. vulgaris]
c18939.graph_c0	[R]	General function prediction only	--	--	[I]	Lipid transport and metabolism	Alpha/beta hydrolase family;; alpha/beta hydrolase fold;; Alpha/beta hydrolase family	--	PREDICTED: bifunctional epoxide hydrolase 2-like [Beta vulgaris subsp. vulgaris]
c60843.graph_c0	[E]	Amino acid transport and metabolism	Cellular Component: intracellular (GO:0005622);; Biological Process: metabolic process (GO:0008152);; Molecular Function: transaminase activity (GO:0008483);;	K00813|8e-22|ppp:PHYPADRAFT_102134|hypothetical protein	[E]	Amino acid transport and metabolism	Aminotransferase class I and II	Aspartate aminotransferase, cytoplasmic OS=Oryza sativa subsp. japonica (Rice) PE=2 SV=1	unnamed protein product [Pneumocystis jirovecii]
c36990.graph_c0	--	--	--	--	--	--	--	--	PREDICTED: uncharacterized protein LOC104885220 isoform X2 [Beta vulgaris subsp. vulgaris]
c36934.graph_c0	[G]	Carbohydrate transport and metabolism	Molecular Function: transporter activity (GO:0005215);; Biological Process: transport (GO:0006810);; Cellular Component: integral component of membrane (GO:0016021);;	--	[G]	Carbohydrate transport and metabolism	Major intrinsic protein;; 2Fe-2S iron-sulfur cluster binding domain	Aquaporin TIP2-1, N-terminally processed GN=TIP2-1 OS=Arabidopsis thaliana (Mouse-ear cress) PE=1 SV=2	PREDICTED: aquaporin TIP2-1 [Beta vulgaris subsp. vulgaris]
c1548.graph_c0	--	--	Molecular Function: binding (GO:0005488);;	--	[R]	General function prediction only	Domain of unknown function (DUF4219)	--	PREDICTED: uncharacterized protein LOC104227255 [Nicotiana sylvestris]
c64467.graph_c0	--	--	--	--	--	--	--	GDSL esterase/lipase EXL3 (Precursor) GN=EXL3 OS=Arabidopsis thaliana (Mouse-ear cress) PE=2 SV=1	PREDICTED: GDSL esterase/lipase EXL3-like isoform X1 [Beta vulgaris subsp. vulgaris]
c10584.graph_c0	--	--	Cellular Component: intracellular (GO:0005622);; Molecular Function: methyltransferase activity (GO:0008168);; Molecular Function: zinc ion binding (GO:0008270);; Biological Process: methylation (GO:0032259);;	--	--	--	PLATZ transcription factor	--	PREDICTED: uncharacterized protein LOC104901849 [Beta vulgaris subsp. vulgaris]
c69642.graph_c0	[L]	Replication, recombination and repair	Molecular Function: RNA binding (GO:0003723);; Molecular Function: RNA-directed DNA polymerase activity (GO:0003964);; Molecular Function: RNA-DNA hybrid ribonuclease activity (GO:0004523);; Biological Process: RNA-dependent DNA replication (GO:0006278);; Biological Process: DNA integration (GO:0015074);;	--	[R]	General function prediction only	--	--	hypothetical protein VITISV_024979 [Vitis vinifera]
c45009.graph_c0	--	--	Molecular Function: hydrolase activity, acting on glycosyl bonds (GO:0016798);;	--	--	--	Glycosyl hydrolases family 28	Polygalacturonase (Precursor) OS=Actinidia deliciosa (Kiwi) PE=2 SV=1	PREDICTED: polygalacturonase QRT2 [Beta vulgaris subsp. vulgaris]
c11742.graph_c0	[R]	General function prediction only	Molecular Function: nucleotide binding (GO:0000166);; Molecular Function: nucleic acid binding (GO:0003676);; Cellular Component: ribonucleoprotein complex (GO:0030529);;	K14411|0.0|vvi:100246008|hypothetical protein LOC100246008	[A]	RNA processing and modification	RNA recognition motif. (a.k.a. RRM, RBD, or RNP domain);; RNA recognition motif (a.k.a. RRM, RBD, or RNP domain);; RNA recognition motif. (a.k.a. RRM, RBD, or RNP domain)	Heterogeneous nuclear ribonucleoprotein 1 GN=RNP1 OS=Arabidopsis thaliana (Mouse-ear cress) PE=1 SV=1	PREDICTED: heterogeneous nuclear ribonucleoprotein 1 [Beta vulgaris subsp. vulgaris]
c39513.graph_c0	--	--	--	--	--	--	--	--	PREDICTED: uncharacterized protein LOC104890896 [Beta vulgaris subsp. vulgaris]
c17226.graph_c0	--	--	--	--	--	--	--	--	PREDICTED: uncharacterized protein LOC104898171 [Beta vulgaris subsp. vulgaris]
c38543.graph_c0	[F]	Nucleotide transport and metabolism	Molecular Function: ribonucleoside-diphosphate reductase activity, thioredoxin disulfide as acceptor (GO:0004748);; Molecular Function: ATP binding (GO:0005524);; Cellular Component: ribonucleoside-diphosphate reductase complex (GO:0005971);; Biological Process: gluconeogenesis (GO:0006094);; Biological Process: DNA-dependent DNA replication (GO:0006261);; Biological Process: cytoskeleton organiz…	K10807|0.0|vvi:100261117|hypothetical protein LOC100261117	[F]	Nucleotide transport and metabolism	Ribonucleotide reductase, barrel domain;; Ribonucleotide reductase, all-alpha domain;; ATP cone domain	Ribonucleoside-diphosphate reductase large subunit {ECO:0000303|PubMed:10542051} OS=Arabidopsis thaliana (Mouse-ear cress) PE=1 SV=1	PREDICTED: ribonucleoside-diphosphate reductase large subunit [Beta vulgaris subsp. vulgaris]
c58447.graph_c0	--	--	--	--	[R]	General function prediction only	--	--	PREDICTED: uncharacterized protein LOC104901057 [Beta vulgaris subsp. vulgaris]
c41757.graph_c0	[R]	General function prediction only	--	K09613|0.0|vvi:100265887|similar to JAB	[OT]	--	JAB1/Mov34/MPN/PAD-1 ubiquitin protease	COP9 signalosome complex subunit 5b GN=F19G10.12 OS=Arabidopsis thaliana (Mouse-ear cress) PE=1 SV=2	PREDICTED: COP9 signalosome complex subunit 5b-like [Beta vulgaris subsp. vulgaris]
c25773.graph_c0	[Q]	Secondary metabolites biosynthesis, transport and catabolism	Cellular Component: chloroplast (GO:0009507);;	--	[R]	General function prediction only	Dienelactone hydrolase family;; Alpha/beta hydrolase family;; Alpha/beta hydrolase family;; Prolyl oligopeptidase family;; TAP-like protein;; alpha/beta hydrolase fold;; Serine hydrolase (FSH1)	--	PREDICTED: carboxymethylenebutenolidase homolog isoform X1 [Beta vulgaris subsp. vulgaris]
c61274.graph_c0	--	--	--	--	--	--	--	--	PREDICTED: zinc finger MYM-type protein 1-like [Beta vulgaris subsp. vulgaris]
c36886.graph_c0	--	--	--	--	--	--	--	--	PREDICTED: uncharacterized protein LOC104908703 [Beta vulgaris subsp. vulgaris]
c32924.graph_c0	--	--	--	--	--	--	--	--	uncharacterized protein CPUR_02934 [Claviceps purpurea 20.1]
c40000.graph_c0	--	--	Molecular Function: binding (GO:0005488);; Molecular Function: oxidoreductase activity (GO:0016491);;	--	--	--	Peroxidase;; Protein of unknown function (DUF632)	Peroxidase 63 (Precursor) OS=Arabidopsis thaliana (Mouse-ear cress) PE=2 SV=1	PREDICTED: uncharacterized protein LOC104891002 [Beta vulgaris subsp. vulgaris]
c42586.graph_c0	[U]	Intracellular trafficking, secretion, and vesicular transport	Biological Process: transcription, DNA-templated (GO:0006351);; Cellular Component: chloroplast (GO:0009507);; Biological Process: plastid organization (GO:0009657);; Cellular Component: integral component of membrane (GO:0016021);; Biological Process: regulation of cellular metabolic process (GO:0031323);; Biological Process: ncRNA metabolic process (GO:0034660);; Cellular Component: thylakoid m…	K03118|2e-36|vvi:100259443|hypothetical protein LOC100259443	--	--	Sec-independent protein translocase protein (TatC)	Sec-independent protein translocase protein TATC, chloroplastic (Precursor) GN=TATC OS=Pisum sativum (Garden pea) PE=1 SV=1	PREDICTED: sec-independent protein translocase protein TATC, chloroplastic-like [Beta vulgaris subsp. vulgaris]
c36702.graph_c0	[R]	General function prediction only	Molecular Function: calmodulin binding (GO:0005516);; Molecular Function: ATP binding (GO:0005524);; Cellular Component: mitochondrion (GO:0005739);; Cellular Component: chloroplast (GO:0009507);;	--	[R]	General function prediction only	AFG1-like ATPase;; Bacterial dnaA protein	--	PREDICTED: lactation elevated protein 1 isoform X1 [Beta vulgaris subsp. vulgaris]
c66795.graph_c0	--	--	Molecular Function: nucleic acid binding (GO:0003676);; Molecular Function: zinc ion binding (GO:0008270);; Biological Process: DNA integration (GO:0015074);;	--	[R]	General function prediction only	GAG-pre-integrase domain	Endonuclease OS=Nicotiana tabacum (Common tobacco) PE=2 SV=1	putative gag/pol polyprotein [Phaseolus vulgaris]
c9078.graph_c0	[L]	Replication, recombination and repair	Molecular Function: RNA binding (GO:0003723);; Molecular Function: RNA-directed DNA polymerase activity (GO:0003964);; Biological Process: RNA-dependent DNA replication (GO:0006278);; Molecular Function: zinc ion binding (GO:0008270);; Biological Process: DNA integration (GO:0015074);;	--	[R]	General function prediction only	--	RNA-directed DNA polymerase homolog OS=Oenothera berteroana (Bertero&apos;s evening primrose) PE=4 SV=1	PREDICTED: uncharacterized protein LOC104885391 [Beta vulgaris subsp. vulgaris]
c36793.graph_c0	[RTKL]	--	Molecular Function: nucleotide binding (GO:0000166);; Molecular Function: protein kinase activity (GO:0004672);;	--	--	--	Protein tyrosine kinase;; Protein kinase domain;; Protein kinase domain;; Protein tyrosine kinase	Cysteine-rich receptor-like protein kinase 10 (Precursor) GN=F21P8.70 OS=Arabidopsis thaliana (Mouse-ear cress) PE=1 SV=3	PREDICTED: cysteine-rich receptor-like protein kinase 10 [Beta vulgaris subsp. vulgaris]
c80574.graph_c0	[R]	General function prediction only	--	--	--	--	--	--	--
c24031.graph_c0	[M]	Cell wall/membrane/envelope biogenesis	--	--	[M]	Cell wall/membrane/envelope biogenesis	Mechanosensitive ion channel	Mechanosensitive ion channel protein 10 GN=MSL10 OS=Arabidopsis thaliana (Mouse-ear cress) PE=1 SV=1	PREDICTED: mechanosensitive ion channel protein 10-like [Beta vulgaris subsp. vulgaris]
c12359.graph_c0	--	--	Cellular Component: vacuole (GO:0005773);;	--	[S]	Function unknown	Glycosyltransferase family 92	--	PREDICTED: uncharacterized protein LOC104898790 [Beta vulgaris subsp. vulgaris]
c11006.graph_c0	[S]	Function unknown	Molecular Function: DNA binding (GO:0003677);; Cellular Component: nucleus (GO:0005634);; Biological Process: protein N-linked glycosylation (GO:0006487);; Biological Process: protein targeting to vacuole (GO:0006623);; Biological Process: membrane fusion (GO:0006944);; Biological Process: systemic acquired resistance (GO:0009627);; Biological Process: salicylic acid biosynthetic process (GO:0009…	--	[S]	Function unknown	TFIIS helical bundle-like domain	--	PREDICTED: protein IWS1 homolog [Beta vulgaris subsp. vulgaris]
c10987.graph_c0	--	--	Biological Process: ncRNA metabolic process (GO:0034660);; Biological Process: single-organism cellular process (GO:0044763);; Biological Process: cellular component organization or biogenesis (GO:0071840);;	--	[R]	General function prediction only	PPR repeat;; PPR repeat family;; Pentatricopeptide repeat domain;; Tetratricopeptide repeat;; Tetratricopeptide repeat;; TPR repeat;; Tetratricopeptide repeat;; Tetratricopeptide repeat	Pentatricopeptide repeat-containing protein At1g02150 GN=At1g02150 OS=Arabidopsis thaliana (Mouse-ear cress) PE=2 SV=2	PREDICTED: pentatricopeptide repeat-containing protein At1g02150 [Beta vulgaris subsp. vulgaris]
c12025.graph_c0	--	--	Cellular Component: intracellular membrane-bounded organelle (GO:0043231);; Cellular Component: cytoplasmic part (GO:0044444);;	--	--	--	Protein of unknown function (DUF2921)	--	PREDICTED: uncharacterized protein LOC104904626 [Beta vulgaris subsp. vulgaris]
c40667.graph_c0	--	--	--	--	[R]	General function prediction only	PPR repeat family;; PPR repeat;; PPR repeat;; Pentatricopeptide repeat domain	Pentatricopeptide repeat-containing protein At4g20770 GN=PCMP-E35 OS=Arabidopsis thaliana (Mouse-ear cress) PE=3 SV=2	PREDICTED: pentatricopeptide repeat-containing protein At4g20770 [Beta vulgaris subsp. vulgaris]
c32281.graph_c0	--	--	--	--	--	--	Protein of unknown function, DUF617	Protein MIZU-KUSSEI 1 GN=MIZ1 OS=Arabidopsis thaliana (Mouse-ear cress) PE=1 SV=1	PREDICTED: protein MIZU-KUSSEI 1 [Beta vulgaris subsp. vulgaris]
c10471.graph_c1	--	--	--	--	--	--	--	--	PREDICTED: uncharacterized protein LOC104899934 [Beta vulgaris subsp. vulgaris]
c60730.graph_c0	--	--	Molecular Function: nucleic acid binding (GO:0003676);; Molecular Function: zinc ion binding (GO:0008270);; Biological Process: DNA integration (GO:0015074);; Molecular Function: oxidoreductase activity (GO:0016491);; Biological Process: oxidation-reduction process (GO:0055114);;	--	[R]	General function prediction only	--	Uncharacterized mitochondrial protein AtMg00810 GN=AtMg00810 OS=Arabidopsis thaliana (Mouse-ear cress) PE=4 SV=1	PREDICTED: putative receptor-like protein kinase At4g00960 [Beta vulgaris subsp. vulgaris]
c36616.graph_c0	--	--	Biological Process: transcription, DNA-templated (GO:0006351);;	--	--	--	GRAS domain family	Scarecrow-like protein 3 GN=SCL3 OS=Arabidopsis thaliana (Mouse-ear cress) PE=2 SV=1	unnamed protein product [Vitis vinifera]
c39408.graph_c0	--	--	--	--	--	--	--	--	PREDICTED: uncharacterized protein LOC104889943 [Beta vulgaris subsp. vulgaris]
c35488.graph_c1	--	--	--	--	--	--	Cotton fibre expressed protein	--	PREDICTED: uncharacterized protein LOC104897127 [Beta vulgaris subsp. vulgaris]
c79429.graph_c0	--	--	--	--	[R]	General function prediction only	--	--	hypothetical protein CHLNCDRAFT_138356 [Chlorella variabilis]
c29713.graph_c0	--	--	--	--	--	--	--	--	PREDICTED: agamous-like MADS-box protein AGL62 [Nicotiana tomentosiformis]
c60971.graph_c0	--	--	--	--	--	--	Reverse transcriptase-like	--	PREDICTED: uncharacterized protein LOC104883564 [Beta vulgaris subsp. vulgaris]
c66701.graph_c0	[C]	Energy production and conversion	Molecular Function: iron ion binding (GO:0005506);; Biological Process: transport (GO:0006810);; Molecular Function: NADH dehydrogenase (ubiquinone) activity (GO:0008137);; Cellular Component: chloroplast thylakoid membrane (GO:0009535);; Biological Process: photosynthesis, light reaction (GO:0019684);; Molecular Function: quinone binding (GO:0048038);; Molecular Function: 4 iron, 4 sulfur cluste…	--	[C]	Energy production and conversion	--	NAD(P)H-quinone oxidoreductase subunit K, chloroplastic {ECO:0000255|HAMAP-Rule:MF_01356} OS=Spinacia oleracea (Spinach) PE=3 SV=3	NADH dehydrogenase subunit K, partial (chloroplast) [Didierea madagascariensis]
c42826.graph_c0	[C]	Energy production and conversion	Biological Process: malate metabolic process (GO:0006108);; Molecular Function: malate dehydrogenase (decarboxylating) (NAD+) activity (GO:0016619);; Molecular Function: metal ion binding (GO:0046872);; Molecular Function: NAD binding (GO:0051287);; Biological Process: oxidation-reduction process (GO:0055114);;	--	[C]	Energy production and conversion	Malic enzyme, NAD binding domain;; Malic enzyme, N-terminal domain	NADP-dependent malic enzyme OS=Vitis vinifera (Grape) PE=2 SV=1	PREDICTED: NADP-dependent malic enzyme [Beta vulgaris subsp. vulgaris]
c37881.graph_c0	--	--	--	--	--	--	GDP-fucose protein O-fucosyltransferase	--	PREDICTED: uncharacterized protein LOC104891763 [Beta vulgaris subsp. vulgaris]
c41483.graph_c0	[FGR]	--	Molecular Function: protein kinase C binding (GO:0005080);; Cellular Component: peroxisome (GO:0005777);; Cellular Component: cytosol (GO:0005829);; Cellular Component: plasma membrane (GO:0005886);; Biological Process: sulfur compound metabolic process (GO:0006790);; Molecular Function: zinc ion binding (GO:0008270);; Biological Process: purine ribonucleotide metabolic process (GO:0009150);; Mol…	--	[T]	Signal transduction mechanisms	HIT domain;; Scavenger mRNA decapping enzyme C-term binding	14 kDa zinc-binding protein GN=ZBP14 OS=Zea mays (Maize) PE=1 SV=1	PREDICTED: 14 kDa zinc-binding protein-like [Beta vulgaris subsp. vulgaris]
c18071.graph_c0	[G]	Carbohydrate transport and metabolism	Biological Process: defense response to oomycetes (GO:0002229);; Cellular Component: peroxisome (GO:0005777);; Cellular Component: plasma membrane (GO:0005886);; Biological Process: pentose-phosphate shunt (GO:0006098);; Cellular Component: chloroplast stroma (GO:0009570);; Molecular Function: 6-phosphogluconolactonase activity (GO:0017057);; Biological Process: defense response to bacterium (GO:…	--	[G]	Carbohydrate transport and metabolism	Glucosamine-6-phosphate isomerases/6-phosphogluconolactonase	Probable 6-phosphogluconolactonase 4, chloroplastic (Precursor) OS=Oryza sativa subsp. japonica (Rice) PE=2 SV=2	PREDICTED: probable 6-phosphogluconolactonase 4, chloroplastic-like [Citrus sinensis]
c52958.graph_c0	--	--	--	--	--	--	--	--	putative reverse transcriptase family member [Malus domestica]
c30737.graph_c1	--	--	Molecular Function: DNA binding (GO:0003677);; Cellular Component: chromosome (GO:0005694);;	K11275|8e-48|pop:POPTR_679169|HON906	--	--	linker histone H1 and H5 family	Histone H1 OS=Solanum pennellii (Tomato) PE=2 SV=1	PREDICTED: histone H1 [Beta vulgaris subsp. vulgaris]
c34265.graph_c0	[M]	Cell wall/membrane/envelope biogenesis	--	--	--	--	Mitochondrial fission ELM1;; Mitochondrial fission ELM1	Mitochondrial fission protein ELM1 GN=ELM1 OS=Arabidopsis thaliana (Mouse-ear cress) PE=1 SV=1	PREDICTED: mitochondrial fission protein ELM1 [Beta vulgaris subsp. vulgaris]
c75885.graph_c0	[FP]	--	--	--	--	--	--	--	hypothetical protein AURANDRAFT_71710, partial [Aureococcus anophagefferens]
c37624.graph_c0	--	--	--	--	--	--	Domain of unknown function (DUF4378)	--	PREDICTED: uncharacterized protein LOC104895726 isoform X1 [Beta vulgaris subsp. vulgaris]
c18357.graph_c0	--	--	Molecular Function: transporter activity (GO:0005215);; Cellular Component: mitochondrial inner membrane (GO:0005743);; Biological Process: mitochondrial transport (GO:0006839);; Cellular Component: integral component of membrane (GO:0016021);; Biological Process: transmembrane transport (GO:0055085);;	--	[C]	Energy production and conversion	Mitochondrial carrier protein	Probable mitochondrial adenine nucleotide transporter BTL1 GN=At3g20240 OS=Arabidopsis thaliana (Mouse-ear cress) PE=2 SV=1	PREDICTED: probable mitochondrial adenine nucleotide transporter BTL1 [Beta vulgaris subsp. vulgaris]
c47476.graph_c0	--	--	--	--	--	--	Protein of unknown function (DUF674)	--	hypothetical protein POPTR_0607s00230g [Populus trichocarpa]
c43363.graph_c0	--	--	--	--	--	--	--	--	PREDICTED: uncharacterized protein LOC104889342 [Beta vulgaris subsp. vulgaris]
c26719.graph_c0	--	--	--	--	[R]	General function prediction only	PPR repeat family;; PPR repeat;; PPR repeat;; Pentatricopeptide repeat domain;; Tetratricopeptide repeat;; Mitochondrial ATPase expression;; Myb-like DNA-binding domain	Pentatricopeptide repeat-containing protein At1g05600 GN=At1g05600 OS=Arabidopsis thaliana (Mouse-ear cress) PE=2 SV=1	PREDICTED: pentatricopeptide repeat-containing protein At1g05600 [Beta vulgaris subsp. vulgaris]
c42646.graph_c0	--	--	--	--	[T]	Signal transduction mechanisms	--	Proline-rich receptor-like protein kinase PERK10 GN=PERK10 OS=Arabidopsis thaliana (Mouse-ear cress) PE=2 SV=2	hypothetical protein VOLCADRAFT_101835 [Volvox carteri f. nagariensis]
c23509.graph_c0	[L]	Replication, recombination and repair	Molecular Function: DNA binding (GO:0003677);; Molecular Function: RNA binding (GO:0003723);; Molecular Function: RNA-directed DNA polymerase activity (GO:0003964);; Cellular Component: mitochondrion (GO:0005739);; Biological Process: RNA-dependent DNA replication (GO:0006278);; Biological Process: DNA recombination (GO:0006310);; Molecular Function: zinc ion binding (GO:0008270);; Biological Pro…	--	[R]	General function prediction only	--	--	PREDICTED: uncharacterized protein LOC104883483 [Beta vulgaris subsp. vulgaris]
c30038.graph_c0	--	--	--	--	--	--	--	Uncharacterized protein At5g39570 GN=At5g39570 OS=Arabidopsis thaliana (Mouse-ear cress) PE=1 SV=1	PREDICTED: uncharacterized protein At5g39570 isoform X1 [Beta vulgaris subsp. vulgaris]
c41173.graph_c0	--	--	--	--	--	--	--	CASP-like protein 4A1 GN=Sb04g002820 OS=Sorghum bicolor (Sorghum) PE=3 SV=1	PREDICTED: uncharacterized protein LOC104899524 [Beta vulgaris subsp. vulgaris]
c35402.graph_c0	[C]	Energy production and conversion	Molecular Function: glycerol-3-phosphate dehydrogenase [NAD+] activity (GO:0004367);; Biological Process: carbohydrate metabolic process (GO:0005975);; Cellular Component: glycerol-3-phosphate dehydrogenase complex (GO:0009331);; Biological Process: systemic acquired resistance (GO:0009627);; Biological Process: glycerol-3-phosphate catabolic process (GO:0046168);; Molecular Function: glycerol-3-…	--	[C]	Energy production and conversion	NAD-dependent glycerol-3-phosphate dehydrogenase C-terminus;; NAD-dependent glycerol-3-phosphate dehydrogenase N-terminus	Glycerol-3-phosphate dehydrogenase [NAD(+)] GPDHC1, cytosolic GN=GPDHC1 OS=Arabidopsis thaliana (Mouse-ear cress) PE=2 SV=1	PREDICTED: probable glycerol-3-phosphate dehydrogenase [NAD(+)] 1, cytosolic [Beta vulgaris subsp. vulgaris]
c64856.graph_c0	--	--	--	--	[Z]	Cytoskeleton	Tropomodulin	--	--
c42976.graph_c0	[R]	General function prediction only	--	--	[R]	General function prediction only	Ankyrin repeats (3 copies);; Ankyrin repeats (many copies);; Ankyrin repeats (many copies);; Domain of unknown function;; Ankyrin repeat;; Ankyrin repeat	Ankyrin repeat-containing protein At3g12360 GN=At3g12360 OS=Arabidopsis thaliana (Mouse-ear cress) PE=2 SV=1	PREDICTED: ankyrin repeat-containing protein At5g02620-like [Beta vulgaris subsp. vulgaris]
c37394.graph_c0	--	--	Molecular Function: hydrolase activity, hydrolyzing O-glycosyl compounds (GO:0004553);; Biological Process: carbohydrate metabolic process (GO:0005975);;	--	--	--	Glycosyl hydrolases family 17;; X8 domain;; Glycosyl hydrolases family 17	Glucan endo-1,3-beta-glucosidase 8 (Precursor) GN=At1g64760 OS=Arabidopsis thaliana (Mouse-ear cress) PE=1 SV=2	PREDICTED: glucan endo-1,3-beta-glucosidase 8 [Beta vulgaris subsp. vulgaris]
c45176.graph_c0	[O]	Posttranslational modification, protein turnover, chaperones	Molecular Function: ATP binding (GO:0005524);; Cellular Component: cell wall (GO:0005618);; Cellular Component: mitochondrial matrix (GO:0005759);; Cellular Component: vacuolar membrane (GO:0005774);; Biological Process: gluconeogenesis (GO:0006094);; Biological Process: glycolysis (GO:0006096);; Biological Process: protein folding (GO:0006457);; Molecular Function: zinc ion binding (GO:0008270);…	--	[O]	Posttranslational modification, protein turnover, chaperones	Hsp70 protein	Heat shock 70 kDa protein, mitochondrial (Precursor) OS=Phaseolus vulgaris (Kidney bean) PE=1 SV=1	PREDICTED: heat shock 70 kDa protein, mitochondrial-like [Beta vulgaris subsp. vulgaris]
c42403.graph_c0	--	--	Molecular Function: transferase activity (GO:0016740);;	K13648|0.0|vvi:100251205|hypothetical protein LOC100251205	--	--	Glycosyl transferase family 8	Probable galacturonosyltransferase 6 GN=GAUT6 OS=Arabidopsis thaliana (Mouse-ear cress) PE=2 SV=1	PREDICTED: probable galacturonosyltransferase 6 [Beta vulgaris subsp. vulgaris]
c45663.graph_c0	[R]	General function prediction only	Molecular Function: acid phosphatase activity (GO:0003993);; Molecular Function: protein serine/threonine phosphatase activity (GO:0004722);; Cellular Component: membrane (GO:0016020);; Biological Process: ovule development (GO:0048481);;	--	[R]	General function prediction only	Calcineurin-like phosphoesterase;; Calcineurin-like phosphoesterase superfamily domain	Probable inactive purple acid phosphatase 16 (Precursor) GN=PAP16 OS=Arabidopsis thaliana (Mouse-ear cress) PE=2 SV=1	PREDICTED: probable inactive purple acid phosphatase 16 isoform X1 [Beta vulgaris subsp. vulgaris]
c11575.graph_c0	--	--	Cellular Component: nucleus (GO:0005634);; Biological Process: response to blue light (GO:0009637);; Biological Process: embryo development ending in seed dormancy (GO:0009793);; Biological Process: seed germination (GO:0009845);; Biological Process: ethylene-activated signaling pathway (GO:0009873);; Biological Process: regulation of flower development (GO:0009909);; Biological Process: meristem…	K13119|0.0|pop:POPTR_831296|hypothetical protein	[S]	Function unknown	XAP5, circadian clock regulator	Protein XAP5 CIRCADIAN TIMEKEEPER GN=XCT OS=Arabidopsis thaliana (Mouse-ear cress) PE=1 SV=1	PREDICTED: protein XAP5 CIRCADIAN TIMEKEEPER [Beta vulgaris subsp. vulgaris]
c59518.graph_c0	--	--	--	--	--	--	--	--	PREDICTED: uncharacterized protein LOC104891961 [Beta vulgaris subsp. vulgaris]
c30773.graph_c0	--	--	Cellular Component: cytoplasm (GO:0005737);;	--	[L]	Replication, recombination and repair	Domain of unknown function (DUF1771);; Smr domain	--	PREDICTED: uncharacterized protein LOC104890512 [Beta vulgaris subsp. vulgaris]
c47705.graph_c0	[J]	Translation, ribosomal structure and biogenesis	Molecular Function: RNA binding (GO:0003723);; Molecular Function: structural constituent of ribosome (GO:0003735);; Biological Process: translation (GO:0006412);; Cellular Component: small ribosomal subunit (GO:0015935);;	K02981|0.0|zma:100382980|hypothetical protein LOC100382980	[J]	Translation, ribosomal structure and biogenesis	Ribosomal protein S5, N-terminal domain;; Ribosomal protein S5, C-terminal domain	40S ribosomal protein S2-1 OS=Arabidopsis thaliana (Mouse-ear cress) PE=2 SV=2	hypothetical protein SELMODRAFT_149893 [Selaginella moellendorffii]
c40113.graph_c0	--	--	--	--	[UD]	--	RINT-1 / TIP-1 family	RINT1-like protein MAG2L {ECO:0000305} OS=Arabidopsis thaliana (Mouse-ear cress) PE=2 SV=1	PREDICTED: RINT1-like protein MAG2L [Beta vulgaris subsp. vulgaris]
c26767.graph_c0	[R]	General function prediction only	--	--	[R]	General function prediction only	Ankyrin repeats (3 copies);; Ankyrin repeat;; Ankyrin repeats (many copies);; Ankyrin repeat;; Ankyrin repeats (many copies)	Protein S-acyltransferase 24 GN=F5O24.240 OS=Arabidopsis thaliana (Mouse-ear cress) PE=2 SV=1	flagella associated protein [Chlamydomonas reinhardtii]
c50663.graph_c0	--	--	--	--	[R]	General function prediction only	--	--	polypepetide with reverse transcriptase and RNaseH domains [Petunia x hybrida]
c46504.graph_c0	--	--	--	--	--	--	No apical meristem (NAM) protein	NAC transcription factor 25 GN=At1g61110 OS=Arabidopsis thaliana (Mouse-ear cress) PE=2 SV=1	PREDICTED: NAC transcription factor ONAC010-like [Glycine max]
c25837.graph_c0	--	--	--	--	--	--	Phosphorylase superfamily	Bark storage protein A (Precursor) GN=BSPA OS=Populus deltoides (Eastern poplar) PE=2 SV=1	PREDICTED: bark storage protein A-like [Beta vulgaris subsp. vulgaris]
c12195.graph_c0	--	--	Biological Process: transport (GO:0006810);; Cellular Component: membrane (GO:0016020);;	--	[R]	General function prediction only	Sugar efflux transporter for intercellular exchange;; Uncharacterised protein family (UPF0041)	Bidirectional sugar transporter SWEET7 OS=Arabidopsis thaliana (Mouse-ear cress) PE=2 SV=1	PREDICTED: bidirectional sugar transporter SWEET7-like [Beta vulgaris subsp. vulgaris]
c80219.graph_c0	[G]	Carbohydrate transport and metabolism	--	--	--	--	--	--	hypothetical protein SMAC_10417 [Sordaria macrospora k-hell]
c35117.graph_c0	[R]	General function prediction only	Molecular Function: binding (GO:0005488);;	--	[R]	General function prediction only	RNA recognition motif. (a.k.a. RRM, RBD, or RNP domain);; RNA recognition motif (a.k.a. RRM, RBD, or RNP domain);; RNA recognition motif. (a.k.a. RRM, RBD, or RNP domain);; Zinc knuckle	Glycine-rich RNA-binding protein RZ1C {ECO:0000305} OS=Arabidopsis thaliana (Mouse-ear cress) PE=1 SV=1	PREDICTED: glycine-rich RNA-binding protein RZ1C [Beta vulgaris subsp. vulgaris]
c30427.graph_c0	--	--	Molecular Function: DNA binding (GO:0003677);; Cellular Component: chloroplast (GO:0009507);; Biological Process: chloroplast-nucleus signaling pathway (GO:0010019);; Biological Process: mitochondria-nucleus signaling pathway (GO:0031930);;	--	[R]	General function prediction only	PPR repeat family;; PPR repeat;; PPR repeat;; Pentatricopeptide repeat domain;; Evolutionarily conserved signalling intermediate in Toll pathway	Pentatricopeptide repeat-containing protein At2g31400, chloroplastic (Precursor) GN=At2g31400 OS=Arabidopsis thaliana (Mouse-ear cress) PE=2 SV=1	PREDICTED: pentatricopeptide repeat-containing protein At2g31400, chloroplastic isoform X1 [Beta vulgaris subsp. vulgaris]
c42587.graph_c0	[LKJ]	--	Molecular Function: nucleic acid binding (GO:0003676);; Molecular Function: ATP binding (GO:0005524);; Molecular Function: ATP-dependent helicase activity (GO:0008026);; Biological Process: pyrimidine ribonucleotide biosynthetic process (GO:0009220);;	--	[A]	RNA processing and modification	DEAD/DEAH box helicase;; Helicase conserved C-terminal domain;; Type III restriction enzyme, res subunit	DEAD-box ATP-dependent RNA helicase 57 OS=Oryza sativa subsp. japonica (Rice) PE=2 SV=2	PREDICTED: DEAD-box ATP-dependent RNA helicase 57 [Beta vulgaris subsp. vulgaris]
c25654.graph_c0	[I]	Lipid transport and metabolism	Cellular Component: endomembrane system (GO:0012505);; Cellular Component: organelle membrane (GO:0031090);; Cellular Component: intracellular membrane-bounded organelle (GO:0043231);; Cellular Component: cytoplasmic part (GO:0044444);; Cellular Component: intracellular organelle part (GO:0044446);;	--	[R]	General function prediction only	alpha/beta hydrolase fold;; Carboxylesterase family	Probable isoprenylcysteine alpha-carbonyl methylesterase ICMEL1 OS=Arabidopsis thaliana (Mouse-ear cress) PE=2 SV=1	PREDICTED: probable isoprenylcysteine alpha-carbonyl methylesterase ICMEL1 isoform X1 [Beta vulgaris subsp. vulgaris]
c18176.graph_c1	--	--	--	--	[T]	Signal transduction mechanisms	--	Probable serine/threonine-protein kinase RLCKVII GN=At1g07870 OS=Arabidopsis thaliana (Mouse-ear cress) PE=2 SV=1	PREDICTED: serine/threonine-protein kinase CDL1-like isoform X1 [Beta vulgaris subsp. vulgaris]
c44874.graph_c0	--	--	--	--	--	--	--	--	PREDICTED: uncharacterized acetyltransferase At3g50280-like [Beta vulgaris subsp. vulgaris]
c37557.graph_c0	[MG]	--	Molecular Function: catalytic activity (GO:0003824);; Biological Process: cellular metabolic process (GO:0044237);; Molecular Function: coenzyme binding (GO:0050662);;	--	[V]	Defense mechanisms	NAD dependent epimerase/dehydratase family;; 3-beta hydroxysteroid dehydrogenase/isomerase family;; NADH(P)-binding;; Male sterility protein;; NmrA-like family;; short chain dehydrogenase	Tetraketide alpha-pyrone reductase 1 GN=F23E12.20 OS=Arabidopsis thaliana (Mouse-ear cress) PE=2 SV=1	PREDICTED: cinnamoyl-CoA reductase 1-like isoform X1 [Beta vulgaris subsp. vulgaris]
c56402.graph_c0	--	--	Molecular Function: transferase activity, transferring phosphorus-containing groups (GO:0016772);;	--	[T]	Signal transduction mechanisms	Protein kinase domain	Probable receptor protein kinase TMK1 (Precursor) GN=TMK1 OS=Arabidopsis thaliana (Mouse-ear cress) PE=1 SV=1	PREDICTED: probable inactive receptor-like protein kinase At1g65250 isoform X3 [Beta vulgaris subsp. vulgaris]
c62213.graph_c0	--	--	--	--	[R]	General function prediction only	--	--	PREDICTED: uncharacterized protein LOC104242320 [Nicotiana sylvestris]
c43030.graph_c0	[S]	Function unknown	--	--	[C]	Energy production and conversion	SURF1 family	Surfeit locus protein 1 GN=MEB5.13 OS=Arabidopsis thaliana (Mouse-ear cress) PE=2 SV=1	PREDICTED: surfeit locus protein 1 isoform X2 [Beta vulgaris subsp. vulgaris]
c22847.graph_c0	--	--	--	--	--	--	Protein of unknown function (DUF1298)	--	PREDICTED: O-acyltransferase WSD1-like [Beta vulgaris subsp. vulgaris]
c44090.graph_c0	--	--	--	--	--	--	Protein of unknown function (DUF793)	Protein BPS1, chloroplastic (Precursor) GN=BPS1 OS=Arabidopsis thaliana (Mouse-ear cress) PE=2 SV=1	PREDICTED: uncharacterized protein LOC104889478 [Beta vulgaris subsp. vulgaris]
c44042.graph_c0	[E]	Amino acid transport and metabolism	--	--	[OE]	--	Serine carboxypeptidase	Serine carboxypeptidase-like 7 (Precursor) GN=SCPL7 OS=Arabidopsis thaliana (Mouse-ear cress) PE=2 SV=1	PREDICTED: serine carboxypeptidase-like 13 [Beta vulgaris subsp. vulgaris]
c36085.graph_c0	[O]	Posttranslational modification, protein turnover, chaperones	--	--	[O]	Posttranslational modification, protein turnover, chaperones	PHD-like zinc-binding domain;; PHD-zinc-finger like domain;; ATPase family associated with various cellular activities (AAA);; AAA domain (Cdc48 subfamily)	ATPase family AAA domain-containing protein At1g05910 GN=At1g05910 OS=Arabidopsis thaliana (Mouse-ear cress) PE=2 SV=1	hypothetical protein CISIN_1g001066mg [Citrus sinensis]
c53896.graph_c0	--	--	--	--	[R]	General function prediction only	Reverse transcriptase (RNA-dependent DNA polymerase)	Uncharacterized mitochondrial protein AtMg01250 GN=AtMg01250 OS=Arabidopsis thaliana (Mouse-ear cress) PE=4 SV=1	PREDICTED: uncharacterized protein LOC103850017 [Brassica rapa]
c40585.graph_c0	--	--	Cellular Component: cytoplasmic membrane-bounded vesicle (GO:0016023);;	--	--	--	Domain of unknown function (DUF4218);; Domain of unknown function (DUF4216)	--	PREDICTED: uncharacterized protein LOC104882970 [Beta vulgaris subsp. vulgaris]
c66619.graph_c0	--	--	--	--	[E]	Amino acid transport and metabolism	--	Protein NRT1/ PTR FAMILY 5.7 GN=NPF5.7 OS=Arabidopsis thaliana (Mouse-ear cress) PE=2 SV=2	PREDICTED: protein NRT1/ PTR FAMILY 5.6-like [Beta vulgaris subsp. vulgaris]
c22010.graph_c0	--	--	--	K07195|0.0|vvi:100254158|hypothetical protein LOC100254158	[U]	Intracellular trafficking, secretion, and vesicular transport	Exo70 exocyst complex subunit	Exocyst complex component EXO70A1 GN=EXO70A1 OS=Arabidopsis thaliana (Mouse-ear cress) PE=1 SV=1	PREDICTED: exocyst complex component EXO70A1-like [Beta vulgaris subsp. vulgaris]
c28712.graph_c1	[RTKL]	--	Molecular Function: kinase activity (GO:0016301);;	--	--	--	Protein tyrosine kinase;; Protein kinase domain;; U-box domain;; Ring finger domain;; RING-H2 zinc finger;; Zinc finger, C3HC4 type (RING finger)	U-box domain-containing protein 32 GN=PUB32 OS=Arabidopsis thaliana (Mouse-ear cress) PE=2 SV=1	PREDICTED: U-box domain-containing protein 33 [Beta vulgaris subsp. vulgaris]
c41703.graph_c0	--	--	Molecular Function: aspartic-type endopeptidase activity (GO:0004190);; Cellular Component: endosome (GO:0005768);; Cellular Component: Golgi apparatus (GO:0005794);; Cellular Component: trans-Golgi network (GO:0005802);; Cellular Component: integral component of membrane (GO:0016021);;	K09598|0.0|vvi:100245846|hypothetical protein LOC100245846	[S]	Function unknown	Signal peptide peptidase	Signal peptide peptidase-like 1 GN=SPPL1 OS=Arabidopsis thaliana (Mouse-ear cress) PE=2 SV=1	PREDICTED: signal peptide peptidase-like 1 [Beta vulgaris subsp. vulgaris]
c32699.graph_c0	--	--	--	K13172|6e-91|rcu:RCOM_0798440|hypothetical protein	[A]	RNA processing and modification	cwf21 domain	DEAD-box ATP-dependent RNA helicase 42 GN=F9H16.10 OS=Arabidopsis thaliana (Mouse-ear cress) PE=1 SV=2	PREDICTED: protein starmaker [Beta vulgaris subsp. vulgaris]
c11239.graph_c2	--	--	Cellular Component: photosystem II (GO:0009523);; Cellular Component: chloroplast thylakoid membrane (GO:0009535);; Biological Process: photosynthesis, light harvesting (GO:0009765);; Cellular Component: integral component of membrane (GO:0016021);; Molecular Function: chlorophyll binding (GO:0016168);; Biological Process: protein-chromophore linkage (GO:0018298);;	K08917|2e-27|vvi:100241887|hypothetical protein LOC100241887	--	--	--	Chlorophyll a-b binding protein CP24, chloroplastic (Precursor) OS=Spinacia oleracea (Spinach) PE=2 SV=1	PREDICTED: chlorophyll a-b binding protein CP24, chloroplastic [Beta vulgaris subsp. vulgaris]
c11722.graph_c0	[S]	Function unknown	Biological Process: transmembrane transport (GO:0055085);;	--	--	--	OPT oligopeptide transporter protein	Metal-nicotianamine transporter YSL1 GN=YSL1 OS=Arabidopsis thaliana (Mouse-ear cress) PE=2 SV=2	PREDICTED: metal-nicotianamine transporter YSL1-like [Beta vulgaris subsp. vulgaris]
c40534.graph_c0	--	--	--	--	[R]	General function prediction only	Integrase core domain;; gag-polypeptide of LTR copia-type;; Retrotransposon gag protein	Endonuclease OS=Nicotiana tabacum (Common tobacco) PE=2 SV=1	PREDICTED: uncharacterized protein LOC104888623 [Beta vulgaris subsp. vulgaris]
c33153.graph_c0	--	--	--	--	--	--	Protein of unknown function (DUF1639)	--	PREDICTED: uncharacterized protein DDB_G0283357-like [Beta vulgaris subsp. vulgaris]
c33266.graph_c1	--	--	--	--	--	--	--	--	PREDICTED: uncharacterized protein LOC104890896 [Beta vulgaris subsp. vulgaris]
c40791.graph_c0	[L]	Replication, recombination and repair	Molecular Function: binding (GO:0005488);;	--	[R]	General function prediction only	gag-polyprotein putative aspartyl protease;; Reverse transcriptase (RNA-dependent DNA polymerase);; Aspartyl protease	RNA-directed DNA polymerase homolog OS=Oenothera berteroana (Bertero&apos;s evening primrose) PE=4 SV=1	PREDICTED: uncharacterized protein LOC104894399 [Beta vulgaris subsp. vulgaris]
c30032.graph_c0	--	--	--	--	[GC]	--	UDP-glucoronosyl and UDP-glucosyl transferase	UDP-glycosyltransferase 90A1 GN=UGT90A1 OS=Arabidopsis thaliana (Mouse-ear cress) PE=2 SV=1	PREDICTED: UDP-glycosyltransferase 90A1-like [Beta vulgaris subsp. vulgaris]
c39267.graph_c0	[O]	Posttranslational modification, protein turnover, chaperones	Molecular Function: ATP binding (GO:0005524);;	K03283|3e-37|sbi:SORBI_09g022580|hypothetical protein	[O]	Posttranslational modification, protein turnover, chaperones	Hsp70 protein	Heat shock cognate 70 kDa protein 1 GN=HSC-I OS=Solanum lycopersicum (Tomato) PE=2 SV=1	PREDICTED: heat shock cognate 70 kDa protein 2-like [Beta vulgaris subsp. vulgaris]
c79480.graph_c0	--	--	--	--	--	--	--	--	PREDICTED: uncharacterized protein LOC104882888 [Beta vulgaris subsp. vulgaris]
c30576.graph_c0	[V]	Defense mechanisms	Molecular Function: nucleotide binding (GO:0000166);; Biological Process: transport (GO:0006810);; Biological Process: cellular process (GO:0009987);; Molecular Function: ATPase activity (GO:0016887);;	--	[Q]	Secondary metabolites biosynthesis, transport and catabolism	ABC transporter transmembrane region;; ABC transporter;; ABC transporter;; ABC transporter transmembrane region;; ABC transporter transmembrane region	ABC transporter C family member 10 GN=F17J16.190 OS=Arabidopsis thaliana (Mouse-ear cress) PE=2 SV=2	PREDICTED: ABC transporter C family member 10-like isoform X5 [Beta vulgaris subsp. vulgaris]
c35422.graph_c1	--	--	--	--	[O]	Posttranslational modification, protein turnover, chaperones	zinc-finger	--	PREDICTED: E3 ubiquitin-protein ligase RING1 isoform X2 [Beta vulgaris subsp. vulgaris]
c42384.graph_c0	[I]	Lipid transport and metabolism	Molecular Function: glycylpeptide N-tetradecanoyltransferase activity (GO:0004379);; Biological Process: N-terminal protein myristoylation (GO:0006499);;	--	[I]	Lipid transport and metabolism	Myristoyl-CoA:protein N-myristoyltransferase, N-terminal domain	Glycylpeptide N-tetradecanoyltransferase 1 GN=NMT1 OS=Arabidopsis thaliana (Mouse-ear cress) PE=1 SV=2	hypothetical protein [Beta vulgaris]
c36665.graph_c0	--	--	--	--	--	--	--	--	PREDICTED: uncharacterized protein LOC104902539 isoform X2 [Beta vulgaris subsp. vulgaris]
c43699.graph_c0	[R]	General function prediction only	Biological Process: formation of translation preinitiation complex (GO:0001731);; Molecular Function: translation initiation factor activity (GO:0003743);; Cellular Component: eukaryotic translation initiation factor 3 complex (GO:0005852);; Biological Process: regulation of translational initiation (GO:0006446);; Cellular Component: eukaryotic 43S preinitiation complex (GO:0016282);; Cellular Co…	K03246|1e-121|rcu:RCOM_0776150|eukaryotic translation initiation factor 3 subunit, putative	[JT]	--	WD domain, G-beta repeat	Eukaryotic translation initiation factor 3 subunit I {ECO:0000255|HAMAP-Rule:MF_03008} GN=TIF3I1 OS=Arabidopsis thaliana (Mouse-ear cress) PE=2 SV=2	PREDICTED: eukaryotic translation initiation factor 3 subunit I-like [Beta vulgaris subsp. vulgaris]
c10900.graph_c0	--	--	--	--	--	--	--	--	PREDICTED: uncharacterized protein LOC104895613 [Beta vulgaris subsp. vulgaris]
c38540.graph_c0	[L]	Replication, recombination and repair	Molecular Function: RNA binding (GO:0003723);; Molecular Function: RNA-directed DNA polymerase activity (GO:0003964);; Molecular Function: aspartic-type endopeptidase activity (GO:0004190);; Biological Process: RNA-dependent DNA replication (GO:0006278);; Biological Process: proteolysis (GO:0006508);; Molecular Function: zinc ion binding (GO:0008270);; Biological Process: DNA integration (GO:0015…	--	[R]	General function prediction only	Reverse transcriptase (RNA-dependent DNA polymerase)	RNA-directed DNA polymerase homolog OS=Oenothera berteroana (Bertero&apos;s evening primrose) PE=4 SV=1	PREDICTED: uncharacterized protein LOC104896594 [Beta vulgaris subsp. vulgaris]
c1597.graph_c0	--	--	--	--	[R]	General function prediction only	--	--	hypothetical protein [Beta vulgaris]
c37900.graph_c0	--	--	Molecular Function: nucleotide binding (GO:0000166);; Biological Process: cellular process (GO:0009987);;	--	[DT]	--	G-protein alpha subunit	Extra-large guanine nucleotide-binding protein 1 GN=F26B6.11 OS=Arabidopsis thaliana (Mouse-ear cress) PE=1 SV=2	PREDICTED: extra-large guanine nucleotide-binding protein 1-like [Beta vulgaris subsp. vulgaris]
c46341.graph_c0	[IQ]	--	Molecular Function: 4-coumarate-CoA ligase activity (GO:0016207);; Molecular Function: Photinus-luciferin 4-monooxygenase (ATP-hydrolyzing) activity (GO:0047077);; Biological Process: oxidation-reduction process (GO:0055114);;	K01904|8e-66|rcu:RCOM_0473330|AMP dependent CoA ligase, putative (EC:1.13.12.7)	[I]	Lipid transport and metabolism	AMP-binding enzyme	4-coumarate--CoA ligase-like 7 GN=4CLL7 OS=Arabidopsis thaliana (Mouse-ear cress) PE=1 SV=1	PREDICTED: 4-coumarate--CoA ligase-like 7 [Beta vulgaris subsp. vulgaris]
c29861.graph_c0	[C]	Energy production and conversion	Molecular Function: malate dehydrogenase (decarboxylating) (NADP+) activity (GO:0004473);; Biological Process: gluconeogenesis (GO:0006094);; Biological Process: malate metabolic process (GO:0006108);; Biological Process: fatty acid biosynthetic process (GO:0006633);; Biological Process: cytoskeleton organization (GO:0007010);; Molecular Function: zinc ion binding (GO:0008270);; Cellular Componen…	--	[C]	Energy production and conversion	Malic enzyme, NAD binding domain;; Malic enzyme, N-terminal domain	NADP-dependent malic enzyme, chloroplastic (Precursor) GN=MODA OS=Flaveria pringlei PE=2 SV=1	PREDICTED: NADP-dependent malic enzyme [Beta vulgaris subsp. vulgaris]
c28238.graph_c0	--	--	--	--	--	--	--	--	PREDICTED: dentin sialophosphoprotein [Beta vulgaris subsp. vulgaris]
c20791.graph_c0	--	--	Cellular Component: mitochondrial respiratory chain complex I (GO:0005747);; Biological Process: ubiquitin-dependent protein catabolic process (GO:0006511);; Biological Process: photorespiration (GO:0009853);; Biological Process: response to misfolded protein (GO:0051788);; Biological Process: proteasome core complex assembly (GO:0080129);;	K03945|4e-31|vvi:100241945|hypothetical protein LOC100241945	--	--	--	NADH dehydrogenase [ubiquinone] 1 alpha subcomplex subunit 1 GN=At3g08610 OS=Arabidopsis thaliana (Mouse-ear cress) PE=3 SV=1	PREDICTED: NADH dehydrogenase [ubiquinone] 1 alpha subcomplex subunit 1 [Beta vulgaris subsp. vulgaris]
c52734.graph_c0	[V]	Defense mechanisms	Molecular Function: nucleotide binding (GO:0000166);; Cellular Component: membrane (GO:0016020);; Molecular Function: nucleoside-triphosphatase activity (GO:0017111);;	--	[Q]	Secondary metabolites biosynthesis, transport and catabolism	--	ABC transporter G family member 22 GN=F15M7.6 OS=Arabidopsis thaliana (Mouse-ear cress) PE=1 SV=1	PREDICTED: ABC transporter G family member 22-like [Beta vulgaris subsp. vulgaris]
c41224.graph_c0	--	--	Biological Process: MAPK cascade (GO:0000165);; Molecular Function: sequence-specific DNA binding transcription factor activity (GO:0003700);; Biological Process: protein targeting to membrane (GO:0006612);; Biological Process: response to bacterium (GO:0009617);; Biological Process: systemic acquired resistance, salicylic acid mediated signaling pathway (GO:0009862);; Biological Process: jasmoni…	--	--	--	TCP family transcription factor	Transcription factor TCP21 GN=F8L15.60 OS=Arabidopsis thaliana (Mouse-ear cress) PE=1 SV=1	PREDICTED: glycine-rich cell wall structural protein-like [Beta vulgaris subsp. vulgaris]
c30300.graph_c0	--	--	Molecular Function: nucleotide binding (GO:0000166);; Molecular Function: nucleic acid binding (GO:0003676);;	--	[D]	Cell cycle control, cell division, chromosome partitioning	RNA recognition motif 2	Protein MEI2-like 2 GN=OJ1008_D06.12-1 OS=Oryza sativa subsp. japonica (Rice) PE=2 SV=1	PREDICTED: protein MEI2-like 5 [Beta vulgaris subsp. vulgaris]
c11231.graph_c0	[O]	Posttranslational modification, protein turnover, chaperones	Molecular Function: metalloendopeptidase activity (GO:0004222);; Molecular Function: ATP binding (GO:0005524);; Biological Process: proteolysis (GO:0006508);; Cellular Component: membrane (GO:0016020);; Molecular Function: nucleoside-triphosphatase activity (GO:0017111);; Biological Process: protein catabolic process (GO:0030163);;	K03798|0.0|vvi:100250511|hypothetical protein LOC100250511	[O]	Posttranslational modification, protein turnover, chaperones	Peptidase family M41;; ATPase family associated with various cellular activities (AAA);; FtsH Extracellular;; TIP49 C-terminus;; AAA domain (dynein-related subfamily);; Holliday junction DNA helicase ruvB N-terminus	ATP-dependent zinc metalloprotease FTSH 2, chloroplastic (Precursor) GN=F7F1.16 OS=Arabidopsis thaliana (Mouse-ear cress) PE=1 SV=1	PREDICTED: ATP-dependent zinc metalloprotease FTSH 2, chloroplastic [Beta vulgaris subsp. vulgaris]
c20838.graph_c0	--	--	Cellular Component: intracellular organelle (GO:0043229);; Cellular Component: cytoplasmic part (GO:0044444);;	--	--	--	Ribosomal protein L35	--	PREDICTED: uncharacterized protein LOC104893055 [Beta vulgaris subsp. vulgaris]
c77470.graph_c0	[R]	General function prediction only	--	--	[TZ]	--	--	Extensin (Precursor) GN=HRGP OS=Zea mays (Maize) PE=2 SV=1	OSJNBa0086B14.8 [Oryza sativa Japonica Group]
c45930.graph_c0	--	--	--	--	[M]	Cell wall/membrane/envelope biogenesis	--	Mechanosensitive ion channel protein 7 GN=MSL7 OS=Arabidopsis thaliana (Mouse-ear cress) PE=3 SV=1	mechanosensitive ion channel domain-containing protein [Arabidopsis lyrata subsp. lyrata]
c57048.graph_c0	--	--	Biological Process: DNA recombination (GO:0006310);; Biological Process: chromosome segregation (GO:0007059);; Biological Process: meiosis I (GO:0007127);; Biological Process: chromosome organization (GO:0051276);;	--	[R]	General function prediction only	PPR repeat family;; PPR repeat;; Pentatricopeptide repeat domain;; PPR repeat	Pentatricopeptide repeat-containing protein At3g16610 GN=PCMP-E91 OS=Arabidopsis thaliana (Mouse-ear cress) PE=2 SV=1	PREDICTED: pentatricopeptide repeat-containing protein At3g16610 [Beta vulgaris subsp. vulgaris]
c16163.graph_c0	--	--	Cellular Component: membrane (GO:0016020);; Molecular Function: transmembrane transporter activity (GO:0022857);; Biological Process: transmembrane transport (GO:0055085);;	--	[F]	Nucleotide transport and metabolism	Permease family	Nucleobase-ascorbate transporter 2 GN=NAT2 OS=Arabidopsis thaliana (Mouse-ear cress) PE=2 SV=2	PREDICTED: nucleobase-ascorbate transporter 2 [Beta vulgaris subsp. vulgaris]
c58741.graph_c0	--	--	Molecular Function: nucleic acid binding (GO:0003676);; Molecular Function: zinc ion binding (GO:0008270);; Biological Process: DNA integration (GO:0015074);; Biological Process: ammonium transport (GO:0015696);; Cellular Component: membrane (GO:0016020);;	--	[R]	General function prediction only	Integrase core domain	Endonuclease OS=Nicotiana tabacum (Common tobacco) PE=2 SV=1	Putative gag-pol polyprotein, identical [Solanum demissum]
c53523.graph_c0	--	--	--	--	[U]	Intracellular trafficking, secretion, and vesicular transport	Variant SH3 domain;; Variant SH3 domain;; SH3 domain	--	Putative BAR-domain-containing protein [Rhizopus microsporus]
c54050.graph_c0	[R]	General function prediction only	--	--	[R]	General function prediction only	Alpha/beta hydrolase family;; alpha/beta hydrolase fold	--	PREDICTED: uncharacterized protein LOC104899751 [Beta vulgaris subsp. vulgaris]
c34589.graph_c0	--	--	Molecular Function: ATP binding (GO:0005524);; Cellular Component: plasma membrane (GO:0005886);; Biological Process: ATP catabolic process (GO:0006200);; Biological Process: fatty acid beta-oxidation (GO:0006635);; Biological Process: peroxisome organization (GO:0007031);; Biological Process: toxin catabolic process (GO:0009407);; Biological Process: positive regulation of seed germination (GO:0…	--	[IR]	--	--	ABC transporter D family member 1 GN=At4g39850 OS=Arabidopsis thaliana (Mouse-ear cress) PE=1 SV=1	PREDICTED: ABC transporter D family member 1 [Beta vulgaris subsp. vulgaris]
c36643.graph_c0	[O]	Posttranslational modification, protein turnover, chaperones	Molecular Function: metalloendopeptidase activity (GO:0004222);; Biological Process: threonylcarbamoyladenosine biosynthetic process (GO:0070526);;	K01409|1e-111|pop:POPTR_1097965|hypothetical protein	[O]	Posttranslational modification, protein turnover, chaperones	Glycoprotease family;; Glycoprotease family	Probable tRNA N6-adenosine threonylcarbamoyltransferase, mitochondrial {ECO:0000255|HAMAP-Rule:MF_03179} (Precursor) GN=At2g45270 OS=Arabidopsis thaliana (Mouse-ear cress) PE=2 SV=2	PREDICTED: probable tRNA N6-adenosine threonylcarbamoyltransferase, mitochondrial isoform X1 [Beta vulgaris subsp. vulgaris]
c9581.graph_c0	--	--	--	--	--	--	AUX/IAA family	Auxin-responsive protein IAA33 GN=IAA33 OS=Arabidopsis thaliana (Mouse-ear cress) PE=2 SV=1	PREDICTED: auxin-responsive protein IAA33 [Beta vulgaris subsp. vulgaris]
c17444.graph_c0	--	--	--	--	--	--	--	Putative U-box domain-containing protein 55 GN=PUB55 OS=Arabidopsis thaliana (Mouse-ear cress) PE=3 SV=1	PREDICTED: U-box domain-containing protein 33-like isoform X3 [Beta vulgaris subsp. vulgaris]
c27838.graph_c3	[HI]	--	Molecular Function: 1-deoxy-D-xylulose-5-phosphate synthase activity (GO:0008661);; Biological Process: thiamine biosynthetic process (GO:0009228);; Cellular Component: chloroplast (GO:0009507);; Biological Process: terpenoid biosynthetic process (GO:0016114);; Molecular Function: metal ion binding (GO:0046872);; Biological Process: 1-deoxy-D-xylulose 5-phosphate biosynthetic process (GO:0052865)…	K01662|0.0|rcu:RCOM_0679170|1-deoxyxylulose-5-phosphate synthase, putative (EC:2.2.1.7)	[G]	Carbohydrate transport and metabolism	1-deoxy-D-xylulose-5-phosphate synthase;; Transketolase, pyrimidine binding domain;; Transketolase, C-terminal domain;; Thiamine pyrophosphate enzyme, C-terminal TPP binding domain;; Transketolase, thiamine diphosphate binding domain;; Dehydrogenase E1 component	Probable 1-deoxy-D-xylulose-5-phosphate synthase, chloroplastic (Precursor) GN=TKT2 OS=Capsicum annuum (Bell pepper) PE=2 SV=1	PREDICTED: probable 1-deoxy-D-xylulose-5-phosphate synthase, chloroplastic [Beta vulgaris subsp. vulgaris]
c20718.graph_c0	--	--	--	--	--	--	Zinc finger, C3HC4 type (RING finger)	--	PREDICTED: uncharacterized protein LOC104883229 [Beta vulgaris subsp. vulgaris]
c41843.graph_c0	--	--	--	--	--	--	--	--	hypothetical protein CICLE_v10033003mg [Citrus clementina]
c40790.graph_c0	--	--	--	--	[R]	General function prediction only	Reverse transcriptase (RNA-dependent DNA polymerase);; Integrase core domain;; gag-polypeptide of LTR copia-type;; Retrotransposon gag protein	Endonuclease OS=Nicotiana tabacum (Common tobacco) PE=2 SV=1	hypothetical protein VITISV_035665 [Vitis vinifera]
c15924.graph_c0	--	--	Molecular Function: protein serine/threonine kinase activity (GO:0004674);; Molecular Function: ATP binding (GO:0005524);; Biological Process: protein phosphorylation (GO:0006468);;	--	--	--	Protein tyrosine kinase;; Protein kinase domain	Putative cysteine-rich receptor-like protein kinase 12 (Precursor) GN=CRK12 OS=Arabidopsis thaliana (Mouse-ear cress) PE=3 SV=2	PREDICTED: putative receptor-like protein kinase At4g00960 [Beta vulgaris subsp. vulgaris]
c79216.graph_c0	--	--	--	K02726|6e-06|cme:CML273C|20S core proteasome subunit alpha 2	[O]	Posttranslational modification, protein turnover, chaperones	--	--	--
c72643.graph_c0	--	--	--	--	[R]	General function prediction only	--	--	PREDICTED: uncharacterized protein LOC104902763 [Beta vulgaris subsp. vulgaris]
c76139.graph_c0	--	--	--	--	--	--	--	Ribosomal protein S4, mitochondrial GN=RPS4 OS=Arabidopsis thaliana (Mouse-ear cress) PE=2 SV=2	unnamed protein product [Triticum aestivum]
c12653.graph_c0	--	--	Biological Process: post-embryonic development (GO:0009791);; Biological Process: reproductive structure development (GO:0048608);;	--	--	--	Helix-loop-helix DNA-binding domain	Transcription factor SPATULA OS=Arabidopsis thaliana (Mouse-ear cress) PE=1 SV=1	PREDICTED: transcription factor ALC-like [Beta vulgaris subsp. vulgaris]
c11080.graph_c0	--	--	Biological Process: protein folding (GO:0006457);; Biological Process: response to stress (GO:0006950);; Molecular Function: heat shock protein binding (GO:0031072);; Biological Process: photoperiodism, flowering (GO:0048573);;	--	[O]	Posttranslational modification, protein turnover, chaperones	DnaJ domain	--	PREDICTED: uncharacterized protein LOC104894862 [Beta vulgaris subsp. vulgaris]
c28540.graph_c0	--	--	--	--	[R]	General function prediction only	--	--	PREDICTED: uncharacterized protein LOC104883442 [Beta vulgaris subsp. vulgaris]
c29869.graph_c0	--	--	Molecular Function: acetylglucosaminyltransferase activity (GO:0008375);; Cellular Component: membrane (GO:0016020);;	--	--	--	Core-2/I-Branching enzyme	--	PREDICTED: uncharacterized protein LOC104886683 [Beta vulgaris subsp. vulgaris]
c41763.graph_c0	--	--	--	--	--	--	--	--	PREDICTED: uncharacterized protein LOC103626742 [Zea mays]
c35830.graph_c0	--	--	--	--	[R]	General function prediction only	--	--	PREDICTED: uncharacterized protein LOC104885391 [Beta vulgaris subsp. vulgaris]
c20611.graph_c1	[J]	Translation, ribosomal structure and biogenesis	Molecular Function: structural constituent of ribosome (GO:0003735);; Biological Process: DNA-templated transcription, elongation (GO:0006354);; Biological Process: translation (GO:0006412);; Cellular Component: chloroplast (GO:0009507);; Cellular Component: large ribosomal subunit (GO:0015934);;	--	[J]	Translation, ribosomal structure and biogenesis	Ribosomal protein L1p/L10e family	50S ribosomal protein L1, chloroplastic (Precursor) GN=RPL1 OS=Arabidopsis thaliana (Mouse-ear cress) PE=1 SV=1	PREDICTED: 50S ribosomal protein L1, chloroplastic [Beta vulgaris subsp. vulgaris]
c40406.graph_c0	--	--	--	--	--	--	MULE transposase domain;; FAR1 DNA-binding domain	Protein FAR1-RELATED SEQUENCE 5 GN=FRS5 OS=Arabidopsis thaliana (Mouse-ear cress) PE=2 SV=1	PREDICTED: protein FAR1-RELATED SEQUENCE 5-like, partial [Beta vulgaris subsp. vulgaris]
c36917.graph_c0	[M]	Cell wall/membrane/envelope biogenesis	--	--	--	--	Mechanosensitive ion channel	Mechanosensitive ion channel protein 2, chloroplastic (Precursor) GN=MSL2 OS=Arabidopsis thaliana (Mouse-ear cress) PE=2 SV=1	PREDICTED: mechanosensitive ion channel protein 2, chloroplastic isoform X1 [Beta vulgaris subsp. vulgaris]
c20902.graph_c0	[RTKL]	--	Molecular Function: protein serine/threonine kinase activity (GO:0004674);; Molecular Function: ATP binding (GO:0005524);; Biological Process: protein phosphorylation (GO:0006468);;	K02218|2e-94|vvi:100261234|hypothetical protein LOC100261234	[T]	Signal transduction mechanisms	--	Casein kinase I isoform delta-like GN=At4g26100 OS=Arabidopsis thaliana (Mouse-ear cress) PE=2 SV=2	PREDICTED: casein kinase I isoform delta-like [Beta vulgaris subsp. vulgaris]
c28512.graph_c0	--	--	--	--	--	--	NHL repeat	--	PREDICTED: uncharacterized protein LOC104899426 isoform X1 [Beta vulgaris subsp. vulgaris]
c41651.graph_c0	[R]	General function prediction only	Molecular Function: DNA binding (GO:0003677);; Molecular Function: sequence-specific DNA binding transcription factor activity (GO:0003700);; Molecular Function: protein binding (GO:0005515);; Molecular Function: GTP binding (GO:0005525);; Cellular Component: nucleus (GO:0005634);; Cellular Component: Golgi stack (GO:0005795);; Cellular Component: plasma membrane (GO:0005886);; Biological Process…	K07942|1e-120|vvi:100249651|hypothetical protein LOC100249651	[U]	Intracellular trafficking, secretion, and vesicular transport	ADP-ribosylation factor family;; Ras family;; Signal recognition particle receptor beta subunit;; Gtr1/RagA G protein conserved region;; Miro-like protein;; 50S ribosome-binding GTPase	ADP-ribosylation factor 1 GN=ARF1 OS=Brassica rapa subsp. pekinensis (Chinese cabbage) PE=2 SV=3	PREDICTED: ADP-ribosylation factor 1 [Beta vulgaris subsp. vulgaris]
c37122.graph_c0	--	--	--	--	--	--	--	--	BnaC09g26910D [Brassica napus]
c33983.graph_c0	[IR]	--	Biological Process: lipid metabolic process (GO:0006629);; Molecular Function: hydrolase activity, acting on ester bonds (GO:0016788);;	--	--	--	GDSL-like Lipase/Acylhydrolase	GDSL esterase/lipase At1g71691 (Precursor) GN=At1g71691 OS=Arabidopsis thaliana (Mouse-ear cress) PE=2 SV=1	PREDICTED: GDSL esterase/lipase At1g71691 [Beta vulgaris subsp. vulgaris]
c74859.graph_c0	--	--	--	--	--	--	--	--	PREDICTED: uncharacterized protein LOC104898613 [Beta vulgaris subsp. vulgaris]
c39427.graph_c0	--	--	--	--	--	--	--	--	PREDICTED: uncharacterized protein LOC104887544 isoform X1 [Beta vulgaris subsp. vulgaris]
c29838.graph_c0	[O]	Posttranslational modification, protein turnover, chaperones	Molecular Function: ATP binding (GO:0005524);; Cellular Component: cell wall (GO:0005618);; Cellular Component: cytoplasm (GO:0005737);; Biological Process: protein folding (GO:0006457);; Cellular Component: anchored component of plasma membrane (GO:0046658);; Molecular Function: unfolded protein binding (GO:0051082);;	K09494|0.0|sbi:SORBI_03g009490|hypothetical protein	[O]	Posttranslational modification, protein turnover, chaperones	TCP-1/cpn60 chaperonin family	T-complex protein 1 subunit beta {ECO:0000303|PubMed:11599560} OS=Arabidopsis thaliana (Mouse-ear cress) PE=1 SV=1	PREDICTED: T-complex protein 1 subunit beta [Beta vulgaris subsp. vulgaris]
c60127.graph_c0	--	--	--	--	--	--	--	--	PREDICTED: uncharacterized protein LOC104889931 [Beta vulgaris subsp. vulgaris]
c78910.graph_c0	--	--	--	--	--	--	Domain of unknown function (DUF2828)	--	PREDICTED: uncharacterized protein LOC104888081 [Beta vulgaris subsp. vulgaris]
c31343.graph_c0	--	--	--	K09285|1e-123|vvi:100256589|hypothetical protein LOC100256589	--	--	AP2 domain	AP2-like ethylene-responsive transcription factor AIL6 GN=AIL6 OS=Arabidopsis thaliana (Mouse-ear cress) PE=2 SV=1	PREDICTED: AP2-like ethylene-responsive transcription factor AIL6 [Beta vulgaris subsp. vulgaris]
c74091.graph_c0	--	--	Biological Process: lipid transport (GO:0006869);; Molecular Function: lipid binding (GO:0008289);; Cellular Component: anchored component of membrane (GO:0031225);;	--	--	--	Probable lipid transfer;; Protease inhibitor/seed storage/LTP family	Lipid transfer-like protein VAS (Precursor) GN=VAS OS=Arabidopsis thaliana (Mouse-ear cress) PE=2 SV=1	PREDICTED: lipid transfer-like protein VAS [Beta vulgaris subsp. vulgaris]
c11485.graph_c0	[R]	General function prediction only	--	K04508|0.0|vvi:100256008|hypothetical protein LOC100256008	[B]	Chromatin structure and dynamics	WD domain, G-beta repeat;; Eukaryotic translation initiation factor eIF2A	Dynein assembly factor with WDR repeat domains 1 GN=DAW1 OS=Chlamydomonas reinhardtii (Chlamydomonas smithii) PE=1 SV=1	PREDICTED: F-box-like/WD repeat-containing protein TBL1Y isoform X3 [Beta vulgaris subsp. vulgaris]
c41583.graph_c0	[R]	General function prediction only	Molecular Function: carboxylic ester hydrolase activity (GO:0004091);; Cellular Component: cytoplasmic membrane-bounded vesicle (GO:0016023);; Molecular Function: S-formylglutathione hydrolase activity (GO:0018738);; Biological Process: formaldehyde catabolic process (GO:0046294);; Cellular Component: apoplast (GO:0048046);;	K01070|0.0|vvi:100253701|hypothetical protein LOC100253701	[R]	General function prediction only	Putative esterase;; Prolyl oligopeptidase family;; Alpha/beta hydrolase family	S-formylglutathione hydrolase GN=SFGH OS=Arabidopsis thaliana (Mouse-ear cress) PE=1 SV=2	PREDICTED: S-formylglutathione hydrolase [Beta vulgaris subsp. vulgaris]
c71005.graph_c0	--	--	--	--	--	--	--	--	PREDICTED: wall-associated receptor kinase-like 8 [Beta vulgaris subsp. vulgaris]
c38703.graph_c0	--	--	--	--	[S]	Function unknown	CG-1 domain;; Ankyrin repeats (3 copies);; IQ calmodulin-binding motif;; Ankyrin repeats (many copies);; IPT/TIG domain;; Ankyrin repeat	Calmodulin-binding transcription activator 2 GN=MSJ1.6 OS=Arabidopsis thaliana (Mouse-ear cress) PE=1 SV=1	PREDICTED: calmodulin-binding transcription activator 2 isoform X2 [Beta vulgaris subsp. vulgaris]
c24936.graph_c0	--	--	--	--	--	--	--	--	XRCC3 DNA recombinase [Micromonas sp. RCC299]
c38779.graph_c0	--	--	Cellular Component: mitochondrion (GO:0005739);; Biological Process: lipid biosynthetic process (GO:0008610);; Biological Process: organic cyclic compound biosynthetic process (GO:1901362);;	--	[R]	General function prediction only	C2 domain	Synaptotagmin-1 OS=Arabidopsis thaliana (Mouse-ear cress) PE=1 SV=2	calcium lipid binding protein, putative [Ricinus communis]
c39375.graph_c0	[FR]	--	Molecular Function: hydrolase activity, acting on carbon-nitrogen (but not peptide) bonds (GO:0016810);; Molecular Function: atrazine chlorohydrolase activity (GO:0018788);;	--	[FQ]	--	Amidohydrolase;; Amidohydrolase family;; Amidohydrolase family;; Amidohydrolase family	--	PREDICTED: uncharacterized protein C1F8.04c-like isoform X1 [Beta vulgaris subsp. vulgaris]
c40762.graph_c0	--	--	--	--	[S]	Function unknown	RPAP1-like, C-terminal;; RPAP1-like, N-terminal	--	PREDICTED: uncharacterized protein LOC104903869 [Beta vulgaris subsp. vulgaris]
c46718.graph_c0	[Q]	Secondary metabolites biosynthesis, transport and catabolism	Molecular Function: monooxygenase activity (GO:0004497);; Molecular Function: iron ion binding (GO:0005506);; Molecular Function: electron carrier activity (GO:0009055);; Molecular Function: oxidoreductase activity, acting on paired donors, with incorporation or reduction of molecular oxygen (GO:0016705);; Molecular Function: heme binding (GO:0020037);; Biological Process: oxidation-reduction pro…	--	[QI]	--	Cytochrome P450	Cytochrome P450 94A2 GN=CYP94A2 OS=Vicia sativa (Spring vetch) PE=2 SV=1	PREDICTED: cytochrome P450 94A1-like [Beta vulgaris subsp. vulgaris]
c29751.graph_c0	--	--	Molecular Function: structural constituent of ribosome (GO:0003735);; Cellular Component: ribosome (GO:0005840);; Biological Process: translation (GO:0006412);;	K02993|3e-43|vvi:100252536|hypothetical protein LOC100252536	[J]	Translation, ribosomal structure and biogenesis	Ribosomal protein S7e	40S ribosomal protein S7 GN=RPS7 OS=Avicennia marina (Grey mangrove) PE=2 SV=1	PREDICTED: 40S ribosomal protein S7 [Beta vulgaris subsp. vulgaris]
c9736.graph_c0	--	--	--	--	--	--	--	--	hypothetical protein CISIN_1g035095mg [Citrus sinensis]
c69087.graph_c0	--	--	--	--	--	--	Protein of unknown function (DUF295)	Putative F-box protein At1g65770 GN=At1g65770 OS=Arabidopsis thaliana (Mouse-ear cress) PE=4 SV=1	PREDICTED: uncharacterized protein LOC104894667 [Beta vulgaris subsp. vulgaris]
c32928.graph_c0	--	--	Cellular Component: mitochondrion (GO:0005739);;	--	[X]	--	Uncharacterised protein family UPF0546	--	PREDICTED: transmembrane protein 234 homolog [Beta vulgaris subsp. vulgaris]
c41670.graph_c0	--	--	Cellular Component: cytoplasmic membrane-bounded vesicle (GO:0016023);;	--	--	--	--	--	PREDICTED: uncharacterized protein LOC104889013 [Beta vulgaris subsp. vulgaris]
c68852.graph_c0	--	--	--	--	--	--	ABC transporter transmembrane region 2	--	--
c38350.graph_c1	--	--	--	--	--	--	Domain of unknown function (DUF3406);; AIG1 family;; 50S ribosome-binding GTPase;; Septin	Translocase of chloroplast 132, chloroplastic GN=TOC132 OS=Arabidopsis thaliana (Mouse-ear cress) PE=1 SV=1	chloroplast preprotein import receptor Toc132 [Bienertia sinuspersici]
c41815.graph_c0	[U]	Intracellular trafficking, secretion, and vesicular transport	--	--	[U]	Intracellular trafficking, secretion, and vesicular transport	VID27 cytoplasmic protein	Protein CYPRO4 GN=CYPRO4 OS=Cynara cardunculus (Cardoon) PE=2 SV=1	PREDICTED: protein CYPRO4-like [Beta vulgaris subsp. vulgaris]
c30194.graph_c0	--	--	Molecular Function: phospholipase C activity (GO:0004629);; Biological Process: lipid metabolic process (GO:0006629);; Biological Process: intracellular signal transduction (GO:0035556);; Cellular Component: anchored component of plasma membrane (GO:0046658);;	--	--	--	Leucine Rich repeat;; F-box-like;; F-box domain	PI-PLC X domain-containing protein At5g67130 (Precursor) GN=At5g67130 OS=Arabidopsis thaliana (Mouse-ear cress) PE=1 SV=1	PREDICTED: PI-PLC X domain-containing protein At5g67130 [Beta vulgaris subsp. vulgaris]
c20971.graph_c0	[R]	General function prediction only	Biological Process: DNA-templated transcription, elongation (GO:0006354);; Cellular Component: chloroplast thylakoid membrane (GO:0009535);; Biological Process: photosystem I assembly (GO:0048564);; Molecular Function: unfolded protein binding (GO:0051082);;	--	[R]	General function prediction only	TPR repeat;; Tetratricopeptide repeat;; Tetratricopeptide repeat;; Tetratricopeptide repeat;; Tetratricopeptide repeat;; Tetratricopeptide repeat;; Tetratricopeptide repeat	Photosystem I assembly protein Ycf3 {ECO:0000255|HAMAP-Rule:MF_00439} OS=Spinacia oleracea (Spinach) PE=3 SV=1	photosystem I assembly protein Ycf3 [Lactuca sativa]
c24229.graph_c0	--	--	--	--	--	--	ATHILA ORF-1 family	--	PREDICTED: uncharacterized protein LOC104901480 [Beta vulgaris subsp. vulgaris]
c30909.graph_c0	[T]	Signal transduction mechanisms	Molecular Function: phosphorelay response regulator activity (GO:0000156);; Biological Process: phosphorelay signal transduction system (GO:0000160);; Biological Process: regulation of transcription, DNA-templated (GO:0006355);; Biological Process: intracellular signal transduction (GO:0035556);;	K14492|7e-66|pop:POPTR_693167|PtRR4	[K]	Transcription	Response regulator receiver domain	Two-component response regulator ARR9 GN=F24I3.120 OS=Arabidopsis thaliana (Mouse-ear cress) PE=1 SV=1	PREDICTED: two-component response regulator ARR9-like [Beta vulgaris subsp. vulgaris]
c33336.graph_c0	[R]	General function prediction only	Biological Process: coumarin biosynthetic process (GO:0009805);; Biological Process: lignin biosynthetic process (GO:0009809);; Biological Process: methylation (GO:0032259);; Molecular Function: caffeoyl-CoA O-methyltransferase activity (GO:0042409);; Biological Process: response to cadmium ion (GO:0046686);; Molecular Function: metal ion binding (GO:0046872);;	K00588|1e-159|pop:POPTR_649581|CAM1	[Q]	Secondary metabolites biosynthesis, transport and catabolism	O-methyltransferase;; Methyltransferase domain;; Methyltransferase domain	Caffeoyl-CoA O-methyltransferase OS=Populus tremuloides (Quaking aspen) PE=2 SV=1	PREDICTED: caffeoyl-CoA O-methyltransferase 1 [Populus euphratica]
c14343.graph_c0	[V]	Defense mechanisms	Molecular Function: ATP binding (GO:0005524);; Biological Process: ATP catabolic process (GO:0006200);; Molecular Function: xenobiotic-transporting ATPase activity (GO:0008559);; Molecular Function: peptide-transporting ATPase activity (GO:0015440);; Cellular Component: integral component of membrane (GO:0016021);; Biological Process: transmembrane transport (GO:0055085);;	--	[Q]	Secondary metabolites biosynthesis, transport and catabolism	ABC transporter transmembrane region;; ABC transporter;; RecF/RecN/SMC N terminal domain;; AAA domain;; AAA ATPase domain;; Predicted ATPase of the ABC class;; P-loop containing region of AAA domain;; AAA domain;; AAA domain;; Protein of unknown function, DUF258;; Domain of unknown function DUF87;; ATPase family associated with various cellular activities (AAA);; Zeta toxin;; Molybdopterin guanin…	ABC transporter B family member 13 GN=F13K9.5 OS=Arabidopsis thaliana (Mouse-ear cress) PE=3 SV=1	PREDICTED: uncharacterized protein LOC104905624 [Beta vulgaris subsp. vulgaris]
c31291.graph_c0	[R]	General function prediction only	--	--	[S]	Function unknown	WD domain, G-beta repeat	Protein DAMAGED DNA-BINDING 2 GN=DDB2 OS=Arabidopsis thaliana (Mouse-ear cress) PE=1 SV=1	PREDICTED: WD repeat-containing protein 76 [Beta vulgaris subsp. vulgaris]
c19087.graph_c0	--	--	--	--	--	--	--	--	PREDICTED: uncharacterized protein LOC104609040 [Nelumbo nucifera]
c31266.graph_c0	--	--	--	--	--	--	--	--	PREDICTED: uncharacterized protein LOC104883312 [Beta vulgaris subsp. vulgaris]
c38988.graph_c0	--	--	--	--	[P]	Inorganic ion transport and metabolism	Domain of unknown function (DUF1984);; Domain of unknown function (DUF1984)	Glutathione gamma-glutamylcysteinyltransferase 1 GN=PCS1 OS=Lotus japonicus (Lotus corniculatus var. japonicus) PE=2 SV=1	PREDICTED: glutathione gamma-glutamylcysteinyltransferase 1-like isoform X1 [Beta vulgaris subsp. vulgaris]
c39163.graph_c0	--	--	Cellular Component: cell part (GO:0044464);;	--	--	--	Protein of unknown function (DUF4005);; IQ calmodulin-binding motif	Protein IQ-DOMAIN 31 GN=IQD31 OS=Arabidopsis thaliana (Mouse-ear cress) PE=1 SV=1	PREDICTED: protein IQ-DOMAIN 31 isoform X1 [Beta vulgaris subsp. vulgaris]
c17916.graph_c0	--	--	--	--	--	--	Leucine rich repeat;; Leucine Rich repeats (2 copies);; Leucine Rich Repeat	Probable receptor protein kinase TMK1 (Precursor) GN=TMK1 OS=Arabidopsis thaliana (Mouse-ear cress) PE=1 SV=1	PREDICTED: probable receptor protein kinase TMK1 [Beta vulgaris subsp. vulgaris]
c38472.graph_c0	--	--	Molecular Function: DNA binding (GO:0003677);; Molecular Function: protein dimerization activity (GO:0046983);;	--	--	--	Domain of unknown function (DUF4371)	--	PREDICTED: zinc finger MYM-type protein 1-like [Beta vulgaris subsp. vulgaris]
c42263.graph_c0	[Z]	Cytoskeleton	Molecular Function: structural constituent of cytoskeleton (GO:0005200);; Molecular Function: ATP binding (GO:0005524);; Cellular Component: cell wall (GO:0005618);; Cellular Component: nucleolus (GO:0005730);; Cellular Component: mitochondrion (GO:0005739);; Cellular Component: cytosol (GO:0005829);; Cellular Component: cytoskeleton (GO:0005856);; Cellular Component: plasma membrane (GO:0005886)…	--	[Z]	Cytoskeleton	Actin	Actin-7 GN=ACT7 OS=Arabidopsis thaliana (Mouse-ear cress) PE=1 SV=1	PREDICTED: actin-7-like [Beta vulgaris subsp. vulgaris]
c14326.graph_c0	--	--	--	--	[TZ]	--	PDZ domain (Also known as DHR or GLGF)	Proline-rich receptor-like protein kinase PERK1 GN=PERK1 OS=Arabidopsis thaliana (Mouse-ear cress) PE=2 SV=1	hypothetical protein CFIO01_12800 [Colletotrichum fioriniae PJ7]
c18590.graph_c0	--	--	--	--	--	--	--	--	PREDICTED: uncharacterized protein LOC104895613 [Beta vulgaris subsp. vulgaris]
c35693.graph_c0	--	--	--	--	--	--	Seed maturation protein	Late embryogenesis abundant protein D-34 OS=Gossypium hirsutum (Upland cotton) PE=4 SV=1	PREDICTED: late embryogenesis abundant protein D-34-like [Beta vulgaris subsp. vulgaris]
c77701.graph_c0	[C]	Energy production and conversion	Molecular Function: retinal dehydrogenase activity (GO:0001758);; Molecular Function: ATP binding (GO:0005524);; Cellular Component: mitochondrion (GO:0005739);; Cellular Component: chloroplast (GO:0009507);; Biological Process: response to cadmium ion (GO:0046686);; Biological Process: oxidation-reduction process (GO:0055114);;	K00128|3e-37|rcu:RCOM_0527300|aldehyde dehydrogenase, putative (EC:1.2.1.36)	[C]	Energy production and conversion	Aldehyde dehydrogenase family	Aldehyde dehydrogenase family 2 member B4, mitochondrial (Precursor) GN=T17F15.130 OS=Arabidopsis thaliana (Mouse-ear cress) PE=2 SV=1	PREDICTED: aldehyde dehydrogenase family 2 member B7, mitochondrial-like [Beta vulgaris subsp. vulgaris]
c11254.graph_c0	[F]	Nucleotide transport and metabolism	Molecular Function: formate-tetrahydrofolate ligase activity (GO:0004329);; Molecular Function: copper ion binding (GO:0005507);; Molecular Function: ATP binding (GO:0005524);; Cellular Component: plasma membrane (GO:0005886);; Biological Process: folic acid-containing compound biosynthetic process (GO:0009396);; Cellular Component: chloroplast (GO:0009507);; Biological Process: tetrahydrofolate …	--	--	--	Formate--tetrahydrofolate ligase	Formate--tetrahydrofolate ligase OS=Spinacia oleracea (Spinach) PE=1 SV=3	RecName: Full=Formate--tetrahydrofolate ligase; AltName: Full=10-formyletrahydrofolate synthetase; Short=FHS; Short=FTHFS; AltName: Full=Formyltetrahydrofolate synthetase [Spinacia oleracea]
c31755.graph_c0	[Q]	Secondary metabolites biosynthesis, transport and catabolism	Molecular Function: binding (GO:0005488);; Molecular Function: oxidoreductase activity (GO:0016491);;	--	[QI]	--	Cytochrome P450;; Cytochrome P450	Cytochrome P450 72A15 GN=CYP72A15 OS=Arabidopsis thaliana (Mouse-ear cress) PE=2 SV=1	PREDICTED: cytochrome P450 CYP72A219-like [Beta vulgaris subsp. vulgaris]
c53745.graph_c0	--	--	--	--	[R]	General function prediction only	Reverse transcriptase (RNA-dependent DNA polymerase)	--	orf129a gene product (mitochondrion) [Beta vulgaris subsp. vulgaris]
c52367.graph_c0	--	--	--	--	--	--	--	--	retrotransposon protein putative ty3-gypsy sub-class [Cucumis melo subsp. melo]
c10953.graph_c0	[J]	Translation, ribosomal structure and biogenesis	Molecular Function: hydrolase activity, acting on carbon-nitrogen (but not peptide) bonds, in linear amides (GO:0016811);; Biological Process: primary metabolic process (GO:0044238);; Biological Process: cellular biosynthetic process (GO:0044249);; Biological Process: organic substance biosynthetic process (GO:1901576);;	K01462|1e-109|vvi:100250707|hypothetical protein LOC100250707	[J]	Translation, ribosomal structure and biogenesis	Polypeptide deformylase	Peptide deformylase 1B, chloroplastic/mitochondrial (Precursor) GN=T15N1_150 OS=Arabidopsis thaliana (Mouse-ear cress) PE=1 SV=2	PREDICTED: peptide deformylase 1B, chloroplastic/mitochondrial [Beta vulgaris subsp. vulgaris]
c31839.graph_c0	[U]	Intracellular trafficking, secretion, and vesicular transport	--	--	[U]	Intracellular trafficking, secretion, and vesicular transport	--	Vesicle-associated protein 2-2, N-terminally processed GN=F22O13.31 OS=Arabidopsis thaliana (Mouse-ear cress) PE=1 SV=1	PREDICTED: vesicle-associated protein 2-2-like isoform X2 [Beta vulgaris subsp. vulgaris]
c52567.graph_c0	--	--	--	--	[I]	Lipid transport and metabolism	Male sterility protein;; Male sterility protein	Fatty acyl-CoA reductase 2 OS=Arabidopsis thaliana (Mouse-ear cress) PE=2 SV=2	PREDICTED: fatty acyl-CoA reductase 6, chloroplastic-like [Tarenaya hassleriana]
c76580.graph_c0	--	--	Molecular Function: transferase activity (GO:0016740);;	--	--	--	--	--	PREDICTED: probable serine/threonine-protein kinase At1g18390 isoform X3 [Beta vulgaris subsp. vulgaris]
c16319.graph_c0	[O]	Posttranslational modification, protein turnover, chaperones	--	--	[O]	Posttranslational modification, protein turnover, chaperones	DnaJ C terminal domain	DnaJ protein homolog 1 (Precursor; Fragment) GN=DNAJ1 OS=Allium porrum (Leek) PE=2 SV=1	PREDICTED: dnaJ homolog subfamily B member 1-like [Beta vulgaris subsp. vulgaris]
c45390.graph_c0	--	--	--	--	[R]	General function prediction only	--	Pentatricopeptide repeat-containing protein At2g02750 GN=PCMP-E22 OS=Arabidopsis thaliana (Mouse-ear cress) PE=2 SV=2	PREDICTED: pentatricopeptide repeat-containing protein At2g02750 [Beta vulgaris subsp. vulgaris]
c30122.graph_c0	--	--	--	--	[Z]	Cytoskeleton	Myosin tail	WEB family protein At5g16730, chloroplastic (Precursor) GN=At5g16730 OS=Arabidopsis thaliana (Mouse-ear cress) PE=1 SV=1	Myosin tail domain-containing protein [Rozella allomycis CSF55]
c76915.graph_c0	[NU]	--	Biological Process: ciliary or bacterial-type flagellar motility (GO:0001539);; Molecular Function: motor activity (GO:0003774);; Biological Process: chemotaxis (GO:0006935);; Cellular Component: bacterial-type flagellum basal body (GO:0009425);; Cellular Component: membrane (GO:0016020);;	--	--	--	Surface presentation of antigens (SPOA)	--	Flagellar motor switch protein FliM [Beauveria bassiana D1-5]
c32393.graph_c0	[S]	Function unknown	--	--	--	--	Leucine Rich Repeat;; Leucine Rich repeat;; Leucine Rich repeats (2 copies);; Leucine rich repeat;; Leucine rich repeat N-terminal domain;; Leucine rich repeat	Probable LRR receptor-like serine/threonine-protein kinase At4g37250 (Precursor) GN=At4g37250 OS=Arabidopsis thaliana (Mouse-ear cress) PE=2 SV=1	PREDICTED: probable LRR receptor-like serine/threonine-protein kinase At4g37250 [Beta vulgaris subsp. vulgaris]
c32717.graph_c0	--	--	Cellular Component: mediator complex (GO:0016592);;	K11778|2e-65|vvi:100241757|hypothetical protein LOC100241757	--	--	--	Mediator of RNA polymerase II transcription subunit 32 GN=F25C20.9 OS=Arabidopsis thaliana (Mouse-ear cress) PE=1 SV=1	PREDICTED: mediator of RNA polymerase II transcription subunit 32-like [Beta vulgaris subsp. vulgaris]
c21039.graph_c0	[H]	Coenzyme transport and metabolism	Molecular Function: thiamine-phosphate diphosphorylase activity (GO:0004789);; Molecular Function: hydroxymethylpyrimidine kinase activity (GO:0008902);; Molecular Function: phosphomethylpyrimidine kinase activity (GO:0008972);; Biological Process: thiamine biosynthetic process (GO:0009228);; Cellular Component: chloroplast stroma (GO:0009570);;	K14153|0.0|vvi:100249214|hypothetical protein LOC100249214	[HK]	--	Thiamine monophosphate synthase/TENI;; Phosphomethylpyrimidine kinase;; pfkB family carbohydrate kinase;; Phosphomethylpyrimidine kinase	Hydroxymethylpyrimidine kinase (Precursor) GN=TH1 OS=Arabidopsis thaliana (Mouse-ear cress) PE=1 SV=1	PREDICTED: thiamine biosynthetic bifunctional enzyme TH1, chloroplastic isoform X1 [Beta vulgaris subsp. vulgaris]
c31984.graph_c0	--	--	--	--	--	--	--	--	PREDICTED: uncharacterized protein LOC104891532 [Beta vulgaris subsp. vulgaris]
c41055.graph_c0	[J]	Translation, ribosomal structure and biogenesis	Molecular Function: translation initiation factor activity (GO:0003743);; Biological Process: translational initiation (GO:0006413);;	--	[J]	Translation, ribosomal structure and biogenesis	Translation initiation factor SUI1	Protein translation factor SUI1 homolog OS=Sporobolus stapfianus (Ressurection grass) PE=3 SV=1	PREDICTED: protein translation factor SUI1 homolog [Beta vulgaris subsp. vulgaris]
c78223.graph_c0	[S]	Function unknown	--	--	--	--	--	--	--
c34584.graph_c0	[R]	General function prediction only	Molecular Function: voltage-gated potassium channel activity (GO:0005249);; Biological Process: potassium ion transport (GO:0006813);; Cellular Component: integral component of membrane (GO:0016021);; Biological Process: transmembrane transport (GO:0055085);;	--	[PT]	--	Ankyrin repeats (3 copies);; Ankyrin repeat;; Ankyrin repeats (many copies);; Ankyrin repeats (many copies);; Ankyrin repeat;; Cyclic nucleotide-binding domain;; Ion transport protein;; Domain of unknown function (DUF3354);; Ion channel	Potassium channel SKOR GN=SKOR OS=Arabidopsis thaliana (Mouse-ear cress) PE=1 SV=1	PREDICTED: potassium channel SKOR [Beta vulgaris subsp. vulgaris]
c29259.graph_c0	--	--	--	--	--	--	Domain of unknown function (DUF4283)	--	PREDICTED: uncharacterized protein LOC104896742 [Beta vulgaris subsp. vulgaris]
c29993.graph_c0	[R]	General function prediction only	--	K09553|0.0|rcu:RCOM_1679700|heat shock protein 70 (HSP70)-interacting protein, putative	[O]	Posttranslational modification, protein turnover, chaperones	TPR repeat;; Tetratricopeptide repeat;; Tetratricopeptide repeat;; Tetratricopeptide repeat;; Tetratricopeptide repeat;; Tetratricopeptide repeat;; Tetratricopeptide repeat;; Tetratricopeptide repeat;; Tetratricopeptide repeat;; Tetratricopeptide repeat;; Tetratricopeptide repeat;; Anaphase-promoting complex, cyclosome, subunit 3;; Tetratricopeptide repeat	Hsp70-Hsp90 organizing protein 2 GN=HOP2 OS=Arabidopsis thaliana (Mouse-ear cress) PE=2 SV=1	PREDICTED: hsp70-Hsp90 organizing protein 3 [Beta vulgaris subsp. vulgaris]
c37121.graph_c1	[GEPR]	--	Biological Process: response to karrikin (GO:0080167);;	--	--	--	Nodulin-like	--	PREDICTED: probable transporter mch1 [Beta vulgaris subsp. vulgaris]
c2847.graph_c0	--	--	--	--	--	--	--	F-box/LRR-repeat protein At5g63520 GN=At5g63520 OS=Arabidopsis thaliana (Mouse-ear cress) PE=2 SV=1	hypothetical protein JCGZ_26431 [Jatropha curcas]
c52430.graph_c0	--	--	--	--	--	--	GAG-pre-integrase domain	--	--
c22991.graph_c1	--	--	Molecular Function: organic cyclic compound binding (GO:0097159);; Molecular Function: heterocyclic compound binding (GO:1901363);;	--	--	--	--	--	RNA-directed DNA polymerase [Arachis hypogaea]
c39039.graph_c0	--	--	--	--	--	--	Dehydrin	Embryogenic cell protein 40 GN=ECP40 OS=Daucus carota (Wild carrot) PE=1 SV=1	RecName: Full=Embryogenic cell protein 40; Short=ECP40 [Daucus carota]
c41221.graph_c0	[EH]	--	Molecular Function: magnesium ion binding (GO:0000287);; Biological Process: metabolic process (GO:0008152);; Molecular Function: oxalyl-CoA decarboxylase activity (GO:0008949);; Molecular Function: thiamine pyrophosphate binding (GO:0030976);;	K12261|0.0|vvi:100232933|OXC	[EH]	--	Thiamine pyrophosphate enzyme, N-terminal TPP binding domain;; Thiamine pyrophosphate enzyme, central domain;; Thiamine pyrophosphate enzyme, C-terminal TPP binding domain	2-hydroxyacyl-CoA lyase GN=T10B6.40 OS=Arabidopsis thaliana (Mouse-ear cress) PE=1 SV=1	PREDICTED: 2-hydroxyacyl-CoA lyase [Beta vulgaris subsp. vulgaris]
c39536.graph_c0	--	--	--	--	--	--	--	FBD-associated F-box protein At5g60610 GN=At5g60610 OS=Arabidopsis thaliana (Mouse-ear cress) PE=2 SV=1	PREDICTED: F-box/LRR-repeat protein At3g59200-like [Beta vulgaris subsp. vulgaris]
c41968.graph_c0	[H]	Coenzyme transport and metabolism	Molecular Function: N2-acetyl-L-ornithine:2-oxoglutarate 5-aminotransferase activity (GO:0003992);; Cellular Component: mitochondrion (GO:0005739);; Cellular Component: plasma membrane (GO:0005886);; Biological Process: glutamate decarboxylation to succinate (GO:0006540);; Biological Process: response to oxidative stress (GO:0006979);; Molecular Function: zinc ion binding (GO:0008270);; Biologica…	--	[E]	Amino acid transport and metabolism	Aminotransferase class-III	Gamma aminobutyrate transaminase 3, chloroplastic (Precursor) GN=GABA-TP3 OS=Solanum lycopersicum (Tomato) PE=1 SV=1	PREDICTED: gamma aminobutyrate transaminase 1, mitochondrial [Beta vulgaris subsp. vulgaris]
c64895.graph_c0	--	--	--	--	[A]	RNA processing and modification	--	--	hypothetical protein EUTSA_v10016123mg [Eutrema salsugineum]
c60898.graph_c0	[O]	Posttranslational modification, protein turnover, chaperones	Molecular Function: ATP binding (GO:0005524);; Biological Process: response to stress (GO:0006950);;	--	[O]	Posttranslational modification, protein turnover, chaperones	Hsp70 protein;; NAD-specific glutamate dehydrogenase	Heat shock 70 kDa protein GN=HSP70 OS=Pyrenomonas salina PE=3 SV=1	heat shock protein 70 [Pneumocystis murina]
c79258.graph_c0	--	--	--	--	--	--	--	--	PREDICTED: transcription factor EGL1 [Beta vulgaris subsp. vulgaris]
c35486.graph_c0	[O]	Posttranslational modification, protein turnover, chaperones	Biological Process: ubiquitin-dependent protein catabolic process (GO:0006511);; Molecular Function: ligase activity (GO:0016874);;	--	[O]	Posttranslational modification, protein turnover, chaperones	Skp1 family, dimerisation domain;; Skp1 family, tetramerisation domain	SKP1-like protein 20 GN=ASK20 OS=Arabidopsis thaliana (Mouse-ear cress) PE=2 SV=1	PREDICTED: SKP1-like protein 21 [Beta vulgaris subsp. vulgaris]
c37551.graph_c0	[O]	Posttranslational modification, protein turnover, chaperones	Molecular Function: ATP binding (GO:0005524);; Biological Process: ATP catabolic process (GO:0006200);; Molecular Function: microtubule-severing ATPase activity (GO:0008568);;	--	[O]	Posttranslational modification, protein turnover, chaperones	ATPase family associated with various cellular activities (AAA);; Vps4 C terminal oligomerisation domain;; AAA domain (dynein-related subfamily);; Holliday junction DNA helicase ruvB N-terminus	Katanin p60 ATPase-containing subunit A1 {ECO:0000255|HAMAP-Rule:MF_03023} GN=At1g80350 OS=Arabidopsis thaliana (Mouse-ear cress) PE=1 SV=1	PREDICTED: fidgetin-like protein 1 [Beta vulgaris subsp. vulgaris]
c32853.graph_c0	[G]	Carbohydrate transport and metabolism	Molecular Function: 6-phosphofructokinase activity (GO:0003872);; Molecular Function: ATP binding (GO:0005524);; Cellular Component: 6-phosphofructokinase complex (GO:0005945);; Biological Process: glycolysis (GO:0006096);; Biological Process: phosphorylation (GO:0016310);; Molecular Function: diphosphate-fructose-6-phosphate 1-phosphotransferase activity (GO:0047334);;	K00895|0.0|vvi:100249662|similar to Pyrophosphate--fructose 6-phosphate 1-phosphotransferase subunit alpha	[G]	Carbohydrate transport and metabolism	Phosphofructokinase	Pyrophosphate--fructose 6-phosphate 1-phosphotransferase subunit alpha {ECO:0000255|HAMAP-Rule:MF_03185} OS=Ricinus communis (Castor bean) PE=3 SV=1	PREDICTED: pyrophosphate--fructose 6-phosphate 1-phosphotransferase subunit alpha [Beta vulgaris subsp. vulgaris]
c78850.graph_c0	--	--	--	--	--	--	--	--	PREDICTED: F-box protein At1g67340-like [Malus domestica]
c41252.graph_c0	--	--	--	--	[R]	General function prediction only	PPR repeat family;; PPR repeat;; PPR repeat;; Pentatricopeptide repeat domain;; Evolutionarily conserved signalling intermediate in Toll pathway;; Tetratricopeptide repeat;; Tetratricopeptide repeat;; Mitochondrial ATPase expression	Pentatricopeptide repeat-containing protein At5g21222 GN=ATC401 OS=Arabidopsis thaliana (Mouse-ear cress) PE=2 SV=1	PREDICTED: pentatricopeptide repeat-containing protein At5g25630-like [Beta vulgaris subsp. vulgaris]
c60123.graph_c0	--	--	--	--	--	--	--	--	PREDICTED: uncharacterized protein LOC104898613 [Beta vulgaris subsp. vulgaris]
c12450.graph_c0	[S]	Function unknown	Molecular Function: transferase activity (GO:0016740);;	K10532|0.0|pop:POPTR_898175|hypothetical protein	[S]	Function unknown	Protein of unknown function (DUF1624)	--	PREDICTED: heparan-alpha-glucosaminide N-acetyltransferase-like [Beta vulgaris subsp. vulgaris]
c42372.graph_c0	--	--	--	--	--	--	--	--	unnamed protein product [Coffea canephora]
c13532.graph_c0	--	--	Molecular Function: binding (GO:0005488);;	--	--	--	Domain of unknown function (DUF4371)	--	PREDICTED: zinc finger MYM-type protein 1-like [Beta vulgaris subsp. vulgaris]
c50891.graph_c0	--	--	--	--	[R]	General function prediction only	--	--	PREDICTED: uncharacterized protein LOC103344452, partial [Prunus mume]
c30792.graph_c0	--	--	--	--	--	--	--	--	hypothetical protein FG03188.1 [Fusarium graminearum PH-1]
c38739.graph_c0	--	--	--	--	--	--	F-box domain	F-box protein CPR30 GN=CPR30 OS=Arabidopsis thaliana (Mouse-ear cress) PE=1 SV=2	PREDICTED: F-box protein CPR30-like [Beta vulgaris subsp. vulgaris]
c20142.graph_c0	--	--	Cellular Component: endoplasmic reticulum (GO:0005783);; Cellular Component: plasma membrane (GO:0005886);;	--	--	--	Protein of unknown function (DUF3754)	--	PREDICTED: uncharacterized protein LOC104897659 [Beta vulgaris subsp. vulgaris]
c29812.graph_c0	[M]	Cell wall/membrane/envelope biogenesis	Molecular Function: zinc ion binding (GO:0008270);; Cellular Component: integral component of membrane (GO:0016021);; Molecular Function: cellulose synthase (UDP-forming) activity (GO:0016760);; Molecular Function: cellulose synthase (GDP-forming) activity (GO:0016761);; Biological Process: cellulose biosynthetic process (GO:0030244);;	K10999|0.0|pop:POPTR_835809|cellulose synthase (EC:2.4.1.12)	--	--	Cellulose synthase;; Glycosyl transferase family group 2;; Glycosyltransferase like family 2	Probable cellulose synthase A catalytic subunit 1 [UDP-forming] OS=Oryza sativa subsp. japonica (Rice) PE=2 SV=1	PREDICTED: cellulose synthase A catalytic subunit 1 [UDP-forming] [Beta vulgaris subsp. vulgaris]
c30021.graph_c0	--	--	Biological Process: rRNA processing (GO:0006364);; Biological Process: tRNA metabolic process (GO:0006399);; Cellular Component: chloroplast (GO:0009507);; Cellular Component: plastid chromosome (GO:0009508);; Biological Process: chloroplast relocation (GO:0009902);; Biological Process: leaf morphogenesis (GO:0009965);; Biological Process: thylakoid membrane organization (GO:0010027);; Biological…	--	[R]	General function prediction only	PPR repeat family;; PPR repeat;; Pentatricopeptide repeat domain;; PPR repeat;; Evolutionarily conserved signalling intermediate in Toll pathway;; Tetratricopeptide repeat;; Region in Clathrin and VPS	Pentatricopeptide repeat-containing protein At1g74850, chloroplastic (Precursor) GN=PTAC2 OS=Arabidopsis thaliana (Mouse-ear cress) PE=2 SV=1	PREDICTED: pentatricopeptide repeat-containing protein At1g74850, chloroplastic isoform X2 [Beta vulgaris subsp. vulgaris]
c46161.graph_c0	--	--	--	--	--	--	--	--	hypothetical protein MTR_1g005270 [Medicago truncatula]
c67437.graph_c0	--	--	--	--	[R]	General function prediction only	--	--	PREDICTED: uncharacterized protein LOC101301924, partial [Fragaria vesca subsp. vesca]
c44867.graph_c0	--	--	Molecular Function: methyltransferase activity (GO:0008168);; Biological Process: methylation (GO:0032259);;	--	--	--	Putative S-adenosyl-L-methionine-dependent methyltransferase;; Methyltransferase domain	Probable methyltransferase PMT15 GN=At4g00750 OS=Arabidopsis thaliana (Mouse-ear cress) PE=2 SV=1	PREDICTED: probable methyltransferase PMT15 [Beta vulgaris subsp. vulgaris]
c43339.graph_c0	--	--	--	--	--	--	--	--	hypothetical protein BDFG_07099 [Blastomyces dermatitidis ATCC 26199]
c31490.graph_c0	--	--	Biological Process: cellular process (GO:0009987);;	--	[K]	Transcription	SRF-type transcription factor (DNA-binding and dimerisation domain)	Agamous-like MADS-box protein AGL61 GN=F27C12.24 OS=Arabidopsis thaliana (Mouse-ear cress) PE=1 SV=1	PREDICTED: agamous-like MADS-box protein AGL62 [Nicotiana tomentosiformis]
c42522.graph_c0	[G]	Carbohydrate transport and metabolism	Molecular Function: trehalose-phosphatase activity (GO:0004805);; Biological Process: trehalose biosynthetic process (GO:0005992);;	--	[G]	Carbohydrate transport and metabolism	Trehalose-phosphatase	Probable trehalose-phosphate phosphatase H GN=TPPH OS=Arabidopsis thaliana (Mouse-ear cress) PE=2 SV=1	PREDICTED: probable trehalose-phosphate phosphatase D [Beta vulgaris subsp. vulgaris]
c21993.graph_c0	--	--	--	--	--	--	Seed dormancy control	--	PREDICTED: uncharacterized protein LOC104904703 [Beta vulgaris subsp. vulgaris]
c9365.graph_c0	--	--	--	--	--	--	--	--	hypothetical protein AMTR_s00143p00046720 [Amborella trichopoda]
c54088.graph_c0	--	--	--	--	--	--	--	--	PREDICTED: uncharacterized protein LOC104884259 [Beta vulgaris subsp. vulgaris]
c42400.graph_c0	--	--	Molecular Function: transporter activity (GO:0005215);; Biological Process: transport (GO:0006810);; Biological Process: cysteine biosynthetic process (GO:0019344);;	--	[I]	Lipid transport and metabolism	CRAL/TRIO domain;; Divergent CRAL/TRIO domain;; CRAL/TRIO, N-terminal domain	Patellin-6 GN=PATL6 OS=Arabidopsis thaliana (Mouse-ear cress) PE=2 SV=1	PREDICTED: random slug protein 5-like [Beta vulgaris subsp. vulgaris]
c10922.graph_c0	--	--	--	--	--	--	RNAse P Rpr2/Rpp21/SNM1 subunit domain	--	PREDICTED: uncharacterized protein LOC104883970 [Beta vulgaris subsp. vulgaris]
c41884.graph_c0	--	--	--	--	--	--	Domain of unknown function (DUF3598)	--	PREDICTED: uncharacterized protein LOC104887299 isoform X1 [Beta vulgaris subsp. vulgaris]
c65488.graph_c0	--	--	--	--	--	--	Zinc knuckle	--	hypothetical protein [Beta vulgaris subsp. vulgaris]
c166.graph_c1	--	--	--	--	--	--	--	--	PREDICTED: uncharacterized protein LOC104883809 [Beta vulgaris subsp. vulgaris]
c75543.graph_c0	--	--	--	--	--	--	--	--	PREDICTED: putative transcription factor bHLH041 [Beta vulgaris subsp. vulgaris]
c55716.graph_c0	--	--	Biological Process: MAPK cascade (GO:0000165);; Molecular Function: nucleotide binding (GO:0000166);; Molecular Function: protein kinase activity (GO:0004672);; Biological Process: protein phosphorylation (GO:0006468);; Cellular Component: membrane (GO:0016020);; Molecular Function: oxidoreductase activity (GO:0016491);;	--	--	--	--	Probable LRR receptor-like serine/threonine-protein kinase At4g08850 (Precursor) GN=At4g08850 OS=Arabidopsis thaliana (Mouse-ear cress) PE=2 SV=3	PREDICTED: probable LRR receptor-like serine/threonine-protein kinase At4g08850 [Beta vulgaris subsp. vulgaris]
c32729.graph_c0	[S]	Function unknown	Biological Process: phosphatidylinositol biosynthetic process (GO:0006661);;	--	[S]	Function unknown	SNARE associated Golgi protein	Uncharacterized membrane protein At4g09580 GN=At4g09580 OS=Arabidopsis thaliana (Mouse-ear cress) PE=1 SV=1	PREDICTED: uncharacterized membrane protein At4g09580 [Beta vulgaris subsp. vulgaris]
c71341.graph_c0	--	--	--	--	--	--	Immunoglobulin C1-set domain	--	--
c37291.graph_c0	[GOU]	--	Molecular Function: UDP-galactose transmembrane transporter activity (GO:0005459);; Molecular Function: UDP-glucose transmembrane transporter activity (GO:0005460);; Cellular Component: Golgi apparatus (GO:0005794);; Biological Process: UDP-glucose transport (GO:0015786);; Cellular Component: integral component of membrane (GO:0016021);; Biological Process: lateral root development (GO:0048527);;…	--	[GOU]	--	Triose-phosphate Transporter family;; UAA transporter family	Probable sugar phosphate/phosphate translocator At3g17430 GN=At3g17430 OS=Arabidopsis thaliana (Mouse-ear cress) PE=1 SV=1	PREDICTED: putative UDP-sugar transporter DDB_G0278631 [Beta vulgaris subsp. vulgaris]
c30312.graph_c0	--	--	Molecular Function: magnesium ion binding (GO:0000287);; Cellular Component: cytosol (GO:0005829);; Molecular Function: 5'-nucleotidase activity (GO:0008253);;	--	[S]	Function unknown	Pyrimidine 5'-nucleotidase (UMPH-1)	--	PREDICTED: 7-methylguanosine phosphate-specific 5&apos;-nucleotidase [Beta vulgaris subsp. vulgaris]
c40684.graph_c0	--	--	Biological Process: DNA recombination (GO:0006310);; Biological Process: cellular protein modification process (GO:0006464);; Biological Process: meiosis (GO:0007126);; Biological Process: multicellular organismal development (GO:0007275);; Biological Process: regulation of nucleobase-containing compound metabolic process (GO:0019219);; Biological Process: anatomical structure development (GO:004…	--	--	--	BRCA1 C Terminus (BRCT) domain	Nijmegen breakage syndrome 1 protein {ECO:0000303|PubMed:17182003} OS=Arabidopsis thaliana (Mouse-ear cress) PE=1 SV=1	PREDICTED: nijmegen breakage syndrome 1 protein [Beta vulgaris subsp. vulgaris]
c68438.graph_c0	--	--	--	--	--	--	--	--	PREDICTED: uncharacterized protein LOC104893521 [Beta vulgaris subsp. vulgaris]
c14367.graph_c0	--	--	--	--	[R]	General function prediction only	--	--	PREDICTED: uncharacterized protein LOC104902898 [Beta vulgaris subsp. vulgaris]
c42141.graph_c0	[G]	Carbohydrate transport and metabolism	Cellular Component: nucleus (GO:0005634);; Cellular Component: cytosol (GO:0005829);; Biological Process: systemic acquired resistance (GO:0009627);; Biological Process: response to endoplasmic reticulum stress (GO:0034976);;	--	[G]	Carbohydrate transport and metabolism	Histidine phosphatase superfamily (branch 1)	--	PREDICTED: uncharacterized protein LOC104905306 [Beta vulgaris subsp. vulgaris]
c22246.graph_c0	--	--	--	--	--	--	--	--	PREDICTED: probable nucleoredoxin 1 [Beta vulgaris subsp. vulgaris]
c41609.graph_c0	--	--	--	--	--	--	Pathogenesis-related protein Bet v I family	MLP-like protein 34 GN=MLP34 OS=Arabidopsis thaliana (Mouse-ear cress) PE=2 SV=1	PREDICTED: MLP-like protein 28 [Beta vulgaris subsp. vulgaris]
c19590.graph_c0	--	--	--	--	[V]	Defense mechanisms	--	Putative nuclear matrix constituent protein 1-like protein GN=At5g65770 OS=Arabidopsis thaliana (Mouse-ear cress) PE=2 SV=1	PREDICTED: golgin subfamily A member 4 [Beta vulgaris subsp. vulgaris]
c58550.graph_c0	--	--	--	K09287|1e-15|rcu:RCOM_0191490|DNA-binding protein RAV1, putative	--	--	AP2 domain	AP2/ERF and B3 domain-containing transcription factor At1g50680 GN=At1g50680 OS=Arabidopsis thaliana (Mouse-ear cress) PE=2 SV=1	PREDICTED: AP2/ERF and B3 domain-containing transcription factor At1g51120-like [Beta vulgaris subsp. vulgaris]
c39190.graph_c0	[RTKL]	--	--	--	--	--	Protein kinase domain;; Protein tyrosine kinase;; Leucine rich repeat;; Leucine Rich repeats (2 copies);; Leucine Rich Repeat;; Leucine rich repeat N-terminal domain	Probable receptor protein kinase TMK1 (Precursor) GN=TMK1 OS=Arabidopsis thaliana (Mouse-ear cress) PE=1 SV=1	PREDICTED: probable receptor protein kinase TMK1 [Beta vulgaris subsp. vulgaris]
c15865.graph_c0	--	--	Biological Process: ubiquitin-dependent protein catabolic process (GO:0006511);; Biological Process: regulation of biological process (GO:0050789);;	--	--	--	F-box domain;; F-box-like	Protein UNUSUAL FLORAL ORGANS GN=F17F8.16 OS=Arabidopsis thaliana (Mouse-ear cress) PE=1 SV=2	PREDICTED: protein UNUSUAL FLORAL ORGANS [Beta vulgaris subsp. vulgaris]
c38145.graph_c0	--	--	--	--	[R]	General function prediction only	Programmed cell death protein 2, C-terminal putative domain	--	PREDICTED: probable 20S rRNA accumulation protein 4 [Beta vulgaris subsp. vulgaris]
c19003.graph_c0	--	--	Cellular Component: endosome (GO:0005768);; Cellular Component: Golgi apparatus (GO:0005794);; Cellular Component: trans-Golgi network (GO:0005802);; Molecular Function: methyltransferase activity (GO:0008168);; Cellular Component: membrane (GO:0016020);; Biological Process: methylation (GO:0032259);;	--	--	--	Putative S-adenosyl-L-methionine-dependent methyltransferase;; Methyltransferase domain;; Methyltransferase domain	Probable methyltransferase PMT2 GN=At1g26850 OS=Arabidopsis thaliana (Mouse-ear cress) PE=2 SV=2	PREDICTED: probable methyltransferase PMT2 [Beta vulgaris subsp. vulgaris]
c37606.graph_c0	--	--	--	--	--	--	--	--	PREDICTED: uncharacterized protein LOC104893463 [Beta vulgaris subsp. vulgaris]
c10938.graph_c0	[I]	Lipid transport and metabolism	Biological Process: mitotic cell cycle (GO:0000278);; Biological Process: long-chain fatty acid metabolic process (GO:0001676);; Biological Process: defense response to insect (GO:0002213);; Molecular Function: long-chain fatty acid-CoA ligase activity (GO:0004467);; Cellular Component: peroxisome (GO:0005777);; Biological Process: RNA processing (GO:0006396);; Biological Process: fatty acid bios…	K01897|0.0|vvi:100244213|hypothetical protein LOC100244213	[I]	Lipid transport and metabolism	AMP-binding enzyme	Long chain acyl-CoA synthetase 7, peroxisomal GN=LACS7 OS=Arabidopsis thaliana (Mouse-ear cress) PE=1 SV=2	PREDICTED: long chain acyl-CoA synthetase 7, peroxisomal [Beta vulgaris subsp. vulgaris]
c79092.graph_c0	--	--	--	--	[R]	General function prediction only	--	Uncharacterized mitochondrial protein AtMg00810 GN=AtMg00810 OS=Arabidopsis thaliana (Mouse-ear cress) PE=4 SV=1	PREDICTED: uncharacterized protein LOC104888604 [Beta vulgaris subsp. vulgaris]
c35243.graph_c0	--	--	Biological Process: innate immune response (GO:0045087);; Biological Process: system development (GO:0048731);; Biological Process: response to other organism (GO:0051707);; Biological Process: cellular response to stimulus (GO:0051716);; Biological Process: response to oxygen-containing compound (GO:1901700);;	--	--	--	--	Protein CPR-5 GN=MXK3.16 OS=Arabidopsis thaliana (Mouse-ear cress) PE=1 SV=1	PREDICTED: protein CPR-5 [Beta vulgaris subsp. vulgaris]
c17752.graph_c0	--	--	--	K11159|8e-08|zma:542203|CCD	--	--	--	Carotenoid 9,10(9&apos;,10&apos;)-cleavage dioxygenase GN=CCD OS=Crocus sativus (Saffron) PE=1 SV=1	white cap1 [Zea mays]
c32921.graph_c0	--	--	--	--	[R]	General function prediction only	--	MATE efflux family protein 3, chloroplastic (Precursor) GN=DTX45 OS=Arabidopsis thaliana (Mouse-ear cress) PE=2 SV=2	PREDICTED: MATE efflux family protein 3, chloroplastic-like isoform X2 [Nicotiana tomentosiformis]
c42709.graph_c0	[R]	General function prediction only	--	--	[BK]	--	SAD/SRA domain;; SET domain;; Pre-SET motif	Histone-lysine N-methyltransferase, H3 lysine-9 specific SUVH4 GN=MAC12.7 OS=Arabidopsis thaliana (Mouse-ear cress) PE=1 SV=2	PREDICTED: histone-lysine N-methyltransferase, H3 lysine-9 specific SUVH4-like [Beta vulgaris subsp. vulgaris]
c56419.graph_c0	--	--	--	--	--	--	--	--	PREDICTED: uncharacterized protein LOC104901457 [Beta vulgaris subsp. vulgaris]
c14116.graph_c0	--	--	--	--	--	--	--	Calcium and calcium/calmodulin-dependent serine/threonine-protein kinase (Fragment) GN=SYM9 OS=Pisum sativum (Garden pea) PE=1 SV=2	PREDICTED: uncharacterized protein LOC104891188 isoform X2 [Beta vulgaris subsp. vulgaris]
c60853.graph_c0	--	--	--	--	--	--	--	--	PREDICTED: DNA damage-inducible protein 1-like [Beta vulgaris subsp. vulgaris]
c42493.graph_c0	--	--	--	--	--	--	--	Coiled-coil domain-containing protein SCD2 {ECO:0000305} OS=Arabidopsis thaliana (Mouse-ear cress) PE=1 SV=1	PREDICTED: uncharacterized protein LOC104897472 [Beta vulgaris subsp. vulgaris]
c73993.graph_c0	[G]	Carbohydrate transport and metabolism	Biological Process: carbohydrate metabolic process (GO:0005975);; Molecular Function: fructan beta-(2,6)-fructosidase activity (GO:0033949);;	K01193|7e-32|rcu:RCOM_0655770|Beta-fructofuranosidase, cell wall isozyme precursor, putative (EC:3.2.1.26)	[G]	Carbohydrate transport and metabolism	Glycosyl hydrolases family 32 N-terminal domain	Fructan 6-exohydrolase {ECO:0000312|EMBL:CAD48404.1} (Precursor) OS=Beta vulgaris (Sugar beet) PE=1 SV=1	PREDICTED: fructan 6-exohydrolase-like [Beta vulgaris subsp. vulgaris]
c12056.graph_c0	--	--	--	--	[I]	Lipid transport and metabolism	CRAL/TRIO domain	Phosphatidylinositol/phosphatidylcholine transfer protein SFH9 GN=SFH9 OS=Arabidopsis thaliana (Mouse-ear cress) PE=2 SV=1	PREDICTED: phosphatidylinositol/phosphatidylcholine transfer protein SFH9 isoform X2 [Beta vulgaris subsp. vulgaris]
c56080.graph_c0	--	--	--	--	--	--	--	--	PREDICTED: uncharacterized protein LOC100854795 [Vitis vinifera]
c55569.graph_c0	--	--	--	--	--	--	--	--	PREDICTED: uncharacterized protein LOC104904221 [Beta vulgaris subsp. vulgaris]
c11375.graph_c0	[G]	Carbohydrate transport and metabolism	Molecular Function: adenosine kinase activity (GO:0004001);; Molecular Function: copper ion binding (GO:0005507);; Cellular Component: plasma membrane (GO:0005886);; Biological Process: purine ribonucleoside salvage (GO:0006166);; Biological Process: AMP biosynthetic process (GO:0006167);; Cellular Component: chloroplast (GO:0009507);; Biological Process: phosphorylation (GO:0016310);; Molecular …	K00856|0.0|pop:POPTR_720292|adenosine kinase (EC:2.7.1.20)	[G]	Carbohydrate transport and metabolism	pfkB family carbohydrate kinase	Adenosine kinase 2 GN=ADK2 OS=Arabidopsis thaliana (Mouse-ear cress) PE=1 SV=1	PREDICTED: adenosine kinase 2-like [Beta vulgaris subsp. vulgaris]
c37828.graph_c0	--	--	--	--	[T]	Signal transduction mechanisms	Carbohydrate-binding protein of the ER;; Di-glucose binding within endoplasmic reticulum;; Protein tyrosine kinase;; Protein kinase domain	Probable receptor-like protein kinase At5g59700 (Precursor) GN=At5g59700 OS=Arabidopsis thaliana (Mouse-ear cress) PE=3 SV=1	PREDICTED: receptor-like protein kinase HERK 1 [Beta vulgaris subsp. vulgaris]
c20359.graph_c0	[R]	General function prediction only	--	--	--	--	Helix-loop-helix DNA-binding domain	Transcription factor bHLH130 GN=T24P15.19 OS=Arabidopsis thaliana (Mouse-ear cress) PE=1 SV=1	PREDICTED: transcription factor bHLH130 [Beta vulgaris subsp. vulgaris]
c33437.graph_c0	--	--	--	--	--	--	--	--	PREDICTED: neurofilament medium polypeptide [Beta vulgaris subsp. vulgaris]
c34464.graph_c0	--	--	--	--	--	--	Heavy-metal-associated domain	Extensin (Precursor) OS=Daucus carota (Wild carrot) PE=2 SV=1	PREDICTED: extensin-like isoform X1 [Beta vulgaris subsp. vulgaris]
c39998.graph_c0	[R]	General function prediction only	Cellular Component: chloroplast thylakoid membrane (GO:0009535);;	--	--	--	--	--	PREDICTED: uncharacterized protein LOC104908678 [Beta vulgaris subsp. vulgaris]
c10912.graph_c0	--	--	--	--	--	--	Protein of unknown function (DUF1685)	--	PREDICTED: uncharacterized protein LOC104900508 [Beta vulgaris subsp. vulgaris]
c25419.graph_c0	[RTKL]	--	--	--	--	--	Plant transposase (Ptta/En/Spm family)	--	PREDICTED: SAFB-like transcription modulator [Beta vulgaris subsp. vulgaris]
c27389.graph_c1	[E]	Amino acid transport and metabolism	Molecular Function: aspartate kinase activity (GO:0004072);; Molecular Function: homoserine dehydrogenase activity (GO:0004412);; Biological Process: aspartate family amino acid biosynthetic process (GO:0009067);; Cellular Component: chloroplast (GO:0009507);; Biological Process: phosphorylation (GO:0016310);; Molecular Function: amino acid binding (GO:0016597);; Molecular Function: NADP binding …	K12524|0.0|rcu:RCOM_0742100|aspartate kinase, putative (EC:2.7.2.4 1.1.1.3)	--	--	Amino acid kinase family;; ACT domain;; ACT domain;; Homoserine dehydrogenase, NAD binding domain	Homoserine dehydrogenase (Precursor) GN=T16H5.70 OS=Arabidopsis thaliana (Mouse-ear cress) PE=1 SV=1	PREDICTED: bifunctional aspartokinase/homoserine dehydrogenase 2, chloroplastic-like [Beta vulgaris subsp. vulgaris]
c34653.graph_c0	--	--	--	--	--	--	--	--	PREDICTED: putative protein TPRXL [Beta vulgaris subsp. vulgaris]
c31804.graph_c0	[RTKL]	--	Molecular Function: nucleotide binding (GO:0000166);; Molecular Function: protein kinase activity (GO:0004672);;	--	--	--	Protein kinase domain;; Protein tyrosine kinase	Cysteine-rich receptor-like protein kinase 6 (Precursor) OS=Arabidopsis thaliana (Mouse-ear cress) PE=1 SV=1	PREDICTED: cysteine-rich receptor-like protein kinase 10 [Beta vulgaris subsp. vulgaris]
c78903.graph_c0	--	--	--	--	[J]	Translation, ribosomal structure and biogenesis	--	--	--
c35979.graph_c0	[S]	Function unknown	Cellular Component: chloroplast (GO:0009507);;	--	--	--	Protein of unknown function (DUF1517)	--	PREDICTED: uncharacterized protein LOC104821125 [Tarenaya hassleriana]
c49698.graph_c0	--	--	--	--	--	--	Late embryogenesis abundant protein	Uncharacterized protein At1g08160 GN=At1g08160 OS=Arabidopsis thaliana (Mouse-ear cress) PE=2 SV=1	PREDICTED: uncharacterized protein At1g08160-like [Citrus sinensis]
c38478.graph_c0	--	--	--	--	--	--	Mis12 protein	--	PREDICTED: uncharacterized protein LOC104903411 [Beta vulgaris subsp. vulgaris]
c35667.graph_c1	--	--	Molecular Function: sequence-specific DNA binding transcription factor activity (GO:0003700);; Cellular Component: nucleus (GO:0005634);; Biological Process: regulation of transcription, DNA-templated (GO:0006355);; Biological Process: anthocyanin accumulation in tissues in response to UV light (GO:0043481);; Molecular Function: sequence-specific DNA binding (GO:0043565);; Biological Process: roo…	--	--	--	START domain;; Homeobox domain	Homeobox-leucine zipper protein ANTHOCYANINLESS 2 GN=ANL2 OS=Arabidopsis thaliana (Mouse-ear cress) PE=2 SV=1	PREDICTED: homeobox-leucine zipper protein ANTHOCYANINLESS 2 [Beta vulgaris subsp. vulgaris]
c13025.graph_c0	--	--	--	--	--	--	--	--	PREDICTED: uncharacterized protein LOC104890860 [Beta vulgaris subsp. vulgaris]
c34886.graph_c0	--	--	Molecular Function: N-acetyltransferase activity (GO:0008080);; Biological Process: metabolic process (GO:0008152);;	--	[T]	Signal transduction mechanisms	Protein of unknown function (DUF568);; DOMON domain;; Acetyltransferase (GNAT) domain;; Acetyltransferase (GNAT) family;; Acetyltransferase (GNAT) domain;; FR47-like protein	Cytochrome b561 and DOMON domain-containing protein At5g47530 (Precursor) GN=At5g47530 OS=Arabidopsis thaliana (Mouse-ear cress) PE=2 SV=1	PREDICTED: cytochrome b561 and DOMON domain-containing protein At5g47530 [Beta vulgaris subsp. vulgaris]
c32009.graph_c0	--	--	--	--	--	--	--	--	PREDICTED: uncharacterized protein LOC104888946 [Beta vulgaris subsp. vulgaris]
c79702.graph_c0	--	--	--	--	--	--	--	--	PREDICTED: transposon Tf2-1 polyprotein isoform X1 [Beta vulgaris subsp. vulgaris]
c30379.graph_c0	[IQR]	--	Molecular Function: nucleotide binding (GO:0000166);; Molecular Function: oxidoreductase activity (GO:0016491);; Biological Process: oxidation-reduction process (GO:0055114);;	--	[Q]	Secondary metabolites biosynthesis, transport and catabolism	short chain dehydrogenase	Short-chain dehydrogenase TIC 32, chloroplastic GN=TIC32 OS=Pisum sativum (Garden pea) PE=1 SV=1	Dehydrogenase/reductase SDR family member 12 [Morus notabilis]
c43905.graph_c0	--	--	--	--	--	--	--	--	PREDICTED: cyclin-D5-1-like [Beta vulgaris subsp. vulgaris]
c25978.graph_c0	[M]	Cell wall/membrane/envelope biogenesis	--	--	--	--	Glycosyltransferase family 92;; Glycosyl transferase family 2;; Protein of unknown function (DUF2930)	UPF0392 protein At1g27200 GN=At1g27200 OS=Arabidopsis thaliana (Mouse-ear cress) PE=2 SV=2	PREDICTED: UPF0392 protein At1g27200 [Beta vulgaris subsp. vulgaris]
c34278.graph_c0	[G]	Carbohydrate transport and metabolism	Biological Process: L-arabinose metabolic process (GO:0046373);; Molecular Function: alpha-N-arabinofuranosidase activity (GO:0046556);;	--	--	--	Alpha-L-arabinofuranosidase C-terminus;; Carbohydrate binding domain	Alpha-L-arabinofuranosidase 1 (Precursor) GN=T7M13.18 OS=Arabidopsis thaliana (Mouse-ear cress) PE=1 SV=1	PREDICTED: alpha-L-arabinofuranosidase 1-like [Beta vulgaris subsp. vulgaris]
c28073.graph_c0	--	--	Biological Process: embryo development ending in seed dormancy (GO:0009793);;	--	--	--	--	--	PREDICTED: uncharacterized protein LOC104898285 [Beta vulgaris subsp. vulgaris]
c21637.graph_c0	[S]	Function unknown	--	--	[T]	Signal transduction mechanisms	Leucine Rich repeats (2 copies);; Leucine rich repeat	Putative disease resistance protein RGA3 GN=RGA3 OS=Solanum bulbocastanum (Wild potato) PE=2 SV=2	PREDICTED: putative disease resistance protein RGA3 [Beta vulgaris subsp. vulgaris]
c11916.graph_c0	[O]	Posttranslational modification, protein turnover, chaperones	--	--	[O]	Posttranslational modification, protein turnover, chaperones	Cyclophilin type peptidyl-prolyl cis-trans isomerase/CLD	Peptidyl-prolyl cis-trans isomerase CYP21-1 (Precursor) GN=CYP21-1 OS=Arabidopsis thaliana (Mouse-ear cress) PE=2 SV=1	PREDICTED: peptidyl-prolyl cis-trans isomerase CYP21-1 [Beta vulgaris subsp. vulgaris]
c31886.graph_c0	--	--	--	--	--	--	Plant phosphoribosyltransferase C-terminal;; C2 domain	C2 and GRAM domain-containing protein At1g03370 GN=At1g03370 OS=Arabidopsis thaliana (Mouse-ear cress) PE=2 SV=4	PREDICTED: multiple C2 and transmembrane domain-containing protein 1-like [Beta vulgaris subsp. vulgaris]
c31791.graph_c0	[Q]	Secondary metabolites biosynthesis, transport and catabolism	Molecular Function: oxidoreductase activity (GO:0016491);; Molecular Function: metal ion binding (GO:0046872);;	--	[Q]	Secondary metabolites biosynthesis, transport and catabolism	Cytochrome P450	Cytochrome P450 71A14 GN=CYP71A14 OS=Arabidopsis thaliana (Mouse-ear cress) PE=2 SV=1	PREDICTED: cytochrome P450 71A8-like [Beta vulgaris subsp. vulgaris]
c31420.graph_c0	--	--	Cellular Component: nucleus (GO:0005634);; Biological Process: regulation of transcription, DNA-templated (GO:0006355);; Molecular Function: zinc ion binding (GO:0008270);; Molecular Function: methylated histone residue binding (GO:0035064);;	--	[R]	General function prediction only	Domain of unknown function (DUF3594);; PHD-finger	PHD finger protein ALFIN-LIKE 9 GN=OsI_26819 OS=Oryza sativa subsp. indica (Rice) PE=3 SV=1	hypothetical protein EUGRSUZ_C032521, partial [Eucalyptus grandis]
c64286.graph_c0	--	--	--	--	--	--	--	--	PREDICTED: uncharacterized protein LOC104898613 [Beta vulgaris subsp. vulgaris]
c25883.graph_c0	--	--	Molecular Function: GTPase activity (GO:0003924);; Molecular Function: GTP binding (GO:0005525);; Cellular Component: endosome (GO:0005768);; Cellular Component: Golgi apparatus (GO:0005794);; Cellular Component: trans-Golgi network (GO:0005802);; Biological Process: GTP catabolic process (GO:0006184);; Biological Process: immune response (GO:0006955);;	--	[R]	General function prediction only	Guanylate-binding protein, N-terminal domain;; Guanylate-binding protein, C-terminal domain	--	PREDICTED: guanylate-binding protein 4 [Beta vulgaris subsp. vulgaris]
c35941.graph_c0	--	--	--	--	--	--	F-box domain;; F-box-like;; FBD	F-box/LRR-repeat protein At3g59200 GN=At3g59200 OS=Arabidopsis thaliana (Mouse-ear cress) PE=2 SV=1	PREDICTED: F-box/LRR-repeat protein At4g14103-like isoform X1 [Beta vulgaris subsp. vulgaris]
c41617.graph_c0	[O]	Posttranslational modification, protein turnover, chaperones	Cellular Component: vacuolar membrane (GO:0005774);; Cellular Component: plasma membrane (GO:0005886);; Cellular Component: plasmodesma (GO:0009506);; Cellular Component: chloroplast (GO:0009507);; Molecular Function: protein histidine kinase binding (GO:0043424);;	--	[C]	Energy production and conversion	SPFH domain / Band 7 family	Hypersensitive-induced response protein 2 GN=HIR2 OS=Arabidopsis thaliana (Mouse-ear cress) PE=1 SV=1	PREDICTED: hypersensitive-induced response protein 2 [Beta vulgaris subsp. vulgaris]
c22372.graph_c0	[L]	Replication, recombination and repair	Molecular Function: RNA binding (GO:0003723);; Molecular Function: RNA-directed DNA polymerase activity (GO:0003964);; Molecular Function: aspartic-type endopeptidase activity (GO:0004190);; Cellular Component: nucleus (GO:0005634);; Biological Process: RNA-dependent DNA replication (GO:0006278);; Biological Process: proteolysis (GO:0006508);; Biological Process: DNA integration (GO:0015074);;	--	[R]	General function prediction only	Reverse transcriptase (RNA-dependent DNA polymerase)	Uncharacterized mitochondrial protein AtMg00860 GN=AtMg00860 OS=Arabidopsis thaliana (Mouse-ear cress) PE=4 SV=1	hypothetical protein AALP_AA1G155400 [Arabis alpina]
c45579.graph_c0	--	--	--	--	--	--	--	--	uncharacterized protein LOC100191150 precursor [Zea mays]
c39697.graph_c0	--	--	--	K13144|0.0|rcu:RCOM_0122800|hypothetical protein	[S]	Function unknown	--	--	PREDICTED: uncharacterized protein LOC104908123 isoform X2 [Beta vulgaris subsp. vulgaris]
c38805.graph_c0	--	--	Biological Process: malate transport (GO:0015743);;	--	[R]	General function prediction only	Aluminium activated malate transporter;; Fusaric acid resistance protein-like	Aluminum-activated malate transporter 9 GN=ALMT9 OS=Arabidopsis thaliana (Mouse-ear cress) PE=2 SV=1	PREDICTED: aluminum-activated malate transporter 9 [Beta vulgaris subsp. vulgaris]
c40022.graph_c0	--	--	--	--	[L]	Replication, recombination and repair	BED zinc finger;; hAT family C-terminal dimerisation region	Putative AC transposase OS=Zea mays (Maize) PE=2 SV=2	hypothetical protein PRUPE_ppa026473mg [Prunus persica]
c32845.graph_c0	[RTKL]	--	Biological Process: MAPK cascade (GO:0000165);; Molecular Function: nucleotide binding (GO:0000166);; Molecular Function: protein serine/threonine kinase activity (GO:0004674);; Biological Process: protein phosphorylation (GO:0006468);; Biological Process: response to osmotic stress (GO:0006970);;	K13414|0.0|pop:POPTR_1078383|hypothetical protein	[T]	Signal transduction mechanisms	Protein kinase domain;; Protein tyrosine kinase;; Kinase-like	Mitogen-activated protein kinase kinase kinase 1 GN=MEKK1 OS=Arabidopsis thaliana (Mouse-ear cress) PE=1 SV=2	PREDICTED: mitogen-activated protein kinase kinase kinase 1-like [Beta vulgaris subsp. vulgaris]
c34804.graph_c0	--	--	Biological Process: intracellular protein transport (GO:0006886);; Biological Process: vesicle-mediated transport (GO:0016192);; Cellular Component: clathrin adaptor complex (GO:0030131);;	K12393|0.0|rcu:RCOM_1509430|clathrin coat assembly protein ap-1, putative	[U]	Intracellular trafficking, secretion, and vesicular transport	Adaptor complexes medium subunit family;; Clathrin adaptor complex small chain	AP-1 complex subunit mu-2 GN=F8A5.29 OS=Arabidopsis thaliana (Mouse-ear cress) PE=1 SV=1	PREDICTED: AP-1 complex subunit mu-2 [Beta vulgaris subsp. vulgaris]
c77164.graph_c0	--	--	--	--	--	--	--	Putative wall-associated receptor kinase-like 11 (Precursor) GN=WAKL11 OS=Arabidopsis thaliana (Mouse-ear cress) PE=3 SV=2	PREDICTED: wall-associated receptor kinase 5-like [Beta vulgaris subsp. vulgaris]
c35570.graph_c0	--	--	Molecular Function: 1-phosphatidylinositol binding (GO:0005545);; Cellular Component: nucleus (GO:0005634);; Cellular Component: cytosol (GO:0005829);; Cellular Component: plasma membrane (GO:0005886);; Cellular Component: clathrin coat (GO:0030118);; Molecular Function: clathrin binding (GO:0030276);; Biological Process: clathrin coat assembly (GO:0048268);;	--	[TU]	--	ANTH domain;; ENTH domain	Probable clathrin assembly protein At4g32285 GN=At4g32285 OS=Arabidopsis thaliana (Mouse-ear cress) PE=1 SV=2	PREDICTED: probable clathrin assembly protein At4g32285 [Beta vulgaris subsp. vulgaris]
c34491.graph_c0	--	--	--	K03936|7e-07|vvi:100244398|similar to nad9	[C]	Energy production and conversion	--	NADH dehydrogenase [ubiquinone] iron-sulfur protein 3 GN=NAD9 OS=Patellifolia webbiana (Patellaria webbiana) PE=2 SV=2	orf224 (mitochondrion) [Eruca vesicaria subsp. sativa]
c41590.graph_c0	--	--	Molecular Function: nucleic acid binding (GO:0003676);; Biological Process: cellular process (GO:0009987);; Cellular Component: intracellular part (GO:0044424);;	--	[R]	General function prediction only	La domain;; RNA recognition motif. (a.k.a. RRM, RBD, or RNP domain)	La-related protein 6A GN=LARP6A OS=Arabidopsis thaliana (Mouse-ear cress) PE=2 SV=1	PREDICTED: la-related protein 6A [Beta vulgaris subsp. vulgaris]
c36704.graph_c0	--	--	--	K12604|0.0|rcu:RCOM_1609680|ccr4-not transcription complex, putative	[K]	Transcription	CCR4-Not complex component, Not1;; Domain of unknown function (DUF3819)	--	PREDICTED: CCR4-NOT transcription complex subunit 1 isoform X3 [Beta vulgaris subsp. vulgaris]
c34117.graph_c0	[J]	Translation, ribosomal structure and biogenesis	Molecular Function: translation initiation factor activity (GO:0003743);; Molecular Function: GTPase activity (GO:0003924);; Molecular Function: GTP binding (GO:0005525);; Biological Process: GTP catabolic process (GO:0006184);; Biological Process: translational initiation (GO:0006413);;	K03242|1e-38|rcu:RCOM_0727700|eukaryotic translation initiation factor 2 gamma subunit, putative	[J]	Translation, ribosomal structure and biogenesis	Initiation factor eIF2 gamma, C terminal	--	eukaryotic translation initiation factor 2 gamma subunit, putative [Ricinus communis]
c77271.graph_c0	--	--	--	--	--	--	Protein of unknown function (DUF3296)	--	--
c43471.graph_c0	--	--	--	--	--	--	Dirigent-like protein	Dirigent protein 19 (Precursor) GN=DIR19 OS=Arabidopsis thaliana (Mouse-ear cress) PE=2 SV=1	PREDICTED: dirigent protein 22-like [Beta vulgaris subsp. vulgaris]
c23347.graph_c0	--	--	Biological Process: cellular process (GO:0009987);;	--	--	--	--	--	PREDICTED: ethylene-responsive transcription factor ERF073-like [Beta vulgaris subsp. vulgaris]
c40251.graph_c0	[L]	Replication, recombination and repair	Molecular Function: RNA binding (GO:0003723);; Molecular Function: RNA-directed DNA polymerase activity (GO:0003964);; Biological Process: RNA-dependent DNA replication (GO:0006278);; Molecular Function: zinc ion binding (GO:0008270);; Biological Process: DNA integration (GO:0015074);;	--	[R]	General function prediction only	Reverse transcriptase (RNA-dependent DNA polymerase);; Integrase core domain	Uncharacterized mitochondrial protein AtMg00860 GN=AtMg00860 OS=Arabidopsis thaliana (Mouse-ear cress) PE=4 SV=1	hypothetical protein VITISV_020252 [Vitis vinifera]
c17568.graph_c0	--	--	--	--	--	--	--	--	hypothetical protein L484_006173 [Morus notabilis]
c63524.graph_c0	--	--	--	K09422|1e-43|pop:POPTR_562588|MYB032	[K]	Transcription	--	Transcription factor MYB39 GN=dl4925c OS=Arabidopsis thaliana (Mouse-ear cress) PE=2 SV=1	PREDICTED: transcription factor MYB39-like [Beta vulgaris subsp. vulgaris]
c51692.graph_c0	--	--	--	K02928|1e-10|osa:4342366|Os07g0139600	[J]	Translation, ribosomal structure and biogenesis	--	60S ribosomal protein L41 GN=RPL41 OS=Nicotiana tabacum (Common tobacco) PE=3 SV=1	Os07g0139600 [Oryza sativa Japonica Group]
c45175.graph_c0	--	--	Molecular Function: ATP binding (GO:0005524);; Biological Process: transport (GO:0006810);; Cellular Component: integral component of membrane (GO:0016021);;	--	--	--	Ureide permease	Probable ureide permease A3 (Fragment) GN=A3 OS=Vigna unguiculata (Cowpea) PE=2 SV=2	PREDICTED: ureide permease 2-like [Beta vulgaris subsp. vulgaris]
c20354.graph_c0	--	--	--	--	--	--	GRAS domain family	Scarecrow-like protein 32 GN=SCL32 OS=Arabidopsis thaliana (Mouse-ear cress) PE=2 SV=1	PREDICTED: scarecrow-like protein 32 [Beta vulgaris subsp. vulgaris]
c35178.graph_c0	--	--	--	--	[R]	General function prediction only	--	Uncharacterized mitochondrial protein AtMg00750 GN=AtMg00750 OS=Arabidopsis thaliana (Mouse-ear cress) PE=4 SV=1	PREDICTED: uncharacterized protein LOC104894399 [Beta vulgaris subsp. vulgaris]
c41870.graph_c0	--	--	--	--	--	--	Phytosulfokine precursor protein (PSK)	Phytosulfokine-beta (Precursor) GN=T32N15.2 OS=Arabidopsis thaliana (Mouse-ear cress) PE=2 SV=2	PREDICTED: putative phytosulfokines 6 isoform X1 [Vitis vinifera]
c37208.graph_c0	--	--	--	--	--	--	--	Proline-rich receptor-like protein kinase PERK2 GN=PERK2 OS=Arabidopsis thaliana (Mouse-ear cress) PE=2 SV=3	PREDICTED: uncharacterized protein LOC104902347 [Beta vulgaris subsp. vulgaris]
c39014.graph_c0	[Z]	Cytoskeleton	Molecular Function: microtubule motor activity (GO:0003777);; Molecular Function: ATP binding (GO:0005524);; Cellular Component: kinesin complex (GO:0005871);; Cellular Component: microtubule (GO:0005874);; Biological Process: microtubule-based movement (GO:0007018);; Molecular Function: microtubule binding (GO:0008017);;	K10405|0.0|vvi:100248639|hypothetical protein LOC100248639	[Z]	Cytoskeleton	Kinesin motor domain;; Oxygen evolving enhancer protein 3 (PsbQ)	Kinesin-3 OS=Arabidopsis thaliana (Mouse-ear cress) PE=2 SV=1	PREDICTED: kinesin-3 isoform X1 [Beta vulgaris subsp. vulgaris]
c31828.graph_c0	--	--	--	--	[AR]	--	KH domain;; KH domain;; KH domain;; KH domain	KH domain-containing protein At4g18375 GN=At4g18375 OS=Arabidopsis thaliana (Mouse-ear cress) PE=2 SV=1	PREDICTED: KH domain-containing protein At4g18375 [Beta vulgaris subsp. vulgaris]
c25805.graph_c0	--	--	Molecular Function: transaminase activity (GO:0008483);; Molecular Function: 1-aminocyclopropane-1-carboxylate synthase activity (GO:0016847);; Molecular Function: pyridoxal phosphate binding (GO:0030170);; Biological Process: 1-aminocyclopropane-1-carboxylate biosynthetic process (GO:0042218);;	K14270|4e-19|rcu:RCOM_1498780|acc synthase, putative (EC:4.4.1.14)	[T]	Signal transduction mechanisms	--	Probable aminotransferase ACS10 GN=ACS10 OS=Arabidopsis thaliana (Mouse-ear cress) PE=1 SV=1	PREDICTED: probable aminotransferase ACS12 [Beta vulgaris subsp. vulgaris]
c8290.graph_c0	--	--	Molecular Function: nucleic acid binding (GO:0003676);;	--	[R]	General function prediction only	--	--	PREDICTED: uncharacterized protein LOC104884717 [Beta vulgaris subsp. vulgaris]
c41754.graph_c0	--	--	Cellular Component: endoplasmic reticulum (GO:0005783);; Cellular Component: integral component of membrane (GO:0016021);;	--	[T]	Signal transduction mechanisms	Organic solute transporter Ostalpha	--	PREDICTED: transmembrane protein 184C [Beta vulgaris subsp. vulgaris]
c43282.graph_c0	--	--	--	--	--	--	--	--	PREDICTED: small G protein signaling modulator 1 isoform X6 [Beta vulgaris subsp. vulgaris]
c10767.graph_c0	--	--	Molecular Function: Rho GDP-dissociation inhibitor activity (GO:0005094);; Cellular Component: cytoplasm (GO:0005737);;	--	[T]	Signal transduction mechanisms	RHO protein GDP dissociation inhibitor	Rho GDP-dissociation inhibitor 1 GN=GDI1 OS=Arabidopsis thaliana (Mouse-ear cress) PE=1 SV=1	PREDICTED: rho GDP-dissociation inhibitor 1-like [Beta vulgaris subsp. vulgaris]
c54968.graph_c0	--	--	--	--	[R]	General function prediction only	Reverse transcriptase (RNA-dependent DNA polymerase)	--	hypothetical protein [Beta vulgaris subsp. vulgaris]
c25534.graph_c0	--	--	--	--	[R]	General function prediction only	--	Uncharacterized mitochondrial protein AtMg00760 GN=AtMg00760 OS=Arabidopsis thaliana (Mouse-ear cress) PE=4 SV=1	PREDICTED: uncharacterized protein LOC104899241 [Beta vulgaris subsp. vulgaris]
c80038.graph_c0	[L]	Replication, recombination and repair	Molecular Function: DNA binding (GO:0003677);; Molecular Function: DNA-(apurinic or apyrimidinic site) lyase activity (GO:0003906);; Molecular Function: endonuclease activity (GO:0004519);; Biological Process: base-excision repair (GO:0006284);; Molecular Function: 4 iron, 4 sulfur cluster binding (GO:0051539);;	K10773|8e-14|ota:Ot14g01120|putative endonuclease (ISS)	[L]	Replication, recombination and repair	Helix-hairpin-helix motif	Endonuclease III homolog 2, chloroplastic {ECO:0000255|HAMAP-Rule:MF_03183} (Precursor) GN=NTH2 OS=Arabidopsis thaliana (Mouse-ear cress) PE=2 SV=1	predicted protein [Physcomitrella patens]
c29670.graph_c1	--	--	--	--	--	--	PB1 domain	Ethylene-responsive transcription factor ABI4 GN=OSJNBa0077J17.14 OS=Oryza sativa subsp. japonica (Rice) PE=3 SV=1	PREDICTED: putative uncharacterized protein DDB_G0284695 [Beta vulgaris subsp. vulgaris]
c60635.graph_c0	--	--	--	--	[Q]	Secondary metabolites biosynthesis, transport and catabolism	--	Cytochrome P450 76C3 GN=CYP76C3 OS=Arabidopsis thaliana (Mouse-ear cress) PE=2 SV=2	PREDICTED: geraniol 8-hydroxylase-like [Beta vulgaris subsp. vulgaris]
c31165.graph_c0	[S]	Function unknown	--	--	--	--	Leucine Rich repeats (2 copies);; Leucine Rich Repeat;; Leucine rich repeat;; Leucine rich repeat	Disease resistance RPP13-like protein 4 GN=RPP13L4 OS=Arabidopsis thaliana (Mouse-ear cress) PE=2 SV=2	PREDICTED: disease resistance RPP13-like protein 4 [Phoenix dactylifera]
c23978.graph_c0	[M]	Cell wall/membrane/envelope biogenesis	--	--	--	--	Membrane bound O-acyl transferase family;; MBOAT, membrane-bound O-acyltransferase family	Acyl-CoA--sterol O-acyltransferase 1 GN=ASAT1 OS=Arabidopsis thaliana (Mouse-ear cress) PE=1 SV=1	PREDICTED: acyl-CoA--sterol O-acyltransferase 1 [Beta vulgaris subsp. vulgaris]
c77036.graph_c0	[M]	Cell wall/membrane/envelope biogenesis	--	--	--	--	--	--	predicted protein [Chlamydomonas reinhardtii]
c57200.graph_c0	[O]	Posttranslational modification, protein turnover, chaperones	Molecular Function: ATP binding (GO:0005524);; Cellular Component: extracellular region (GO:0005576);; Cellular Component: cytosol (GO:0005829);; Cellular Component: plasma membrane (GO:0005886);; Biological Process: translation (GO:0006412);; Biological Process: response to toxic substance (GO:0009636);; Cellular Component: cell surface (GO:0009986);; Biological Process: entry into host cell (GO…	--	[O]	Posttranslational modification, protein turnover, chaperones	Hsp70 protein;; NAD-specific glutamate dehydrogenase	Heat shock 70 kDa protein GN=HSP70 OS=Achlya klebsiana PE=2 SV=1	heat shock protein 70 [Pneumocystis murina]
c41012.graph_c0	[Q]	Secondary metabolites biosynthesis, transport and catabolism	Molecular Function: iron ion binding (GO:0005506);; Cellular Component: endoplasmic reticulum (GO:0005783);; Cellular Component: plasma membrane (GO:0005886);; Molecular Function: electron carrier activity (GO:0009055);; Biological Process: response to light stimulus (GO:0009416);; Cellular Component: plant-type cell wall (GO:0009505);; Biological Process: pollen development (GO:0009555);; Biolog…	K00487|0.0|pop:POPTR_739008|CYP73A43, C4H1	[Q]	Secondary metabolites biosynthesis, transport and catabolism	Cytochrome P450	Trans-cinnamate 4-monooxygenase GN=CYP73A1 OS=Helianthus tuberosus (Jerusalem artichoke) PE=1 SV=1	PREDICTED: trans-cinnamate 4-monooxygenase [Beta vulgaris subsp. vulgaris]
c57808.graph_c0	[O]	Posttranslational modification, protein turnover, chaperones	Molecular Function: ATP binding (GO:0005524);; Biological Process: response to stress (GO:0006950);; Molecular Function: 2-alkenal reductase [NAD(P)] activity (GO:0032440);; Biological Process: oxidation-reduction process (GO:0055114);;	K03283|1e-33|rcu:RCOM_0464250|heat shock protein, putative (EC:1.3.1.74)	[O]	Posttranslational modification, protein turnover, chaperones	Hsp70 protein	Heat shock cognate 70 kDa protein 1 GN=HSC-I OS=Solanum lycopersicum (Tomato) PE=2 SV=1	PREDICTED: heat shock 70 kDa protein 18-like [Beta vulgaris subsp. vulgaris]
c21284.graph_c0	--	--	--	--	--	--	Cotton fibre expressed protein;; Domain of unknown function (DUF4408)	--	PREDICTED: uncharacterized protein LOC104909111 [Beta vulgaris subsp. vulgaris]
c43146.graph_c0	--	--	--	--	[KR]	--	mTERF	--	PREDICTED: uncharacterized protein LOC104904276 [Beta vulgaris subsp. vulgaris]
c19538.graph_c0	--	--	Molecular Function: metal ion binding (GO:0046872);;	K10695|1e-142|vvi:100267448|hypothetical protein LOC100267448	[O]	Posttranslational modification, protein turnover, chaperones	Zinc finger, C3HC4 type (RING finger)	Putative E3 ubiquitin-protein ligase RING1a GN=K9L2.3 OS=Arabidopsis thaliana (Mouse-ear cress) PE=1 SV=2	PREDICTED: putative E3 ubiquitin-protein ligase RING1a [Beta vulgaris subsp. vulgaris]
c29116.graph_c0	[G]	Carbohydrate transport and metabolism	Biological Process: biosynthetic process (GO:0009058);; Molecular Function: lyase activity (GO:0016829);; Cellular Component: cell periphery (GO:0071944);;	--	[R]	General function prediction only	Strictosidine synthase;; SMP-30/Gluconolaconase/LRE-like region	Protein STRICTOSIDINE SYNTHASE-LIKE 10 {ECO:0000303|PubMed:10777701} (Precursor) OS=Arabidopsis thaliana (Mouse-ear cress) PE=2 SV=1	PREDICTED: strictosidine synthase 1-like [Beta vulgaris subsp. vulgaris]
c41570.graph_c0	--	--	Biological Process: phosphatidylinositol biosynthetic process (GO:0006661);; Cellular Component: integral component of membrane (GO:0016021);;	--	[S]	Function unknown	Uncharacterised protein family (UPF0220)	--	PREDICTED: transmembrane protein 50 homolog isoform X1 [Beta vulgaris subsp. vulgaris]
c41239.graph_c0	[O]	Posttranslational modification, protein turnover, chaperones	Biological Process: protein peptidyl-prolyl isomerization (GO:0000413);; Molecular Function: peptidyl-prolyl cis-trans isomerase activity (GO:0003755);; Biological Process: protein folding (GO:0006457);; Cellular Component: chloroplast thylakoid membrane (GO:0009535);; Cellular Component: chloroplast thylakoid lumen (GO:0009543);;	--	[O]	Posttranslational modification, protein turnover, chaperones	FKBP-type peptidyl-prolyl cis-trans isomerase	Peptidyl-prolyl cis-trans isomerase FKBP16-2, chloroplastic (Precursor) GN=At4g39710 OS=Arabidopsis thaliana (Mouse-ear cress) PE=1 SV=1	PREDICTED: peptidyl-prolyl cis-trans isomerase FKBP16-2, chloroplastic [Beta vulgaris subsp. vulgaris]
c52249.graph_c0	[K]	Transcription	--	--	[K]	Transcription	NLI interacting factor-like phosphatase	RNA polymerase II C-terminal domain phosphatase-like 4 GN=CPL4 OS=Arabidopsis thaliana (Mouse-ear cress) PE=1 SV=1	PREDICTED: RNA polymerase II C-terminal domain phosphatase-like 4 [Beta vulgaris subsp. vulgaris]
c38920.graph_c0	[Q]	Secondary metabolites biosynthesis, transport and catabolism	Molecular Function: monooxygenase activity (GO:0004497);; Molecular Function: binding (GO:0005488);; Molecular Function: oxidoreductase activity, acting on paired donors, with incorporation or reduction of molecular oxygen (GO:0016705);;	--	[Q]	Secondary metabolites biosynthesis, transport and catabolism	Cytochrome P450	Cytochrome P450 71A4 GN=CYP71A4 OS=Solanum melongena (Eggplant) PE=2 SV=1	PREDICTED: cytochrome P450 71A24-like [Beta vulgaris subsp. vulgaris]
c5621.graph_c0	--	--	--	--	[S]	Function unknown	--	--	hypothetical protein JCGZ_12673 [Jatropha curcas]
c33457.graph_c0	--	--	--	--	--	--	Protein of unknown function (DUF724);; Agenet domain;; Agenet domain	--	PREDICTED: uncharacterized protein LOC104894831 isoform X2 [Beta vulgaris subsp. vulgaris]
c30737.graph_c0	[V]	Defense mechanisms	Molecular Function: nucleic acid binding (GO:0003676);; Molecular Function: endonuclease activity (GO:0004519);; Biological Process: response to desiccation (GO:0009269);; Biological Process: response to cold (GO:0009409);; Biological Process: response to salt stress (GO:0009651);; Biological Process: response to abscisic acid (GO:0009737);;	--	--	--	HNH endonuclease;; HNH endonuclease	--	PREDICTED: uncharacterized protein LOC104888727 [Beta vulgaris subsp. vulgaris]
c41002.graph_c0	--	--	Molecular Function: ACP phosphopantetheine attachment site binding involved in fatty acid biosynthetic process (GO:0000036);; Molecular Function: oleoyl-[acyl-carrier-protein] hydrolase activity (GO:0004320);; Biological Process: fatty acid biosynthetic process (GO:0006633);; Cellular Component: plastid (GO:0009536);; Molecular Function: myristoyl-[acyl-carrier-protein] hydrolase activity (GO:001…	K10781|0.0|vvi:100257579|hypothetical protein LOC100257579	--	--	Acyl-ACP thioesterase;; Acyl-ATP thioesterase	Palmitoyl-acyl carrier protein thioesterase, chloroplastic (Precursor) GN=T27G7.19 OS=Arabidopsis thaliana (Mouse-ear cress) PE=1 SV=1	PREDICTED: palmitoyl-acyl carrier protein thioesterase, chloroplastic [Beta vulgaris subsp. vulgaris]
c72453.graph_c0	--	--	--	--	--	--	--	Alpha/beta-gliadin A-V (Precursor) OS=Triticum aestivum (Wheat) PE=2 SV=1	hypothetical protein VOLCADRAFT_58884 [Volvox carteri f. nagariensis]
c73881.graph_c0	[M]	Cell wall/membrane/envelope biogenesis	Molecular Function: oxidoreductase activity, acting on the CH-OH group of donors, NAD or NADP as acceptor (GO:0016616);;	--	--	--	UDP-glucose/GDP-mannose dehydrogenase family, NAD binding domain	Proline-rich receptor-like protein kinase PERK2 GN=PERK2 OS=Arabidopsis thaliana (Mouse-ear cress) PE=2 SV=3	unnamed protein product [Blastocystis hominis]
c4814.graph_c0	--	--	--	--	--	--	--	--	PREDICTED: F-box protein CPR30-like [Beta vulgaris subsp. vulgaris]
c77290.graph_c0	--	--	--	--	--	--	--	--	PREDICTED: putative WEB family protein At1g65010, chloroplastic isoform X3 [Beta vulgaris subsp. vulgaris]
c34612.graph_c0	--	--	--	--	--	--	--	--	PREDICTED: uncharacterized protein LOC104902807 [Beta vulgaris subsp. vulgaris]
c18851.graph_c0	[C]	Energy production and conversion	Molecular Function: glycerol-3-phosphate dehydrogenase [NAD+] activity (GO:0004367);; Biological Process: carbohydrate metabolic process (GO:0005975);; Cellular Component: glycerol-3-phosphate dehydrogenase complex (GO:0009331);; Molecular Function: protein homodimerization activity (GO:0042803);; Biological Process: glycerol-3-phosphate catabolic process (GO:0046168);; Molecular Function: NAD bi…	K00006|2e-58|cme:CMD113C|glycerol-3-phosphate dehydrogenase	[C]	Energy production and conversion	NAD-dependent glycerol-3-phosphate dehydrogenase C-terminus	Glycerol-3-phosphate dehydrogenase [NAD(+)] GN=GPDH OS=Cuphea lanceolata (Cigar flower) PE=2 SV=1	glycerol-3-phosphate dehydrogenase [NAD+] [Mucor circinelloides f. circinelloides 1006PhL]
c41322.graph_c0	--	--	Molecular Function: GTPase activity (GO:0003924);; Molecular Function: structural constituent of cytoskeleton (GO:0005200);; Molecular Function: GTP binding (GO:0005525);; Cellular Component: cytoplasm (GO:0005737);; Cellular Component: microtubule (GO:0005874);; Biological Process: GTP catabolic process (GO:0006184);; Biological Process: microtubule-based process (GO:0007017);; Biological Proces…	K07374|5e-74|rcu:RCOM_0855220|tubulin alpha chain, putative	[Z]	Cytoskeleton	Tubulin/FtsZ family, GTPase domain	Tubulin alpha-1 chain GN=TUBA1 OS=Anemia phyllitidis (Fern) PE=2 SV=1	putative tubulin alpha-1 chain [Fagus sylvatica]
c61593.graph_c0	--	--	--	--	--	--	Arabidopsis protein of unknown function	--	PREDICTED: uncharacterized protein LOC104884909 [Beta vulgaris subsp. vulgaris]
c74634.graph_c0	--	--	--	--	--	--	--	--	hypothetical protein V499_04857 [Pseudogymnoascus pannorum VKM F-103]
c42.graph_c0	--	--	Molecular Function: O-methyltransferase activity (GO:0008171);; Biological Process: methylation (GO:0032259);; Molecular Function: protein dimerization activity (GO:0046983);;	--	[R]	General function prediction only	O-methyltransferase	Caffeic acid 3-O-methyltransferase OS=Zinnia violacea (Garden zinnia) PE=2 SV=1	PREDICTED: caffeic acid 3-O-methyltransferase-like [Beta vulgaris subsp. vulgaris]
c28968.graph_c0	[S]	Function unknown	Molecular Function: protein kinase activity (GO:0004672);; Biological Process: metabolic process (GO:0008152);; Biological Process: cellular process (GO:0009987);; Cellular Component: membrane (GO:0016020);;	--	--	--	Leucine Rich Repeat;; Leucine Rich repeats (2 copies);; Leucine rich repeat;; Leucine rich repeat N-terminal domain;; Leucine Rich repeat	Probable inactive leucine-rich repeat receptor-like protein kinase At1g66830 (Precursor) GN=At1g66830 OS=Arabidopsis thaliana (Mouse-ear cress) PE=2 SV=1	PREDICTED: probable inactive leucine-rich repeat receptor-like protein kinase At1g66830 [Beta vulgaris subsp. vulgaris]
c32164.graph_c0	[T]	Signal transduction mechanisms	Biological Process: protein dephosphorylation (GO:0006470);; Molecular Function: protein tyrosine/serine/threonine phosphatase activity (GO:0008138);;	--	[V]	Defense mechanisms	Dual specificity phosphatase, catalytic domain;; Protein-tyrosine phosphatase	Dual specificity protein phosphatase 1 GN=DSPTP1 OS=Arabidopsis thaliana (Mouse-ear cress) PE=1 SV=1	PREDICTED: dual specificity protein phosphatase 1 [Beta vulgaris subsp. vulgaris]
c10966.graph_c0	[S]	Function unknown	--	K13115|1e-173|pop:POPTR_658951|hypothetical protein	[S]	Function unknown	Family of unknown function (DUF572)	--	PREDICTED: coiled-coil domain-containing protein 130-like [Beta vulgaris subsp. vulgaris]
c11619.graph_c0	[P]	Inorganic ion transport and metabolism	Molecular Function: carbonate dehydratase activity (GO:0004089);; Molecular Function: calcium-transporting ATPase activity (GO:0005388);; Molecular Function: calmodulin binding (GO:0005516);; Molecular Function: ATP binding (GO:0005524);; Cellular Component: endoplasmic reticulum membrane (GO:0005789);; Cellular Component: plasma membrane (GO:0005886);; Biological Process: protein targeting to me…	K01537|0.0|ath:AT4G37640|ACA2	[P]	Inorganic ion transport and metabolism	E1-E2 ATPase;; Cation transporting ATPase, C-terminus;; haloacid dehalogenase-like hydrolase;; Ca2+-ATPase N terminal autoinhibitory domain;; Putative hydrolase of sodium-potassium ATPase alpha subunit;; haloacid dehalogenase-like hydrolase;; Cation transporter/ATPase, N-terminus;; haloacid dehalogenase-like hydrolase	Calcium-transporting ATPase 2, plasma membrane-type GN=ACA2 OS=Arabidopsis thaliana (Mouse-ear cress) PE=1 SV=1	PREDICTED: calcium-transporting ATPase 2, plasma membrane-type-like [Beta vulgaris subsp. vulgaris]
c41623.graph_c0	--	--	--	--	--	--	--	--	PREDICTED: AP2/ERF and B3 domain-containing transcription factor RAV1-like [Beta vulgaris subsp. vulgaris]
c67257.graph_c0	--	--	--	--	[R]	General function prediction only	--	--	PREDICTED: uncharacterized protein LOC103427138 [Malus domestica]
c36502.graph_c0	--	--	Biological Process: transport (GO:0006810);; Biological Process: cellular process (GO:0009987);; Biological Process: single-organism process (GO:0044699);;	--	--	--	No apical meristem (NAM) protein	NAC domain-containing protein 78 GN=T32M21.10 OS=Arabidopsis thaliana (Mouse-ear cress) PE=2 SV=2	PREDICTED: NAC domain-containing protein 74-like [Beta vulgaris subsp. vulgaris]
c28346.graph_c1	--	--	--	--	--	--	Methionine biosynthesis protein MetW	Uncharacterized protein At3g49720 GN=At3g49720 OS=Arabidopsis thaliana (Mouse-ear cress) PE=2 SV=1	PREDICTED: uncharacterized protein At3g49720 [Beta vulgaris subsp. vulgaris]
c17178.graph_c0	--	--	--	K07466|3e-26|vvi:100248803|hypothetical protein LOC100248803	--	--	--	Uncharacterized protein At4g28440 GN=At4g28440 OS=Arabidopsis thaliana (Mouse-ear cress) PE=1 SV=1	PREDICTED: uncharacterized protein At4g28440 [Nelumbo nucifera]
c41625.graph_c0	--	--	--	--	[M]	Cell wall/membrane/envelope biogenesis	Pectinacetylesterase	--	PREDICTED: protein notum homolog [Beta vulgaris subsp. vulgaris]
c30970.graph_c0	--	--	Cellular Component: membrane (GO:0016020);; Molecular Function: hydrolase activity, acting on glycosyl bonds (GO:0016798);;	--	--	--	Glycosyl hydrolase family 79, N-terminal domain	Heparanase-like protein 1 (Precursor) GN=At5g07830 OS=Arabidopsis thaliana (Mouse-ear cress) PE=2 SV=1	PREDICTED: heparanase-like protein 2 [Beta vulgaris subsp. vulgaris]
c39345.graph_c0	--	--	Molecular Function: ligase activity (GO:0016874);; Biological Process: cellular protein metabolic process (GO:0044267);;	--	[R]	General function prediction only	Galactose oxidase, central domain;; Galactose oxidase, central domain;; Kelch motif;; Kelch motif;; Kelch motif;; Kelch motif;; F-box-like;; F-box domain	F-box/kelch-repeat protein At1g51550 GN=At1g51550 OS=Arabidopsis thaliana (Mouse-ear cress) PE=2 SV=1	PREDICTED: F-box/kelch-repeat protein At1g51550 [Beta vulgaris subsp. vulgaris]
c20119.graph_c0	--	--	Molecular Function: peptidase activity, acting on L-amino acid peptides (GO:0070011);;	--	[WV]	--	--	Leucine-rich repeat extensin-like protein 3 (Precursor) GN=LRX3 OS=Arabidopsis thaliana (Mouse-ear cress) PE=1 SV=1	PREDICTED: uncharacterized protein LOC102602011 [Solanum tuberosum]
c42550.graph_c0	--	--	--	--	--	--	Protein of unknown function (DUF3339)	--	PREDICTED: uncharacterized protein LOC104897542 [Beta vulgaris subsp. vulgaris]
c5383.graph_c0	--	--	Molecular Function: nucleic acid binding (GO:0003676);; Molecular Function: zinc ion binding (GO:0008270);; Biological Process: DNA integration (GO:0015074);;	--	[R]	General function prediction only	Reverse transcriptase (RNA-dependent DNA polymerase)	Uncharacterized mitochondrial protein AtMg00820 GN=AtMg00820 OS=Arabidopsis thaliana (Mouse-ear cress) PE=4 SV=1	hypothetical protein VITISV_012360 [Vitis vinifera]
c27113.graph_c0	--	--	Cellular Component: integral component of membrane (GO:0016021);;	--	[I]	Lipid transport and metabolism	Plasma-membrane choline transporter;; Plasma-membrane choline transporter	--	hypothetical protein M569_00160 [Genlisea aurea]
c20410.graph_c0	--	--	Cellular Component: endosome (GO:0005768);; Cellular Component: vacuolar membrane (GO:0005774);; Cellular Component: trans-Golgi network (GO:0005802);; Molecular Function: methyltransferase activity (GO:0008168);; Cellular Component: plant-type cell wall (GO:0009505);; Biological Process: isopentenyl diphosphate biosynthetic process, methylerythritol 4-phosphate pathway (GO:0019288);; Biological …	--	--	--	Putative S-adenosyl-L-methionine-dependent methyltransferase;; Methyltransferase domain	Probable methyltransferase PMT14 GN=At4g18030 OS=Arabidopsis thaliana (Mouse-ear cress) PE=2 SV=1	PREDICTED: probable methyltransferase PMT14 [Beta vulgaris subsp. vulgaris]
c49362.graph_c0	--	--	--	--	[R]	General function prediction only	gag-polypeptide of LTR copia-type;; Retrotransposon gag protein	--	PREDICTED: uncharacterized protein LOC104905511 [Beta vulgaris subsp. vulgaris]
c31252.graph_c1	--	--	--	--	--	--	--	F-box protein SKIP23 GN=SKIP23 OS=Arabidopsis thaliana (Mouse-ear cress) PE=1 SV=1	PREDICTED: F-box protein SKIP23-like [Beta vulgaris subsp. vulgaris]
c13974.graph_c0	--	--	--	--	--	--	--	--	hypothetical protein CARUB_v10007708mg [Capsella rubella]
c30765.graph_c0	--	--	--	--	--	--	Helix-loop-helix DNA-binding domain	Transcription factor bHLH18 GN=T30L20.1 OS=Arabidopsis thaliana (Mouse-ear cress) PE=2 SV=1	PREDICTED: transcription factor bHLH18-like [Beta vulgaris subsp. vulgaris]
c30791.graph_c0	[O]	Posttranslational modification, protein turnover, chaperones	--	K03686|0.0|vvi:100268135|hypothetical protein LOC100268135	[O]	Posttranslational modification, protein turnover, chaperones	DnaJ C terminal domain;; DnaJ domain;; DnaJ central domain	DnaJ protein homolog 2 (Precursor) GN=LDJ2 OS=Allium porrum (Leek) PE=2 SV=1	PREDICTED: dnaJ homolog 1, mitochondrial-like [Beta vulgaris subsp. vulgaris]
c10173.graph_c0	--	--	--	--	--	--	--	--	PREDICTED: homeobox-leucine zipper protein HAT7-like [Beta vulgaris subsp. vulgaris]
c37892.graph_c0	--	--	Molecular Function: DNA binding (GO:0003677);; Molecular Function: sequence-specific DNA binding transcription factor activity (GO:0003700);; Cellular Component: nucleus (GO:0005634);; Biological Process: regulation of transcription, DNA-templated (GO:0006355);; Molecular Function: protein dimerization activity (GO:0046983);;	--	[K]	Transcription	K-box region;; SRF-type transcription factor (DNA-binding and dimerisation domain)	MADS-box protein CMB2 GN=CMB2 OS=Dianthus caryophyllus (Carnation) PE=2 SV=1	RecName: Full=MADS-box protein CMB2 [Dianthus caryophyllus]
c43177.graph_c0	--	--	--	--	[L]	Replication, recombination and repair	Nucleotidyltransferase domain	--	PREDICTED: uncharacterized protein LOC104898183 [Beta vulgaris subsp. vulgaris]
c18460.graph_c0	--	--	--	--	--	--	--	--	PREDICTED: serine/threonine-protein kinase BLUS1 isoform X2 [Beta vulgaris subsp. vulgaris]
c32260.graph_c0	--	--	--	--	[K]	Transcription	MIZ/SP-RING zinc finger;; SAP domain	E3 SUMO-protein ligase SIZ1 OS=Arabidopsis thaliana (Mouse-ear cress) PE=1 SV=2	PREDICTED: E3 SUMO-protein ligase SIZ1-like [Beta vulgaris subsp. vulgaris]
c20088.graph_c0	--	--	Molecular Function: protein tyrosine phosphatase activity (GO:0004725);; Biological Process: peptidyl-tyrosine dephosphorylation (GO:0035335);;	--	[R]	General function prediction only	Acid Phosphatase;; Haloacid dehalogenase-like hydrolase;; NLI interacting factor-like phosphatase	--	PREDICTED: magnesium-dependent phosphatase 1 [Beta vulgaris subsp. vulgaris]
c34417.graph_c0	[RTKL]	--	Molecular Function: protein serine/threonine kinase activity (GO:0004674);; Molecular Function: ATP binding (GO:0005524);; Biological Process: protein phosphorylation (GO:0006468);; Cellular Component: integral component of membrane (GO:0016021);;	--	--	--	Protein kinase domain;; Protein tyrosine kinase;; Leucine Rich repeats (2 copies);; Leucine rich repeat N-terminal domain;; Leucine Rich Repeat;; Leucine rich repeat;; Leucine Rich repeat	Probable LRR receptor-like serine/threonine-protein kinase At5g45780 (Precursor) GN=At5g45780 OS=Arabidopsis thaliana (Mouse-ear cress) PE=2 SV=1	PREDICTED: probable LRR receptor-like serine/threonine-protein kinase At5g45780 [Beta vulgaris subsp. vulgaris]
c9977.graph_c0	--	--	--	--	--	--	--	--	PREDICTED: uncharacterized protein LOC104898613 [Beta vulgaris subsp. vulgaris]
c41876.graph_c0	--	--	--	--	--	--	TPR repeat;; Tetratricopeptide repeat;; Tetratricopeptide repeat;; Tetratricopeptide repeat	--	PREDICTED: uncharacterized protein LOC104903552 [Beta vulgaris subsp. vulgaris]
c17535.graph_c0	[R]	General function prediction only	Molecular Function: ATP binding (GO:0005524);; Cellular Component: mitochondrion (GO:0005739);; Biological Process: GPI anchor metabolic process (GO:0006505);; Biological Process: fatty acid beta-oxidation (GO:0006635);; Biological Process: intracellular protein transport (GO:0006886);; Molecular Function: hydrolase activity, acting on ester bonds (GO:0016788);; Cellular Component: intrinsic comp…	--	[R]	General function prediction only	Alpha/beta hydrolase family;; Alpha/beta hydrolase family;; alpha/beta hydrolase fold;; PGAP1-like protein	--	PREDICTED: alpha/beta hydrolase domain-containing protein 11 [Beta vulgaris subsp. vulgaris]
c70982.graph_c0	--	--	--	--	--	--	--	--	PREDICTED: uncharacterized protein LOC104897720 isoform X8 [Beta vulgaris subsp. vulgaris]
c40403.graph_c2	--	--	--	--	[S]	Function unknown	--	--	PREDICTED: nuclear speckle splicing regulatory protein 1-like [Beta vulgaris subsp. vulgaris]
c40749.graph_c0	--	--	Molecular Function: binding (GO:0005488);;	--	[L]	Replication, recombination and repair	Domain of unknown function (DUF4413)	Zinc finger BED domain-containing protein DAYSLEEPER GN=HAT OS=Arabidopsis thaliana (Mouse-ear cress) PE=1 SV=1	PREDICTED: zinc finger BED domain-containing protein RICESLEEPER 2-like [Beta vulgaris subsp. vulgaris]
c38096.graph_c0	--	--	--	--	--	--	--	--	PREDICTED: G-type lectin S-receptor-like serine/threonine-protein kinase SD2-5 isoform X1 [Beta vulgaris subsp. vulgaris]
c35202.graph_c1	--	--	--	--	--	--	--	Peptidyl-prolyl cis-trans isomerase CYP95 GN=F8B4.120 OS=Arabidopsis thaliana (Mouse-ear cress) PE=1 SV=2	PREDICTED: uncharacterized protein LOC104897629 [Beta vulgaris subsp. vulgaris]
c10684.graph_c0	[R]	General function prediction only	Molecular Function: nucleotide binding (GO:0000166);; Molecular Function: nucleic acid binding (GO:0003676);; Cellular Component: nucleus (GO:0005634);; Biological Process: mRNA processing (GO:0006397);;	--	[A]	RNA processing and modification	--	--	PREDICTED: squamous cell carcinoma antigen recognized by T-cells 3 [Beta vulgaris subsp. vulgaris]
c37456.graph_c0	--	--	--	--	--	--	FBD;; F-box domain	F-box/FBD/LRR-repeat protein At5g22660 GN=At5g22660 OS=Arabidopsis thaliana (Mouse-ear cress) PE=2 SV=1	PREDICTED: F-box/FBD/LRR-repeat protein At5g22660-like [Beta vulgaris subsp. vulgaris]
c40151.graph_c1	--	--	Molecular Function: nucleic acid binding (GO:0003676);; Molecular Function: zinc ion binding (GO:0008270);; Biological Process: DNA integration (GO:0015074);;	--	[R]	General function prediction only	--	--	putative copia-like polyprotein [Solanum lycopersicum]
c37247.graph_c0	--	--	--	--	[L]	Replication, recombination and repair	Domain of unknown function (DUF1771);; Smr domain;; Ataxin-2 C-terminal region	Polyadenylate-binding protein-interacting protein 7 GN=CID7 OS=Arabidopsis thaliana (Mouse-ear cress) PE=1 SV=1	PREDICTED: polyadenylate-binding protein-interacting protein 7 [Beta vulgaris subsp. vulgaris]
c18565.graph_c0	[RTKL]	--	--	--	[T]	Signal transduction mechanisms	Protein kinase domain;; Protein tyrosine kinase	Probable LRR receptor-like serine/threonine-protein kinase At1g51820 (Precursor) GN=At1g51820 OS=Arabidopsis thaliana (Mouse-ear cress) PE=2 SV=1	PREDICTED: cysteine-rich receptor-like protein kinase 27 [Beta vulgaris subsp. vulgaris]
c18367.graph_c1	--	--	Biological Process: biosynthetic process (GO:0009058);; Molecular Function: isomerase activity (GO:0016853);;	K06998|2e-11|vvi:100244215|hypothetical protein LOC100244215	[R]	General function prediction only	--	--	PREDICTED: phenazine biosynthesis-like domain-containing protein 1 isoform X2 [Beta vulgaris subsp. vulgaris]
c69997.graph_c0	--	--	--	--	--	--	Reverse transcriptase-like	--	PREDICTED: uncharacterized protein LOC104903088 [Beta vulgaris subsp. vulgaris]
c40157.graph_c0	--	--	--	--	--	--	--	--	PREDICTED: uncharacterized protein LOC104899642 [Beta vulgaris subsp. vulgaris]
c17781.graph_c0	--	--	--	--	--	--	--	Probable purine permease 10 GN=PUP10 OS=Arabidopsis thaliana (Mouse-ear cress) PE=2 SV=2	PREDICTED: probable purine permease 11 isoform X1 [Beta vulgaris subsp. vulgaris]
c35061.graph_c1	[IQR]	--	Molecular Function: 3-oxoacyl-[acyl-carrier-protein] reductase (NADPH) activity (GO:0004316);; Biological Process: oxidation-reduction process (GO:0055114);;	--	[R]	General function prediction only	Enoyl-(Acyl carrier protein) reductase;; short chain dehydrogenase	Xanthoxin dehydrogenase GN=At1g52340 OS=Arabidopsis thaliana (Mouse-ear cress) PE=1 SV=1	PREDICTED: secoisolariciresinol dehydrogenase-like [Beta vulgaris subsp. vulgaris]
c20164.graph_c0	--	--	--	--	--	--	--	--	PREDICTED: uncharacterized protein LOC100827823 [Brachypodium distachyon]
c46791.graph_c0	--	--	--	--	--	--	Putative S-adenosyl-L-methionine-dependent methyltransferase	Probable methyltransferase PMT16 GN=At2g45750 OS=Arabidopsis thaliana (Mouse-ear cress) PE=3 SV=1	PREDICTED: probable methyltransferase PMT15 [Beta vulgaris subsp. vulgaris]
c53941.graph_c0	[R]	General function prediction only	Molecular Function: protein binding (GO:0005515);; Biological Process: embryo development ending in seed dormancy (GO:0009793);;	--	[OT]	--	Ankyrin repeat;; Ankyrin repeats (3 copies);; Ankyrin repeats (many copies);; Ankyrin repeats (many copies);; Ankyrin repeat	Ankyrin repeat domain-containing protein EMB506, chloroplastic (Precursor) GN=EMB506 OS=Arabidopsis thaliana (Mouse-ear cress) PE=1 SV=1	hypothetical protein GGTG_12946 [Gaeumannomyces graminis var. tritici R3-111a-1]
c40862.graph_c2	--	--	--	--	--	--	--	Protein translocase subunit SecA, chloroplastic (Precursor) GN=secA OS=Spinacia oleracea (Spinach) PE=2 SV=1	--
c27676.graph_c0	--	--	--	--	--	--	BURP domain	Probable polygalacturonase non-catalytic subunit JP650 (Precursor) GN=JP650 OS=Arabidopsis thaliana (Mouse-ear cress) PE=2 SV=2	PREDICTED: probable polygalacturonase non-catalytic subunit JP650 [Beta vulgaris subsp. vulgaris]
c36802.graph_c0	--	--	--	--	--	--	--	--	PREDICTED: uncharacterized protein LOC104895685 [Beta vulgaris subsp. vulgaris]
c39532.graph_c0	--	--	--	--	--	--	PHD-finger	Methyl-CpG-binding domain-containing protein 9 GN=MBD9 OS=Arabidopsis thaliana (Mouse-ear cress) PE=2 SV=1	PREDICTED: uncharacterized protein LOC104887980 isoform X1 [Beta vulgaris subsp. vulgaris]
c73601.graph_c0	[V]	Defense mechanisms	Molecular Function: ATP binding (GO:0005524);; Biological Process: ATP catabolic process (GO:0006200);; Molecular Function: xenobiotic-transporting ATPase activity (GO:0008559);; Molecular Function: phosphate ion transmembrane-transporting ATPase activity (GO:0015415);; Cellular Component: integral component of membrane (GO:0016021);; Biological Process: transmembrane transport (GO:0055085);;	K05658|3e-46|rcu:RCOM_1343570|multidrug resistance protein 1, 2, putative (EC:3.6.3.27 3.6.3.44)	[Q]	Secondary metabolites biosynthesis, transport and catabolism	ABC transporter	ABC transporter B family member 11 GN=T14P4.15 OS=Arabidopsis thaliana (Mouse-ear cress) PE=2 SV=1	hypothetical protein VITISV_020814 [Vitis vinifera]
c75751.graph_c0	[G]	Carbohydrate transport and metabolism	Molecular Function: hydrolase activity, hydrolyzing O-glycosyl compounds (GO:0004553);; Biological Process: carbohydrate metabolic process (GO:0005975);;	--	[G]	Carbohydrate transport and metabolism	Glycosyl hydrolase family 1	Cyanogenic beta-glucosidase (Precursor; Fragment) GN=LI OS=Trifolium repens (Creeping white clover) PE=1 SV=1	PREDICTED: beta-glucosidase 24-like [Pyrus x bretschneideri]
c41093.graph_c0	--	--	Biological Process: defense response (GO:0006952);; Biological Process: response to other organism (GO:0051707);;	--	--	--	Gamma-thionin family	Defensin-like protein AX1 OS=Beta vulgaris (Sugar beet) PE=1 SV=1	PREDICTED: defensin-like protein AX1 [Beta vulgaris subsp. vulgaris]
c44263.graph_c0	--	--	--	--	--	--	--	--	PREDICTED: uncharacterized protein LOC104892907 [Beta vulgaris subsp. vulgaris]
c37406.graph_c1	[I]	Lipid transport and metabolism	Molecular Function: phospholipase D activity (GO:0004630);; Molecular Function: calcium ion binding (GO:0005509);; Cellular Component: membrane (GO:0016020);; Biological Process: lipid catabolic process (GO:0016042);; Biological Process: phosphatidylcholine metabolic process (GO:0046470);; Molecular Function: NAPE-specific phospholipase D activity (GO:0070290);;	--	[I]	Lipid transport and metabolism	C2 domain;; Phospholipase D Active site motif	Phospholipase D beta 1 GN=PLDBETA1 OS=Arabidopsis thaliana (Mouse-ear cress) PE=2 SV=4	PREDICTED: phospholipase D beta 1-like [Beta vulgaris subsp. vulgaris]
c40631.graph_c0	--	--	--	--	[R]	General function prediction only	PPR repeat family;; PPR repeat;; Pentatricopeptide repeat domain;; PPR repeat;; DYW family of nucleic acid deaminases	Pentatricopeptide repeat-containing protein At3g24000, mitochondrial (Precursor) GN=PCMP-H87 OS=Arabidopsis thaliana (Mouse-ear cress) PE=3 SV=1	PREDICTED: pentatricopeptide repeat-containing protein At3g24000, mitochondrial-like [Beta vulgaris subsp. vulgaris]
c6157.graph_c0	--	--	--	--	--	--	--	--	PREDICTED: F-box protein SKIP23-like [Beta vulgaris subsp. vulgaris]
c12540.graph_c0	--	--	Biological Process: signal transduction (GO:0007165);; Biological Process: monocarboxylic acid metabolic process (GO:0032787);; Biological Process: primary metabolic process (GO:0044238);; Biological Process: cellular macromolecule catabolic process (GO:0044265);; Molecular Function: metal ion binding (GO:0046872);; Biological Process: gametophyte development (GO:0048229);; Biological Process: an…	--	[O]	Posttranslational modification, protein turnover, chaperones	Ring finger domain;; RING-H2 zinc finger;; Zinc finger, C3HC4 type (RING finger);; Zinc finger, C3HC4 type (RING finger)	E3 ubiquitin-protein ligase RHF2A GN=RHF2A OS=Arabidopsis thaliana (Mouse-ear cress) PE=2 SV=1	PREDICTED: E3 ubiquitin-protein ligase RHF2A [Beta vulgaris subsp. vulgaris]
c36293.graph_c0	[O]	Posttranslational modification, protein turnover, chaperones	Molecular Function: nucleotide binding (GO:0000166);; Cellular Component: chloroplast thylakoid (GO:0009534);; Molecular Function: oxidoreductase activity (GO:0016491);; Biological Process: oxidation-reduction process (GO:0055114);;	--	--	--	Saccharopine dehydrogenase;; DnaJ domain;; DnaJ C terminal domain	DnaJ protein ERDJ3B (Precursor) GN=F26K9.30 OS=Arabidopsis thaliana (Mouse-ear cress) PE=1 SV=1	PREDICTED: uncharacterized protein LOC104890046 [Beta vulgaris subsp. vulgaris]
c26045.graph_c0	[O]	Posttranslational modification, protein turnover, chaperones	Biological Process: protein peptidyl-prolyl isomerization (GO:0000413);; Molecular Function: peptidyl-prolyl cis-trans isomerase activity (GO:0003755);; Cellular Component: endosome (GO:0005768);; Cellular Component: Golgi apparatus (GO:0005794);; Cellular Component: trans-Golgi network (GO:0005802);; Biological Process: protein folding (GO:0006457);;	--	[O]	Posttranslational modification, protein turnover, chaperones	Cyclophilin type peptidyl-prolyl cis-trans isomerase/CLD	Peptidyl-prolyl cis-trans isomerase CYP23 (Precursor) GN=T2P11.13 OS=Arabidopsis thaliana (Mouse-ear cress) PE=2 SV=1	PREDICTED: peptidyl-prolyl cis-trans isomerase CYP23 [Beta vulgaris subsp. vulgaris]
c71044.graph_c0	--	--	Molecular Function: nucleotide binding (GO:0000166);; Molecular Function: protein kinase activity (GO:0004672);; Biological Process: phosphorylation (GO:0016310);;	--	--	--	--	G-type lectin S-receptor-like serine/threonine-protein kinase At2g19130 (Precursor) GN=At2g19130 OS=Arabidopsis thaliana (Mouse-ear cress) PE=2 SV=1	PREDICTED: G-type lectin S-receptor-like serine/threonine-protein kinase At2g19130 [Beta vulgaris subsp. vulgaris]
c11053.graph_c0	[E]	Amino acid transport and metabolism	--	--	[E]	Amino acid transport and metabolism	POT family;; Arginase family	Protein NRT1/ PTR FAMILY 7.3 GN=F5D14.23 OS=Arabidopsis thaliana (Mouse-ear cress) PE=1 SV=2	PREDICTED: protein NRT1/ PTR FAMILY 7.3-like [Beta vulgaris subsp. vulgaris]
c40494.graph_c0	[R]	General function prediction only	--	--	[R]	General function prediction only	Ankyrin repeats (3 copies);; Ankyrin repeats (many copies);; Ankyrin repeat;; Domain of unknown function;; Ankyrin repeats (many copies);; Ankyrin repeat	Ankyrin repeat-containing protein At5g02620 GN=At5g02620 OS=Arabidopsis thaliana (Mouse-ear cress) PE=1 SV=1	PREDICTED: ankyrin repeat-containing protein At5g02620 [Vitis vinifera]
c34066.graph_c0	--	--	--	--	--	--	--	--	PREDICTED: uncharacterized protein LOC104888440 [Beta vulgaris subsp. vulgaris]
c18641.graph_c0	--	--	--	--	[M]	Cell wall/membrane/envelope biogenesis	--	Mechanosensitive ion channel protein 10 GN=MSL10 OS=Arabidopsis thaliana (Mouse-ear cress) PE=1 SV=1	PREDICTED: mechanosensitive ion channel protein 10-like [Beta vulgaris subsp. vulgaris]
c13050.graph_c0	[I]	Lipid transport and metabolism	--	K01115|0.0|vvi:100261987|similar to PLDP1 (PHOSPHOLIPASE D ZETA1)	[I]	Lipid transport and metabolism	PLD-like domain;; Phospholipase D Active site motif	Phospholipase D p1 OS=Arabidopsis thaliana (Mouse-ear cress) PE=1 SV=1	PREDICTED: phospholipase D p1 isoform X1 [Beta vulgaris subsp. vulgaris]
c31869.graph_c0	--	--	--	--	--	--	--	Protein FAR1-RELATED SEQUENCE 6 GN=FRS6 OS=Arabidopsis thaliana (Mouse-ear cress) PE=2 SV=1	PREDICTED: protein FAR1-RELATED SEQUENCE 6-like [Beta vulgaris subsp. vulgaris]
c11969.graph_c0	[C]	Energy production and conversion	Molecular Function: retinal dehydrogenase activity (GO:0001758);; Molecular Function: aldehyde dehydrogenase (NAD) activity (GO:0004029);; Biological Process: oxidation-reduction process (GO:0055114);;	K00128|0.0|vvi:100267386|hypothetical protein LOC100267386	[C]	Energy production and conversion	Aldehyde dehydrogenase family	Aldehyde dehydrogenase family 2 member B7, mitochondrial (Precursor) OS=Arabidopsis thaliana (Mouse-ear cress) PE=2 SV=2	PREDICTED: aldehyde dehydrogenase family 2 member B7, mitochondrial-like isoform X1 [Beta vulgaris subsp. vulgaris]
c77964.graph_c0	--	--	Molecular Function: nucleic acid binding (GO:0003676);; Molecular Function: zinc ion binding (GO:0008270);;	--	[R]	General function prediction only	--	--	PREDICTED: uncharacterized protein LOC104896496 [Beta vulgaris subsp. vulgaris]
c5914.graph_c0	--	--	--	--	[T]	Signal transduction mechanisms	--	--	PREDICTED: uncharacterized protein LOC102588694 [Solanum tuberosum]
c33473.graph_c0	--	--	Molecular Function: zinc ion binding (GO:0008270);;	--	[TZ]	--	Protein of unknown function (DUF3633);; Protein of unknown function (DUF3633)	Protein DA1-related 2 GN=DAR2 OS=Arabidopsis thaliana (Mouse-ear cress) PE=2 SV=1	PREDICTED: protein DA1-related 2 isoform X1 [Beta vulgaris subsp. vulgaris]
c32812.graph_c0	--	--	--	--	--	--	Ataxin-2 C-terminal region	Polyadenylate-binding protein-interacting protein 4 GN=CID4 OS=Arabidopsis thaliana (Mouse-ear cress) PE=2 SV=1	PREDICTED: uncharacterized protein LOC104891671 [Beta vulgaris subsp. vulgaris]
c32670.graph_c0	[RTKL]	--	Molecular Function: protein serine/threonine kinase activity (GO:0004674);; Molecular Function: ATP binding (GO:0005524);; Biological Process: protein phosphorylation (GO:0006468);;	--	[G]	Carbohydrate transport and metabolism	Protein kinase domain;; Protein tyrosine kinase	Shaggy-related protein kinase kappa GN=ASK10 OS=Arabidopsis thaliana (Mouse-ear cress) PE=2 SV=2	PREDICTED: shaggy-related protein kinase kappa isoform X1 [Beta vulgaris subsp. vulgaris]
c40756.graph_c1	[J]	Translation, ribosomal structure and biogenesis	Molecular Function: structural constituent of ribosome (GO:0003735);; Cellular Component: ribosome (GO:0005840);; Biological Process: translation (GO:0006412);;	K02953|1e-98|vvi:100242146|hypothetical protein LOC100242146	[J]	Translation, ribosomal structure and biogenesis	Ribosomal S13/S15 N-terminal domain;; Ribosomal protein S15	40S ribosomal protein S13 GN=RPS13 OS=Glycine max (Soybean) PE=2 SV=1	PREDICTED: 40S ribosomal protein S13 [Beta vulgaris subsp. vulgaris]
c1986.graph_c0	--	--	--	--	[R]	General function prediction only	Domain of unknown function (DUF4283);; Zinc knuckle	--	PREDICTED: uncharacterized protein LOC104895546 [Beta vulgaris subsp. vulgaris]
c13988.graph_c0	[R]	General function prediction only	--	--	--	--	--	--	PREDICTED: histone-lysine N-methyltransferase, H3 lysine-79 specific-like [Beta vulgaris subsp. vulgaris]
c17128.graph_c0	--	--	Cellular Component: Golgi apparatus (GO:0005794);; Molecular Function: carbon-monoxide oxygenase activity (GO:0008805);; Biological Process: response to sucrose (GO:0009744);; Biological Process: response to glucose (GO:0009749);; Biological Process: response to fructose (GO:0009750);; Cellular Component: integral component of membrane (GO:0016021);;	K08360|1e-131|pop:POPTR_743692|carbon-monoxide oxygenase	[C]	Energy production and conversion	Eukaryotic cytochrome b561	Probable transmembrane ascorbate ferrireductase 2 GN=At5g38630 OS=Arabidopsis thaliana (Mouse-ear cress) PE=1 SV=1	PREDICTED: probable transmembrane ascorbate ferrireductase 2 isoform X1 [Beta vulgaris subsp. vulgaris]
c17370.graph_c0	--	--	--	--	[S]	Function unknown	Armadillo/beta-catenin-like repeat;; BTB/POZ domain;; HEAT repeats;; HEAT-like repeat;; V-ATPase subunit H;; HEAT repeat;; Armadillo-like;; PBS lyase HEAT-like repeat	ARM REPEAT PROTEIN INTERACTING WITH ABF2 GN=ARIA OS=Arabidopsis thaliana (Mouse-ear cress) PE=1 SV=2	PREDICTED: ARM REPEAT PROTEIN INTERACTING WITH ABF2-like [Beta vulgaris subsp. vulgaris]
c19096.graph_c0	--	--	--	--	--	--	--	U-box domain-containing protein 26 GN=PUB26 OS=Arabidopsis thaliana (Mouse-ear cress) PE=2 SV=1	PREDICTED: U-box domain-containing protein 26 [Beta vulgaris subsp. vulgaris]
c14819.graph_c0	--	--	--	--	--	--	--	--	PREDICTED: uncharacterized protein LOC104907426 [Beta vulgaris subsp. vulgaris]
c70467.graph_c0	--	--	--	--	[R]	General function prediction only	--	Uncharacterized mitochondrial protein AtMg00820 GN=AtMg00820 OS=Arabidopsis thaliana (Mouse-ear cress) PE=4 SV=1	PREDICTED: uncharacterized protein LOC104908978 [Beta vulgaris subsp. vulgaris]
c76595.graph_c0	--	--	Cellular Component: nucleus (GO:0005634);; Cellular Component: cytoplasm (GO:0005737);; Biological Process: plant-type cell wall modification (GO:0009827);; Biological Process: pollen tube growth (GO:0009860);; Biological Process: actin cytoskeleton organization (GO:0030036);; Biological Process: actin filament-based movement (GO:0030048);; Cellular Component: pollen tube tip (GO:0090404);;	--	--	--	Armadillo/beta-catenin-like repeat	--	PREDICTED: uncharacterized protein LOC104903951 [Beta vulgaris subsp. vulgaris]
c46443.graph_c0	--	--	Molecular Function: inositol hexakisphosphate binding (GO:0000822);; Biological Process: auxin-activated signaling pathway (GO:0009734);;	--	--	--	F-box-like	--	PREDICTED: protein TRANSPORT INHIBITOR RESPONSE 1-like [Beta vulgaris subsp. vulgaris]
c43478.graph_c0	--	--	--	--	--	--	Protein of unknown function (DUF3550/UPF0682)	--	PREDICTED: protein SCAI [Beta vulgaris subsp. vulgaris]
c42471.graph_c0	--	--	--	--	[R]	General function prediction only	Yippee zinc-binding/DNA-binding /Mis18, centromere assembly	Protein yippee-like At5g53940 GN=At5g53940 OS=Arabidopsis thaliana (Mouse-ear cress) PE=2 SV=1	PREDICTED: protein yippee-like At5g53940 isoform X1 [Beta vulgaris subsp. vulgaris]
c37604.graph_c0	--	--	Cellular Component: chloroplast (GO:0009507);;	--	--	--	Uncharacterized integral membrane protein (DUF2301)	--	PREDICTED: uncharacterized protein LOC104897453 isoform X2 [Beta vulgaris subsp. vulgaris]
c31738.graph_c0	[O]	Posttranslational modification, protein turnover, chaperones	Molecular Function: amino acid binding (GO:0016597);; Biological Process: dolichol biosynthetic process (GO:0019408);;	--	--	--	ACT domain;; ACT domain;; ACT domain	ACT domain-containing protein ACR6 {ECO:0000305} OS=Arabidopsis thaliana (Mouse-ear cress) PE=2 SV=1	PREDICTED: uncharacterized protein LOC104895235 [Beta vulgaris subsp. vulgaris]
c59672.graph_c0	--	--	--	--	[R]	General function prediction only	--	--	PREDICTED: uncharacterized protein LOC104884178 [Beta vulgaris subsp. vulgaris]
c35478.graph_c0	--	--	--	--	--	--	Agenet domain	--	PREDICTED: uncharacterized protein LOC104892759 [Beta vulgaris subsp. vulgaris]
c17538.graph_c0	--	--	--	--	--	--	--	--	Dof zinc finger DOF2.4 -like protein [Gossypium arboreum]
c17618.graph_c0	[M]	Cell wall/membrane/envelope biogenesis	Molecular Function: transferase activity (GO:0016740);;	--	--	--	Cellulose synthase;; Glycosyl transferase family group 2;; Glycosyltransferase like family 2	Cellulose synthase-like protein G2 OS=Arabidopsis thaliana (Mouse-ear cress) PE=2 SV=1	PREDICTED: cellulose synthase-like protein G2 [Beta vulgaris subsp. vulgaris]
c14067.graph_c0	--	--	Molecular Function: binding (GO:0005488);;	--	[R]	General function prediction only	--	--	gag-pol polymerase [Arabidopsis lyrata subsp. lyrata]
c41202.graph_c0	[R]	General function prediction only	Cellular Component: peroxisome (GO:0005777);; Biological Process: sulfur compound metabolic process (GO:0006790);; Molecular Function: sulfite oxidase activity (GO:0008482);; Molecular Function: electron carrier activity (GO:0009055);; Biological Process: response to sulfur dioxide (GO:0010477);; Biological Process: chlorophyll metabolic process (GO:0015994);; Molecular Function: molybdenum ion b…	K00387|0.0|vvi:100263528|hypothetical protein LOC100263528	[C]	Energy production and conversion	Oxidoreductase molybdopterin binding domain;; Mo-co oxidoreductase dimerisation domain	Sulfite oxidase OS=Arabidopsis thaliana (Mouse-ear cress) PE=1 SV=1	PREDICTED: sulfite oxidase isoform X1 [Beta vulgaris subsp. vulgaris]
c5986.graph_c0	[RTKL]	--	Molecular Function: calmodulin-dependent protein kinase activity (GO:0004683);; Molecular Function: calcium ion binding (GO:0005509);; Molecular Function: ATP binding (GO:0005524);; Biological Process: protein phosphorylation (GO:0006468);;	K13412|2e-45|rcu:RCOM_0942060|calcium-dependent protein kinase, putative (EC:2.7.11.17)	[T]	Signal transduction mechanisms	Protein kinase domain;; Protein tyrosine kinase	Calcium-dependent protein kinase 1 GN=MUK11.19 OS=Arabidopsis thaliana (Mouse-ear cress) PE=1 SV=1	PREDICTED: calcium-dependent protein kinase 26-like [Beta vulgaris subsp. vulgaris]
c30371.graph_c0	--	--	Molecular Function: zinc ion binding (GO:0008270);; Molecular Function: kinase activity (GO:0016301);; Biological Process: phosphorylation (GO:0016310);;	--	--	--	--	--	PREDICTED: protein FAR1-RELATED SEQUENCE 5-like [Beta vulgaris subsp. vulgaris]
c41044.graph_c0	[G]	Carbohydrate transport and metabolism	Molecular Function: 6-phosphofructo-2-kinase activity (GO:0003873);; Molecular Function: fructose-2,6-bisphosphate 2-phosphatase activity (GO:0004331);; Molecular Function: ATP binding (GO:0005524);; Cellular Component: cytosol (GO:0005829);; Cellular Component: plasma membrane (GO:0005886);; Biological Process: fructose metabolic process (GO:0006000);; Biological Process: fructose 6-phosphate me…	K01103|0.0|vvi:100244966|hypothetical protein LOC100244966	[G]	Carbohydrate transport and metabolism	6-phosphofructo-2-kinase;; Histidine phosphatase superfamily (branch 1);; AAA domain;; Starch binding domain	Fructose-2,6-bisphosphatase GN=F10K1.19 OS=Arabidopsis thaliana (Mouse-ear cress) PE=1 SV=1	PREDICTED: 6-phosphofructo-2-kinase/fructose-2,6-bisphosphatase [Beta vulgaris subsp. vulgaris]
c42000.graph_c0	[O]	Posttranslational modification, protein turnover, chaperones	Molecular Function: protein binding (GO:0005515);; Biological Process: cellular process (GO:0009987);;	--	--	--	DnaJ domain	Chaperone protein dnaJ 49 OS=Arabidopsis thaliana (Mouse-ear cress) PE=2 SV=2	PREDICTED: uncharacterized protein LOC104891211 [Beta vulgaris subsp. vulgaris]
c35947.graph_c0	--	--	--	--	--	--	B3 DNA binding domain	B3 domain-containing protein Os06g0194400 OS=Oryza sativa subsp. japonica (Rice) PE=2 SV=1	PREDICTED: B3 domain-containing protein At5g42700-like [Beta vulgaris subsp. vulgaris]
c27100.graph_c1	--	--	--	--	--	--	--	--	PREDICTED: uncharacterized protein LOC104229240 [Nicotiana sylvestris]
c34537.graph_c0	--	--	--	--	--	--	--	--	PREDICTED: uncharacterized protein LOC104894929 [Beta vulgaris subsp. vulgaris]
c9564.graph_c0	--	--	--	--	[R]	General function prediction only	--	Zinc finger protein ZAT5 GN=ZAT5 OS=Arabidopsis thaliana (Mouse-ear cress) PE=2 SV=1	PREDICTED: zinc finger protein ZAT5-like [Beta vulgaris subsp. vulgaris]
c43031.graph_c0	[S]	Function unknown	Cellular Component: nucleus (GO:0005634);; Biological Process: DNA replication (GO:0006260);;	K10733|1e-116|osa:4327215|Os01g0248600	[S]	Function unknown	GINS complex protein	DNA replication complex GINS protein PSF2 GN=GINS2 OS=Arabidopsis thaliana (Mouse-ear cress) PE=2 SV=2	PREDICTED: DNA replication complex GINS protein PSF2 [Beta vulgaris subsp. vulgaris]
c27995.graph_c0	--	--	Biological Process: cellular component organization (GO:0016043);; Cellular Component: cell part (GO:0044464);; Biological Process: single-organism cellular process (GO:0044763);;	--	--	--	--	--	PREDICTED: uncharacterized protein LOC104907563 [Beta vulgaris subsp. vulgaris]
c70817.graph_c0	--	--	--	--	[R]	General function prediction only	--	--	PREDICTED: uncharacterized protein LOC104885230 [Beta vulgaris subsp. vulgaris]
c34292.graph_c1	--	--	--	--	--	--	--	--	PREDICTED: uncharacterized protein LOC104899316 isoform X2 [Beta vulgaris subsp. vulgaris]
c25595.graph_c0	--	--	Molecular Function: hydrolase activity, hydrolyzing O-glycosyl compounds (GO:0004553);; Biological Process: carbohydrate metabolic process (GO:0005975);;	--	--	--	Glycosyl hydrolases family 17	Glucan endo-1,3-beta-glucosidase 14 (Precursor) GN=At2g27500 OS=Arabidopsis thaliana (Mouse-ear cress) PE=1 SV=2	PREDICTED: glucan endo-1,3-beta-glucosidase 14 isoform X2 [Beta vulgaris subsp. vulgaris]
c50675.graph_c0	--	--	Biological Process: cellular component organization (GO:0016043);; Biological Process: actin filament-based process (GO:0030029);; Cellular Component: intracellular part (GO:0044424);;	--	--	--	--	--	PREDICTED: uncharacterized protein LOC104903951 [Beta vulgaris subsp. vulgaris]
c69934.graph_c0	--	--	--	--	--	--	--	--	putative reverse transcriptase family member [Malus domestica]
c2245.graph_c0	--	--	Molecular Function: calcium ion binding (GO:0005509);;	--	--	--	EF hand;; EF-hand domain pair;; EF-hand domain;; EF hand	--	PREDICTED: uncharacterized protein LOC104902750 [Beta vulgaris subsp. vulgaris]
c59857.graph_c0	--	--	--	--	[R]	General function prediction only	Endonuclease/Exonuclease/phosphatase family	--	PREDICTED: uncharacterized protein LOC104897695 [Beta vulgaris subsp. vulgaris]
c80614.graph_c0	[T]	Signal transduction mechanisms	--	--	--	--	ACT domain	--	--
c879.graph_c0	--	--	--	--	--	--	--	--	hypothetical protein CERSUDRAFT_162701, partial [Ceriporiopsis subvermispora B]
c20638.graph_c0	--	--	Cellular Component: extracellular region (GO:0005576);; Cellular Component: chloroplast (GO:0009507);; Molecular Function: hydrolase activity, acting on ester bonds (GO:0016788);;	--	[R]	General function prediction only	Late exocytosis, associated with Golgi transport	CSC1-like protein RXW8 GN=RXW8 OS=Arabidopsis thaliana (Mouse-ear cress) PE=2 SV=1	PREDICTED: CSC1-like protein RXW8 [Beta vulgaris subsp. vulgaris]
c12472.graph_c0	[O]	Posttranslational modification, protein turnover, chaperones	Molecular Function: serine-type endopeptidase activity (GO:0004252);; Cellular Component: extracellular region (GO:0005576);; Biological Process: proteolysis (GO:0006508);; Molecular Function: 2-alkenal reductase [NAD(P)] activity (GO:0032440);; Molecular Function: identical protein binding (GO:0042802);; Biological Process: negative regulation of catalytic activity (GO:0043086);; Biological Proc…	--	--	--	Subtilase family;; PA domain;; Peptidase inhibitor I9;; Psb28 protein	Subtilisin-like protease SDD1 {ECO:0000303|PubMed:10809670} (Precursor) OS=Arabidopsis thaliana (Mouse-ear cress) PE=2 SV=1	PREDICTED: subtilisin-like protease SDD1 [Beta vulgaris subsp. vulgaris]
c35377.graph_c0	--	--	Cellular Component: mitochondrion (GO:0005739);; Cellular Component: peroxisomal membrane (GO:0005778);; Cellular Component: chloroplast envelope (GO:0009941);;	--	[R]	General function prediction only	Mpv17 / PMP22 family	--	PREDICTED: protein SYM1 [Beta vulgaris subsp. vulgaris]
c38644.graph_c0	[K]	Transcription	Biological Process: meiosis (GO:0007126);;	--	[S]	Function unknown	Meiosis protein SPO22/ZIP4 like;; Tetratricopeptide repeat	Extensin (Precursor) GN=HRGPNT3 OS=Nicotiana tabacum (Common tobacco) PE=2 SV=1	PREDICTED: uncharacterized protein LOC104894465 isoform X2 [Beta vulgaris subsp. vulgaris]
c38765.graph_c0	--	--	--	--	[O]	Posttranslational modification, protein turnover, chaperones	DnaJ domain	--	PREDICTED: uncharacterized protein LOC104895468 isoform X1 [Beta vulgaris subsp. vulgaris]
c43076.graph_c0	--	--	--	--	--	--	--	--	PREDICTED: transcription factor bHLH93 [Beta vulgaris subsp. vulgaris]
c30132.graph_c0	--	--	--	K09284|1e-119|vvi:100246815|hypothetical protein LOC100246815	--	--	AP2 domain	Ethylene-responsive transcription factor RAP2-7 GN=T17D12.11 OS=Arabidopsis thaliana (Mouse-ear cress) PE=2 SV=2	PREDICTED: ethylene-responsive transcription factor RAP2-7-like isoform X4 [Beta vulgaris subsp. vulgaris]
c40223.graph_c0	--	--	--	--	--	--	--	--	PREDICTED: uncharacterized protein LOC104895808 [Beta vulgaris subsp. vulgaris]
c79408.graph_c0	[GER]	--	--	--	--	--	--	--	--
c18761.graph_c0	--	--	Molecular Function: sequence-specific DNA binding transcription factor activity (GO:0003700);; Cellular Component: nucleus (GO:0005634);; Biological Process: protein targeting to vacuole (GO:0006623);; Biological Process: cellular response to starvation (GO:0009267);; Biological Process: vesicle-mediated transport (GO:0016192);; Molecular Function: sequence-specific DNA binding (GO:0043565);; Bio…	--	--	--	bZIP transcription factor;; Basic region leucine zipper	Ocs element-binding factor 1 GN=OBF1 OS=Zea mays (Maize) PE=2 SV=2	PREDICTED: ocs element-binding factor 1 [Beta vulgaris subsp. vulgaris]
c19363.graph_c0	--	--	--	--	--	--	--	--	Altered inheritance of mitochondria protein 32 [Glycine soja]
c40610.graph_c2	[L]	Replication, recombination and repair	--	--	[R]	General function prediction only	Integrase core domain	--	PREDICTED: uncharacterized protein LOC104906241 [Beta vulgaris subsp. vulgaris]
c26993.graph_c0	--	--	--	--	--	--	Stress up-regulated Nod 19;; Stress up-regulated Nod 19	--	PREDICTED: uncharacterized protein LOC104885143 [Beta vulgaris subsp. vulgaris]
c43325.graph_c0	--	--	--	--	--	--	--	--	PREDICTED: uncharacterized protein LOC104904276 [Beta vulgaris subsp. vulgaris]
c29051.graph_c1	--	--	--	--	--	--	--	--	PREDICTED: uncharacterized protein LOC104892044 [Beta vulgaris subsp. vulgaris]
c36606.graph_c0	--	--	--	--	[R]	General function prediction only	PPR repeat family;; PPR repeat;; Pentatricopeptide repeat domain;; PPR repeat;; DYW family of nucleic acid deaminases	Pentatricopeptide repeat-containing protein At2g41080 GN=PCMP-H29 OS=Arabidopsis thaliana (Mouse-ear cress) PE=2 SV=2	PREDICTED: pentatricopeptide repeat-containing protein At2g41080 [Beta vulgaris subsp. vulgaris]
c32807.graph_c0	[O]	Posttranslational modification, protein turnover, chaperones	Molecular Function: nucleotide binding (GO:0000166);; Molecular Function: nucleoside-triphosphatase activity (GO:0017111);; Biological Process: cellular metabolic process (GO:0044237);; Biological Process: organic substance metabolic process (GO:0071704);;	--	[O]	Posttranslational modification, protein turnover, chaperones	ATPase family associated with various cellular activities (AAA);; Domain associated at C-terminal with AAA	26S protease regulatory subunit 6B homolog OS=Solanum tuberosum (Potato) PE=1 SV=1	PREDICTED: probable mitochondrial chaperone BCS1-A [Beta vulgaris subsp. vulgaris]
c34601.graph_c0	[RTKL]	--	Molecular Function: binding (GO:0005488);; Molecular Function: transferase activity, transferring phosphorus-containing groups (GO:0016772);;	--	--	--	Protein tyrosine kinase;; Protein kinase domain	Wall-associated receptor kinase-like 2 (Precursor) GN=WAKL2 OS=Arabidopsis thaliana (Mouse-ear cress) PE=2 SV=1	PREDICTED: wall-associated receptor kinase-like 22 isoform X2 [Beta vulgaris subsp. vulgaris]
c43316.graph_c0	--	--	--	--	--	--	AWPM-19-like family	--	PREDICTED: uncharacterized protein LOC104901978 [Beta vulgaris subsp. vulgaris]
c43101.graph_c0	--	--	--	--	--	--	--	--	PREDICTED: FIP1[V]-like protein [Beta vulgaris subsp. vulgaris]
c39699.graph_c0	--	--	--	--	--	--	--	--	PREDICTED: uncharacterized protein LOC104906400 [Beta vulgaris subsp. vulgaris]
c45805.graph_c0	--	--	--	--	[Q]	Secondary metabolites biosynthesis, transport and catabolism	Cytochrome P450	Cytochrome P450 82A3 GN=CYP82A3 OS=Glycine max (Soybean) PE=2 SV=1	PREDICTED: cytochrome P450 CYP82D47-like [Beta vulgaris subsp. vulgaris]
c11299.graph_c0	[J]	Translation, ribosomal structure and biogenesis	Molecular Function: tRNA binding (GO:0000049);; Molecular Function: alanine-tRNA ligase activity (GO:0004813);; Molecular Function: ATP binding (GO:0005524);; Cellular Component: mitochondrion (GO:0005739);; Biological Process: alanyl-tRNA aminoacylation (GO:0006419);; Molecular Function: zinc ion binding (GO:0008270);; Cellular Component: chloroplast stroma (GO:0009570);; Biological Process: emb…	K01872|0.0|vvi:100255425|hypothetical protein LOC100255425	[J]	Translation, ribosomal structure and biogenesis	tRNA synthetases class II (A);; Threonyl and Alanyl tRNA synthetase second additional domain;; DHHA1 domain	Probable alanine--tRNA ligase, chloroplastic {ECO:0000255|HAMAP-Rule:MF_03134} GN=POPTRDRAFT_821063 OS=Populus trichocarpa (Western balsam poplar) PE=3 SV=1	PREDICTED: probable alanine--tRNA ligase, chloroplastic isoform X1 [Beta vulgaris subsp. vulgaris]
c24309.graph_c0	--	--	--	--	--	--	Phosphate-induced protein 1 conserved region	Protein EXORDIUM (Precursor) GN=EXO OS=Arabidopsis thaliana (Mouse-ear cress) PE=2 SV=1	PREDICTED: protein EXORDIUM-like [Beta vulgaris subsp. vulgaris]
c16912.graph_c1	--	--	--	--	--	--	--	--	PREDICTED: uncharacterized protein LOC104112275, partial [Nicotiana tomentosiformis]
c32863.graph_c1	--	--	--	--	--	--	--	Zinc finger protein JAGGED GN=JAG OS=Arabidopsis thaliana (Mouse-ear cress) PE=2 SV=1	PREDICTED: zinc finger protein JAGGED-like [Beta vulgaris subsp. vulgaris]
c41793.graph_c0	--	--	--	--	[Y]	Nuclear structure	SRP40, C-terminal domain	H/ACA ribonucleoprotein complex subunit 4 GN=F24I3.230 OS=Arabidopsis thaliana (Mouse-ear cress) PE=1 SV=1	PREDICTED: nucleolar and coiled-body phosphoprotein 1 [Beta vulgaris subsp. vulgaris]
c28685.graph_c0	--	--	Cellular Component: cytoplasm (GO:0005737);; Biological Process: petal development (GO:0048441);; Biological Process: stamen development (GO:0048443);; Biological Process: ovule development (GO:0048481);;	--	[J]	Translation, ribosomal structure and biogenesis	Piwi domain	Protein argonaute 5 GN=AGO5 OS=Arabidopsis thaliana (Mouse-ear cress) PE=1 SV=2	PREDICTED: protein argonaute 5 [Beta vulgaris subsp. vulgaris]
c76867.graph_c0	[Q]	Secondary metabolites biosynthesis, transport and catabolism	--	--	--	--	--	--	hypothetical protein SMAC_11495 [Sordaria macrospora k-hell]
c15642.graph_c0	[J]	Translation, ribosomal structure and biogenesis	Molecular Function: RNA binding (GO:0003723);; Molecular Function: structural constituent of ribosome (GO:0003735);; Cellular Component: nucleolus (GO:0005730);; Cellular Component: vacuole (GO:0005773);; Cellular Component: plasma membrane (GO:0005886);; Biological Process: translation (GO:0006412);; Cellular Component: chloroplast (GO:0009507);; Biological Process: response to salt stress (GO:0…	K02985|1e-134|zma:100382757|hypothetical protein LOC100382757	[J]	Translation, ribosomal structure and biogenesis	Ribosomal protein S3, C-terminal domain	40S ribosomal protein S3-1 GN=RPS3A OS=Arabidopsis thaliana (Mouse-ear cress) PE=1 SV=1	PREDICTED: 40S ribosomal protein S3-3-like isoform 2 [Fragaria vesca subsp. vesca]
c32280.graph_c0	--	--	Molecular Function: organic cyclic compound binding (GO:0097159);; Molecular Function: heterocyclic compound binding (GO:1901363);;	K14314|0.0|vvi:100257580|hypothetical protein LOC100257580	[YU]	--	Bacterial Ig-like domain (group 2)	Nuclear pore complex protein GP210 {ECO:0000303|PubMed:21189294} (Precursor) OS=Arabidopsis thaliana (Mouse-ear cress) PE=1 SV=1	PREDICTED: nuclear pore complex protein GP210 isoform X2 [Beta vulgaris subsp. vulgaris]
c41293.graph_c0	[C]	Energy production and conversion	Molecular Function: dihydrolipoyllysine-residue succinyltransferase activity (GO:0004149);; Cellular Component: mitochondrion (GO:0005739);; Biological Process: tricarboxylic acid cycle (GO:0006099);; Biological Process: response to oxidative stress (GO:0006979);; Molecular Function: zinc ion binding (GO:0008270);; Cellular Component: membrane (GO:0016020);; Cellular Component: cytosolic ribosome…	K00658|0.0|pop:POPTR_727965|hypothetical protein	[C]	Energy production and conversion	2-oxoacid dehydrogenases acyltransferase (catalytic domain);; Biotin-requiring enzyme;; Biotin-lipoyl like	Dihydrolipoyllysine-residue succinyltransferase component of 2-oxoglutarate dehydrogenase complex 1, mitochondrial (Precursor) GN=At5g55070 OS=Arabidopsis thaliana (Mouse-ear cress) PE=2 SV=1	PREDICTED: dihydrolipoyllysine-residue succinyltransferase component of 2-oxoglutarate dehydrogenase complex 1, mitochondrial [Beta vulgaris subsp. vulgaris]
c37871.graph_c0	[RTKL]	--	Molecular Function: nucleotide binding (GO:0000166);; Molecular Function: protein kinase activity (GO:0004672);; Cellular Component: membrane (GO:0016020);; Biological Process: phosphorylation (GO:0016310);; Biological Process: cell wall organization (GO:0071555);;	--	--	--	Leucine Rich repeats (2 copies);; Leucine Rich Repeat;; Leucine rich repeat;; Protein kinase domain;; Protein tyrosine kinase;; Leucine Rich repeat;; Leucine rich repeat;; Leucine rich repeat N-terminal domain	Probable inactive receptor kinase At5g10020 (Precursor) GN=At5g10020 OS=Arabidopsis thaliana (Mouse-ear cress) PE=1 SV=2	PREDICTED: probable inactive receptor kinase At5g10020 [Beta vulgaris subsp. vulgaris]
c25032.graph_c0	--	--	Molecular Function: nucleic acid binding (GO:0003676);;	--	--	--	--	--	RNA-directed DNA polymerase ; HMG-I and HMG-Y, DNA-binding, putative [Medicago truncatula]
c17103.graph_c0	--	--	--	--	[R]	General function prediction only	PPR repeat;; PPR repeat family;; PPR repeat;; Pentatricopeptide repeat domain	Pentatricopeptide repeat-containing protein At2g13600 GN=PCMP-E76 OS=Arabidopsis thaliana (Mouse-ear cress) PE=3 SV=1	PREDICTED: pentatricopeptide repeat-containing protein At2g22410, mitochondrial-like [Beta vulgaris subsp. vulgaris]
c79068.graph_c0	--	--	Molecular Function: binding (GO:0005488);;	--	[R]	General function prediction only	Domain of unknown function (DUF4219)	--	hypothetical protein glysoja_048208, partial [Glycine soja]
c11501.graph_c0	--	--	Cellular Component: integral component of membrane (GO:0016021);; Molecular Function: transferase activity, transferring hexosyl groups (GO:0016758);; Molecular Function: xyloglucan 6-xylosyltransferase activity (GO:0033843);;	K08238|0.0|vvi:100232895|X34.1	[GM]	--	galactosyl transferase GMA12/MNN10 family	Xyloglucan 6-xylosyltransferase 2 OS=Arabidopsis thaliana (Mouse-ear cress) PE=1 SV=1	PREDICTED: xyloglucan 6-xylosyltransferase 2 [Beta vulgaris subsp. vulgaris]
c31579.graph_c0	--	--	--	--	--	--	Heavy-metal-associated domain	Copper transport protein CCH GN=CCH OS=Arabidopsis thaliana (Mouse-ear cress) PE=1 SV=1	PREDICTED: uncharacterized protein LOC104906638 isoform X2 [Beta vulgaris subsp. vulgaris]
c11765.graph_c0	--	--	Molecular Function: protein serine/threonine kinase activity (GO:0004674);; Molecular Function: ATP binding (GO:0005524);; Biological Process: protein phosphorylation (GO:0006468);; Cellular Component: integral component of membrane (GO:0016021);;	--	--	--	Protein tyrosine kinase;; Protein kinase domain	LRR receptor-like serine/threonine-protein kinase FEI 2 (Precursor) GN=FEI2 OS=Arabidopsis thaliana (Mouse-ear cress) PE=1 SV=1	hypothetical protein VITISV_021805 [Vitis vinifera]
c41733.graph_c0	[J]	Translation, ribosomal structure and biogenesis	Biological Process: RNA methylation (GO:0001510);; Molecular Function: structural constituent of ribosome (GO:0003735);; Cellular Component: nucleolus (GO:0005730);; Cellular Component: plasma membrane (GO:0005886);; Biological Process: translation (GO:0006412);; Cellular Component: plasmodesma (GO:0009506);; Cellular Component: cytosolic small ribosomal subunit (GO:0022627);; Biological Process:…	K02978|2e-24|ath:AT2G45710|40S ribosomal protein S27 (RPS27A)	[J]	Translation, ribosomal structure and biogenesis	--	40S ribosomal protein S27-1 OS=Arabidopsis thaliana (Mouse-ear cress) PE=3 SV=1	hypothetical protein CARUB_v10018269mg, partial [Capsella rubella]
c64074.graph_c0	[R]	General function prediction only	--	--	--	--	--	--	--
c11658.graph_c0	[G]	Carbohydrate transport and metabolism	Molecular Function: ribokinase activity (GO:0004747);; Biological Process: D-ribose metabolic process (GO:0006014);; Cellular Component: chloroplast stroma (GO:0009570);; Biological Process: phosphorylation (GO:0016310);;	K00852|0.0|vvi:100265800|hypothetical protein LOC100265800	[G]	Carbohydrate transport and metabolism	pfkB family carbohydrate kinase;; Phosphomethylpyrimidine kinase;; Carbohydrate kinase	Probable fructokinase-6, chloroplastic (Precursor) OS=Arabidopsis thaliana (Mouse-ear cress) PE=2 SV=1	PREDICTED: ribokinase [Beta vulgaris subsp. vulgaris]
c34098.graph_c0	--	--	--	--	--	--	--	50S ribosomal protein 6, chloroplastic (Precursor) GN=PSRP6 OS=Spinacia oleracea (Spinach) PE=1 SV=1	PREDICTED: 50S ribosomal protein 6, chloroplastic [Beta vulgaris subsp. vulgaris]
c47927.graph_c0	[G]	Carbohydrate transport and metabolism	Molecular Function: hydrolase activity, hydrolyzing O-glycosyl compounds (GO:0004553);; Biological Process: carbohydrate metabolic process (GO:0005975);; Molecular Function: protein binding, bridging (GO:0030674);; Molecular Function: actin filament binding (GO:0051015);;	--	--	--	--	--	PREDICTED: probable glucan 1,3-beta-glucosidase A [Beta vulgaris subsp. vulgaris]
c30673.graph_c0	[O]	Posttranslational modification, protein turnover, chaperones	Molecular Function: transferase activity (GO:0016740);;	K00685|0.0|vvi:100253633|hypothetical protein LOC100253633	[O]	Posttranslational modification, protein turnover, chaperones	Arginine-tRNA-protein transferase, C terminus;; Arginine-tRNA-protein transferase, N terminus	Arginyl-tRNA--protein transferase 1 GN=ATE1 OS=Arabidopsis thaliana (Mouse-ear cress) PE=2 SV=2	PREDICTED: arginyl-tRNA--protein transferase 1 [Beta vulgaris subsp. vulgaris]
c18483.graph_c0	--	--	Biological Process: metabolic process (GO:0008152);; Cellular Component: plastid (GO:0009536);;	K00422|2e-26|vvi:100233086|PPO	--	--	Protein of unknown function (DUF_B2219)	Polyphenol oxidase, chloroplastic (Precursor) OS=Spinacia oleracea (Spinach) PE=2 SV=1	PREDICTED: polyphenol oxidase, chloroplastic-like [Beta vulgaris subsp. vulgaris]
c11953.graph_c0	[S]	Function unknown	Cellular Component: chloroplast envelope (GO:0009941);;	--	--	--	YGGT family	Uncharacterized protein ycf19 GN=ycf19 OS=Guillardia theta (Cryptomonas phi) PE=3 SV=1	PREDICTED: uncharacterized protein LOC104889701 [Beta vulgaris subsp. vulgaris]
c50965.graph_c0	--	--	--	--	[R]	General function prediction only	Reverse transcriptase (RNA-dependent DNA polymerase)	Uncharacterized mitochondrial protein AtMg01250 GN=AtMg01250 OS=Arabidopsis thaliana (Mouse-ear cress) PE=4 SV=1	hypothetical protein [Beta vulgaris subsp. vulgaris]
c18880.graph_c0	--	--	--	K14499|2e-72|vvi:100243702|hypothetical protein LOC100243702	--	--	--	BRI1 kinase inhibitor 1 GN=BKI1 OS=Arabidopsis thaliana (Mouse-ear cress) PE=1 SV=1	PREDICTED: BRI1 kinase inhibitor 1 [Beta vulgaris subsp. vulgaris]
c35136.graph_c0	--	--	Biological Process: protein glycosylation (GO:0006486);; Molecular Function: fucosyltransferase activity (GO:0008417);; Biological Process: Lewis a epitope biosynthetic process (GO:0010493);; Cellular Component: integral component of membrane (GO:0016021);; Cellular Component: Golgi cisterna membrane (GO:0032580);; Biological Process: fucosylation (GO:0036065);;	K14412|0.0|pop:POPTR_809657|hypothetical protein	[GE]	--	Glycosyltransferase family 10 (fucosyltransferase)	Alpha-(1,4)-fucosyltransferase GN=FUT13 OS=Arabidopsis thaliana (Mouse-ear cress) PE=2 SV=2	PREDICTED: alpha-(1,4)-fucosyltransferase [Beta vulgaris subsp. vulgaris]
c77151.graph_c0	[C]	Energy production and conversion	--	--	--	--	Cytochrome C oxidase subunit II, transmembrane domain	Cytochrome c oxidase subunit 2 GN=COX2 OS=Cyanidium caldarium PE=3 SV=1	cytochrome c oxidase subunit 2 [Chrysodidymus synuroideus]
c18197.graph_c0	[E]	Amino acid transport and metabolism	Molecular Function: L-aspartate:2-oxoglutarate aminotransferase activity (GO:0004069);; Biological Process: cellular amino acid metabolic process (GO:0006520);; Biological Process: response to cold (GO:0009409);; Cellular Component: chloroplast stroma (GO:0009570);; Biological Process: ethylene biosynthetic process (GO:0009693);; Cellular Component: chloroplast envelope (GO:0009941);; Cellular Co…	K00813|0.0|vvi:100242364|hypothetical protein LOC100242364	[E]	Amino acid transport and metabolism	Aminotransferase class I and II	Aspartate aminotransferase, chloroplastic (Precursor) GN=F10N7.200 OS=Arabidopsis thaliana (Mouse-ear cress) PE=1 SV=2	PREDICTED: aspartate aminotransferase, chloroplastic [Beta vulgaris subsp. vulgaris]
c30738.graph_c0	[L]	Replication, recombination and repair	Molecular Function: RNA binding (GO:0003723);; Molecular Function: RNA-directed DNA polymerase activity (GO:0003964);; Molecular Function: aspartic-type endopeptidase activity (GO:0004190);; Biological Process: RNA-dependent DNA replication (GO:0006278);; Biological Process: proteolysis (GO:0006508);; Molecular Function: zinc ion binding (GO:0008270);; Biological Process: DNA integration (GO:0015…	--	[R]	General function prediction only	--	--	hypothetical protein [Beta vulgaris]
c43530.graph_c0	--	--	--	--	--	--	Late embryogenesis abundant protein	Protein YLS9 GN=F11F19.11 OS=Arabidopsis thaliana (Mouse-ear cress) PE=2 SV=1	PREDICTED: protein YLS9-like [Beta vulgaris subsp. vulgaris]
c11233.graph_c0	--	--	Cellular Component: chloroplast (GO:0009507);; Biological Process: photosynthesis, light harvesting (GO:0009765);; Cellular Component: membrane (GO:0016020);; Molecular Function: metal ion binding (GO:0046872);;	K08915|1e-176|rcu:RCOM_0644360|chlorophyll A/B binding protein, putative	--	--	Chlorophyll A-B binding protein	Chlorophyll a-b binding protein CP29.2, chloroplastic (Precursor) GN=LHCB4.2 OS=Arabidopsis thaliana (Mouse-ear cress) PE=1 SV=1	PREDICTED: chlorophyll a-b binding protein CP29.1, chloroplastic-like [Beta vulgaris subsp. vulgaris]
c29118.graph_c0	--	--	--	--	--	--	Thaumatin family	Pathogenesis-related protein 5 (Precursor) GN=At1g75040 OS=Arabidopsis thaliana (Mouse-ear cress) PE=1 SV=1	PREDICTED: thaumatin-like protein [Beta vulgaris subsp. vulgaris]
c15486.graph_c0	--	--	--	--	--	--	--	--	PREDICTED: loricrin-like [Malus domestica]
c52378.graph_c0	--	--	--	--	--	--	F-box associated;; F-box associated domain	F-box/kelch-repeat protein At3g06240 GN=At3g06240 OS=Arabidopsis thaliana (Mouse-ear cress) PE=2 SV=1	PREDICTED: F-box/kelch-repeat protein At3g06240-like [Beta vulgaris subsp. vulgaris]
c41835.graph_c0	--	--	Biological Process: generation of precursor metabolites and energy (GO:0006091);; Cellular Component: intracellular membrane-bounded organelle (GO:0043231);; Cellular Component: cytoplasmic part (GO:0044444);;	--	--	--	--	--	PREDICTED: uncharacterized protein LOC104891836 [Beta vulgaris subsp. vulgaris]
c28722.graph_c0	--	--	--	--	[R]	General function prediction only	--	--	PREDICTED: uncharacterized protein LOC104899277 [Beta vulgaris subsp. vulgaris]
c39872.graph_c0	--	--	--	--	--	--	GDP-fucose protein O-fucosyltransferase;; GDP-fucose protein O-fucosyltransferase	Uncharacterized protein At1g04910 GN=At1g04910 OS=Arabidopsis thaliana (Mouse-ear cress) PE=2 SV=1	PREDICTED: uncharacterized protein At1g04910 [Beta vulgaris subsp. vulgaris]
c11517.graph_c0	[J]	Translation, ribosomal structure and biogenesis	Molecular Function: structural constituent of ribosome (GO:0003735);; Biological Process: translation (GO:0006412);; Cellular Component: cytosolic large ribosomal subunit (GO:0022625);; Biological Process: ribosome biogenesis (GO:0042254);;	--	[J]	Translation, ribosomal structure and biogenesis	Ribosomal L29 protein	60S ribosomal protein L35-2 GN=RPL35B OS=Arabidopsis thaliana (Mouse-ear cress) PE=2 SV=1	PREDICTED: 60S ribosomal protein L35-like [Fragaria vesca subsp. vesca]
c35732.graph_c0	--	--	--	--	--	--	--	--	PREDICTED: uncharacterized protein LOC104897361 isoform X1 [Beta vulgaris subsp. vulgaris]
c26724.graph_c0	[O]	Posttranslational modification, protein turnover, chaperones	Molecular Function: transferase activity (GO:0016740);; Molecular Function: lyase activity (GO:0016829);;	--	[O]	Posttranslational modification, protein turnover, chaperones	Glutathione S-transferase, C-terminal domain;; Glutathione S-transferase, C-terminal domain	Probable glutathione S-transferase OS=Nicotiana tabacum (Common tobacco) PE=2 SV=1	PREDICTED: probable glutathione S-transferase parC [Beta vulgaris subsp. vulgaris]
c30533.graph_c0	--	--	Cellular Component: mitochondrial inner membrane (GO:0005743);; Biological Process: glycolysis (GO:0006096);; Biological Process: protein targeting to vacuole (GO:0006623);; Biological Process: mitochondrial pyruvate transport (GO:0006850);; Biological Process: aerobic respiration (GO:0009060);; Biological Process: response to cadmium ion (GO:0046686);;	--	[S]	Function unknown	Uncharacterised protein family (UPF0041)	Mitochondrial pyruvate carrier 4 {ECO:0000305} OS=Arabidopsis thaliana (Mouse-ear cress) PE=3 SV=1	PREDICTED: mitochondrial pyruvate carrier 2 [Beta vulgaris subsp. vulgaris]
c25732.graph_c0	--	--	--	--	[O]	Posttranslational modification, protein turnover, chaperones	--	--	PREDICTED: probable mitochondrial chaperone BCS1-B [Beta vulgaris subsp. vulgaris]
c36158.graph_c0	[DR]	--	Biological Process: mitotic cell cycle (GO:0000278);; Biological Process: double-strand break repair via homologous recombination (GO:0000724);; Biological Process: DNA-dependent DNA replication (GO:0006261);; Biological Process: regulation of DNA replication (GO:0006275);; Biological Process: DNA methylation (GO:0006306);; Biological Process: mitotic recombination (GO:0006312);; Biological Proce…	--	[DR]	--	Mnd1 family	Meiotic nuclear division protein 1 homolog GN=MND1 OS=Arabidopsis thaliana (Mouse-ear cress) PE=1 SV=1	PREDICTED: meiotic nuclear division protein 1 homolog [Beta vulgaris subsp. vulgaris]
c29059.graph_c0	--	--	--	--	--	--	Polysaccharide biosynthesis	Protein IRX15-LIKE GN=IRX15-L OS=Arabidopsis thaliana (Mouse-ear cress) PE=2 SV=1	PREDICTED: protein IRX15-LIKE-like [Beta vulgaris subsp. vulgaris]
c17274.graph_c0	[J]	Translation, ribosomal structure and biogenesis	Molecular Function: translation initiation factor activity (GO:0003743);; Biological Process: translational initiation (GO:0006413);;	K03239|0.0|rcu:RCOM_0417980|translation initiation factor eif-2b alpha subunit, putative	[J]	Translation, ribosomal structure and biogenesis	Initiation factor 2 subunit family	Methylthioribose-1-phosphate isomerase {ECO:0000255|HAMAP-Rule:MF_03119} GN=CIG2 OS=Nicotiana tabacum (Common tobacco) PE=2 SV=1	PREDICTED: uncharacterized protein LOC104900389 [Beta vulgaris subsp. vulgaris]
c24785.graph_c0	[R]	General function prediction only	Molecular Function: hydrolase activity (GO:0016787);;	--	--	--	HAD superfamily, subfamily IIIB (Acid phosphatase)	Acid phosphatase 1 (Precursor) GN=APS1 OS=Solanum lycopersicum (Tomato) PE=2 SV=1	PREDICTED: acid phosphatase 1 [Beta vulgaris subsp. vulgaris]
c35850.graph_c0	--	--	--	--	[O]	Posttranslational modification, protein turnover, chaperones	Glutaredoxin	Uncharacterized protein At3g28850 GN=At3g28850 OS=Arabidopsis thaliana (Mouse-ear cress) PE=3 SV=1	PREDICTED: uncharacterized protein At5g39865 [Beta vulgaris subsp. vulgaris]
c41230.graph_c0	--	--	Molecular Function: cysteine-type endopeptidase activity (GO:0004197);; Cellular Component: plasma membrane (GO:0005886);; Biological Process: proteolysis (GO:0006508);; Biological Process: apoptotic process (GO:0006917);; Cellular Component: chloroplast (GO:0009507);; Biological Process: response to UV-C (GO:0010225);; Biological Process: hydrogen peroxide-mediated programmed cell death (GO:0010…	--	[DO]	--	Caspase domain	Metacaspase-4 subunit p10 GN=YUP8H12R.4 OS=Arabidopsis thaliana (Mouse-ear cress) PE=1 SV=1	PREDICTED: metacaspase-5-like [Beta vulgaris subsp. vulgaris]
c77810.graph_c0	--	--	Molecular Function: nucleic acid binding (GO:0003676);; Molecular Function: zinc ion binding (GO:0008270);; Biological Process: DNA integration (GO:0015074);;	--	[R]	General function prediction only	--	Endonuclease OS=Nicotiana tabacum (Common tobacco) PE=2 SV=1	PREDICTED: uncharacterized protein LOC104891530 [Beta vulgaris subsp. vulgaris]
c26535.graph_c0	--	--	--	--	--	--	--	--	PREDICTED: uncharacterized protein LOC104889107 [Beta vulgaris subsp. vulgaris]
c1164.graph_c0	[L]	Replication, recombination and repair	Molecular Function: nucleic acid binding (GO:0003676);; Molecular Function: catalytic activity (GO:0003824);; Biological Process: DNA integration (GO:0015074);;	--	[R]	General function prediction only	--	--	PREDICTED: uncharacterized protein LOC104807088 [Tarenaya hassleriana]
c34449.graph_c0	--	--	--	--	--	--	Domain of unknown function (DUF4378)	--	PREDICTED: probable serine/threonine-protein kinase nek3 [Beta vulgaris subsp. vulgaris]
c42859.graph_c0	[C]	Energy production and conversion	Molecular Function: succinate-semialdehyde dehydrogenase [NAD(P)+] activity (GO:0009013);; Biological Process: gamma-aminobutyric acid catabolic process (GO:0009450);; Biological Process: oxidation-reduction process (GO:0055114);;	K00135|0.0|vvi:100262240|hypothetical protein LOC100262240	[C]	Energy production and conversion	Aldehyde dehydrogenase family	Succinate-semialdehyde dehydrogenase, mitochondrial (Precursor) GN=T8K14.14 OS=Arabidopsis thaliana (Mouse-ear cress) PE=1 SV=2	PREDICTED: succinate-semialdehyde dehydrogenase, mitochondrial [Beta vulgaris subsp. vulgaris]
c30709.graph_c0	--	--	--	--	--	--	GDSL-like Lipase/Acylhydrolase;; GDSL-like Lipase/Acylhydrolase	GDSL esterase/lipase At4g01130 (Precursor) GN=At4g01130 OS=Arabidopsis thaliana (Mouse-ear cress) PE=2 SV=1	PREDICTED: GDSL esterase/lipase At4g01130 [Beta vulgaris subsp. vulgaris]
c57332.graph_c0	--	--	--	--	--	--	MULE transposase domain;; Transposase, Mutator family	--	PREDICTED: uncharacterized protein LOC104903200 [Beta vulgaris subsp. vulgaris]
c55988.graph_c0	--	--	--	--	--	--	Wall-associated kinase	--	PREDICTED: wall-associated receptor kinase-like 2 isoform X2 [Beta vulgaris subsp. vulgaris]
c34772.graph_c0	--	--	Cellular Component: extracellular region (GO:0005576);; Molecular Function: metal ion binding (GO:0046872);;	--	--	--	Cupin;; Cupin domain;; AraC-like ligand binding domain	Germin-like protein 11-1 (Precursor) OS=Oryza sativa subsp. japonica (Rice) PE=2 SV=1	PREDICTED: germin-like protein subfamily 3 member 4 [Beta vulgaris subsp. vulgaris]
c38250.graph_c0	[GC]	--	Cellular Component: vacuole (GO:0005773);; Cellular Component: plasma membrane (GO:0005886);; Biological Process: flavonoid biosynthetic process (GO:0009813);; Biological Process: seed germination (GO:0009845);; Molecular Function: sterol 3-beta-glucosyltransferase activity (GO:0016906);; Biological Process: lipid glycosylation (GO:0030259);;	K05841|0.0|vvi:100250270|hypothetical protein LOC100250270	[GC]	--	Glycosyltransferase family 28 N-terminal domain	Sterol 3-beta-glucosyltransferase UGT80B1 GN=T10P12.7 OS=Arabidopsis thaliana (Mouse-ear cress) PE=2 SV=1	PREDICTED: sterol 3-beta-glucosyltransferase UGT80B1 isoform X2 [Beta vulgaris subsp. vulgaris]
c3566.graph_c0	--	--	--	--	--	--	--	--	PREDICTED: uncharacterized protein LOC104887324 [Beta vulgaris subsp. vulgaris]
c39347.graph_c0	--	--	--	--	[S]	Function unknown	Uncharacterized conserved protein	--	PREDICTED: kxDL motif-containing protein 1 [Beta vulgaris subsp. vulgaris]
c18067.graph_c1	[J]	Translation, ribosomal structure and biogenesis	Molecular Function: translation initiation factor activity (GO:0003743);; Molecular Function: translation elongation factor activity (GO:0003746);; Biological Process: translational initiation (GO:0006413);; Biological Process: translational frameshifting (GO:0006452);; Biological Process: peptidyl-lysine modification to hypusine (GO:0008612);; Molecular Function: ribosome binding (GO:0043022);; …	K03263|1e-81|osa:4334177|Os03g0758800	[J]	Translation, ribosomal structure and biogenesis	Eukaryotic elongation factor 5A hypusine, DNA-binding OB fold	Eukaryotic translation initiation factor 5A-1 OS=Medicago sativa (Alfalfa) PE=2 SV=1	PREDICTED: eukaryotic translation initiation factor 5A-2-like [Cicer arietinum]
c42371.graph_c0	[V]	Defense mechanisms	Molecular Function: transmembrane transporter activity (GO:0022857);; Biological Process: transmembrane transport (GO:0055085);;	--	[R]	General function prediction only	--	MATE efflux family protein LAL5 GN=MDB19.3 OS=Arabidopsis thaliana (Mouse-ear cress) PE=2 SV=1	PREDICTED: MATE efflux family protein LAL5-like [Beta vulgaris subsp. vulgaris]
c21021.graph_c0	--	--	--	--	--	--	--	--	PREDICTED: uncharacterized protein LOC104894304 isoform X1 [Beta vulgaris subsp. vulgaris]
c28226.graph_c0	[G]	Carbohydrate transport and metabolism	Molecular Function: hydrolase activity (GO:0016787);;	K01188|1e-129|sbi:SORBI_06g019840|hypothetical protein	[G]	Carbohydrate transport and metabolism	Glycosyl hydrolase family 1;; GDP-fucose protein O-fucosyltransferase	Furostanol glycoside 26-O-beta-glucosidase {ECO:0000303|PubMed:8766714} (Precursor) OS=Cheilocostus speciosus (Crepe ginger) PE=1 SV=1	PREDICTED: beta-glucosidase 13-like [Beta vulgaris subsp. vulgaris]
c25293.graph_c0	[C]	Energy production and conversion	Biological Process: tricarboxylic acid cycle (GO:0006099);; Biological Process: malate metabolic process (GO:0006108);; Molecular Function: L-malate dehydrogenase activity (GO:0030060);; Biological Process: cellular carbohydrate metabolic process (GO:0044262);;	K00025|1e-154|rcu:RCOM_1609380|malate dehydrogenase, putative (EC:1.1.1.37)	[C]	Energy production and conversion	lactate/malate dehydrogenase, NAD binding domain;; lactate/malate dehydrogenase, alpha/beta C-terminal domain	Malate dehydrogenase, cytoplasmic OS=Zea mays (Maize) PE=1 SV=2	PREDICTED: malate dehydrogenase, cytoplasmic-like isoform X1 [Beta vulgaris subsp. vulgaris]
c14529.graph_c0	--	--	--	--	[R]	General function prediction only	Ankyrin repeats (3 copies);; Domain of unknown function;; Ankyrin repeats (many copies);; Ankyrin repeat;; Ankyrin repeat;; Ankyrin repeats (many copies)	Ankyrin repeat-containing protein At3g12360 GN=At3g12360 OS=Arabidopsis thaliana (Mouse-ear cress) PE=2 SV=1	PREDICTED: uncharacterized protein LOC104895013 [Beta vulgaris subsp. vulgaris]
c22932.graph_c0	--	--	Molecular Function: oxidoreductase activity, acting on single donors with incorporation of molecular oxygen, incorporation of two atoms of oxygen (GO:0016702);;	K11159|1e-25|rcu:RCOM_0968760|9-cis-epoxycarotenoid dioxygenase, putative	[Q]	Secondary metabolites biosynthesis, transport and catabolism	Retinal pigment epithelial membrane protein	Carotenoid 9,10(9&apos;,10&apos;)-cleavage dioxygenase 1 GN=CCD1 OS=Oncidium hybrid cultivar (Orchid) PE=2 SV=1	PREDICTED: carotenoid 9,10(9&apos;,10&apos;)-cleavage dioxygenase 1 [Beta vulgaris subsp. vulgaris]
c70473.graph_c0	--	--	--	--	--	--	--	--	PREDICTED: F-box/FBD/LRR-repeat protein At1g13570-like [Beta vulgaris subsp. vulgaris]
c32737.graph_c0	[RTKL]	--	Biological Process: MAPK cascade (GO:0000165);; Molecular Function: MAP kinase activity (GO:0004707);; Molecular Function: ATP binding (GO:0005524);; Cellular Component: vacuole (GO:0005773);; Cellular Component: plasma membrane (GO:0005886);; Biological Process: protein phosphorylation (GO:0006468);;	--	[T]	Signal transduction mechanisms	Protein kinase domain;; Protein tyrosine kinase;; Lipopolysaccharide kinase (Kdo/WaaP) family	Mitogen-activated protein kinase 16 GN=MPK16 OS=Arabidopsis thaliana (Mouse-ear cress) PE=2 SV=2	hypothetical protein CISIN_1g0075411mg [Citrus sinensis]
c40322.graph_c0	--	--	--	--	[P]	Inorganic ion transport and metabolism	Protein of unknown function (DUF3820);; WLM domain;; Zn-finger in Ran binding protein and others;; WLM domain	--	PREDICTED: DNA-dependent metalloprotease WSS1-like [Beta vulgaris subsp. vulgaris]
c31639.graph_c0	[TZDR]	--	Molecular Function: calcium ion binding (GO:0005509);; Molecular Function: 2-alkenal reductase [NAD(P)] activity (GO:0032440);; Biological Process: oxidation-reduction process (GO:0055114);;	K13448|1e-81|rcu:RCOM_1464230|Calmodulin, putative (EC:1.3.1.74)	[T]	Signal transduction mechanisms	EF-hand domain pair;; EF hand;; EF-hand domain;; EF hand;; EF-hand domain pair;; Secreted protein acidic and rich in cysteine Ca binding region;; Cytoskeletal-regulatory complex EF hand	Probable calcium-binding protein CML15 GN=CML15 OS=Arabidopsis thaliana (Mouse-ear cress) PE=2 SV=1	PREDICTED: probable calcium-binding protein CML15 [Beta vulgaris subsp. vulgaris]
c39501.graph_c1	[GEPR]	--	Molecular Function: transporter activity (GO:0005215);; Cellular Component: plasma membrane (GO:0005886);; Cellular Component: integral component of membrane (GO:0016021);; Biological Process: transmembrane transport (GO:0055085);;	--	[R]	General function prediction only	--	--	PREDICTED: hippocampus abundant transcript 1 protein-like [Beta vulgaris subsp. vulgaris]
c38734.graph_c0	[L]	Replication, recombination and repair	--	--	--	--	--	Protein CHUP1, chloroplastic GN=CHUP1 OS=Arabidopsis thaliana (Mouse-ear cress) PE=1 SV=1	PREDICTED: protein CHUP1, chloroplastic [Beta vulgaris subsp. vulgaris]
c23481.graph_c0	--	--	--	--	--	--	--	--	PREDICTED: uncharacterized protein At4g26485-like [Beta vulgaris subsp. vulgaris]
c12632.graph_c0	--	--	--	--	--	--	--	Sulfated surface glycoprotein 185 (Precursor) OS=Volvox carteri (Green alga) PE=1 SV=1	PREDICTED: extensin-like [Vitis vinifera]
c28194.graph_c0	[T]	Signal transduction mechanisms	Molecular Function: protein serine/threonine phosphatase activity (GO:0004722);; Biological Process: protein dephosphorylation (GO:0006470);; Cellular Component: protein serine/threonine phosphatase complex (GO:0008287);; Molecular Function: metal ion binding (GO:0046872);; Biological Process: root hair elongation (GO:0048767);;	--	[T]	Signal transduction mechanisms	Protein phosphatase 2C;; Protein phosphatase 2C	Probable protein phosphatase 2C 76 GN=At5g53140 OS=Arabidopsis thaliana (Mouse-ear cress) PE=2 SV=1	PREDICTED: probable protein phosphatase 2C 76 [Beta vulgaris subsp. vulgaris]
c18248.graph_c0	[RTKL]	--	Molecular Function: nucleotide binding (GO:0000166);; Cellular Component: membrane (GO:0016020);; Molecular Function: kinase activity (GO:0016301);; Biological Process: phosphorylation (GO:0016310);; Molecular Function: oxidoreductase activity (GO:0016491);;	--	--	--	Protein kinase domain;; Protein tyrosine kinase	Probable LRR receptor-like serine/threonine-protein kinase At4g37250 (Precursor) GN=At4g37250 OS=Arabidopsis thaliana (Mouse-ear cress) PE=2 SV=1	PREDICTED: probable LRR receptor-like serine/threonine-protein kinase At4g37250 [Beta vulgaris subsp. vulgaris]
c37887.graph_c0	--	--	--	--	--	--	--	--	PDZ domain protein [Medicago truncatula]
c24590.graph_c0	[I]	Lipid transport and metabolism	Biological Process: transition metal ion transport (GO:0000041);; Molecular Function: CDP-diacylglycerol-inositol 3-phosphatidyltransferase activity (GO:0003881);; Cellular Component: endoplasmic reticulum (GO:0005783);; Cellular Component: Golgi apparatus (GO:0005794);; Cellular Component: plasma membrane (GO:0005886);; Biological Process: phosphatidylinositol biosynthetic process (GO:0006661);;…	K00999|1e-25|ath:AT4G38570|PIS2	[I]	Lipid transport and metabolism	--	Probable CDP-diacylglycerol--inositol 3-phosphatidyltransferase 2 GN=PIS2 OS=Arabidopsis thaliana (Mouse-ear cress) PE=2 SV=2	PREDICTED: CDP-diacylglycerol--inositol 3-phosphatidyltransferase 1-like [Beta vulgaris subsp. vulgaris]
c72891.graph_c0	--	--	--	--	[R]	General function prediction only	--	--	PREDICTED: uncharacterized protein LOC104896745 [Beta vulgaris subsp. vulgaris]
c10828.graph_c0	[V]	Defense mechanisms	Molecular Function: ATP binding (GO:0005524);; Biological Process: ATP catabolic process (GO:0006200);; Biological Process: transport (GO:0006810);; Cellular Component: integral component of membrane (GO:0016021);; Molecular Function: ATPase activity (GO:0016887);;	--	[Q]	Secondary metabolites biosynthesis, transport and catabolism	ABC transporter	Probable pleiotropic drug resistance protein 1 OS=Oryza sativa subsp. japonica (Rice) PE=3 SV=1	PREDICTED: pleiotropic drug resistance protein 2-like [Cucumis sativus]
c41427.graph_c0	--	--	Molecular Function: structural molecule activity (GO:0005198);; Cellular Component: vacuolar membrane (GO:0005774);; Cellular Component: cytosol (GO:0005829);; Cellular Component: plasma membrane (GO:0005886);; Biological Process: retrograde vesicle-mediated transport, Golgi to ER (GO:0006890);; Molecular Function: protein transporter activity (GO:0008565);; Biological Process: protein transport …	--	[U]	Intracellular trafficking, secretion, and vesicular transport	Coatomer epsilon subunit;; Tetratricopeptide repeat;; Tetratricopeptide repeat;; TPR repeat;; Tetratricopeptide repeat;; Tetratricopeptide repeat;; Tetratricopeptide repeat;; Tetratricopeptide repeat	Coatomer subunit epsilon-1 GN=At1g30630 OS=Arabidopsis thaliana (Mouse-ear cress) PE=2 SV=1	PREDICTED: coatomer subunit epsilon-1-like [Beta vulgaris subsp. vulgaris]
c36518.graph_c0	[RTKL]	--	Biological Process: cellular process (GO:0009987);; Molecular Function: kinase activity (GO:0016301);;	--	[T]	Signal transduction mechanisms	Protein kinase domain;; Protein tyrosine kinase;; NAF domain;; Kinase-like;; Lipopolysaccharide kinase (Kdo/WaaP) family;; Phosphotransferase enzyme family	CBL-interacting serine/threonine-protein kinase 7 GN=At3g23000 OS=Arabidopsis thaliana (Mouse-ear cress) PE=1 SV=1	PREDICTED: CBL-interacting serine/threonine-protein kinase 4-like [Beta vulgaris subsp. vulgaris]
c4400.graph_c0	--	--	--	--	--	--	--	--	PREDICTED: uncharacterized protein LOC104891950 [Beta vulgaris subsp. vulgaris]
c11174.graph_c0	--	--	Biological Process: response to cold (GO:0009409);; Cellular Component: chloroplast thylakoid membrane (GO:0009535);; Biological Process: anthocyanin-containing compound biosynthetic process (GO:0009718);; Biological Process: response to sucrose (GO:0009744);; Biological Process: positive regulation of seed germination (GO:0010030);; Biological Process: photoprotection (GO:0010117);; Biological P…	--	--	--	Chlorophyll A-B binding protein	Early light-induced protein 1, chloroplastic (Precursor) GN=ELIP1 OS=Arabidopsis thaliana (Mouse-ear cress) PE=1 SV=1	PREDICTED: early light-induced protein 2, chloroplastic-like [Beta vulgaris subsp. vulgaris]
c41937.graph_c0	--	--	Biological Process: transmembrane transport (GO:0055085);;	--	[T]	Signal transduction mechanisms	OPT oligopeptide transporter protein	Oligopeptide transporter 7 GN=OPT7 OS=Arabidopsis thaliana (Mouse-ear cress) PE=2 SV=1	PREDICTED: oligopeptide transporter 7-like [Beta vulgaris subsp. vulgaris]
c31694.graph_c0	--	--	--	--	[R]	General function prediction only	Putative methyltransferase	--	hypothetical protein JCGZ_23380 [Jatropha curcas]
c43524.graph_c0	--	--	--	--	--	--	--	--	PREDICTED: probable helicase DDB_G0274399 [Beta vulgaris subsp. vulgaris]
c17187.graph_c0	[R]	General function prediction only	Molecular Function: nucleotide binding (GO:0000166);; Molecular Function: nucleic acid binding (GO:0003676);;	K12741|0.0|vvi:100256017|hypothetical protein LOC100256017	[R]	General function prediction only	RNA recognition motif. (a.k.a. RRM, RBD, or RNP domain);; RNA recognition motif (a.k.a. RRM, RBD, or RNP domain);; RNA recognition motif. (a.k.a. RRM, RBD, or RNP domain)	Heterogeneous nuclear ribonucleoprotein 1 GN=RNP1 OS=Arabidopsis thaliana (Mouse-ear cress) PE=1 SV=1	hypothetical protein PRUPE_ppa007179mg [Prunus persica]
c28799.graph_c0	--	--	--	--	--	--	--	--	PREDICTED: uncharacterized protein LOC104902238 [Beta vulgaris subsp. vulgaris]
c46088.graph_c0	--	--	--	--	--	--	--	--	Uncharacterized protein TCM_037169 [Theobroma cacao]
c46509.graph_c0	[C]	Energy production and conversion	Molecular Function: succinate dehydrogenase activity (GO:0000104);; Cellular Component: mitochondrial respiratory chain complex II (GO:0005749);; Biological Process: mitochondrial electron transport, succinate to ubiquinone (GO:0006121);; Molecular Function: zinc ion binding (GO:0008270);; Molecular Function: electron carrier activity (GO:0009055);; Molecular Function: iron-sulfur cluster binding…	K00235|3e-23|ath:AT5G40650|SDH2-2	[C]	Energy production and conversion	2Fe-2S iron-sulfur cluster binding domain	Succinate dehydrogenase [ubiquinone] iron-sulfur subunit 2, mitochondrial (Precursor) OS=Arabidopsis thaliana (Mouse-ear cress) PE=1 SV=2	BnaA09g02000D [Brassica napus]
c48908.graph_c0	[R]	General function prediction only	--	--	[R]	General function prediction only	C2 domain	Probable ADP-ribosylation factor GTPase-activating protein AGD13 GN=AGD13 OS=Arabidopsis thaliana (Mouse-ear cress) PE=2 SV=1	PREDICTED: probable ADP-ribosylation factor GTPase-activating protein AGD13 [Beta vulgaris subsp. vulgaris]
c80859.graph_c0	[Z]	Cytoskeleton	Molecular Function: microtubule motor activity (GO:0003777);; Molecular Function: ATP binding (GO:0005524);; Molecular Function: phospholipid binding (GO:0005543);; Cellular Component: kinesin complex (GO:0005871);; Cellular Component: microtubule (GO:0005874);; Biological Process: microtubule-based movement (GO:0007018);; Molecular Function: microtubule binding (GO:0008017);;	--	[Z]	Cytoskeleton	Kinesin motor domain	Phragmoplast orienting kinesin 2 GN=POK2 OS=Arabidopsis thaliana (Mouse-ear cress) PE=2 SV=1	kinesin family member 1/13/14 [Mortierella verticillata NRRL 6337]
c27024.graph_c0	--	--	Molecular Function: binding (GO:0005488);;	--	[KB]	--	Methyl-CpG binding domain;; CW-type Zinc Finger	Methyl-CpG-binding domain-containing protein 4 GN=MBD4 OS=Arabidopsis thaliana (Mouse-ear cress) PE=2 SV=1	PREDICTED: methyl-CpG-binding domain-containing protein 4-like [Beta vulgaris subsp. vulgaris]
c20591.graph_c0	--	--	Cellular Component: vacuolar membrane (GO:0005774);; Cellular Component: endoplasmic reticulum (GO:0005783);; Biological Process: intracellular protein transport (GO:0006886);; Cellular Component: plasmodesma (GO:0009506);; Cellular Component: chloroplast (GO:0009507);; Cellular Component: integral component of membrane (GO:0016021);;	K14009|2e-90|vvi:100249972|hypothetical protein LOC100249972	[V]	Defense mechanisms	B-cell receptor-associated protein 31-like	--	PREDICTED: B-cell receptor-associated protein 31 [Beta vulgaris subsp. vulgaris]
c32613.graph_c0	--	--	Cellular Component: cytoplasm (GO:0005737);;	K02183|2e-10|osa:4326903|Os01g0279300	[T]	Signal transduction mechanisms	EF-hand domain pair;; EF hand	Calmodulin-3 OS=Oryza sativa subsp. japonica (Rice) PE=3 SV=1	PREDICTED: uncharacterized protein LOC104882859 [Beta vulgaris subsp. vulgaris]
c32240.graph_c0	[GER]	--	Biological Process: glucose catabolic process (GO:0006007);; Biological Process: transport (GO:0006810);; Cellular Component: integral component of membrane (GO:0016021);;	--	[S]	Function unknown	EamA-like transporter family;; Eukaryotic protein of unknown function (DUF914);; Triose-phosphate Transporter family;; Multidrug resistance efflux transporter;; UAA transporter family	--	PREDICTED: thiamine-repressible mitochondrial transport protein THI74-like [Beta vulgaris subsp. vulgaris]
c35704.graph_c0	--	--	--	--	[R]	General function prediction only	GAG-pre-integrase domain	Endonuclease OS=Nicotiana tabacum (Common tobacco) PE=2 SV=1	PREDICTED: uncharacterized protein LOC104889326 [Beta vulgaris subsp. vulgaris]
c9544.graph_c0	--	--	--	--	--	--	--	--	PREDICTED: uncharacterized protein LOC104904675 [Beta vulgaris subsp. vulgaris]
c53670.graph_c0	--	--	--	--	--	--	--	--	PREDICTED: uncharacterized protein LOC104899466 [Beta vulgaris subsp. vulgaris]
c20888.graph_c1	[L]	Replication, recombination and repair	--	--	[A]	RNA processing and modification	AAA domain	Probable helicase MAGATAMA 3 GN=MAA3 OS=Arabidopsis thaliana (Mouse-ear cress) PE=2 SV=1	PREDICTED: probable helicase MAGATAMA 3-like, partial [Solanum tuberosum]
c2963.graph_c0	--	--	--	--	[R]	General function prediction only	Reverse transcriptase-like	--	PREDICTED: uncharacterized protein LOC104886370, partial [Beta vulgaris subsp. vulgaris]
c12046.graph_c0	--	--	--	--	--	--	--	--	PREDICTED: uncharacterized protein LOC104908232 isoform X2 [Beta vulgaris subsp. vulgaris]
c36376.graph_c0	--	--	--	--	--	--	Chalcone-flavanone isomerase	Fatty-acid-binding protein 2 GN=FAP2 OS=Arabidopsis thaliana (Mouse-ear cress) PE=2 SV=2	PREDICTED: fatty-acid-binding protein 2 [Beta vulgaris subsp. vulgaris]
c62948.graph_c0	--	--	Molecular Function: nucleotide binding (GO:0000166);; Molecular Function: protein kinase activity (GO:0004672);; Cellular Component: membrane (GO:0016020);; Biological Process: phosphorylation (GO:0016310);;	--	--	--	Leucine Rich repeats (2 copies);; Leucine rich repeat;; Leucine Rich Repeat;; Leucine Rich repeat;; PIG-X / PBN1	Probable leucine-rich repeat receptor-like protein kinase At1g35710 (Precursor) GN=At1g35710 OS=Arabidopsis thaliana (Mouse-ear cress) PE=2 SV=1	PREDICTED: probable LRR receptor-like serine/threonine-protein kinase At4g08850 [Beta vulgaris subsp. vulgaris]
c37219.graph_c0	--	--	--	--	--	--	--	--	PREDICTED: protein LATERAL ORGAN BOUNDARIES [Beta vulgaris subsp. vulgaris]
c13320.graph_c0	--	--	Molecular Function: nutrient reservoir activity (GO:0045735);;	--	--	--	--	13S globulin seed storage protein 1 basic chain (Precursor) GN=FA02 OS=Fagopyrum esculentum (Common buckwheat) PE=2 SV=1	PREDICTED: glutelin type-B 5-like [Beta vulgaris subsp. vulgaris]
c27813.graph_c0	--	--	Cellular Component: chloroplast thylakoid membrane (GO:0009535);; Cellular Component: photosystem I reaction center (GO:0009538);; Cellular Component: chloroplast envelope (GO:0009941);; Cellular Component: plastoglobule (GO:0010287);; Biological Process: photosynthesis (GO:0015979);; Cellular Component: integral component of membrane (GO:0016021);;	K02699|1e-123|rcu:RCOM_1628230|Photosystem I reaction center subunit XI, chloroplast precursor, putative	--	--	Photosystem I reaction centre subunit XI	Photosystem I reaction center subunit XI, chloroplastic (Precursor) GN=PSAL OS=Spinacia oleracea (Spinach) PE=1 SV=1	PREDICTED: photosystem I reaction center subunit XI, chloroplastic [Beta vulgaris subsp. vulgaris]
c36784.graph_c0	--	--	--	--	--	--	IQ calmodulin-binding motif	Protein IQ-DOMAIN 1 GN=IQD1 OS=Arabidopsis thaliana (Mouse-ear cress) PE=1 SV=1	PREDICTED: protein IQ-DOMAIN 1-like [Beta vulgaris subsp. vulgaris]
c63701.graph_c0	--	--	--	--	--	--	--	--	PREDICTED: uncharacterized protein LOC104906994 [Beta vulgaris subsp. vulgaris]
c20573.graph_c0	[I]	Lipid transport and metabolism	--	K02160|1e-23|rcu:RCOM_1077760|Biotin carboxyl carrier protein subunit of of Het-ACCase (BCCP1) (EC:6.4.1.2)	--	--	--	Biotin carboxyl carrier protein of acetyl-CoA carboxylase, chloroplastic (Precursor) GN=ACCB-1 OS=Glycine max (Soybean) PE=1 SV=1	PREDICTED: biotin carboxyl carrier protein of acetyl-CoA carboxylase, chloroplastic-like [Beta vulgaris subsp. vulgaris]
c41853.graph_c0	[R]	General function prediction only	Molecular Function: histone acetyltransferase activity (GO:0004402);; Cellular Component: nucleus (GO:0005634);; Biological Process: histone acetylation (GO:0016573);;	K10752|0.0|rcu:RCOM_1046940|WD-repeat protein, putative (EC:2.3.1.48)	[B]	Chromatin structure and dynamics	WD domain, G-beta repeat;; Histone-binding protein RBBP4 or subunit C of CAF1 complex	WD-40 repeat-containing protein MSI4 GN=F3P11.12 OS=Arabidopsis thaliana (Mouse-ear cress) PE=1 SV=3	PREDICTED: WD-40 repeat-containing protein MSI4-like [Beta vulgaris subsp. vulgaris]
c41983.graph_c0	[U]	Intracellular trafficking, secretion, and vesicular transport	Cellular Component: integral component of membrane (GO:0016021);; Biological Process: vesicle-mediated transport (GO:0016192);;	K08517|1e-144|vvi:100258366|hypothetical protein LOC100258366	[U]	Intracellular trafficking, secretion, and vesicular transport	Regulated-SNARE-like domain;; Synaptobrevin	25.3 kDa vesicle transport protein GN=SEC22 OS=Arabidopsis thaliana (Mouse-ear cress) PE=2 SV=1	PREDICTED: 25.3 kDa vesicle transport protein [Beta vulgaris subsp. vulgaris]
c33365.graph_c0	--	--	--	--	--	--	DVL family	--	PREDICTED: uncharacterized protein LOC104904325 [Beta vulgaris subsp. vulgaris]
c22978.graph_c0	--	--	Molecular Function: phospholipid binding (GO:0005543);; Cellular Component: nucleus (GO:0005634);; Molecular Function: oxidoreductase activity (GO:0016491);;	--	[TU]	--	--	Putative clathrin assembly protein At4g02650 GN=At4g02650 OS=Arabidopsis thaliana (Mouse-ear cress) PE=2 SV=2	PREDICTED: putative clathrin assembly protein At1g03050 [Beta vulgaris subsp. vulgaris]
c72613.graph_c0	[I]	Lipid transport and metabolism	Biological Process: metabolic process (GO:0008152);; Molecular Function: oxidoreductase activity (GO:0016491);;	--	[I]	Lipid transport and metabolism	--	3-hydroxyacyl-CoA dehydrogenase GN=P0413A11.18 OS=Oryza sativa subsp. japonica (Rice) PE=1 SV=2	putative hydroxyacyl-coenzyme A dehydrogenase/3-ketoacyl-coenzyme A thiolase/enoyl-coenzyme A hydratase alpha subunit [Emiliania huxleyi CCMP1516]
c45149.graph_c0	--	--	--	--	--	--	--	--	PREDICTED: uncharacterized protein LOC104898613 [Beta vulgaris subsp. vulgaris]
c40919.graph_c0	[O]	Posttranslational modification, protein turnover, chaperones	Molecular Function: structural constituent of ribosome (GO:0003735);; Cellular Component: extracellular region (GO:0005576);; Cellular Component: cell wall (GO:0005618);; Cellular Component: nucleolus (GO:0005730);; Cellular Component: vacuolar membrane (GO:0005774);; Cellular Component: ribosome (GO:0005840);; Biological Process: translation (GO:0006412);; Biological Process: ubiquitin-dependent…	--	[J]	Translation, ribosomal structure and biogenesis	Ubiquitin family;; Ubiquitin-2 like Rad60 SUMO-like	Ubiquitin OS=Avena sativa (Oat) PE=1 SV=1	ubiquitin-60S ribosomal protein L40 fusion protein [Puccinia graminis f. sp. tritici CRL 75-36-700-3]
c35935.graph_c0	--	--	--	--	--	--	--	--	PREDICTED: uncharacterized protein LOC104889414 [Beta vulgaris subsp. vulgaris]
c18085.graph_c0	[Q]	Secondary metabolites biosynthesis, transport and catabolism	--	--	[I]	Lipid transport and metabolism	Male sterility protein;; Male sterility protein;; 3-beta hydroxysteroid dehydrogenase/isomerase family;; NAD dependent epimerase/dehydratase family;; RmlD substrate binding domain	Alcohol-forming fatty acyl-CoA reductase OS=Simmondsia chinensis (Jojoba) PE=1 SV=1	PREDICTED: fatty acyl-CoA reductase 3-like [Beta vulgaris subsp. vulgaris]
c32960.graph_c0	[R]	General function prediction only	Cellular Component: nucleus (GO:0005634);; Molecular Function: methyltransferase activity (GO:0008168);; Biological Process: methylation (GO:0032259);;	--	[BK]	--	SET domain;; Pre-SET motif	Histone-lysine N-methyltransferase SUVR3 GN=F20H23.22 OS=Arabidopsis thaliana (Mouse-ear cress) PE=2 SV=3	PREDICTED: histone-lysine N-methyltransferase SUVR3 [Beta vulgaris subsp. vulgaris]
c36129.graph_c0	[S]	Function unknown	--	--	[S]	Function unknown	VIT family	Vacuolar iron transporter homolog 2 GN=At1g76800 OS=Arabidopsis thaliana (Mouse-ear cress) PE=2 SV=1	PREDICTED: vacuolar iron transporter homolog 2-like [Beta vulgaris subsp. vulgaris]
c70308.graph_c0	--	--	Cellular Component: mitochondrion (GO:0005739);;	--	--	--	--	--	hypothetical protein (mitochondrion) [Beta vulgaris subsp. maritima]
c72384.graph_c0	--	--	Molecular Function: binding (GO:0005488);; Molecular Function: oxidoreductase activity (GO:0016491);;	--	--	--	Peroxidase	Peroxidase 69 (Precursor) GN=MHJ24.8 OS=Arabidopsis thaliana (Mouse-ear cress) PE=1 SV=1	PREDICTED: peroxidase 57-like [Beta vulgaris subsp. vulgaris]
c41352.graph_c0	--	--	--	K10881|3e-34|rcu:RCOM_1511310|26 proteasome complex subunit DSS1, putative	[S]	Function unknown	DSS1/SEM1 family	Probable 26S proteasome complex subunit sem1-1 GN=At1g64750 OS=Arabidopsis thaliana (Mouse-ear cress) PE=1 SV=1	PREDICTED: probable 26S proteasome complex subunit sem1-2 [Beta vulgaris subsp. vulgaris]
c49299.graph_c0	--	--	--	--	--	--	--	--	PREDICTED: uncharacterized protein LOC104897130 [Beta vulgaris subsp. vulgaris]
c41381.graph_c0	[MG]	--	Cellular Component: plasma membrane (GO:0005886);; Biological Process: D-xylose metabolic process (GO:0042732);; Biological Process: cellular metabolic process (GO:0044237);; Molecular Function: UDP-glucuronate decarboxylase activity (GO:0048040);; Molecular Function: coenzyme binding (GO:0050662);;	--	[GM]	--	NAD dependent epimerase/dehydratase family;; Polysaccharide biosynthesis protein;; Male sterility protein;; RmlD substrate binding domain;; 3-beta hydroxysteroid dehydrogenase/isomerase family	UDP-glucuronic acid decarboxylase 5 GN=UXS5 OS=Arabidopsis thaliana (Mouse-ear cress) PE=2 SV=1	PREDICTED: UDP-glucuronic acid decarboxylase 5 [Beta vulgaris subsp. vulgaris]
c47315.graph_c0	--	--	--	--	--	--	--	Zinc finger protein 6 OS=Arabidopsis thaliana (Mouse-ear cress) PE=2 SV=1	PREDICTED: zinc finger protein 6 [Beta vulgaris subsp. vulgaris]
c17375.graph_c0	--	--	--	--	[K]	Transcription	TFIIS helical bundle-like domain;; BAH domain	Probable mediator of RNA polymerase II transcription subunit 26a GN=T7M13.10 OS=Arabidopsis thaliana (Mouse-ear cress) PE=2 SV=1	PREDICTED: uncharacterized protein LOC100248456 [Vitis vinifera]
c26601.graph_c0	[S]	Function unknown	Molecular Function: transferase activity, transferring phosphorus-containing groups (GO:0016772);; Biological Process: response to stimulus (GO:0050896);;	--	--	--	Protein tyrosine kinase;; Leucine rich repeat;; Protein kinase domain;; Leucine Rich repeats (2 copies);; Leucine Rich Repeat;; Leucine rich repeat	Probable LRR receptor-like serine/threonine-protein kinase At2g24230 (Precursor) GN=At2g24230 OS=Arabidopsis thaliana (Mouse-ear cress) PE=2 SV=1	PREDICTED: probable LRR receptor-like serine/threonine-protein kinase At2g24230 [Beta vulgaris subsp. vulgaris]
c41723.graph_c0	--	--	--	--	--	--	Ulp1 protease family, C-terminal catalytic domain;; Plant transposase (Ptta/En/Spm family)	--	PREDICTED: uncharacterized protein LOC104907040 [Beta vulgaris subsp. vulgaris]
c27240.graph_c0	[E]	Amino acid transport and metabolism	Molecular Function: 5-methyltetrahydropteroyltriglutamate-homocysteine S-methyltransferase activity (GO:0003871);; Cellular Component: cytosol (GO:0005829);; Molecular Function: zinc ion binding (GO:0008270);; Molecular Function: methionine synthase activity (GO:0008705);; Biological Process: methionine biosynthetic process (GO:0009086);; Cellular Component: chloroplast (GO:0009507);;	K00549|0.0|pop:POPTR_573959|MS4	[E]	Amino acid transport and metabolism	Cobalamin-independent synthase, N-terminal domain;; Cobalamin-independent synthase, Catalytic domain	5-methyltetrahydropteroyltriglutamate--homocysteine methyltransferase GN=METE OS=Catharanthus roseus (Madagascar periwinkle) PE=2 SV=1	PREDICTED: 5-methyltetrahydropteroyltriglutamate--homocysteine methyltransferase [Beta vulgaris subsp. vulgaris]
c38280.graph_c0	--	--	--	--	--	--	--	--	PREDICTED: ubinuclein-2 isoform X1 [Beta vulgaris subsp. vulgaris]
c28053.graph_c0	[P]	Inorganic ion transport and metabolism	Molecular Function: voltage-gated chloride channel activity (GO:0005247);; Biological Process: chloride transport (GO:0006821);; Cellular Component: integral component of membrane (GO:0016021);; Molecular Function: adenyl nucleotide binding (GO:0030554);; Biological Process: transmembrane transport (GO:0055085);;	--	[P]	Inorganic ion transport and metabolism	Voltage gated chloride channel;; CBS domain	Chloride channel protein CLC-c GN=K9P8.3 OS=Arabidopsis thaliana (Mouse-ear cress) PE=1 SV=1	PREDICTED: chloride channel protein CLC-c-like [Beta vulgaris subsp. vulgaris]
c43739.graph_c0	--	--	Molecular Function: copper ion binding (GO:0005507);; Molecular Function: electron carrier activity (GO:0009055);; Biological Process: reproductive process (GO:0022414);; Biological Process: multicellular organismal process (GO:0032501);;	--	--	--	Plastocyanin-like domain	Basic blue protein OS=Cucumis sativus (Cucumber) PE=1 SV=1	PREDICTED: basic blue protein-like [Beta vulgaris subsp. vulgaris]
c12369.graph_c0	[P]	Inorganic ion transport and metabolism	--	--	[Q]	Secondary metabolites biosynthesis, transport and catabolism	Flavin-binding monooxygenase-like;; Pyridine nucleotide-disulphide oxidoreductase;; NAD(P)-binding Rossmann-like domain;; Pyridine nucleotide-disulphide oxidoreductase;; FAD dependent oxidoreductase;; Pyridine nucleotide-disulphide oxidoreductase;; L-lysine 6-monooxygenase (NADPH-requiring);; FAD binding domain;; HI0933-like protein;; FAD-NAD(P)-binding;; Thi4 family;; FAD binding domain;; Flavin…	Flavin-containing monooxygenase FMO GS-OX-like 4 GN=At1g62600 OS=Arabidopsis thaliana (Mouse-ear cress) PE=2 SV=1	PREDICTED: flavin-containing monooxygenase FMO GS-OX-like 4 [Beta vulgaris subsp. vulgaris]
c12440.graph_c0	--	--	Cellular Component: membrane (GO:0016020);;	--	[S]	Function unknown	Yip1 domain	--	PREDICTED: protein YIPF1 homolog [Beta vulgaris subsp. vulgaris]
c10433.graph_c0	[S]	Function unknown	Cellular Component: extracellular region (GO:0005576);;	--	[S]	Function unknown	Cysteine-rich secretory protein family	Pathogenesis-related protein PR-1 type (Precursor) OS=Sambucus nigra (European elder) PE=2 SV=1	PREDICTED: pathogenesis-related protein PR-1 type-like [Beta vulgaris subsp. vulgaris]
c24143.graph_c0	--	--	--	--	--	--	--	--	PREDICTED: uncharacterized protein LOC104893812, partial [Beta vulgaris subsp. vulgaris]
c34476.graph_c0	[J]	Translation, ribosomal structure and biogenesis	Molecular Function: structural constituent of ribosome (GO:0003735);; Cellular Component: nucleolus (GO:0005730);; Cellular Component: mitochondrion (GO:0005739);; Biological Process: translation (GO:0006412);; Cellular Component: cytosolic large ribosomal subunit (GO:0022625);;	--	[J]	Translation, ribosomal structure and biogenesis	Ribosomal protein L14p/L23e	60S ribosomal protein L23 GN=T27C4.4 OS=Arabidopsis thaliana (Mouse-ear cress) PE=2 SV=3	ribosomal Pr 117, partial [Triticum aestivum]
c29068.graph_c0	[L]	Replication, recombination and repair	Biological Process: mitotic G2 phase (GO:0000085);; Biological Process: mRNA splicing, via spliceosome (GO:0000398);; Molecular Function: nucleic acid binding (GO:0003676);; Molecular Function: RNA helicase activity (GO:0003724);; Molecular Function: ATP binding (GO:0005524);; Cellular Component: cytosol (GO:0005829);; Biological Process: cell adhesion (GO:0007155);; Molecular Function: ATP-depen…	K12598|0.0|vvi:100246661|hypothetical protein LOC100246661	[A]	RNA processing and modification	rRNA-processing arch domain;; DSHCT (NUC185) domain;; DEAD/DEAH box helicase;; Helicase conserved C-terminal domain	DEAD-box ATP-dependent RNA helicase ISE2, chloroplastic (Precursor) GN=F20P5.20 OS=Arabidopsis thaliana (Mouse-ear cress) PE=1 SV=2	PREDICTED: superkiller viralicidic activity 2-like 2 [Beta vulgaris subsp. vulgaris]
c66158.graph_c0	[C]	Energy production and conversion	Biological Process: tricarboxylic acid cycle (GO:0006099);; Molecular Function: electron carrier activity (GO:0009055);; Molecular Function: oxidoreductase activity (GO:0016491);; Molecular Function: 2 iron, 2 sulfur cluster binding (GO:0051537);;	K00235|4e-62|vvi:100244487|hypothetical protein LOC100244487	[C]	Energy production and conversion	2Fe-2S iron-sulfur cluster binding domain	Succinate dehydrogenase [ubiquinone] iron-sulfur subunit 2, mitochondrial (Precursor) OS=Arabidopsis thaliana (Mouse-ear cress) PE=1 SV=2	Putative Succinate dehydrogenase [ubiquinone] iron-sulfur subunit [Rhizopus microsporus]
c40544.graph_c1	[O]	Posttranslational modification, protein turnover, chaperones	Biological Process: mitotic G2 phase (GO:0000085);; Biological Process: RNA methylation (GO:0001510);; Molecular Function: ATP binding (GO:0005524);; Cellular Component: cytosol (GO:0005829);; Biological Process: gluconeogenesis (GO:0006094);; Biological Process: protein folding (GO:0006457);; Biological Process: cytoskeleton organization (GO:0007010);; Biological Process: pyrimidine ribonucleoti…	K09500|0.0|vvi:100257135|hypothetical protein LOC100257135	[O]	Posttranslational modification, protein turnover, chaperones	TCP-1/cpn60 chaperonin family	T-complex protein 1 subunit theta {ECO:0000303|PubMed:11599560} OS=Arabidopsis thaliana (Mouse-ear cress) PE=1 SV=1	PREDICTED: T-complex protein 1 subunit theta-like [Beta vulgaris subsp. vulgaris]
c61531.graph_c0	--	--	--	--	--	--	--	--	PREDICTED: uncharacterized protein LOC104886896 [Beta vulgaris subsp. vulgaris]
c29434.graph_c0	--	--	Cellular Component: cytosol (GO:0005829);; Cellular Component: plasma membrane (GO:0005886);;	--	[U]	Intracellular trafficking, secretion, and vesicular transport	Vps51/Vps67;; COG (conserved oligomeric Golgi) complex component, COG2	Exocyst complex component EXO84B GN=EXO84B OS=Arabidopsis thaliana (Mouse-ear cress) PE=1 SV=1	PREDICTED: exocyst complex component EXO84B [Beta vulgaris subsp. vulgaris]
c38452.graph_c0	--	--	--	--	--	--	Transferase family	Protein ECERIFERUM 1 GN=CER2 OS=Arabidopsis thaliana (Mouse-ear cress) PE=1 SV=1	PREDICTED: protein ECERIFERUM 1 [Beta vulgaris subsp. vulgaris]
c67353.graph_c0	--	--	--	--	--	--	--	--	hypothetical protein CYME_CMI023C [Cyanidioschyzon merolae strain 10D]
c11744.graph_c0	--	--	Cellular Component: nucleus (GO:0005634);; Cellular Component: cytosol (GO:0005829);; Cellular Component: plasma membrane (GO:0005886);; Biological Process: toxin catabolic process (GO:0009407);; Cellular Component: plant-type cell wall (GO:0009505);; Biological Process: gibberellin biosynthetic process (GO:0009686);; Biological Process: gibberellic acid mediated signaling pathway (GO:0009740);; …	--	[O]	Posttranslational modification, protein turnover, chaperones	14-3-3 protein	14-3-3-like protein GF14 kappa GN=GRF8 OS=Arabidopsis thaliana (Mouse-ear cress) PE=1 SV=2	PREDICTED: 14-3-3-like protein GF14 kappa [Beta vulgaris subsp. vulgaris]
c63313.graph_c0	--	--	--	--	--	--	--	--	hypothetical protein VITISV_010209 [Vitis vinifera]
c35523.graph_c0	[R]	General function prediction only	Biological Process: RNA splicing (GO:0008380);;	K12662|0.0|vvi:100243602|hypothetical protein LOC100243602	[A]	RNA processing and modification	WD domain, G-beta repeat;; pre-mRNA processing factor 4 (PRP4) like;; Eukaryotic translation initiation factor eIF2A	U4/U6 small nuclear ribonucleoprotein PRP4-like protein GN=EMB2776 OS=Arabidopsis thaliana (Mouse-ear cress) PE=2 SV=1	PREDICTED: U4/U6 small nuclear ribonucleoprotein PRP4-like protein [Beta vulgaris subsp. vulgaris]
c30184.graph_c0	--	--	--	--	--	--	--	Uncharacterized protein At4g18490 GN=At4g18490 OS=Arabidopsis thaliana (Mouse-ear cress) PE=2 SV=3	PREDICTED: uncharacterized protein At4g18490 isoform X2 [Beta vulgaris subsp. vulgaris]
c25375.graph_c0	--	--	--	--	--	--	--	--	PREDICTED: GATA zinc finger domain-containing protein 14 [Beta vulgaris subsp. vulgaris]
c37603.graph_c2	--	--	--	--	--	--	Plant protein of unknown function (DUF868)	--	PREDICTED: uncharacterized protein LOC104894363 [Beta vulgaris subsp. vulgaris]
c41598.graph_c0	--	--	--	--	[A]	RNA processing and modification	Est1 DNA/RNA binding domain;; Telomerase activating protein Est1	Protein SMG7 GN=SMG7 OS=Arabidopsis thaliana (Mouse-ear cress) PE=2 SV=1	PREDICTED: protein SMG7-like [Beta vulgaris subsp. vulgaris]
c39293.graph_c0	--	--	--	--	[T]	Signal transduction mechanisms	Leucine Rich Repeat	Putative disease resistance RPP13-like protein 1 GN=RPPL1 OS=Arabidopsis thaliana (Mouse-ear cress) PE=3 SV=1	PREDICTED: disease resistance protein RGA2-like [Beta vulgaris subsp. vulgaris]
c42288.graph_c0	--	--	Biological Process: dephosphorylation (GO:0016311);; Molecular Function: phosphatase activity (GO:0016791);;	--	--	--	5' nucleotidase, deoxy (Pyrimidine), cytosolic type C protein (NT5C);; NLI interacting factor-like phosphatase	--	PREDICTED: uncharacterized protein LOC104901706 [Beta vulgaris subsp. vulgaris]
c36978.graph_c0	--	--	Cellular Component: membrane (GO:0016020);; Cellular Component: intracellular membrane-bounded organelle (GO:0043231);; Cellular Component: cytoplasmic part (GO:0044444);; Biological Process: single-organism transport (GO:0044765);;	--	[C]	Energy production and conversion	Mitochondrial carrier protein	ADP,ATP carrier protein 3, mitochondrial (Precursor) GN=F20O9.60 OS=Arabidopsis thaliana (Mouse-ear cress) PE=2 SV=1	PREDICTED: ADP,ATP carrier protein 1, mitochondrial-like isoform X1 [Beta vulgaris subsp. vulgaris]
c39964.graph_c0	--	--	--	--	[J]	Translation, ribosomal structure and biogenesis	Piwi domain;; PAZ domain;; Domain of unknown function (DUF1785)	Protein argonaute 2 GN=AGO2 OS=Arabidopsis thaliana (Mouse-ear cress) PE=1 SV=1	PREDICTED: protein argonaute 2 [Beta vulgaris subsp. vulgaris]
c77769.graph_c0	[G]	Carbohydrate transport and metabolism	--	--	--	--	Binding-protein-dependent transport system inner membrane component	--	hypothetical protein BATDEDRAFT_29030 [Batrachochytrium dendrobatidis JAM81]
c41032.graph_c0	[IM]	--	Cellular Component: chloroplast stroma (GO:0009570);; Biological Process: isopentenyl diphosphate biosynthetic process, methylerythritol 4-phosphate pathway (GO:0019288);; Molecular Function: 4-hydroxy-3-methylbut-2-en-1-yl diphosphate synthase activity (GO:0046429);; Biological Process: response to antibiotic (GO:0046677);; Molecular Function: 4-hydroxy-3-methylbut-2-en-1-yl diphosphate reductas…	K03527|0.0|rcu:RCOM_0938310|4-hydroxy-3-methylbut-2-enyl diphosphate reductase, putative (EC:1.17.1.2)	--	--	LytB protein	4-hydroxy-3-methylbut-2-enyl diphosphate reductase, chloroplastic (Precursor) GN=F10M10.120 OS=Arabidopsis thaliana (Mouse-ear cress) PE=2 SV=1	PREDICTED: 4-hydroxy-3-methylbut-2-enyl diphosphate reductase, chloroplastic [Beta vulgaris subsp. vulgaris]
c20863.graph_c0	--	--	--	--	[E]	Amino acid transport and metabolism	--	Mediator of RNA polymerase II transcription subunit 15a GN=F7H2.12 OS=Arabidopsis thaliana (Mouse-ear cress) PE=1 SV=1	PREDICTED: mediator of RNA polymerase II transcription subunit 12-like [Beta vulgaris subsp. vulgaris]
c25197.graph_c0	--	--	--	--	--	--	--	--	PREDICTED: uncharacterized protein LOC104898043 [Beta vulgaris subsp. vulgaris]
c40735.graph_c1	--	--	--	--	--	--	SWIM zinc finger	--	PREDICTED: uncharacterized protein LOC104908537 [Beta vulgaris subsp. vulgaris]
c23094.graph_c0	--	--	Molecular Function: nucleic acid binding (GO:0003676);; Molecular Function: zinc ion binding (GO:0008270);; Biological Process: DNA integration (GO:0015074);;	--	[R]	General function prediction only	--	Endonuclease OS=Nicotiana tabacum (Common tobacco) PE=2 SV=1	unnamed protein product [Nicotiana tabacum]
c53714.graph_c0	--	--	--	--	--	--	--	--	hypothetical protein Csa_1G185110 [Cucumis sativus]
c17529.graph_c0	--	--	--	--	--	--	AP2 domain	Ethylene-responsive transcription factor 4 GN=At3g15210 OS=Arabidopsis thaliana (Mouse-ear cress) PE=1 SV=1	PREDICTED: ethylene-responsive transcription factor 4 [Beta vulgaris subsp. vulgaris]
c12193.graph_c0	--	--	Molecular Function: protein binding (GO:0005515);; Biological Process: response to gibberellin (GO:0009739);;	--	--	--	ZF-HD protein dimerisation region	Zinc-finger homeodomain protein 10 GN=MKM21.8 OS=Arabidopsis thaliana (Mouse-ear cress) PE=1 SV=1	PREDICTED: zinc-finger homeodomain protein 9-like [Beta vulgaris subsp. vulgaris]
c16492.graph_c0	--	--	Cellular Component: integral component of membrane (GO:0016021);; Biological Process: transmembrane transport (GO:0055085);;	--	[GE]	--	Triose-phosphate Transporter family	Uncharacterized membrane protein At1g06890 GN=At1g06890 OS=Arabidopsis thaliana (Mouse-ear cress) PE=1 SV=1	PREDICTED: uncharacterized membrane protein At1g06890 [Beta vulgaris subsp. vulgaris]
c40468.graph_c0	--	--	--	--	[S]	Function unknown	--	--	PREDICTED: WD repeat-containing protein 70 [Beta vulgaris subsp. vulgaris]
c79949.graph_c0	--	--	--	--	[D]	Cell cycle control, cell division, chromosome partitioning	--	--	PREDICTED: uncharacterized protein LOC104905070 [Beta vulgaris subsp. vulgaris]
c34422.graph_c0	--	--	Biological Process: nucleobase-containing compound metabolic process (GO:0006139);; Biological Process: fatty acid biosynthetic process (GO:0006633);; Biological Process: phosphate-containing compound metabolic process (GO:0006796);; Cellular Component: chloroplast thylakoid (GO:0009534);; Biological Process: response to red or far red light (GO:0009639);; Biological Process: cellular component o…	--	--	--	--	Calcium sensing receptor, chloroplastic (Precursor) GN=MYJ24.5 OS=Arabidopsis thaliana (Mouse-ear cress) PE=1 SV=1	PREDICTED: calcium sensing receptor, chloroplastic [Beta vulgaris subsp. vulgaris]
c63994.graph_c0	--	--	Molecular Function: nucleic acid binding (GO:0003676);; Cellular Component: mitochondrion (GO:0005739);; Biological Process: DNA integration (GO:0015074);;	--	[R]	General function prediction only	--	Uncharacterized mitochondrial protein AtMg00810 GN=AtMg00810 OS=Arabidopsis thaliana (Mouse-ear cress) PE=4 SV=1	Putative mitochondrial protein, partial [Glycine soja]
c11522.graph_c0	--	--	Cellular Component: mitochondrial respiratory chain complex III (GO:0005750);; Biological Process: mitochondrial electron transport, ubiquinol to cytochrome c (GO:0006122);; Molecular Function: ubiquinol-cytochrome-c reductase activity (GO:0008121);; Biological Process: photorespiration (GO:0009853);;	K00419|9e-37|pop:POPTR_832961|hypothetical protein	[C]	Energy production and conversion	Ubiquinol-cytochrome C reductase, UQCRX/QCR9 like	Cytochrome b-c1 complex subunit 9 OS=Solanum tuberosum (Potato) PE=1 SV=1	PREDICTED: cytochrome b-c1 complex subunit 9 [Beta vulgaris subsp. vulgaris]
c69681.graph_c0	--	--	Molecular Function: nucleic acid binding (GO:0003676);; Molecular Function: RNA-directed DNA polymerase activity (GO:0003964);; Molecular Function: zinc ion binding (GO:0008270);; Biological Process: DNA integration (GO:0015074);;	--	[R]	General function prediction only	--	--	integrase [Beta vulgaris]
c48449.graph_c0	--	--	--	--	--	--	--	--	PREDICTED: uncharacterized protein LOC104898613 [Beta vulgaris subsp. vulgaris]
c31415.graph_c0	--	--	--	--	--	--	--	--	PREDICTED: uncharacterized protein LOC104904010 isoform X1 [Beta vulgaris subsp. vulgaris]
c10565.graph_c0	--	--	--	--	--	--	--	--	PREDICTED: uncharacterized protein LOC104889591 [Beta vulgaris subsp. vulgaris]
c35030.graph_c0	[R]	General function prediction only	Molecular Function: nucleotide binding (GO:0000166);; Molecular Function: nucleic acid binding (GO:0003676);; Molecular Function: zinc ion binding (GO:0008270);;	K12896|2e-76|rcu:RCOM_0285870|arginine/serine-rich splicing factor, putative	[A]	RNA processing and modification	RNA recognition motif. (a.k.a. RRM, RBD, or RNP domain);; RNA recognition motif (a.k.a. RRM, RBD, or RNP domain);; Zinc knuckle;; RNA recognition motif. (a.k.a. RRM, RBD, or RNP domain)	Serine/arginine-rich splicing factor RSZ21 GN=T23E23.2 OS=Arabidopsis thaliana (Mouse-ear cress) PE=1 SV=1	PREDICTED: serine/arginine-rich splicing factor RSZ21 [Beta vulgaris subsp. vulgaris]
c47511.graph_c0	--	--	--	--	--	--	Domain of unknown function (DUF4283)	--	PREDICTED: uncharacterized protein LOC104885398 [Beta vulgaris subsp. vulgaris]
c29948.graph_c0	[RTKL]	--	--	K08333|0.0|vvi:100256057|similar to protein kinase family protein / WD-40 repeat family protein	[T]	Signal transduction mechanisms	Protein kinase domain;; WD domain, G-beta repeat;; HEAT repeat;; Protein tyrosine kinase	3-phosphoinositide-dependent protein kinase 2 OS=Arabidopsis thaliana (Mouse-ear cress) PE=1 SV=1	PREDICTED: probable serine/threonine-protein kinase vps15 [Beta vulgaris subsp. vulgaris]
c39700.graph_c0	--	--	--	--	--	--	--	--	unnamed protein product [Coffea canephora]
c31632.graph_c0	[RTKL]	--	Molecular Function: protein serine/threonine kinase activity (GO:0004674);; Molecular Function: ATP binding (GO:0005524);; Biological Process: protein phosphorylation (GO:0006468);;	--	--	--	Wall-associated receptor kinase C-terminal;; Wall-associated receptor kinase galacturonan-binding;; Protein kinase domain;; Protein tyrosine kinase	Probable receptor-like protein kinase At5g39020 (Precursor) GN=At5g39020 OS=Arabidopsis thaliana (Mouse-ear cress) PE=2 SV=1	PREDICTED: probable receptor-like protein kinase At1g67000 [Beta vulgaris subsp. vulgaris]
c16259.graph_c0	[R]	General function prediction only	Molecular Function: nucleotide binding (GO:0000166);; Cellular Component: nuclear envelope (GO:0005635);; Cellular Component: heterotrimeric G-protein complex (GO:0005834);; Biological Process: protein targeting to mitochondrion (GO:0006626);; Biological Process: fatty acid beta-oxidation (GO:0006635);; Biological Process: proteasome-mediated ubiquitin-dependent protein catabolic process (GO:0043…	K14299|1e-162|rcu:RCOM_1691290|nucleotide binding protein, putative	[YU]	--	WD domain, G-beta repeat	Protein SEH1 {ECO:0000303|PubMed:21189294} OS=Arabidopsis thaliana (Mouse-ear cress) PE=1 SV=1	PREDICTED: protein SEH1 [Beta vulgaris subsp. vulgaris]
c25153.graph_c0	--	--	--	--	--	--	--	--	PREDICTED: uncharacterized protein LOC104885400 isoform X2 [Beta vulgaris subsp. vulgaris]
c22942.graph_c0	--	--	Molecular Function: catalytic activity (GO:0003824);; Biological Process: biosynthetic process (GO:0009058);;	--	--	--	Cytidylyltransferase	--	PREDICTED: uncharacterized protein LOC104908499 isoform X2 [Beta vulgaris subsp. vulgaris]
c9647.graph_c0	--	--	Molecular Function: kinase activity (GO:0016301);; Biological Process: phosphorylation (GO:0016310);;	--	[IT]	--	--	--	PREDICTED: diacylglycerol kinase 5 isoform X3 [Beta vulgaris subsp. vulgaris]
c18081.graph_c0	[O]	Posttranslational modification, protein turnover, chaperones	Biological Process: cellular protein metabolic process (GO:0044267);;	--	[O]	Posttranslational modification, protein turnover, chaperones	FKBP-type peptidyl-prolyl cis-trans isomerase	Peptidyl-prolyl cis-trans isomerase FKBP53 GN=FKBP53 OS=Arabidopsis thaliana (Mouse-ear cress) PE=1 SV=1	PREDICTED: peptidyl-prolyl cis-trans isomerase FKBP43-like [Beta vulgaris subsp. vulgaris]
c12132.graph_c0	--	--	--	--	[GO]	--	--	Early nodulin-20 (Precursor) GN=ENOD20 OS=Medicago truncatula (Barrel medic) PE=3 SV=1	hypothetical protein VOLCADRAFT_115755 [Volvox carteri f. nagariensis]
c58876.graph_c0	--	--	--	--	--	--	MULE transposase domain	--	PREDICTED: uncharacterized protein LOC104908911 [Beta vulgaris subsp. vulgaris]
c36332.graph_c1	--	--	--	--	[R]	General function prediction only	C2H2-type zinc finger	Zinc finger protein ZAT10 GN=T22C5.18 OS=Arabidopsis thaliana (Mouse-ear cress) PE=2 SV=1	PREDICTED: zinc finger protein ZAT10 [Beta vulgaris subsp. vulgaris]
c33092.graph_c0	--	--	--	--	--	--	--	--	YALI0C22297p [Yarrowia lipolytica]
c32617.graph_c0	--	--	--	--	[Q]	Secondary metabolites biosynthesis, transport and catabolism	--	Short-chain dehydrogenase TIC 32, chloroplastic GN=TIC32 OS=Pisum sativum (Garden pea) PE=1 SV=1	PREDICTED: short-chain dehydrogenase TIC 32, chloroplastic-like [Beta vulgaris subsp. vulgaris]
c51420.graph_c0	--	--	--	--	--	--	Late embryogenesis abundant protein	--	PREDICTED: uncharacterized protein LOC104886903 [Beta vulgaris subsp. vulgaris]
c26968.graph_c1	--	--	--	--	--	--	--	--	PREDICTED: uncharacterized protein LOC104884213 [Beta vulgaris subsp. vulgaris]
c38319.graph_c0	--	--	Molecular Function: aspartic-type endopeptidase activity (GO:0004190);; Biological Process: proteolysis (GO:0006508);; Biological Process: lipid metabolic process (GO:0006629);;	K08245|0.0|pop:POPTR_834438|hypothetical protein	[O]	Posttranslational modification, protein turnover, chaperones	Eukaryotic aspartyl protease;; Saposin-like type B, region 2;; Saposin-like type B, region 1;; Xylanase inhibitor N-terminal;; Xylanase inhibitor C-terminal	Aspartic proteinase (Precursor) GN=OJ1127_B08.13 OS=Oryza sativa subsp. japonica (Rice) PE=2 SV=2	PREDICTED: aspartic proteinase-like [Beta vulgaris subsp. vulgaris]
c79280.graph_c0	[S]	Function unknown	--	--	--	--	Helix-turn-helix domain	--	unnamed protein product [Coffea canephora]
c33263.graph_c0	[I]	Lipid transport and metabolism	Molecular Function: enoyl-CoA hydratase activity (GO:0004300);; Cellular Component: mitochondrion (GO:0005739);; Cellular Component: peroxisome (GO:0005777);; Biological Process: fatty acid beta-oxidation (GO:0006635);; Molecular Function: delta3,5-delta2,4-dienoyl-CoA isomerase activity (GO:0051750);;	K12663|1e-129|pop:POPTR_548063|enoyl-CoA hydratase/delta3,5-delta2,4-dienoyl-CoA isomerase (EC:4.2.1.17)	[I]	Lipid transport and metabolism	Enoyl-CoA hydratase/isomerase family	3-hydroxyacyl-CoA dehydrogenase OS=Cucumis sativus (Cucumber) PE=1 SV=1	PREDICTED: delta(3,5)-Delta(2,4)-dienoyl-CoA isomerase, mitochondrial [Beta vulgaris subsp. vulgaris]
c42529.graph_c0	[S]	Function unknown	Cellular Component: mitochondrion (GO:0005739);; Cellular Component: endoplasmic reticulum (GO:0005783);; Biological Process: protein folding (GO:0006457);; Cellular Component: integral component of membrane (GO:0016021);;	--	[S]	Function unknown	ORMDL family	--	PREDICTED: uncharacterized protein C119.09c-like [Beta vulgaris subsp. vulgaris]
c39659.graph_c2	--	--	--	--	[TU]	--	Beige/BEACH domain	--	unnamed protein product [Coffea canephora]
c10796.graph_c0	--	--	--	--	[AJ]	--	--	Probable pre-mRNA-splicing factor ATP-dependent RNA helicase GN=At3g26560 OS=Arabidopsis thaliana (Mouse-ear cress) PE=1 SV=2	PREDICTED: probable ATP-dependent RNA helicase DHX37 [Beta vulgaris subsp. vulgaris]
c19561.graph_c0	--	--	Cellular Component: plasma membrane (GO:0005886);; Molecular Function: transferase activity, transferring phosphorus-containing groups (GO:0016772);;	--	--	--	--	--	PREDICTED: uncharacterized protein LOC104906948 [Beta vulgaris subsp. vulgaris]
c79325.graph_c0	[R]	General function prediction only	--	--	--	--	--	--	--
c20878.graph_c0	--	--	--	--	[P]	Inorganic ion transport and metabolism	Domain of unknown function (DUF1984)	Glutathione gamma-glutamylcysteinyltransferase 3 GN=PCS3 OS=Lotus japonicus (Lotus corniculatus var. japonicus) PE=2 SV=1	PREDICTED: glutathione gamma-glutamylcysteinyltransferase 3-like isoform X2 [Beta vulgaris subsp. vulgaris]
c30880.graph_c0	[DZ]	--	Cellular Component: nucleus (GO:0005634);; Cellular Component: microtubule organizing center (GO:0005815);; Cellular Component: spindle microtubule (GO:0005876);; Molecular Function: microtubule binding (GO:0008017);; Cellular Component: phragmoplast (GO:0009524);; Cellular Component: preprophase band (GO:0009574);; Biological Process: thigmotropism (GO:0009652);; Biological Process: positive gra…	K10436|1e-128|pop:POPTR_661879|hypothetical protein	[DZ]	--	EB1-like C-terminal motif;; Calponin homology (CH) domain	Microtubule-associated protein RP/EB family member 1B GN=EB1B OS=Arabidopsis thaliana (Mouse-ear cress) PE=1 SV=1	PREDICTED: microtubule-associated protein RP/EB family member 1B-like isoform X1 [Beta vulgaris subsp. vulgaris]
c31044.graph_c0	[I]	Lipid transport and metabolism	Molecular Function: transferase activity, transferring phosphorus-containing groups (GO:0016772);; Biological Process: cellular metabolic process (GO:0044237);; Biological Process: organic substance metabolic process (GO:0071704);;	K08744|2e-77|vvi:100241827|hypothetical protein LOC100241827	[I]	Lipid transport and metabolism	--	CDP-diacylglycerol--glycerol-3-phosphate 3-phosphatidyltransferase 1, chloroplastic (Precursor) GN=Os01g0789100 OS=Oryza sativa subsp. japonica (Rice) PE=2 SV=1	PREDICTED: cardiolipin synthase, mitochondrial [Beta vulgaris subsp. vulgaris]
c41233.graph_c0	--	--	Cellular Component: mitochondrial outer membrane (GO:0005741);; Molecular Function: voltage-gated anion channel activity (GO:0008308);; Biological Process: regulation of anion transport (GO:0044070);; Biological Process: transmembrane transport (GO:0055085);;	--	[P]	Inorganic ion transport and metabolism	Eukaryotic porin	Mitochondrial outer membrane protein porin 2 GN=VDAC2 OS=Arabidopsis thaliana (Mouse-ear cress) PE=1 SV=1	PREDICTED: mitochondrial outer membrane protein porin 2-like [Beta vulgaris subsp. vulgaris]
c18015.graph_c0	[CI]	--	Molecular Function: iron ion binding (GO:0005506);; Biological Process: fatty acid biosynthetic process (GO:0006633);; Molecular Function: oxidoreductase activity, acting on paired donors, with oxidation of a pair of donors resulting in the reduction of molecular oxygen to two molecules of water (GO:0016717);; Molecular Function: heme binding (GO:0020037);; Biological Process: oxidation-reduction…	K13076|0.0|rcu:RCOM_0797300|fatty acid desaturase, putative	[I]	Lipid transport and metabolism	Fatty acid desaturase;; Cytochrome b5-like Heme/Steroid binding domain	Delta(8)-fatty-acid desaturase 1 GN=SLD1 OS=Arabidopsis thaliana (Mouse-ear cress) PE=1 SV=1	PREDICTED: delta(8)-fatty-acid desaturase-like [Beta vulgaris subsp. vulgaris]
c33953.graph_c0	[RTKL]	--	Molecular Function: nucleotide binding (GO:0000166);; Molecular Function: protein kinase activity (GO:0004672);; Biological Process: phosphorylation (GO:0016310);;	--	--	--	Protein kinase domain;; Protein tyrosine kinase;; S-locus glycoprotein family;; D-mannose binding lectin;; PAN-like domain	G-type lectin S-receptor-like serine/threonine-protein kinase At2g19130 (Precursor) GN=At2g19130 OS=Arabidopsis thaliana (Mouse-ear cress) PE=2 SV=1	PREDICTED: G-type lectin S-receptor-like serine/threonine-protein kinase At2g19130 [Beta vulgaris subsp. vulgaris]
c39131.graph_c0	[E]	Amino acid transport and metabolism	--	--	[OE]	--	Serine carboxypeptidase	Serine carboxypeptidase-like 18 (Precursor) GN=SCPL18 OS=Arabidopsis thaliana (Mouse-ear cress) PE=2 SV=2	PREDICTED: serine carboxypeptidase-like 13 [Beta vulgaris subsp. vulgaris]
c32660.graph_c0	[R]	General function prediction only	--	--	[B]	Chromatin structure and dynamics	SET domain	Histone-lysine N-methyltransferase ATXR4 (Precursor) GN=F15M7.15 OS=Arabidopsis thaliana (Mouse-ear cress) PE=2 SV=2	PREDICTED: histone-lysine N-methyltransferase ATXR4 [Beta vulgaris subsp. vulgaris]
c43701.graph_c0	--	--	Biological Process: single-organism process (GO:0044699);;	--	[K]	Transcription	--	Formin-like protein 14 GN=FH14 OS=Arabidopsis thaliana (Mouse-ear cress) PE=3 SV=3	PREDICTED: parafibromin [Beta vulgaris subsp. vulgaris]
c28199.graph_c0	--	--	--	--	--	--	Protein of unknown function DUF260	LOB domain-containing protein 37 GN=K8K14.16 OS=Arabidopsis thaliana (Mouse-ear cress) PE=2 SV=1	PREDICTED: LOB domain-containing protein 37 [Beta vulgaris subsp. vulgaris]
c80307.graph_c0	[GER]	--	--	--	--	--	--	--	--
c28770.graph_c0	--	--	Molecular Function: motor activity (GO:0003774);; Molecular Function: actin binding (GO:0003779);; Molecular Function: ATP binding (GO:0005524);; Cellular Component: myosin complex (GO:0016459);;	--	[Z]	Cytoskeleton	Myosin head (motor domain);; Myosin head (motor domain)	Myosin-7 GN=T1G11.15 OS=Arabidopsis thaliana (Mouse-ear cress) PE=3 SV=1	PREDICTED: myosin-6-like [Beta vulgaris subsp. vulgaris]
c43108.graph_c0	--	--	Cellular Component: peroxisome (GO:0005777);; Molecular Function: phosphotransferase activity, alcohol group as acceptor (GO:0016773);;	--	[T]	Signal transduction mechanisms	Phosphatidylinositol 3- and 4-kinase;; Ubiquitin family;; Ubiquitin-2 like Rad60 SUMO-like	Phosphatidylinositol 4-kinase gamma 3 GN=PI4KG3 OS=Arabidopsis thaliana (Mouse-ear cress) PE=2 SV=1	PREDICTED: phosphatidylinositol 4-kinase gamma 3 [Beta vulgaris subsp. vulgaris]
c17100.graph_c1	--	--	Molecular Function: GTPase activity (GO:0003924);; Molecular Function: GTP binding (GO:0005525);; Cellular Component: endoplasmic reticulum membrane (GO:0005789);; Biological Process: GTP catabolic process (GO:0006184);; Cellular Component: integral component of membrane (GO:0016021);;	--	[R]	General function prediction only	Root hair defective 3 GTP-binding protein (RHD3);; Guanylate-binding protein, N-terminal domain	Protein ROOT HAIR DEFECTIVE 3 {ECO:0000255|HAMAP-Rule:MF_03109} GN=MCP4.11 OS=Arabidopsis thaliana (Mouse-ear cress) PE=1 SV=1	PREDICTED: protein ROOT HAIR DEFECTIVE 3-like [Beta vulgaris subsp. vulgaris]
c11271.graph_c0	[O]	Posttranslational modification, protein turnover, chaperones	Molecular Function: ATP binding (GO:0005524);; Cellular Component: mitochondrion (GO:0005739);; Cellular Component: chloroplast stroma (GO:0009570);; Cellular Component: thylakoid (GO:0009579);; Biological Process: chloroplast organization (GO:0009658);; Biological Process: embryo development (GO:0009790);; Cellular Component: chloroplast envelope (GO:0009941);; Cellular Component: membrane (GO:0…	--	[O]	Posttranslational modification, protein turnover, chaperones	TCP-1/cpn60 chaperonin family;; Glycosyltransferase family 10 (fucosyltransferase)	RuBisCO large subunit-binding protein subunit alpha, chloroplastic (Precursor) OS=Pisum sativum (Garden pea) PE=1 SV=2	PREDICTED: ruBisCO large subunit-binding protein subunit alpha [Beta vulgaris subsp. vulgaris]
c27601.graph_c0	[H]	Coenzyme transport and metabolism	--	--	--	--	Zinc-finger of C2H2 type	Histone deacetylase HDT2 GN=HDT2 OS=Zea mays (Maize) PE=1 SV=1	PREDICTED: histone deacetylase HDT1-like [Beta vulgaris subsp. vulgaris]
c1195.graph_c0	--	--	Molecular Function: binding (GO:0005488);;	--	[R]	General function prediction only	--	--	PREDICTED: uncharacterized protein LOC104902860 [Beta vulgaris subsp. vulgaris]
c33886.graph_c0	--	--	--	--	[S]	Function unknown	Bucentaur or craniofacial development	--	PREDICTED: craniofacial development protein 1 isoform X1 [Beta vulgaris subsp. vulgaris]
c65885.graph_c0	--	--	--	--	--	--	--	--	PREDICTED: uncharacterized protein LOC104907559 [Beta vulgaris subsp. vulgaris]
c4744.graph_c0	--	--	--	--	[Z]	Cytoskeleton	Nebulin repeat	--	--
c30190.graph_c0	[O]	Posttranslational modification, protein turnover, chaperones	Cellular Component: cytoplasm (GO:0005737);; Biological Process: protein folding (GO:0006457);;	--	[O]	Posttranslational modification, protein turnover, chaperones	Chaperonin 10 Kd subunit	20 kDa chaperonin, chloroplastic (Precursor) GN=T1M15.120 OS=Arabidopsis thaliana (Mouse-ear cress) PE=1 SV=2	PREDICTED: 20 kDa chaperonin, chloroplastic [Beta vulgaris subsp. vulgaris]
c30864.graph_c0	--	--	--	--	--	--	RCD1-SRO-TAF4 (RST) plant domain;; Poly(ADP-ribose) polymerase catalytic domain	Inactive poly [ADP-ribose] polymerase RCD1 GN=F3C3.1 OS=Arabidopsis thaliana (Mouse-ear cress) PE=1 SV=1	PREDICTED: inactive poly [ADP-ribose] polymerase RCD1-like [Beta vulgaris subsp. vulgaris]
c33824.graph_c2	[BQ]	--	Cellular Component: nucleus (GO:0005634);; Biological Process: regulation of transcription, DNA-templated (GO:0006355);; Biological Process: response to salt stress (GO:0009651);; Biological Process: response to abscisic acid (GO:0009737);; Cellular Component: chloroplast envelope (GO:0009941);; Biological Process: posttranscriptional gene silencing (GO:0016441);; Molecular Function: NAD-dependen…	K06067|1e-63|vvi:100244903|similar to HDA6 (HISTONE DEACETYLASE 6)	[B]	Chromatin structure and dynamics	--	Histone deacetylase 6 GN=MDC12.7 OS=Arabidopsis thaliana (Mouse-ear cress) PE=1 SV=1	PREDICTED: histone deacetylase 6 [Beta vulgaris subsp. vulgaris]
c26219.graph_c0	--	--	--	--	--	--	--	--	PREDICTED: uncharacterized protein LOC103494601 [Cucumis melo]
c51548.graph_c0	--	--	--	--	--	--	--	L-type lectin-domain containing receptor kinase I.3 (Precursor) GN=F18N11.170 OS=Arabidopsis thaliana (Mouse-ear cress) PE=1 SV=1	--
c34993.graph_c0	--	--	--	K14001|1e-156|vvi:100266149|hypothetical protein LOC100266149	[O]	Posttranslational modification, protein turnover, chaperones	Nucleotide exchange factor Fes1;; Armadillo/beta-catenin-like repeat;; HEAT-like repeat	--	PREDICTED: hsp70 nucleotide exchange factor FES1 isoform X1 [Beta vulgaris subsp. vulgaris]
c28645.graph_c1	--	--	--	--	--	--	--	--	PREDICTED: probable cyclin-dependent serine/threonine-protein kinase DDB_G0292550 [Beta vulgaris subsp. vulgaris]
c43520.graph_c0	[R]	General function prediction only	Biological Process: response to hypoxia (GO:0001666);; Molecular Function: oxygen transporter activity (GO:0005344);; Molecular Function: iron ion binding (GO:0005506);; Biological Process: response to auxin (GO:0009733);; Biological Process: oxygen transport (GO:0015671);; Molecular Function: oxygen binding (GO:0019825);; Molecular Function: heme binding (GO:0020037);;	--	--	--	Bacterial-like globin	Two-on-two hemoglobin-3 GN=GLB3 OS=Arabidopsis thaliana (Mouse-ear cress) PE=1 SV=1	two-on-two hemoglobin-3 [Beta vulgaris subsp. vulgaris]
c37488.graph_c0	--	--	Molecular Function: alpha-1,3-mannosyltransferase activity (GO:0000033);; Cellular Component: endoplasmic reticulum (GO:0005783);; Biological Process: protein glycosylation (GO:0006486);; Cellular Component: integral component of membrane (GO:0016021);; Biological Process: cellulose biosynthetic process (GO:0030244);; Biological Process: Golgi vesicle transport (GO:0048193);;	K03845|1e-146|rcu:RCOM_1439850|Dolichyl-P-Man:Man(5)GlcNAc(2)-PP-dolichyl mannosyltransferase, putative	[G]	Carbohydrate transport and metabolism	ALG3 protein;; ALG3 protein;; ALG3 protein	Dol-P-Man:Man(5)GlcNAc(2)-PP-Dol alpha-1,3-mannosyltransferase GN=ALG3 OS=Arabidopsis thaliana (Mouse-ear cress) PE=1 SV=1	PREDICTED: dol-P-Man:Man(5)GlcNAc(2)-PP-Dol alpha-1,3-mannosyltransferase [Beta vulgaris subsp. vulgaris]
c18346.graph_c0	[I]	Lipid transport and metabolism	Biological Process: lipid metabolic process (GO:0006629);; Molecular Function: oxidoreductase activity, acting on paired donors, with oxidation of a pair of donors resulting in the reduction of molecular oxygen to two molecules of water (GO:0016717);; Biological Process: oxidation-reduction process (GO:0055114);;	K10256|0.0|rcu:RCOM_0503360|omega-6 desaturase, endoplasmic reticulum (EC:1.14.99.33)	--	--	Fatty acid desaturase;; Domain of unknown function (DUF3474)	Omega-6 fatty acid desaturase, endoplasmic reticulum isozyme 2 GN=FAD2-2 OS=Glycine max (Soybean) PE=2 SV=1	delta-12 desaturase [Spinacia oleracea]
c54205.graph_c0	--	--	--	--	[R]	General function prediction only	--	--	PREDICTED: uncharacterized protein LOC104885277 [Beta vulgaris subsp. vulgaris]
c21165.graph_c0	--	--	Cellular Component: plastid (GO:0009536);; Biological Process: response to metal ion (GO:0010038);; Molecular Function: glutathione gamma-glutamylcysteinyltransferase activity (GO:0016756);; Molecular Function: metal ion binding (GO:0046872);; Biological Process: phytochelatin biosynthetic process (GO:0046938);;	--	[P]	Inorganic ion transport and metabolism	--	Glutathione gamma-glutamylcysteinyltransferase 3 GN=PCS3 OS=Lotus japonicus (Lotus corniculatus var. japonicus) PE=2 SV=1	phytochelatin synthase [Suaeda salsa]
c35325.graph_c1	--	--	--	--	--	--	--	Uncharacterized protein At5g23160 GN=At5g23160 OS=Arabidopsis thaliana (Mouse-ear cress) PE=2 SV=1	PREDICTED: uncharacterized protein At5g23160 [Beta vulgaris subsp. vulgaris]
c36338.graph_c0	--	--	Molecular Function: sequence-specific DNA binding transcription factor activity (GO:0003700);; Biological Process: regulation of transcription, DNA-templated (GO:0006355);; Biological Process: response to xenobiotic stimulus (GO:0009410);; Biological Process: regulation of flower development (GO:0009909);; Biological Process: endoplasmic reticulum unfolded protein response (GO:0030968);; Molecula…	K14431|1e-180|vvi:100249239|hypothetical protein LOC100249239	--	--	Seed dormancy control;; bZIP transcription factor;; Basic region leucine zipper	Transcription factor PERIANTHIA GN=PAN OS=Arabidopsis thaliana (Mouse-ear cress) PE=1 SV=1	PREDICTED: transcription factor TGA2-like [Beta vulgaris subsp. vulgaris]
c53867.graph_c0	--	--	--	--	--	--	Plant mobile domain	--	PREDICTED: serine/threonine-protein phosphatase 7 long form homolog [Beta vulgaris subsp. vulgaris]
c25583.graph_c1	--	--	--	--	[Z]	Cytoskeleton	--	--	PREDICTED: IST1 homolog isoform X2 [Beta vulgaris subsp. vulgaris]
c37237.graph_c0	--	--	Molecular Function: nucleic acid binding (GO:0003676);; Molecular Function: hydrolase activity (GO:0016787);; Biological Process: primary metabolic process (GO:0044238);; Biological Process: organic substance metabolic process (GO:0071704);;	--	[L]	Replication, recombination and repair	Domain of unknown function (DUF4413);; hAT family C-terminal dimerisation region	Putative AC transposase OS=Zea mays (Maize) PE=2 SV=2	PREDICTED: zinc finger BED domain-containing protein RICESLEEPER 2-like [Beta vulgaris subsp. vulgaris]
c58094.graph_c0	--	--	--	--	--	--	--	--	PREDICTED: uncharacterized protein LOC104901388 [Beta vulgaris subsp. vulgaris]
c37969.graph_c0	--	--	--	--	[T]	Signal transduction mechanisms	--	Vegetative cell wall protein gp1 (Precursor) GN=GP1 OS=Chlamydomonas reinhardtii (Chlamydomonas smithii) PE=1 SV=1	hypothetical protein EMIHUDRAFT_433316 [Emiliania huxleyi CCMP1516]
c37262.graph_c0	[KL]	--	--	--	[L]	Replication, recombination and repair	SNF2 family N-terminal domain;; Helicase conserved C-terminal domain;; Type III restriction enzyme, res subunit;; Protein tyrosine kinase;; Protein kinase domain	SNF2 domain-containing protein CLASSY 4 GN=At3g24340 OS=Arabidopsis thaliana (Mouse-ear cress) PE=1 SV=1	PREDICTED: SNF2 domain-containing protein CLASSY 4-like [Beta vulgaris subsp. vulgaris]
c41167.graph_c0	[I]	Lipid transport and metabolism	Molecular Function: catalytic activity (GO:0003824);; Biological Process: metabolic process (GO:0008152);;	K01692|0.0|rcu:RCOM_0926260|3-hydroxybutyryl-CoA dehydratase, putative (EC:4.2.1.17)	[I]	Lipid transport and metabolism	2-enoyl-CoA Hydratase C-terminal region;; Enoyl-CoA hydratase/isomerase family;; Snf7	3-hydroxyisobutyryl-CoA hydrolase-like protein 3, mitochondrial (Precursor) GN=At4g13360 OS=Arabidopsis thaliana (Mouse-ear cress) PE=2 SV=2	PREDICTED: 3-hydroxyisobutyryl-CoA hydrolase-like protein 3, mitochondrial isoform X1 [Beta vulgaris subsp. vulgaris]
c30677.graph_c0	--	--	--	--	[P]	Inorganic ion transport and metabolism	--	Putative proline-rich receptor-like protein kinase PERK6 GN=PERK6 OS=Arabidopsis thaliana (Mouse-ear cress) PE=2 SV=2	PREDICTED: uncharacterized protein DDB_G0283357 [Beta vulgaris subsp. vulgaris]
c20920.graph_c0	[K]	Transcription	Biological Process: RNA splicing, via endonucleolytic cleavage and ligation (GO:0000394);; Biological Process: nuclear-transcribed mRNA catabolic process (GO:0000956);; Molecular Function: DNA binding (GO:0003677);; Molecular Function: DNA-directed RNA polymerase activity (GO:0003899);; Cellular Component: DNA-directed RNA polymerase II, core complex (GO:0005665);; Cellular Component: cytosol (GO…	K03010|0.0|rcu:RCOM_0936370|DNA-directed RNA polymerase II subunit, putative	[K]	Transcription	RNA polymerase Rpb2, domain 6;; RNA polymerase beta subunit;; RNA polymerase Rpb2, domain 2;; RNA polymerase Rpb2, domain 7;; RNA polymerase Rpb2, domain 4;; RNA polymerase Rpb2, domain 3;; RNA polymerase Rpb2, domain 5	DNA-directed RNA polymerase II subunit RPB2 GN=RPB2 OS=Solanum lycopersicum (Tomato) PE=2 SV=1	PREDICTED: DNA-directed RNA polymerase II subunit RPB2 [Beta vulgaris subsp. vulgaris]
c41452.graph_c0	[RTKL]	--	Biological Process: cytokinesis by cell plate formation (GO:0000911);; Molecular Function: protein serine/threonine kinase activity (GO:0004674);; Molecular Function: ATP binding (GO:0005524);; Cellular Component: nucleus (GO:0005634);; Cellular Component: cytosol (GO:0005829);; Cellular Component: plasma membrane (GO:0005886);; Biological Process: protein phosphorylation (GO:0006468);; Biologica…	--	[T]	Signal transduction mechanisms	Protein kinase domain;; Protein tyrosine kinase;; NAF domain;; Kinase-like	CBL-interacting serine/threonine-protein kinase 23 GN=At1g30270 OS=Arabidopsis thaliana (Mouse-ear cress) PE=1 SV=1	PREDICTED: CBL-interacting serine/threonine-protein kinase 23 [Beta vulgaris subsp. vulgaris]
c24581.graph_c0	--	--	Molecular Function: transporter activity (GO:0005215);; Biological Process: transport (GO:0006810);; Cellular Component: membrane (GO:0016020);;	--	[E]	Amino acid transport and metabolism	--	Protein NRT1/ PTR FAMILY 3.1 GN=F24J5.19 OS=Arabidopsis thaliana (Mouse-ear cress) PE=2 SV=1	PREDICTED: protein NRT1/ PTR FAMILY 3.1-like [Beta vulgaris subsp. vulgaris]
c16568.graph_c0	--	--	--	--	[A]	RNA processing and modification	RING-variant domain	Probable E3 ubiquitin ligase SUD1 GN=F28A23.140 OS=Arabidopsis thaliana (Mouse-ear cress) PE=1 SV=1	PREDICTED: uncharacterized protein LOC104883546 [Beta vulgaris subsp. vulgaris]
c71483.graph_c0	[J]	Translation, ribosomal structure and biogenesis	Cellular Component: ribosome (GO:0005840);;	K02984|2e-36|cre:CHLREDRAFT_168484|RPS3a	[J]	Translation, ribosomal structure and biogenesis	Ribosomal S3Ae family	40S ribosomal protein S3a {ECO:0000255|HAMAP-Rule:MF_03122} GN=CHLREDRAFT_168484 OS=Chlamydomonas reinhardtii (Chlamydomonas smithii) PE=1 SV=1	predicted protein [Hordeum vulgare subsp. vulgare]
c33393.graph_c2	--	--	--	--	--	--	Cotton fibre expressed protein	Formin-like protein 5 GN=P0453E05.107 OS=Oryza sativa subsp. japonica (Rice) PE=2 SV=2	PREDICTED: formin-like protein 20 [Beta vulgaris subsp. vulgaris]
c23647.graph_c0	[C]	Energy production and conversion	Molecular Function: phosphoenolpyruvate carboxykinase (ATP) activity (GO:0004612);; Molecular Function: ATP binding (GO:0005524);; Biological Process: gluconeogenesis (GO:0006094);;	K01610|0.0|rcu:RCOM_1584090|Phosphoenolpyruvate carboxykinase [ATP], putative (EC:4.1.1.49)	--	--	Phosphoenolpyruvate carboxykinase	Phosphoenolpyruvate carboxykinase [ATP] GN=PCKA OS=Arabidopsis thaliana (Mouse-ear cress) PE=1 SV=1	PREDICTED: phosphoenolpyruvate carboxykinase [ATP] [Beta vulgaris subsp. vulgaris]
c12128.graph_c0	[RTKL]	--	--	K06228|0.0|vvi:100257868|hypothetical protein LOC100257868	--	--	Protein kinase domain;; Protein tyrosine kinase;; HEAT repeats;; Armadillo/beta-catenin-like repeat;; HEAT-like repeat;; HEAT repeat	Serine/threonine-protein kinase TIO GN=F14I3.15 OS=Arabidopsis thaliana (Mouse-ear cress) PE=1 SV=1	PREDICTED: serine/threonine-protein kinase TIO [Beta vulgaris subsp. vulgaris]
c23363.graph_c0	--	--	--	--	--	--	VQ motif	Protein MKS1 GN=MKS1 OS=Arabidopsis thaliana (Mouse-ear cress) PE=1 SV=2	PREDICTED: protein MKS1 [Beta vulgaris subsp. vulgaris]
c31502.graph_c0	--	--	--	--	[R]	General function prediction only	PPR repeat family;; PPR repeat;; PPR repeat;; Pentatricopeptide repeat domain;; ANTH domain	Pentatricopeptide repeat-containing protein At2g36980, mitochondrial (Precursor) GN=PCMP-E73 OS=Arabidopsis thaliana (Mouse-ear cress) PE=2 SV=1	PREDICTED: pentatricopeptide repeat-containing protein At2g36980, mitochondrial [Vitis vinifera]
c34661.graph_c0	--	--	Cellular Component: photosystem I (GO:0009522);; Cellular Component: photosystem II (GO:0009523);; Cellular Component: chloroplast thylakoid membrane (GO:0009535);; Biological Process: photosynthesis, light harvesting (GO:0009765);; Cellular Component: integral component of membrane (GO:0016021);; Molecular Function: chlorophyll binding (GO:0016168);; Biological Process: protein-chromophore linka…	K08913|1e-118|rcu:RCOM_0483250|chlorophyll A/B binding protein, putative	--	--	Chlorophyll A-B binding protein	Chlorophyll a-b binding protein 4, chloroplastic (Precursor) GN=CAB4 OS=Solanum lycopersicum (Tomato) PE=2 SV=1	chlorophyll a/b binding protein [Amaranthus hypochondriacus]
c18542.graph_c0	--	--	--	--	--	--	--	--	PREDICTED: uncharacterized protein LOC104894361 [Beta vulgaris subsp. vulgaris]
c53269.graph_c0	--	--	--	--	--	--	SWIM zinc finger	--	PREDICTED: uncharacterized protein LOC104903315 [Beta vulgaris subsp. vulgaris]
c11402.graph_c0	[RTKL]	--	Biological Process: MAPK cascade (GO:0000165);; Molecular Function: MAP kinase activity (GO:0004707);; Molecular Function: ATP binding (GO:0005524);; Cellular Component: cytoplasm (GO:0005737);; Biological Process: protein phosphorylation (GO:0006468);; Biological Process: cortical microtubule organization (GO:0043622);;	--	[T]	Signal transduction mechanisms	Protein kinase domain;; Protein tyrosine kinase;; Lipopolysaccharide kinase (Kdo/WaaP) family	Mitogen-activated protein kinase 18 GN=MPK18 OS=Arabidopsis thaliana (Mouse-ear cress) PE=1 SV=4	PREDICTED: mitogen-activated protein kinase 19 [Beta vulgaris subsp. vulgaris]
c32993.graph_c0	[S]	Function unknown	Molecular Function: DNA binding (GO:0003677);; Molecular Function: nuclease activity (GO:0004518);; Biological Process: nucleotide-excision repair (GO:0006289);; Biological Process: nucleic acid phosphodiester bond hydrolysis (GO:0090305);;	--	--	--	Hemimethylated DNA-binding protein YccV like;; UvrB/uvrC motif	--	PREDICTED: uncharacterized protein LOC104883422 [Beta vulgaris subsp. vulgaris]
c35575.graph_c0	--	--	--	--	[S]	Function unknown	Regulator of chromosome condensation (RCC1) repeat;; Regulator of chromosome condensation (RCC1) repeat	Ultraviolet-B receptor UVR8 GN=UVR8 OS=Arabidopsis thaliana (Mouse-ear cress) PE=1 SV=1	PREDICTED: ultraviolet-B receptor UVR8 [Beta vulgaris subsp. vulgaris]
c36796.graph_c0	--	--	--	--	--	--	--	Uncharacterized membrane protein At3g27390 GN=At3g27390 OS=Arabidopsis thaliana (Mouse-ear cress) PE=1 SV=2	PREDICTED: uncharacterized membrane protein At3g27390 [Beta vulgaris subsp. vulgaris]
c52178.graph_c0	--	--	--	--	--	--	F-box domain	F-box/FBD/LRR-repeat protein At4g26340 GN=At4g26340 OS=Arabidopsis thaliana (Mouse-ear cress) PE=2 SV=1	PREDICTED: F-box/FBD/LRR-repeat protein At5g56420-like [Beta vulgaris subsp. vulgaris]
c21865.graph_c0	--	--	Molecular Function: monooxygenase activity (GO:0004497);; Molecular Function: iron ion binding (GO:0005506);; Cellular Component: plasma membrane (GO:0005886);; Molecular Function: electron carrier activity (GO:0009055);; Molecular Function: oxidoreductase activity, acting on paired donors, with incorporation or reduction of molecular oxygen (GO:0016705);; Molecular Function: oxygen binding (GO:0…	--	[Q]	Secondary metabolites biosynthesis, transport and catabolism	Cytochrome P450	Cytochrome P450 77A4 GN=CYP77A4 OS=Arabidopsis thaliana (Mouse-ear cress) PE=2 SV=1	PREDICTED: cytochrome P450 77A4 [Beta vulgaris subsp. vulgaris]
c36472.graph_c0	[O]	Posttranslational modification, protein turnover, chaperones	Cellular Component: ubiquitin ligase complex (GO:0000151);; Cellular Component: cytosol (GO:0005829);; Biological Process: ubiquitin-dependent protein catabolic process (GO:0006511);; Biological Process: glucuronoxylan metabolic process (GO:0010413);; Biological Process: protein ubiquitination (GO:0016567);; Molecular Function: ubiquitin-ubiquitin ligase activity (GO:0034450);; Biological Process…	K10597|0.0|rcu:RCOM_0169100|ubiquitin-protein ligase, putative	[O]	Posttranslational modification, protein turnover, chaperones	Ubiquitin elongating factor core;; U-box domain	Probable ubiquitin conjugation factor E4 GN=T20K14_10 OS=Arabidopsis thaliana (Mouse-ear cress) PE=2 SV=1	PREDICTED: probable ubiquitin conjugation factor E4 [Beta vulgaris subsp. vulgaris]
c66610.graph_c0	--	--	--	--	--	--	--	--	PREDICTED: uncharacterized protein LOC104897185 [Beta vulgaris subsp. vulgaris]
c20328.graph_c0	--	--	Molecular Function: DNA binding (GO:0003677);; Cellular Component: nucleus (GO:0005634);; Biological Process: regulation of transcription, DNA-templated (GO:0006355);; Biological Process: response to water deprivation (GO:0009414);; Biological Process: response to abscisic acid (GO:0009737);;	--	--	--	No apical meristem (NAM) protein	NAC domain-containing protein 72 GN=F27G19.10 OS=Arabidopsis thaliana (Mouse-ear cress) PE=2 SV=1	putative NAC transcription factor [Suaeda liaotungensis]
c37582.graph_c0	--	--	--	--	[R]	General function prediction only	Leucine Rich repeats (2 copies);; Leucine Rich repeat;; Leucine rich repeat;; Leucine Rich Repeat	Leucine-rich repeat receptor-like serine/threonine-protein kinase BAM2 (Precursor) GN=BAM2 OS=Arabidopsis thaliana (Mouse-ear cress) PE=1 SV=1	PREDICTED: F-box/LRR-repeat protein 14 [Beta vulgaris subsp. vulgaris]
c11404.graph_c1	--	--	--	--	--	--	LSD1 zinc finger	Protein LSD1 GN=OsJ_26122 OS=Oryza sativa subsp. japonica (Rice) PE=2 SV=1	PREDICTED: protein LOL1 [Beta vulgaris subsp. vulgaris]
c27782.graph_c0	[J]	Translation, ribosomal structure and biogenesis	Biological Process: RNA methylation (GO:0001510);; Molecular Function: structural constituent of ribosome (GO:0003735);; Cellular Component: nucleolus (GO:0005730);; Biological Process: translation (GO:0006412);; Biological Process: embryo development ending in seed dormancy (GO:0009793);; Biological Process: protein ubiquitination (GO:0016567);; Cellular Component: cytosolic large ribosomal subu…	K02927|1e-45|vvi:100246002|similar to ubiquitin fusion protein	[J]	Translation, ribosomal structure and biogenesis	Ribosomal L40e family;; Ubiquitin family	60S ribosomal protein L40 (Precursor) GN=UBICEP52-7 OS=Nicotiana sylvestris (Wood tobacco) PE=2 SV=2	PREDICTED: ubiquitin-60S ribosomal protein L40-like [Beta vulgaris subsp. vulgaris]
c57322.graph_c0	--	--	--	--	--	--	Chromo (CHRromatin Organisation MOdifier) domain	--	PREDICTED: uncharacterized protein LOC104895273 [Beta vulgaris subsp. vulgaris]
c40864.graph_c1	--	--	--	--	--	--	--	--	PREDICTED: uncharacterized protein LOC104907040 [Beta vulgaris subsp. vulgaris]
c30878.graph_c0	--	--	--	--	--	--	GDSL/SGNH-like Acyl-Esterase family found in Pmr5 and Cas1p;; PMR5 N terminal Domain;; GDSL/SGNH-like Acyl-Esterase family found in Pmr5 and Cas1p	Protein trichome birefringence-like 5 GN=TBL5 OS=Arabidopsis thaliana (Mouse-ear cress) PE=2 SV=1	PREDICTED: protein trichome birefringence-like 5 [Beta vulgaris subsp. vulgaris]
c73887.graph_c0	--	--	--	--	[K]	Transcription	K-box region	MADS-box transcription factor 27 GN=B1267B06.20 OS=Oryza sativa subsp. japonica (Rice) PE=2 SV=2	PREDICTED: MADS-box transcription factor 23-like [Beta vulgaris subsp. vulgaris]
c35431.graph_c1	[RTKL]	--	--	--	--	--	Wall-associated receptor kinase galacturonan-binding;; Protein kinase domain;; Protein tyrosine kinase;; Calcium-binding EGF domain;; Complement Clr-like EGF-like;; EGF-like domain;; Human growth factor-like EGF;; Protein tyrosine kinase;; Protein kinase domain	Wall-associated receptor kinase 2 (Precursor) GN=WAK2 OS=Arabidopsis thaliana (Mouse-ear cress) PE=1 SV=1	PREDICTED: wall-associated receptor kinase 2-like [Beta vulgaris subsp. vulgaris]
c11574.graph_c0	--	--	Biological Process: sucrose biosynthetic process (GO:0005986);; Molecular Function: sucrose-phosphate synthase activity (GO:0046524);;	K00696|1e-106|vvi:100241955|hypothetical protein LOC100241955	[M]	Cell wall/membrane/envelope biogenesis	--	Probable sucrose-phosphate synthase GN=SPS OS=Beta vulgaris (Sugar beet) PE=2 SV=1	probable sucrose-phosphate synthase [Beta vulgaris subsp. vulgaris]
c42621.graph_c0	--	--	--	--	--	--	--	Zinc-finger homeodomain protein 1 OS=Oryza sativa subsp. japonica (Rice) PE=2 SV=1	PREDICTED: zinc-finger homeodomain protein 1-like [Beta vulgaris subsp. vulgaris]
c22239.graph_c0	--	--	--	--	--	--	SAM dependent carboxyl methyltransferase	Caffeine synthase 1 GN=TCS1 OS=Camellia sinensis (Tea) PE=1 SV=1	PREDICTED: caffeine synthase 1-like [Beta vulgaris subsp. vulgaris]
c56860.graph_c0	--	--	--	--	--	--	--	--	PREDICTED: uncharacterized protein LOC101506213 [Cicer arietinum]
c42436.graph_c0	[S]	Function unknown	--	--	--	--	Mitochondrial biogenesis AIM24	--	PREDICTED: uncharacterized protein LOC104884135 [Beta vulgaris subsp. vulgaris]
c12408.graph_c0	--	--	Biological Process: RNA splicing, via endonucleolytic cleavage and ligation (GO:0000394);; Cellular Component: plasma membrane (GO:0005886);; Biological Process: methionine biosynthetic process (GO:0009086);;	--	--	--	--	--	PREDICTED: uncharacterized protein LOC104896217 [Beta vulgaris subsp. vulgaris]
c11442.graph_c0	--	--	Molecular Function: SNAP receptor activity (GO:0005484);; Cellular Component: nucleus (GO:0005634);; Cellular Component: plasma membrane (GO:0005886);;	K08504|1e-68|vvi:100266980|hypothetical protein LOC100266980	[U]	Intracellular trafficking, secretion, and vesicular transport	SNARE domain	Bet1-like SNARE 1-1 GN=BET11 OS=Arabidopsis thaliana (Mouse-ear cress) PE=1 SV=1	PREDICTED: bet1-like SNARE 1-1 [Beta vulgaris subsp. vulgaris]
c40428.graph_c0	--	--	--	--	--	--	MULE transposase domain	Protein FAR1-RELATED SEQUENCE 5 GN=FRS5 OS=Arabidopsis thaliana (Mouse-ear cress) PE=2 SV=1	PREDICTED: protein FAR-RED ELONGATED HYPOCOTYL 3-like [Beta vulgaris subsp. vulgaris]
c31105.graph_c0	[R]	General function prediction only	Cellular Component: endoplasmic reticulum membrane (GO:0005789);; Biological Process: GPI anchor biosynthetic process (GO:0006506);; Molecular Function: sulfuric ester hydrolase activity (GO:0008484);; Molecular Function: transferase activity (GO:0016740);;	K05285|0.0|rcu:RCOM_0852450|GPI ethanolamine phosphate transferase, putative	[T]	Signal transduction mechanisms	Phosphatidylinositolglycan class N (PIG-N);; Type I phosphodiesterase / nucleotide pyrophosphatase;; Sulfatase;; Metalloenzyme superfamily	--	PREDICTED: GPI ethanolamine phosphate transferase 1 isoform X2 [Beta vulgaris subsp. vulgaris]
c27549.graph_c0	--	--	--	--	--	--	--	Cysteine-rich receptor-like protein kinase 6 (Precursor) OS=Arabidopsis thaliana (Mouse-ear cress) PE=1 SV=1	PREDICTED: cysteine-rich receptor-like protein kinase 15 [Beta vulgaris subsp. vulgaris]
c23491.graph_c0	[RTKL]	--	Biological Process: respiratory burst involved in defense response (GO:0002679);; Biological Process: cell surface pattern recognition receptor signaling pathway (GO:0002752);; Molecular Function: protein serine/threonine kinase activity (GO:0004674);; Molecular Function: non-membrane spanning protein tyrosine kinase activity (GO:0004715);; Molecular Function: ATP binding (GO:0005524);; Cellular …	--	--	--	Protein tyrosine kinase;; Protein kinase domain	Chitin elicitor receptor kinase 1 (Precursor) GN=MIL23.20 OS=Arabidopsis thaliana (Mouse-ear cress) PE=1 SV=1	Chitin elicitor receptor kinase 1, RLK1 isoform 1 [Theobroma cacao]
c14884.graph_c0	--	--	--	--	--	--	Putative S-adenosyl-L-methionine-dependent methyltransferase	Probable methyltransferase PMT23 GN=At2g40280 OS=Arabidopsis thaliana (Mouse-ear cress) PE=2 SV=2	PREDICTED: probable methyltransferase PMT23 [Beta vulgaris subsp. vulgaris]
c12250.graph_c0	--	--	Molecular Function: copper ion binding (GO:0005507);; Biological Process: amine metabolic process (GO:0009308);; Cellular Component: chloroplast (GO:0009507);; Molecular Function: quinone binding (GO:0048038);;	--	--	--	Protein of unknown function (DUF3223)	Protein DCL, chloroplastic (Precursor) GN=DCL OS=Solanum lycopersicum (Tomato) PE=2 SV=1	PREDICTED: protein DCL, chloroplastic [Beta vulgaris subsp. vulgaris]
c18191.graph_c0	[I]	Lipid transport and metabolism	Molecular Function: carboxylic ester hydrolase activity (GO:0052689);;	--	[V]	Defense mechanisms	alpha/beta hydrolase fold;; Carboxylesterase family	Probable carboxylesterase 7 GN=CXE7 OS=Arabidopsis thaliana (Mouse-ear cress) PE=2 SV=1	PREDICTED: probable carboxylesterase 7 [Beta vulgaris subsp. vulgaris]
c36400.graph_c0	--	--	Molecular Function: RNA binding (GO:0003723);; Molecular Function: RNA-directed DNA polymerase activity (GO:0003964);; Biological Process: RNA-dependent DNA replication (GO:0006278);; Molecular Function: zinc ion binding (GO:0008270);; Biological Process: DNA integration (GO:0015074);;	--	--	--	--	--	PREDICTED: uncharacterized protein LOC104899464 [Beta vulgaris subsp. vulgaris]
c20382.graph_c0	--	--	Biological Process: regulation of gene expression (GO:0010468);; Biological Process: cellular macromolecule metabolic process (GO:0044260);; Biological Process: nucleic acid metabolic process (GO:0090304);;	--	[K]	Transcription	--	DNA-directed RNA polymerase V subunit 1 GN=At2g40030 OS=Arabidopsis thaliana (Mouse-ear cress) PE=1 SV=1	kow domain-containing transcription factor 1 [Arabidopsis thaliana]
c19732.graph_c0	--	--	Molecular Function: peroxidase activity (GO:0004601);; Cellular Component: extracellular region (GO:0005576);; Biological Process: response to oxidative stress (GO:0006979);; Molecular Function: heme binding (GO:0020037);; Molecular Function: metal ion binding (GO:0046872);; Biological Process: oxidation-reduction process (GO:0055114);;	K00430|5e-58|rcu:RCOM_1497830|Peroxidase 66 precursor, putative (EC:1.11.1.7)	--	--	Peroxidase	Peroxidase 66 (Precursor) GN=MJM18.4 OS=Arabidopsis thaliana (Mouse-ear cress) PE=2 SV=1	PREDICTED: peroxidase 66-like [Beta vulgaris subsp. vulgaris]
c1482.graph_c0	[Q]	Secondary metabolites biosynthesis, transport and catabolism	Molecular Function: iron ion binding (GO:0005506);; Cellular Component: endoplasmic reticulum (GO:0005783);; Molecular Function: electron carrier activity (GO:0009055);; Molecular Function: heme binding (GO:0020037);; Biological Process: oxidation-reduction process (GO:0055114);; Molecular Function: aromatase activity (GO:0070330);;	--	[QI]	--	Cytochrome P450	Cytochrome P450 704C1 GN=CYP704C1 OS=Pinus taeda (Loblolly pine) PE=2 SV=1	PREDICTED: cytochrome P450 704C1 [Beta vulgaris subsp. vulgaris]
c26768.graph_c0	--	--	--	--	--	--	--	--	PREDICTED: uncharacterized protein LOC104904841 [Beta vulgaris subsp. vulgaris]
c37426.graph_c0	[O]	Posttranslational modification, protein turnover, chaperones	Biological Process: maltose metabolic process (GO:0000023);; Biological Process: phosphatidylglycerol biosynthetic process (GO:0006655);; Biological Process: leaf morphogenesis (GO:0009965);; Biological Process: thylakoid membrane organization (GO:0010027);; Biological Process: carotenoid biosynthetic process (GO:0016117);; Biological Process: mRNA modification (GO:0016556);; Biological Process: …	K07399|0.0|vvi:100265915|hypothetical protein LOC100265915	--	--	ResB-like family	Cytochrome c biogenesis protein CCS1, chloroplastic (Precursor) GN=CCS1 OS=Arabidopsis thaliana (Mouse-ear cress) PE=1 SV=1	PREDICTED: cytochrome c biogenesis protein CCS1, chloroplastic [Beta vulgaris subsp. vulgaris]
c55581.graph_c0	--	--	--	--	--	--	--	--	PREDICTED: uncharacterized protein LOC104887215 [Beta vulgaris subsp. vulgaris]
c69349.graph_c0	--	--	--	--	--	--	--	--	PREDICTED: uncharacterized protein LOC104429841 [Eucalyptus grandis]
c10.graph_c0	--	--	--	--	--	--	--	--	PREDICTED: O-glucosyltransferase rumi homolog [Beta vulgaris subsp. vulgaris]
c65291.graph_c0	--	--	--	--	--	--	--	--	PREDICTED: uncharacterized protein LOC104907559 [Beta vulgaris subsp. vulgaris]
c23502.graph_c0	--	--	--	--	[Z]	Cytoskeleton	--	Tubulin alpha chain (Fragment) GN=TUBA OS=Picea abies (Norway spruce) PE=2 SV=1	alpha-tubulin, partial [Pinus balfouriana]
c43615.graph_c0	--	--	Molecular Function: DNA binding (GO:0003677);; Molecular Function: sequence-specific DNA binding transcription factor activity (GO:0003700);; Cellular Component: nucleus (GO:0005634);; Biological Process: regulation of transcription, DNA-templated (GO:0006355);; Biological Process: ethylene-activated signaling pathway (GO:0009873);;	--	--	--	AP2 domain	Ethylene-responsive transcription factor 12 GN=F3M18.21 OS=Arabidopsis thaliana (Mouse-ear cress) PE=2 SV=1	PREDICTED: ethylene-responsive transcription factor 12 [Beta vulgaris subsp. vulgaris]
c59349.graph_c0	[J]	Translation, ribosomal structure and biogenesis	Molecular Function: translation initiation factor activity (GO:0003743);; Molecular Function: GTPase activity (GO:0003924);; Molecular Function: GTP binding (GO:0005525);; Biological Process: GTP catabolic process (GO:0006184);; Biological Process: translational initiation (GO:0006413);;	K03242|7e-67|rcu:RCOM_0727700|eukaryotic translation initiation factor 2 gamma subunit, putative	[J]	Translation, ribosomal structure and biogenesis	Initiation factor eIF2 gamma, C terminal	--	eukaryotic translation initiation factor 2 gamma subunit, putative [Ricinus communis]
c59316.graph_c0	--	--	Molecular Function: hydrolase activity (GO:0016787);;	--	--	--	GDSL-like Lipase/Acylhydrolase	GDSL esterase/lipase At1g71250 (Precursor) GN=At1g71250 OS=Arabidopsis thaliana (Mouse-ear cress) PE=2 SV=1	PREDICTED: GDSL esterase/lipase At5g08460 [Beta vulgaris subsp. vulgaris]
c58224.graph_c0	--	--	--	--	[R]	General function prediction only	Ankyrin repeats (many copies);; Domain of unknown function;; Ankyrin repeats (many copies);; Ankyrin repeats (3 copies);; Ankyrin repeat;; Ankyrin repeat	Ankyrin repeat-containing protein At5g02620 GN=At5g02620 OS=Arabidopsis thaliana (Mouse-ear cress) PE=1 SV=1	PREDICTED: ankyrin repeat-containing protein At5g02620-like [Beta vulgaris subsp. vulgaris]
c33541.graph_c0	--	--	--	--	[O]	Posttranslational modification, protein turnover, chaperones	Ring finger domain;; RING-H2 zinc finger;; Zinc finger, C3HC4 type (RING finger)	E3 ubiquitin-protein ligase ATL6 (Precursor) GN=ATL6 OS=Arabidopsis thaliana (Mouse-ear cress) PE=1 SV=2	PREDICTED: E3 ubiquitin-protein ligase ATL6-like [Beta vulgaris subsp. vulgaris]
c76445.graph_c0	--	--	Molecular Function: hydrolase activity (GO:0016787);;	--	--	--	Glycosyl hydrolases family 28	Exopolygalacturonase clone GBGA483 (Precursor) GN=At3g07850 OS=Arabidopsis thaliana (Mouse-ear cress) PE=2 SV=2	PREDICTED: polygalacturonase-like [Beta vulgaris subsp. vulgaris]
c43341.graph_c0	--	--	--	--	--	--	--	Transcription factor MYC4 GN=T6K21.60 OS=Arabidopsis thaliana (Mouse-ear cress) PE=1 SV=1	PREDICTED: transcription factor MYC2-like [Beta vulgaris subsp. vulgaris]
c12601.graph_c0	--	--	--	--	[O]	Posttranslational modification, protein turnover, chaperones	Ring finger domain;; RING-H2 zinc finger;; zinc-RING finger domain;; Zinc finger, C3HC4 type (RING finger);; Anaphase-promoting complex subunit 11 RING-H2 finger;; Zinc finger, C3HC4 type (RING finger)	E3 ubiquitin-protein ligase RHA1B GN=RHA1B OS=Arabidopsis thaliana (Mouse-ear cress) PE=2 SV=1	Zinc finger protein, putative [Theobroma cacao]
c38213.graph_c0	--	--	Molecular Function: nucleic acid binding (GO:0003676);;	--	--	--	--	--	PREDICTED: uncharacterized protein LOC104898613 [Beta vulgaris subsp. vulgaris]
c11046.graph_c0	[K]	Transcription	Cellular Component: DNA-directed RNA polymerase IV complex (GO:0000418);; Molecular Function: DNA-directed RNA polymerase activity (GO:0003899);; Biological Process: transcription, DNA-templated (GO:0006351);;	--	[K]	Transcription	SHS2 domain found in N terminus of Rpb7p/Rpc25p/MJ0397	DNA-directed RNA polymerase V subunit 7 GN=NRPE7 OS=Arabidopsis thaliana (Mouse-ear cress) PE=1 SV=1	PREDICTED: DNA-directed RNA polymerase V subunit 7 [Beta vulgaris subsp. vulgaris]
c22505.graph_c0	--	--	Molecular Function: receptor activity (GO:0004872);; Molecular Function: protein binding (GO:0005515);; Cellular Component: nucleus (GO:0005634);; Biological Process: abscisic acid-activated signaling pathway (GO:0009738);;	K14496|2e-43|ath:AT2G38310|hypothetical protein	--	--	Polyketide cyclase / dehydrase and lipid transport	Abscisic acid receptor PYL4 GN=T19C21.20 OS=Arabidopsis thaliana (Mouse-ear cress) PE=1 SV=1	PREDICTED: abscisic acid receptor PYL4-like [Beta vulgaris subsp. vulgaris]
c31826.graph_c0	[L]	Replication, recombination and repair	--	--	--	--	AAA domain;; UvrD/REP helicase N-terminal domain;; AAA domain;; UvrD-like helicase C-terminal domain	Probable helicase MAGATAMA 3 GN=MAA3 OS=Arabidopsis thaliana (Mouse-ear cress) PE=2 SV=1	PREDICTED: uncharacterized protein LOC104887675 [Beta vulgaris subsp. vulgaris]
c30805.graph_c0	--	--	--	--	--	--	Putative S-adenosyl-L-methionine-dependent methyltransferase	Probable methyltransferase PMT9 GN=At5g14430 OS=Arabidopsis thaliana (Mouse-ear cress) PE=2 SV=1	PREDICTED: probable methyltransferase PMT9 [Beta vulgaris subsp. vulgaris]
c19382.graph_c0	--	--	--	--	[R]	General function prediction only	Leucine rich repeat;; Leucine rich repeat N-terminal domain;; Leucine Rich repeats (2 copies)	Receptor-like protein 12 (Precursor) GN=RLP12 OS=Arabidopsis thaliana (Mouse-ear cress) PE=2 SV=2	PREDICTED: receptor-like protein 12 [Beta vulgaris subsp. vulgaris]
c40077.graph_c0	--	--	--	--	--	--	--	--	PREDICTED: uncharacterized protein LOC104890377 [Beta vulgaris subsp. vulgaris]
c25788.graph_c0	--	--	--	--	--	--	--	--	PREDICTED: uncharacterized protein LOC104883395 [Beta vulgaris subsp. vulgaris]
c37963.graph_c0	[G]	Carbohydrate transport and metabolism	--	--	[G]	Carbohydrate transport and metabolism	Glycosyl hydrolase family 1	Beta-glucosidase 18 (Precursor) OS=Oryza sativa subsp. japonica (Rice) PE=3 SV=2	PREDICTED: beta-glucosidase 18-like [Beta vulgaris subsp. vulgaris]
c20176.graph_c0	[RTKL]	--	Molecular Function: protein kinase activity (GO:0004672);; Molecular Function: ATP binding (GO:0005524);; Biological Process: protein phosphorylation (GO:0006468);;	--	--	--	Protein tyrosine kinase;; Protein kinase domain;; TPR repeat;; Tetratricopeptide repeat	Probable serine/threonine-protein kinase At5g41260 GN=At5g41260 OS=Arabidopsis thaliana (Mouse-ear cress) PE=1 SV=1	PREDICTED: probable serine/threonine-protein kinase At5g41260 isoform X1 [Beta vulgaris subsp. vulgaris]
c35726.graph_c0	[J]	Translation, ribosomal structure and biogenesis	Biological Process: cell wall biogenesis (GO:0042546);;	--	--	--	Remorin, C-terminal region	Remorin OS=Solanum tuberosum (Potato) PE=1 SV=1	PREDICTED: remorin-like [Beta vulgaris subsp. vulgaris]
c42575.graph_c0	--	--	Molecular Function: aspartic-type endopeptidase activity (GO:0004190);; Cellular Component: endoplasmic reticulum membrane (GO:0005789);; Biological Process: N-terminal protein myristoylation (GO:0006499);; Biological Process: pollen development (GO:0009555);; Biological Process: pollen germination (GO:0009846);; Cellular Component: integral component of membrane (GO:0016021);;	K09595|6e-72|pop:POPTR_833167|hypothetical protein	[S]	Function unknown	Signal peptide peptidase;; Protein of unknown function (DUF1119)	Signal peptide peptidase 2 OS=Oryza sativa subsp. japonica (Rice) PE=2 SV=1	PREDICTED: LOW QUALITY PROTEIN: signal peptide peptidase 2 [Beta vulgaris subsp. vulgaris]
c15130.graph_c0	--	--	--	--	--	--	Protein of unknown function (DUF793);; Arabidopsis protein of unknown function	--	PREDICTED: uncharacterized protein LOC104890705 [Beta vulgaris subsp. vulgaris]
c1086.graph_c1	--	--	Molecular Function: catalytic activity (GO:0003824);;	--	[R]	General function prediction only	Reverse transcriptase (RNA-dependent DNA polymerase)	--	PREDICTED: uncharacterized protein LOC104887816 [Beta vulgaris subsp. vulgaris]
c62154.graph_c0	[C]	Energy production and conversion	Biological Process: chronological cell aging (GO:0001300);; Biological Process: replicative cell aging (GO:0001302);; Molecular Function: mRNA binding (GO:0003729);; Cellular Component: mitochondrion (GO:0005739);; Biological Process: tricarboxylic acid cycle (GO:0006099);; Biological Process: malate metabolic process (GO:0006108);; Molecular Function: L-malate dehydrogenase activity (GO:0030060)…	K00026|1e-13|ath:AT1G53240|malate dehydrogenase (NAD), mitochondrial (EC:1.1.1.37)	[C]	Energy production and conversion	lactate/malate dehydrogenase, NAD binding domain	Malate dehydrogenase, mitochondrial (Precursor) GN=MDH OS=Brassica napus (Rape) PE=2 SV=1	hypothetical protein V491_08000 [Pseudogymnoascus pannorum VKM F-3775]
c12118.graph_c0	--	--	Cellular Component: nucleus (GO:0005634);;	--	--	--	Protein of unknown function (DUF3537)	--	BnaA06g02680D [Brassica napus]
c17248.graph_c0	--	--	--	--	--	--	--	--	PREDICTED: histone-lysine N-methyltransferase SUVR5 [Beta vulgaris subsp. vulgaris]
c2678.graph_c0	--	--	--	--	--	--	--	--	RNA-directed DNA polymerase [Arachis hypogaea]
c60718.graph_c0	--	--	--	--	--	--	--	--	PREDICTED: uncharacterized protein LOC104898816 [Beta vulgaris subsp. vulgaris]
c17631.graph_c0	[RTKL]	--	Molecular Function: protein kinase activity (GO:0004672);; Biological Process: signal transduction (GO:0007165);; Biological Process: cellular metabolic process (GO:0044237);; Biological Process: innate immune response (GO:0045087);; Biological Process: cellular response to organic substance (GO:0071310);; Biological Process: organic substance metabolic process (GO:0071704);;	--	[T]	Signal transduction mechanisms	Protein tyrosine kinase;; Protein kinase domain	Calmodulin-binding receptor-like cytoplasmic kinase 3 (Precursor) GN=CRCK3 OS=Arabidopsis thaliana (Mouse-ear cress) PE=2 SV=1	PREDICTED: calmodulin-binding receptor-like cytoplasmic kinase 3 [Beta vulgaris subsp. vulgaris]
c36046.graph_c0	--	--	--	--	--	--	HAD superfamily, subfamily IIIB (Acid phosphatase)	Uncharacterized protein At2g39920 GN=At2g39920 OS=Arabidopsis thaliana (Mouse-ear cress) PE=2 SV=2	hypothetical protein CICLE_v10033883mg [Citrus clementina]
c33969.graph_c0	--	--	Molecular Function: nucleic acid binding (GO:0003676);; Molecular Function: zinc ion binding (GO:0008270);;	--	--	--	MuDR family transposase;; MULE transposase domain;; SWIM zinc finger;; Transposase, Mutator family	--	PREDICTED: uncharacterized protein LOC104890414 [Beta vulgaris subsp. vulgaris]
[truncated: 22,774 more rows]

## Sheet: Function_anno.stat
#Anno_Database	Annotated_Number	300<=length<1000	length>=1000
COG_Annotation	7562	1265	5564
GO_Annotation	11522	2728	7434
[truncated: 6 more rows]

## Sheet: GO.list
c10.graph_c1	GO:0005576
[truncated: 11,521 more rows]
[truncated: 13 more columns]

## Sheet: GO_tree.stat
#GO_Function	Unigene_number	Unigene_ID
[truncated: 4,224 more rows]

[truncated: 2 more sheets: Kegg.pathway, Kegg.ko]
