# Supplementary material for: Salt-Responsive Transcriptome Profiling of Suaeda glauca via RNA Sequencing
Source: PLoS One. 2016 Mar 1;11(3):e0150504. doi: 10.1371/journal.pone.0150504 (PMC4773115; doi:10.1371/journal.pone.0150504)
Supplement: S2 Table — (XLSX) [file pone.0150504.s002.xlsx]

## Sheet: S2 Table.xls
#ID	T01	T02	T03	T04	T05	T06	FDR	log2FC	regulated	p_value	COG_class	COG_class_annotation	GO_annotation	KEGG_annotation	KOG_class	KOG_class_annotation	Pfam_annotation	Swissprot_annotation	nr_annotation
c34323.graph_c0	0.453557	1.85074	1.03532	2.72522	5.15792	4.94695	0.004447	1.72992	up	0.000160126	[O]	Posttranslational modification, protein turnover, chaperones	--	--	[O]	Posttranslational modification, protein turnover, chaperones	ATPase family associated with various cellular activities (AAA);; Domain associated at C-terminal with AAA	26S protease regulatory subunit 10B homolog A GN=RPT4A OS=Arabidopsis thaliana (Mouse-ear cress) PE=1 SV=1	PREDICTED: probable mitochondrial chaperone BCS1-B [Beta vulgaris subsp. vulgaris]
c37117.graph_c0	0.268218	0.441996	0.451134	3.93405	2.97011	2.4665	4.05e-07	2.81694	up	2.12e-09	[T]	Signal transduction mechanisms	Molecular Function: hydrolase activity (GO:0016787);;	K14497|1e-168|vvi:100255251|hypothetical protein LOC100255251	[T]	Signal transduction mechanisms	Protein phosphatase 2C;; Protein phosphatase 2C	Probable protein phosphatase 2C 24 GN=At2g29380 OS=Arabidopsis thaliana (Mouse-ear cress) PE=2 SV=1	PREDICTED: probable protein phosphatase 2C 24 [Beta vulgaris subsp. vulgaris]
c39154.graph_c1	2.13732	1.59491	1.6618	0.486154	0.487154	0.336561	1.42e-06	-2.24395	down	9.02e-09	--	--	--	--	--	--	D-mannose binding lectin;; S-locus glycoprotein family;; PAN-like domain	G-type lectin S-receptor-like serine/threonine-protein kinase At1g11330 (Precursor) GN=At1g11330 OS=Arabidopsis thaliana (Mouse-ear cress) PE=2 SV=3	PREDICTED: G-type lectin S-receptor-like serine/threonine-protein kinase At1g11330 [Beta vulgaris subsp. vulgaris]
c40790.graph_c0	3.68539	3.24373	2.9855	5.70622	8.07931	9.26219	0.000798994	1.00224	up	1.75e-05	--	--	--	--	[R]	General function prediction only	Reverse transcriptase (RNA-dependent DNA polymerase);; Integrase core domain;; gag-polypeptide of LTR copia-type;; Retrotransposon gag protein	Endonuclease OS=Nicotiana tabacum (Common tobacco) PE=2 SV=1	hypothetical protein VITISV_035665 [Vitis vinifera]
c35693.graph_c0	1.32967	3.8847	1.29027	6.60369	9.94807	6.57615	0.00258477	1.63055	up	7.52e-05	--	--	--	--	--	--	Seed maturation protein	Late embryogenesis abundant protein D-34 OS=Gossypium hirsutum (Upland cotton) PE=4 SV=1	PREDICTED: late embryogenesis abundant protein D-34-like [Beta vulgaris subsp. vulgaris]
c32393.graph_c0	4.26379	6.53961	4.2649	8.48903	14.7978	12.91	0.00987184	1.05172	up	0.000458372	[S]	Function unknown	--	--	--	--	Leucine Rich Repeat;; Leucine Rich repeat;; Leucine Rich repeats (2 copies);; Leucine rich repeat;; Leucine rich repeat N-terminal domain;; Leucine rich repeat	Probable LRR receptor-like serine/threonine-protein kinase At4g37250 (Precursor) GN=At4g37250 OS=Arabidopsis thaliana (Mouse-ear cress) PE=2 SV=1	PREDICTED: probable LRR receptor-like serine/threonine-protein kinase At4g37250 [Beta vulgaris subsp. vulgaris]
c40251.graph_c0	1.05373	2.33178	2.19326	0.084687	0.0979166	0.122142	3.74e-07	-4.40467	down	1.94e-09	[L]	Replication, recombination and repair	Molecular Function: RNA binding (GO:0003723);; Molecular Function: RNA-directed DNA polymerase activity (GO:0003964);; Biological Process: RNA-dependent DNA replication (GO:0006278);; Molecular Function: zinc ion binding (GO:0008270);; Biological Process: DNA integration (GO:0015074);;	--	[R]	General function prediction only	Reverse transcriptase (RNA-dependent DNA polymerase);; Integrase core domain	Uncharacterized mitochondrial protein AtMg00860 GN=AtMg00860 OS=Arabidopsis thaliana (Mouse-ear cress) PE=4 SV=1	hypothetical protein VITISV_020252 [Vitis vinifera]
c43530.graph_c0	1.75808	1.94522	2.18081	5.12196	5.35032	3.99423	0.00893184	1.09352	up	0.000400822	--	--	--	--	--	--	Late embryogenesis abundant protein	Protein YLS9 GN=F11F19.11 OS=Arabidopsis thaliana (Mouse-ear cress) PE=2 SV=1	PREDICTED: protein YLS9-like [Beta vulgaris subsp. vulgaris]
c35704.graph_c0	2.27389	1.2534	1.95895	0.93604	0.566902	0.720016	0.00691401	-1.50248	down	0.000283934	--	--	--	--	[R]	General function prediction only	GAG-pre-integrase domain	Endonuclease OS=Nicotiana tabacum (Common tobacco) PE=2 SV=1	PREDICTED: uncharacterized protein LOC104889326 [Beta vulgaris subsp. vulgaris]
c39700.graph_c0	3.24162	3.91234	3.57087	6.60487	9.24886	9.82243	0.00212841	1.04624	up	5.83e-05	--	--	--	--	--	--	--	--	unnamed protein product [Coffea canephora]
c32549.graph_c0	0.770329	1.65802	0.524437	2.68279	2.72694	2.92539	0.003746	1.30157	up	0.00012516	[MG]	--	Biological Process: anthocyanin-containing compound biosynthetic process (GO:0009718);; Biological Process: cellular metabolic process (GO:0044237);; Molecular Function: dihydrokaempferol 4-reductase activity (GO:0045552);; Molecular Function: coenzyme binding (GO:0050662);; Biological Process: oxidation-reduction process (GO:0055114);;	K13082|1e-117|pop:POPTR_206006|DFR2	[V]	Defense mechanisms	NAD dependent epimerase/dehydratase family;; NADH(P)-binding;; NAD dependent epimerase/dehydratase family;; NmrA-like family;; 3-beta hydroxysteroid dehydrogenase/isomerase family	Dihydroflavonol-4-reductase GN=A OS=Dianthus caryophyllus (Carnation) PE=2 SV=1	dihydroflavonol 4-reductase [Spinacia oleracea]
c36991.graph_c0	0.37826	2.20838	1.03916	3.34404	4.0539	4.91073	0.00268814	1.56095	up	7.94e-05	[S]	Function unknown	Biological Process: metabolic process (GO:0008152);; Biological Process: post-embryonic development (GO:0009791);; Biological Process: response to organic substance (GO:0010033);; Molecular Function: oxidoreductase activity (GO:0016491);; Biological Process: single-organism cellular process (GO:0044763);; Biological Process: shoot system development (GO:0048367);; Biological Process: organ develo…	--	[R]	General function prediction only	Leucine rich repeat;; Leucine Rich Repeat;; Leucine Rich repeats (2 copies);; Leucine Rich repeat	Protein TOO MANY MOUTHS (Precursor) GN=F18B13.16 OS=Arabidopsis thaliana (Mouse-ear cress) PE=1 SV=1	PREDICTED: protein TOO MANY MOUTHS [Beta vulgaris subsp. vulgaris]
c34064.graph_c0	6.52004	4.10179	3.12661	17.7717	10.751	17.2122	0.00287525	1.5367	up	8.69e-05	--	--	--	--	[O]	Posttranslational modification, protein turnover, chaperones	Xylanase inhibitor C-terminal;; Xylanase inhibitor N-terminal	Basic 7S globulin low kDa subunit (Precursor) GN=BG OS=Glycine max (Soybean) PE=1 SV=2	PREDICTED: basic 7S globulin-like [Beta vulgaris subsp. vulgaris]
c38092.graph_c0	1.29563	1.80566	1.13319	3.49873	3.70819	4.03691	0.00910881	1.20551	up	0.0004131	--	--	Molecular Function: transferase activity, transferring glycosyl groups (GO:0016757);;	--	--	--	Raffinose synthase or seed imbibition protein Sip1	Probable galactinol--sucrose galactosyltransferase 5 OS=Arabidopsis thaliana (Mouse-ear cress) PE=1 SV=1	PREDICTED: galactinol--sucrose galactosyltransferase-like [Beta vulgaris subsp. vulgaris]
c18336.graph_c0	0.583757	1.24598	0.392744	2.84624	5.71382	4.65541	7.17e-05	2.36375	up	8.58e-07	--	--	--	--	--	--	Pathogenesis-related protein Bet v I family	MLP-like protein 43 GN=MLP43 OS=Arabidopsis thaliana (Mouse-ear cress) PE=1 SV=1	PREDICTED: MLP-like protein 43 [Beta vulgaris subsp. vulgaris]
c18101.graph_c0	6.61821	6.32305	8.61277	2.95068	4.84811	4.16611	0.00160002	-1.06775	down	4.06e-05	--	--	--	K09422|6e-08|vvi:100260656|MYB12, mybF1	--	--	--	--	transcription factor MYB12 [Beta vulgaris subsp. vulgaris]
c30114.graph_c0	143.896	129.427	115.756	64.7617	60.0052	44.4548	4.66e-14	-1.40031	down	3.88e-17	[S]	Function unknown	Cellular Component: plastid (GO:0009536);; Biological Process: protein catabolic process (GO:0030163);;	--	--	--	ATP-dependent Clp protease adaptor protein ClpS	--	PREDICTED: uncharacterized protein LOC104902634 [Beta vulgaris subsp. vulgaris]
c30104.graph_c0	16.8685	13.1148	10.6942	8.20376	7.31496	5.93611	0.00369436	-1.12156	down	0.000122911	--	--	--	--	--	--	--	--	PREDICTED: uncharacterized protein At1g05835-like [Beta vulgaris subsp. vulgaris]
c36875.graph_c0	10.7853	10.511	8.38335	31.6088	34.912	28.1203	2.92e-18	1.46931	up	6.95e-22	[R]	General function prediction only	Molecular Function: zinc ion binding (GO:0008270);; Biological Process: response to bacterium (GO:0009617);; Biological Process: plant-type hypersensitive response (GO:0009626);; Biological Process: lignin biosynthetic process (GO:0009809);; Molecular Function: aryl-alcohol dehydrogenase (NAD+) activity (GO:0018456);; Molecular Function: cinnamyl-alcohol dehydrogenase activity (GO:0045551);; Mole…	--	[Q]	Secondary metabolites biosynthesis, transport and catabolism	Alcohol dehydrogenase GroES-like domain;; Zinc-binding dehydrogenase;; PAXNEB protein;; PAXNEB protein	Probable mannitol dehydrogenase GN=ELI3 OS=Mesembryanthemum crystallinum (Common ice plant) PE=2 SV=1	PREDICTED: probable mannitol dehydrogenase [Beta vulgaris subsp. vulgaris]
c42072.graph_c0	11.0441	11.0163	10.3158	25.6458	22.9997	29.3883	5.51e-08	1.06393	up	2.03e-10	--	--	--	--	--	--	--	Putative proline-rich receptor-like protein kinase PERK6 GN=PERK6 OS=Arabidopsis thaliana (Mouse-ear cress) PE=2 SV=2	PREDICTED: uncharacterized protein DDB_G0283357-like [Beta vulgaris subsp. vulgaris]
c31524.graph_c0	0.334196	1.48358	0.481806	2.11035	3.06113	3.71887	0.0047884	1.74758	up	0.000177549	--	--	Cellular Component: extracellular region (GO:0005576);; Biological Process: negative regulation of stomatal complex development (GO:2000122);;	--	--	--	--	CHALLAH {ECO:0000303|PubMed:22027592} (Precursor) GN=T9D9.18 OS=Arabidopsis thaliana (Mouse-ear cress) PE=1 SV=1	PREDICTED: EPIDERMAL PATTERNING FACTOR-like protein 6 [Beta vulgaris subsp. vulgaris]
c20757.graph_c0	24.5785	21.8009	16.6445	12.8361	13.3444	8.451	0.0014103	-1.06326	down	3.5e-05	--	--	--	--	--	--	--	--	PREDICTED: uncharacterized protein LOC104885324 [Beta vulgaris subsp. vulgaris]
c11256.graph_c0	173.963	157.875	115.633	62.476	70.6014	51.2401	1.34e-06	-1.48226	down	8.24e-09	--	--	--	--	--	--	Late embryogenesis abundant protein	Late embryogenesis abundant protein Lea5 GN=LEA5 OS=Citrus sinensis (Sweet orange) PE=2 SV=1	PREDICTED: late embryogenesis abundant protein Lea5 [Beta vulgaris subsp. vulgaris]
c13016.graph_c0	1.2789	2.76986	2.15107	4.41972	7.48698	7.59006	0.00186827	1.43841	up	4.91e-05	--	--	--	--	--	--	DVL family	--	hypothetical protein JCGZ_02962 [Jatropha curcas]
c41247.graph_c0	35.7164	38.9092	37.0396	99.1624	86.2334	112.133	1.02e-10	1.20912	up	1.57e-13	--	--	--	--	--	--	--	--	PREDICTED: uncharacterized protein LOC104882862 [Beta vulgaris subsp. vulgaris]
c26327.graph_c0	4.00434	7.74635	6.47894	13.2228	25.5212	25.1051	0.00322547	1.59062	up	0.000102331	--	--	Molecular Function: peroxidase activity (GO:0004601);; Biological Process: response to oxidative stress (GO:0006979);; Molecular Function: heme binding (GO:0020037);; Molecular Function: metal ion binding (GO:0046872);; Biological Process: oxidation-reduction process (GO:0055114);;	K00430|1e-162|pop:POPTR_830144|hypothetical protein	--	--	Peroxidase	Peroxidase 12 (Precursor) OS=Arabidopsis thaliana (Mouse-ear cress) PE=1 SV=1	PREDICTED: peroxidase 12-like [Beta vulgaris subsp. vulgaris]
c35221.graph_c0	71.1685	112.331	69.8471	148.838	256.068	254.395	0.00661129	1.16678	up	0.000269142	--	--	Cellular Component: plant-type cell wall (GO:0009505);; Biological Process: response to karrikin (GO:0080167);;	--	--	--	Protein of unknown function (DUF642)	--	PREDICTED: uncharacterized protein LOC104887687 [Beta vulgaris subsp. vulgaris]
c31473.graph_c0	6.01047	4.37833	2.76578	10.7245	11.7324	9.81516	8e-05	1.09191	up	1e-06	[RTKL]	--	Biological Process: mitotic G2 phase (GO:0000085);; Biological Process: microtubule cytoskeleton organization (GO:0000226);; Cellular Component: chromosome, centromeric region (GO:0000775);; Biological Process: cytokinesis by cell plate formation (GO:0000911);; Molecular Function: ATP binding (GO:0005524);; Cellular Component: nucleus (GO:0005634);; Cellular Component: spindle (GO:0005819);; Biol…	--	[D]	Cell cycle control, cell division, chromosome partitioning	Protein kinase domain;; Protein tyrosine kinase;; Kinase-like	Serine/threonine-protein kinase Aurora-3 GN=AUR3 OS=Arabidopsis thaliana (Mouse-ear cress) PE=2 SV=1	PREDICTED: serine/threonine-protein kinase Aurora-3-like [Beta vulgaris subsp. vulgaris]
c31336.graph_c0	1.55341	1.87418	1.51051	3.86241	3.56361	5.22181	0.00982041	1.15064	up	0.000454724	--	--	--	--	[O]	Posttranslational modification, protein turnover, chaperones	Ring finger domain;; RING-H2 zinc finger;; Zinc finger, C3HC4 type (RING finger);; Zinc finger, C3HC4 type (RING finger);; zinc-RING finger domain;; Zinc finger, C3HC4 type (RING finger)	E3 ubiquitin-protein ligase RING1 GN=F12B17_270 OS=Arabidopsis thaliana (Mouse-ear cress) PE=1 SV=1	PREDICTED: E3 ubiquitin-protein ligase RING1-like [Beta vulgaris subsp. vulgaris]
c27355.graph_c0	17.5278	18.746	16.6442	67.7527	49.5639	58.1264	3.74e-07	1.53106	up	1.92e-09	--	--	Molecular Function: transcription cofactor activity (GO:0003712);; Molecular Function: histone acetyltransferase activity (GO:0004402);; Cellular Component: nucleus (GO:0005634);; Biological Process: regulation of transcription, DNA-templated (GO:0006355);; Molecular Function: zinc ion binding (GO:0008270);; Biological Process: histone acetylation (GO:0016573);;	--	[K]	Transcription	BTB/POZ domain;; TAZ zinc finger	BTB/POZ and TAZ domain-containing protein 1 GN=BT1 OS=Arabidopsis thaliana (Mouse-ear cress) PE=1 SV=1	PREDICTED: BTB/POZ and TAZ domain-containing protein 2 [Beta vulgaris subsp. vulgaris]
c42510.graph_c0	18.4095	15.828	16.094	7.83636	7.70822	9.31167	1.17e-05	-1.22555	down	1.03e-07	--	--	Biological Process: metal ion transport (GO:0030001);; Molecular Function: metal ion binding (GO:0046872);;	--	[P]	Inorganic ion transport and metabolism	Heavy-metal-associated domain	Copper transport protein ATX1 GN=ATX1 OS=Arabidopsis thaliana (Mouse-ear cress) PE=1 SV=1	PREDICTED: copper transport protein ATX1 isoform X2 [Beta vulgaris subsp. vulgaris]
c36692.graph_c1	0.639889	0.790853	0.302702	2.05709	1.821	1.44636	0.00339059	1.42729	up	0.000109576	[C]	Energy production and conversion	--	K00166|1e-150|pop:POPTR_559310|hypothetical protein	[C]	Energy production and conversion	Dehydrogenase E1 component;; Transketolase, thiamine diphosphate binding domain;; Thiamine pyrophosphate enzyme, C-terminal TPP binding domain;; 1-deoxy-D-xylulose-5-phosphate synthase	2-oxoisovalerate dehydrogenase subunit alpha 2, mitochondrial (Precursor) GN=At5g09300 OS=Arabidopsis thaliana (Mouse-ear cress) PE=1 SV=1	PREDICTED: 2-oxoisovalerate dehydrogenase subunit alpha 1, mitochondrial-like [Beta vulgaris subsp. vulgaris]
c41840.graph_c0	13.0636	14.1466	15.1858	26.4339	52.6293	54.7868	0.00953579	1.43676	up	0.000437005	--	--	--	K09571|3e-08|ath:AT3G25230|ROF1	[O]	Posttranslational modification, protein turnover, chaperones	--	Peptidyl-prolyl cis-trans isomerase FKBP62 GN=MJL12.19 OS=Arabidopsis thaliana (Mouse-ear cress) PE=1 SV=2	PREDICTED: uncharacterized protein LOC104906294 [Beta vulgaris subsp. vulgaris]
c37002.graph_c0	0.710555	1.31032	0.871449	3.02189	2.2697	2.91018	9.74e-05	1.30716	up	1.29e-06	--	--	Molecular Function: translation initiation factor activity (GO:0003743);; Biological Process: translational initiation (GO:0006413);; Biological Process: vegetative phase change (GO:0010050);; Biological Process: production of ta-siRNAs involved in RNA interference (GO:0010267);; Biological Process: maintenance of shoot apical meristem identity (GO:0010492);; Biological Process: production of lsi…	--	[J]	Translation, ribosomal structure and biogenesis	Piwi domain;; PAZ domain;; Domain of unknown function (DUF1785)	Protein argonaute 7 GN=F10D13.11 OS=Arabidopsis thaliana (Mouse-ear cress) PE=2 SV=1	PREDICTED: protein argonaute 7 [Beta vulgaris subsp. vulgaris]
c26862.graph_c0	1.56634	2.30462	1.48193	4.16996	6.14044	3.99436	0.00191235	1.21191	up	5.09e-05	[M]	Cell wall/membrane/envelope biogenesis	Molecular Function: polygalacturonase activity (GO:0004650);; Cellular Component: extracellular region (GO:0005576);; Biological Process: carbohydrate metabolic process (GO:0005975);;	--	--	--	Glycosyl hydrolases family 28;; Pectate lyase superfamily protein	Probable polygalacturonase OS=Vitis vinifera (Grape) PE=1 SV=1	PREDICTED: probable polygalacturonase [Beta vulgaris subsp. vulgaris]
c17059.graph_c0	0.0869665	0.491355	0.0365687	0.978518	1.33341	1.29033	5.8e-06	2.35969	up	4.32e-08	[P]	Inorganic ion transport and metabolism	--	K01674|1e-101|vvi:100264066|hypothetical protein LOC100264066	[R]	General function prediction only	Eukaryotic-type carbonic anhydrase	Alpha carbonic anhydrase 7 (Precursor) GN=ACA7 OS=Arabidopsis thaliana (Mouse-ear cress) PE=2 SV=1	PREDICTED: alpha carbonic anhydrase 7-like [Beta vulgaris subsp. vulgaris]
c30479.graph_c0	3.18178	5.60979	3.35901	0.870524	0.880701	0.753323	3.85e-05	-2.47682	down	4.17e-07	--	--	--	--	--	--	Cupin	11S globulin seed storage protein 2 basic chain (Precursor) OS=Sesamum indicum (Oriental sesame) PE=2 SV=1	PREDICTED: uncharacterized protein LOC104894026 [Beta vulgaris subsp. vulgaris]
c39006.graph_c0	1.0423	1.00543	1.26139	0.28604	0.685073	0.117871	8.32e-05	-1.8206	down	1.06e-06	[G]	Carbohydrate transport and metabolism	Biological Process: metabolic process (GO:0008152);; Molecular Function: hydrolase activity, acting on glycosyl bonds (GO:0016798);;	--	--	--	Alpha-L-arabinofuranosidase C-terminus	Alpha-L-arabinofuranosidase 1 (Precursor) GN=T7M13.18 OS=Arabidopsis thaliana (Mouse-ear cress) PE=1 SV=1	PREDICTED: alpha-L-arabinofuranosidase 1-like [Beta vulgaris subsp. vulgaris]
c37381.graph_c0	4.191	13.7613	6.09265	19.283	29.0709	30.831	0.00208047	1.51333	up	5.67e-05	[O]	Posttranslational modification, protein turnover, chaperones	Molecular Function: serine-type endopeptidase activity (GO:0004252);; Cellular Component: extracellular region (GO:0005576);; Biological Process: proteolysis (GO:0006508);; Molecular Function: identical protein binding (GO:0042802);; Biological Process: negative regulation of catalytic activity (GO:0043086);;	--	--	--	Subtilase family;; PA domain;; Peptidase inhibitor I9	Subtilisin-like protease (Precursor) GN=At5g67360 OS=Arabidopsis thaliana (Mouse-ear cress) PE=1 SV=1	PREDICTED: subtilisin-like protease [Beta vulgaris subsp. vulgaris]
c24727.graph_c0	2.93325	1.98306	4.30112	0.725362	0.838677	1.04617	0.00801831	-2.03894	down	0.000345033	[TZDR]	--	--	K02183|8e-25|olu:OSTLU_39965|hypothetical protein	[Z]	Cytoskeleton	EF-hand domain pair;; EF hand	Calmodulin OS=Pythium splendens (Leaf rot fungus) PE=2 SV=1	hypothetical protein M422DRAFT_219406 [Sphaerobolus stellatus SS14]
c25336.graph_c0	0.481514	0.725473	0.566924	1.81885	1.6108	1.74141	0.00985863	1.34303	up	0.000457081	--	--	--	--	[K]	Transcription	--	--	PREDICTED: uncharacterized protein LOC104902318 [Beta vulgaris subsp. vulgaris]
c44071.graph_c0	0.70399	1.25605	0.716685	2.59072	4.51038	2.50821	0.00868512	1.63655	up	0.000387165	[P]	Inorganic ion transport and metabolism	Molecular Function: peroxidase activity (GO:0004601);; Biological Process: response to oxidative stress (GO:0006979);; Molecular Function: heme binding (GO:0020037);; Biological Process: oxidation-reduction process (GO:0055114);;	--	--	--	Peroxidase	L-ascorbate peroxidase 2, cytosolic GN=F11F8_23 OS=Arabidopsis thaliana (Mouse-ear cress) PE=2 SV=3	PREDICTED: L-ascorbate peroxidase 2, cytosolic-like [Beta vulgaris subsp. vulgaris]
c42948.graph_c0	2.45987	3.08847	3.16053	8.07264	8.31782	10.2015	0.000250712	1.40166	up	4.1e-06	--	--	--	--	--	--	--	--	unnamed protein product [Coffea canephora]
c30322.graph_c0	32.8381	18.6054	20.8256	1.68907	3.48187	3.57723	3.09e-07	-3.26951	down	1.51e-09	[G]	Carbohydrate transport and metabolism	Biological Process: carbohydrate metabolic process (GO:0005975);; Molecular Function: carbohydrate binding (GO:0030246);; Molecular Function: maltose alpha-glucosidase activity (GO:0032450);;	--	[G]	Carbohydrate transport and metabolism	Glycosyl hydrolases family 31	Putative alpha-xylosidase 2 (Precursor) GN=XYL2 OS=Arabidopsis thaliana (Mouse-ear cress) PE=5 SV=1	PREDICTED: alpha-glucosidase-like [Beta vulgaris subsp. vulgaris]
c20643.graph_c0	2.15892	2.11428	1.52512	6.66281	6.41972	4.00401	0.00466729	1.36257	up	0.000171114	--	--	--	--	--	--	TCP family transcription factor	Transcription factor TCP20 GN=MOJ10.8 OS=Arabidopsis thaliana (Mouse-ear cress) PE=1 SV=1	PREDICTED: transcription factor TCP20 [Beta vulgaris subsp. vulgaris]
c41685.graph_c0	33.4768	28.7719	27.0024	18.3727	14.9525	14.4756	7.33e-09	-1.10005	down	2.18e-11	[E]	Amino acid transport and metabolism	--	K01704|5e-54|vvi:100241307|hypothetical protein LOC100241307	[E]	Amino acid transport and metabolism	Aconitase C-terminal domain	3-isopropylmalate dehydratase small subunit 3 (Precursor) GN=At2g43090 OS=Arabidopsis thaliana (Mouse-ear cress) PE=1 SV=1	PREDICTED: 3-isopropylmalate dehydratase small subunit 3-like [Beta vulgaris subsp. vulgaris]
c31288.graph_c0	0.366787	0.974486	0.561842	0.021056	0.0730359	0.0242948	0.000246514	-4.22473	down	3.99e-06	[L]	Replication, recombination and repair	--	--	[R]	General function prediction only	Retrotransposon gag protein;; gag-polyprotein putative aspartyl protease;; Aspartyl protease	RNA-directed DNA polymerase homolog OS=Oenothera berteroana (Bertero&apos;s evening primrose) PE=4 SV=1	PREDICTED: uncharacterized protein LOC104891519 [Beta vulgaris subsp. vulgaris]
c26976.graph_c0	4.72563	4.31903	3.91573	2.06653	2.00189	1.41775	0.0014396	-1.44022	down	3.6e-05	[Q]	Secondary metabolites biosynthesis, transport and catabolism	Molecular Function: binding (GO:0005488);; Molecular Function: oxidoreductase activity (GO:0016491);;	--	[QI]	--	Cytochrome P450	Alkane hydroxylase MAH1 {ECO:0000303|PubMed:17905869} OS=Arabidopsis thaliana (Mouse-ear cress) PE=2 SV=1	PREDICTED: cytochrome P450 86B1-like [Beta vulgaris subsp. vulgaris]
c29560.graph_c0	36.028	28.6947	30.8486	16.8086	16.132	13.1819	2.14e-10	-1.25397	down	3.7e-13	[R]	General function prediction only	Molecular Function: nucleotide binding (GO:0000166);; Cellular Component: heterotrimeric G-protein complex (GO:0005834);; Biological Process: oligopeptide transport (GO:0006857);; Biological Process: response to brassinosteroid (GO:0009741);; Molecular Function: transferase activity (GO:0016740);;	--	[R]	General function prediction only	WD domain, G-beta repeat;; PQQ-like domain;; Nucleoporin Nup120/160	Guanine nucleotide-binding protein subunit beta-like protein OS=Nicotiana plumbaginifolia (Leadwort-leaved tobacco) PE=2 SV=1	PREDICTED: F-box/WD repeat-containing protein 11 [Beta vulgaris subsp. vulgaris]
c35781.graph_c0	11.7183	7.43534	6.80961	4.26433	3.62193	2.23861	0.00817414	-1.55407	down	0.000353198	--	--	--	--	--	--	Transferase family	Uncharacterized acetyltransferase At3g50280 GN=At3g50280 OS=Arabidopsis thaliana (Mouse-ear cress) PE=3 SV=1	PREDICTED: uncharacterized acetyltransferase At3g50280-like [Beta vulgaris subsp. vulgaris]
c39133.graph_c0	2.4351	1.95644	1.97273	0.412959	0.518991	1.07726	1.35e-06	-1.8833	down	8.53e-09	[RTKL]	--	--	--	--	--	Protein tyrosine kinase;; Protein kinase domain;; Salt stress response/antifungal	Cysteine-rich receptor-like protein kinase 10 (Precursor) GN=F21P8.70 OS=Arabidopsis thaliana (Mouse-ear cress) PE=1 SV=3	PREDICTED: cysteine-rich receptor-like protein kinase 8 isoform X1 [Beta vulgaris subsp. vulgaris]
c36513.graph_c0	1.17118	2.29052	1.43953	12.4778	6.92051	6.87832	0.0077621	2.23871	up	0.000328002	--	--	Biological Process: response to hypoxia (GO:0001666);; Molecular Function: protein binding (GO:0005515);; Cellular Component: nucleus (GO:0005634);; Cellular Component: cytosol (GO:0005829);; Cellular Component: plasma membrane (GO:0005886);; Cellular Component: plasmodesma (GO:0009506);; Biological Process: systemic acquired resistance, salicylic acid mediated signaling pathway (GO:0009862);; Bi…	--	--	--	Aluminium induced protein	Stem-specific protein TSJT1 GN=TSJT1 OS=Nicotiana tabacum (Common tobacco) PE=2 SV=1	PREDICTED: stem-specific protein TSJT1 [Beta vulgaris subsp. vulgaris]
c38030.graph_c0	0.324262	1.16586	0.421444	2.7956	2.60229	1.77683	0.004142	1.72065	up	0.000145199	[Q]	Secondary metabolites biosynthesis, transport and catabolism	Molecular Function: monooxygenase activity (GO:0004497);; Molecular Function: iron ion binding (GO:0005506);; Molecular Function: electron carrier activity (GO:0009055);; Molecular Function: oxidoreductase activity, acting on paired donors, with incorporation or reduction of molecular oxygen (GO:0016705);; Molecular Function: heme binding (GO:0020037);; Biological Process: oxidation-reduction pro…	--	[Q]	Secondary metabolites biosynthesis, transport and catabolism	Cytochrome P450	Cytochrome P450 78A4 GN=CYP78A4 OS=Pinus radiata (Monterey pine) PE=2 SV=1	PREDICTED: cytochrome P450 78A5-like [Beta vulgaris subsp. vulgaris]
c43755.graph_c0	0.692858	2.07244	0.616958	3.79964	7.61238	5.0644	0.00251388	2.07927	up	7.17e-05	--	--	Molecular Function: calcium ion binding (GO:0005509);; Molecular Function: calcium-dependent phospholipid binding (GO:0005544);;	--	[U]	Intracellular trafficking, secretion, and vesicular transport	Annexin	Annexin D2 GN=MXK3.27 OS=Arabidopsis thaliana (Mouse-ear cress) PE=1 SV=1	PREDICTED: annexin D2-like [Beta vulgaris subsp. vulgaris]
c38192.graph_c0	4.82723	4.96844	4.28621	2.50821	2.98349	1.93629	0.000138231	-1.1268	down	1.96e-06	[E]	Amino acid transport and metabolism	Molecular Function: transporter activity (GO:0005215);; Biological Process: transport (GO:0006810);; Cellular Component: membrane (GO:0016020);;	--	[E]	Amino acid transport and metabolism	POT family	Protein NRT1/ PTR FAMILY 4.6 GN=At1g69850 OS=Arabidopsis thaliana (Mouse-ear cress) PE=1 SV=1	PREDICTED: protein NRT1/ PTR FAMILY 4.6-like [Beta vulgaris subsp. vulgaris]
c33804.graph_c0	0.396097	1.24329	0.499666	3.07728	3.43532	2.99967	4.52e-05	1.95657	up	5.11e-07	--	--	--	--	--	--	Wound-induced protein	--	PREDICTED: uncharacterized protein LOC104907243 [Beta vulgaris subsp. vulgaris]
c12432.graph_c0	1.33937	3.2104	1.43359	4.79506	8.71221	6.21011	0.00847825	1.51303	up	0.000373844	--	--	Biological Process: metabolic process (GO:0008152);;	--	--	--	--	AP2-like ethylene-responsive transcription factor ANT GN=T28I19.30 OS=Arabidopsis thaliana (Mouse-ear cress) PE=1 SV=2	PREDICTED: AP2-like ethylene-responsive transcription factor ANT [Beta vulgaris subsp. vulgaris]
c34959.graph_c0	8.8031	6.92817	4.88485	20.6855	16.0726	15.6323	0.00167105	1.14954	up	4.28e-05	--	--	--	--	[E]	Amino acid transport and metabolism	WD domain, G-beta repeat	E3 ubiquitin-protein ligase COP1 GN=COP1 OS=Pisum sativum (Garden pea) PE=2 SV=1	PREDICTED: diphthamide biosynthesis protein 7 homolog [Beta vulgaris subsp. vulgaris]
c11252.graph_c0	637.28	569.768	557.813	203.739	185.017	152.884	1.52e-45	-1.90475	down	9.07e-50	--	--	Cellular Component: extracellular region (GO:0005576);; Cellular Component: cell wall (GO:0005618);; Biological Process: defense response (GO:0006952);;	--	--	--	Gibberellin regulated protein	Snakin-1 (Precursor) GN=SN1 OS=Solanum tuberosum (Potato) PE=1 SV=1	PREDICTED: peamaclein [Beta vulgaris subsp. vulgaris]
c37784.graph_c0	2.87836	2.68908	2.13475	1.03826	1.51636	1.51322	0.00341808	-1.13371	down	0.000110871	[P]	Inorganic ion transport and metabolism	Cellular Component: plasma membrane (GO:0005886);; Molecular Function: secondary active sulfate transmembrane transporter activity (GO:0008271);; Biological Process: sulfate transport (GO:0008272);; Biological Process: cellular response to sulfate starvation (GO:0009970);; Cellular Component: integral component of membrane (GO:0016021);; Biological Process: transmembrane transport (GO:0055085);; …	--	[P]	Inorganic ion transport and metabolism	Sulfate transporter family;; Sulfate transporter N-terminal domain with GLY motif;; STAS domain	Sulfate transporter 1.2 GN=SULTR1;2 OS=Arabidopsis thaliana (Mouse-ear cress) PE=1 SV=1	PREDICTED: sulfate transporter 1.2-like [Beta vulgaris subsp. vulgaris]
c38340.graph_c0	0.343804	0.622586	0.244651	1.02023	1.84314	1.37336	0.00249037	1.59922	up	7.01e-05	[V]	Defense mechanisms	Molecular Function: ATP binding (GO:0005524);; Cellular Component: plasma membrane (GO:0005886);; Biological Process: ATP catabolic process (GO:0006200);; Molecular Function: xenobiotic-transporting ATPase activity (GO:0008559);; Biological Process: vernalization response (GO:0010048);; Biological Process: auxin efflux (GO:0010315);; Molecular Function: auxin efflux transmembrane transporter acti…	--	[Q]	Secondary metabolites biosynthesis, transport and catabolism	ABC transporter transmembrane region;; ABC transporter;; Protein of unknown function (DUF1602)	ABC transporter B family member 15 GN=MZF16.16 OS=Arabidopsis thaliana (Mouse-ear cress) PE=3 SV=1	PREDICTED: ABC transporter B family member 15-like [Beta vulgaris subsp. vulgaris]
c37004.graph_c0	86.4525	60.7192	59.3834	35.9633	33.6393	27.0549	0.000401309	-1.29692	down	7.54e-06	--	--	Molecular Function: selenium binding (GO:0008430);;	--	[P]	Inorganic ion transport and metabolism	56kDa selenium binding protein (SBP56)	Selenium-binding protein 1 GN=SBP1 OS=Arabidopsis thaliana (Mouse-ear cress) PE=1 SV=1	PREDICTED: selenium-binding protein 1 [Beta vulgaris subsp. vulgaris]
c35168.graph_c0	131.794	102.296	100.707	48.4757	73.7231	70.6378	7.63e-05	-1.01108	down	9.32e-07	--	--	--	--	--	--	Gibberellin regulated protein	Peamaclein OS=Prunus persica (Peach) PE=1 SV=1	PREDICTED: peamaclein-like [Beta vulgaris subsp. vulgaris]
c26151.graph_c0	5.87625	5.5334	9.31069	2.66934	3.16548	2.76406	0.00635056	-1.48202	down	0.000255531	[KAD]	--	Molecular Function: DNA binding (GO:0003677);; Molecular Function: chromatin binding (GO:0003682);; Molecular Function: sequence-specific DNA binding transcription factor activity (GO:0003700);; Cellular Component: nucleus (GO:0005634);; Biological Process: response to ethylene (GO:0009723);; Biological Process: response to auxin (GO:0009733);; Biological Process: response to sucrose (GO:0009744)…	K09422|1e-63|pop:POPTR_408744|MYB111	[K]	Transcription	Myb-like DNA-binding domain;; Myb-like DNA-binding domain	Transcription factor MYB12 GN=T30B22.24 OS=Arabidopsis thaliana (Mouse-ear cress) PE=2 SV=1	transcription factor MYB12 [Beta vulgaris subsp. vulgaris]
c30527.graph_c0	6.01046	6.56451	5.54326	17.5265	13.8695	14.193	1.44e-05	1.13329	up	1.33e-07	--	--	Molecular Function: diacylglycerol O-acyltransferase activity (GO:0004144);; Biological Process: glycerolipid biosynthetic process (GO:0045017);;	--	--	--	Wax ester synthase-like Acyl-CoA acyltransferase domain;; Protein of unknown function (DUF1298)	O-acyltransferase WSD1 GN=WSD1 OS=Arabidopsis thaliana (Mouse-ear cress) PE=2 SV=1	PREDICTED: O-acyltransferase WSD1-like isoform X1 [Beta vulgaris subsp. vulgaris]
c12481.graph_c0	1.95061	5.37535	2.96725	7.67706	12.4749	9.49638	0.00621487	1.31911	up	0.000246333	--	--	--	--	--	--	NHL repeat	--	PREDICTED: uncharacterized protein LOC104897417 isoform X1 [Beta vulgaris subsp. vulgaris]
c41208.graph_c0	134.414	111.493	104.451	51.7336	60.3426	46.5371	1.39e-11	-1.34949	down	1.98e-14	--	--	--	--	--	--	Polyketide cyclase / dehydrase and lipid transport	Lachrymatory-factor synthase (Precursor) GN=LFS OS=Allium cepa (Onion) PE=1 SV=1	PREDICTED: lachrymatory-factor synthase-like [Beta vulgaris subsp. vulgaris]
c11248.graph_c0	179.586	217.345	236.694	92.9872	93.835	96.6436	1.24e-11	-1.36717	down	1.62e-14	[C]	Energy production and conversion	Molecular Function: monooxygenase activity (GO:0004497);; Cellular Component: chloroplast (GO:0009507);; Biological Process: photorespiration (GO:0009853);; Molecular Function: ribulose-bisphosphate carboxylase activity (GO:0016984);; Biological Process: reductive pentose-phosphate cycle (GO:0019253);; Biological Process: oxidation-reduction process (GO:0055114);;	K01602|3e-39|rcu:RCOM_0030020|Ribulose bisphosphate carboxylase small chain, chloroplast precursor, putative (EC:4.1.1.39)	--	--	Ribulose-1,5-bisphosphate carboxylase small subunit;; Ribulose bisphosphate carboxylase, small chain	Ribulose bisphosphate carboxylase small chain 3, chloroplastic (Precursor) GN=RBCS-3 OS=Mesembryanthemum crystallinum (Common ice plant) PE=2 SV=1	RecName: Full=Ribulose bisphosphate carboxylase small chain 3, chloroplastic; Short=RuBisCO small subunit 3; Flags: Precursor [Mesembryanthemum crystallinum]
c41603.graph_c0	6.24494	11.0912	8.70883	44.6627	48.8485	56.7375	2.88e-31	2.32172	up	5.15e-35	--	--	--	--	--	--	--	--	conserved hypothetical protein [Ricinus communis]
c12848.graph_c0	2.41349	1.75777	1.88699	5.0614	5.08116	4.07399	0.000354186	1.02669	up	6.28e-06	--	--	Molecular Function: sucrose alpha-glucosidase activity (GO:0004575);; Biological Process: ethylene biosynthetic process (GO:0009693);; Molecular Function: glycopeptide alpha-N-acetylgalactosaminidase activity (GO:0033926);;	--	--	--	Alkaline and neutral invertase;; Amylo-alpha-1,6-glucosidase	Alkaline/neutral invertase C, mitochondrial {ECO:0000305} (Precursor) OS=Arabidopsis thaliana (Mouse-ear cress) PE=1 SV=1	PREDICTED: alkaline/neutral invertase CINV2-like [Beta vulgaris subsp. vulgaris]
c35237.graph_c0	5.50756	5.38101	4.10988	14.2766	13.4554	13.7152	4.61e-10	1.26454	up	8.23e-13	[Q]	Secondary metabolites biosynthesis, transport and catabolism	Molecular Function: monooxygenase activity (GO:0004497);; Molecular Function: iron ion binding (GO:0005506);; Molecular Function: electron carrier activity (GO:0009055);; Molecular Function: oxidoreductase activity, acting on paired donors, with incorporation or reduction of molecular oxygen (GO:0016705);; Molecular Function: heme binding (GO:0020037);; Molecular Function: secologanin synthase ac…	--	[QI]	--	Cytochrome P450	Cytochrome P450 714A1 GN=F6A4.120 OS=Arabidopsis thaliana (Mouse-ear cress) PE=2 SV=1	PREDICTED: cytochrome P450 714A1-like [Beta vulgaris subsp. vulgaris]
c42992.graph_c0	17.9197	9.51206	10.1825	0.806282	2.53954	3.78538	0.000633422	-2.63096	down	1.3e-05	--	--	--	--	--	--	Protein of unknown function (DUF506)	--	PREDICTED: uncharacterized protein LOC104882998 [Beta vulgaris subsp. vulgaris]
c37947.graph_c0	0.248286	0.868399	0.238633	1.62487	1.97758	1.57878	6.88e-05	1.74053	up	8.19e-07	--	--	--	--	--	--	WRC;; QLQ;; CCCH zinc finger in TRM13 protein;; WRC;; QLQ;; CCCH zinc finger in TRM13 protein	Growth-regulating factor 12 OS=Oryza sativa subsp. japonica (Rice) PE=2 SV=1	PREDICTED: growth-regulating factor 9 [Beta vulgaris subsp. vulgaris]
c38672.graph_c0	5.41283	4.06126	3.65142	1.20969	0.995207	0.348943	8.48e-10	-2.55102	down	1.67e-12	[Q]	Secondary metabolites biosynthesis, transport and catabolism	Molecular Function: binding (GO:0005488);; Molecular Function: oxidoreductase activity (GO:0016491);;	--	[Q]	Secondary metabolites biosynthesis, transport and catabolism	Cytochrome P450	Geraniol 8-hydroxylase GN=CYP76B6 OS=Catharanthus roseus (Madagascar periwinkle) PE=1 SV=1	PREDICTED: geraniol 8-hydroxylase-like [Beta vulgaris subsp. vulgaris]
c41058.graph_c0	241.547	273.903	248.681	126.378	145.938	116.17	5.02e-18	-1.18156	down	2.39e-21	--	--	Molecular Function: DNA binding (GO:0003677);; Cellular Component: nucleus (GO:0005634);; Molecular Function: zinc ion binding (GO:0008270);; Biological Process: chloroplast organization (GO:0009658);; Biological Process: myo-inositol hexakisphosphate biosynthetic process (GO:0010264);; Biological Process: positive regulation of transcription, DNA-templated (GO:0045893);;	--	--	--	GATA-type transcription activator, N-terminal	--	PREDICTED: uncharacterized protein LOC104908518 [Beta vulgaris subsp. vulgaris]
c12362.graph_c0	2.30873	2.84872	2.34331	8.06183	6.80598	6.79188	0.0019012	1.33094	up	5.05e-05	--	--	--	--	--	--	--	--	PREDICTED: uncharacterized protein LOC104902106 [Beta vulgaris subsp. vulgaris]
c31655.graph_c0	0.210112	1.45092	0.294501	3.65874	4.2303	2.59787	0.000418118	2.23665	up	7.96e-06	--	--	Molecular Function: transferase activity (GO:0016740);;	--	--	--	SAM dependent carboxyl methyltransferase	Salicylate carboxymethyltransferase GN=SAMT OS=Clarkia breweri (Fairy fans) PE=1 SV=1	PREDICTED: salicylate carboxymethyltransferase-like [Beta vulgaris subsp. vulgaris]
c43793.graph_c0	0.682008	2.69731	0.994167	4.38499	4.43626	4.46923	0.00218732	1.40947	up	6.03e-05	--	--	--	--	--	--	--	Double-stranded RNA-binding protein 5 GN=DRB5 OS=Arabidopsis thaliana (Mouse-ear cress) PE=1 SV=1	PREDICTED: double-stranded RNA-binding protein 5 [Beta vulgaris subsp. vulgaris]
c42543.graph_c0	14.9217	13.2642	12.9705	9.11425	6.58906	6.26546	3.22e-08	-1.10168	down	1.11e-10	[M]	Cell wall/membrane/envelope biogenesis	Biological Process: glycolipid biosynthetic process (GO:0009247);; Molecular Function: transferase activity, transferring hexosyl groups (GO:0016758);; Molecular Function: carbohydrate binding (GO:0030246);; Biological Process: lipid glycosylation (GO:0030259);;	K03715|0.0|vvi:100248939|hypothetical protein LOC100248939	--	--	Monogalactosyldiacylglycerol (MGDG) synthase;; Glycosyltransferase family 28 C-terminal domain;; Glycosyl transferase family 1	Monogalactosyldiacylglycerol synthase 2, chloroplastic (Precursor) OS=Arabidopsis thaliana (Mouse-ear cress) PE=1 SV=1	PREDICTED: monogalactosyldiacylglycerol synthase 2, chloroplastic-like [Beta vulgaris subsp. vulgaris]
c28509.graph_c0	4.29587	15.4746	7.91365	24.1952	33.5193	26.5259	0.00137328	1.4029	up	3.35e-05	--	--	Cellular Component: extracellular region (GO:0005576);; Biological Process: syncytium formation (GO:0006949);; Biological Process: sexual reproduction (GO:0019953);;	--	--	--	Pollen allergen;; Rare lipoprotein A (RlpA)-like double-psi beta-barrel	Expansin-B3 (Precursor) GN=EXPB3 OS=Arabidopsis thaliana (Mouse-ear cress) PE=2 SV=2	PREDICTED: expansin-B3 [Beta vulgaris subsp. vulgaris]
c34119.graph_c0	1.23117	2.37664	1.13893	5.09581	3.94698	3.65338	0.00992452	1.22941	up	0.000461908	--	--	--	--	--	--	--	Transcription factor TCP20 GN=MOJ10.8 OS=Arabidopsis thaliana (Mouse-ear cress) PE=1 SV=1	PREDICTED: transcription factor TCP20 [Beta vulgaris subsp. vulgaris]
c40557.graph_c0	0.687538	1.03778	0.705753	1.67395	2.4616	2.54088	5.43e-05	1.2465	up	6.31e-07	[TDBLU]	--	Molecular Function: nucleotide binding (GO:0000166);; Biological Process: telomere maintenance (GO:0000723);; Biological Process: DNA recombination (GO:0006310);; Biological Process: cellular response to DNA damage stimulus (GO:0006974);; Biological Process: chromosome segregation (GO:0007059);; Biological Process: meiosis I (GO:0007127);; Molecular Function: kinase activity (GO:0016301);; Molecu…	K06640|0.0|vvi:100245131|hypothetical protein LOC100245131	[TBLD]	--	FAT domain;; UME (NUC010) domain	Serine/threonine-protein kinase ATR GN=ATR OS=Arabidopsis thaliana (Mouse-ear cress) PE=2 SV=2	PREDICTED: serine/threonine-protein kinase ATR isoform X2 [Beta vulgaris subsp. vulgaris]
c37789.graph_c0	5.22793	4.25972	4.94333	1.21913	1.35924	3.29057	2.3e-05	-1.51873	down	2.33e-07	[R]	General function prediction only	--	--	[QR]	--	non-haem dioxygenase in morphine synthesis N-terminal;; 2OG-Fe(II) oxygenase superfamily	Protein SRG1 GN=SRG1 OS=Arabidopsis thaliana (Mouse-ear cress) PE=2 SV=1	PREDICTED: protein SRG1-like [Beta vulgaris subsp. vulgaris]
c19743.graph_c0	1.8839	2.70533	2.21806	5.48851	7.76828	4.56396	0.00698468	1.18179	up	0.0002885	[C]	Energy production and conversion	Molecular Function: UDP-N-acetylmuramate dehydrogenase activity (GO:0008762);; Molecular Function: reticuline oxidase activity (GO:0050468);; Molecular Function: flavin adenine dinucleotide binding (GO:0050660);; Biological Process: oxidation-reduction process (GO:0055114);;	--	--	--	FAD binding domain;; Berberine and berberine like	Reticuline oxidase-like protein (Precursor) GN=At4g20830 OS=Arabidopsis thaliana (Mouse-ear cress) PE=1 SV=2	PREDICTED: reticuline oxidase-like protein [Beta vulgaris subsp. vulgaris]
c11039.graph_c0	18.1288	16.3617	14.9706	7.98911	5.4936	4.88995	6.5e-16	-1.62192	down	4.26e-19	[Q]	Secondary metabolites biosynthesis, transport and catabolism	Molecular Function: oxidoreductase activity (GO:0016491);; Molecular Function: metal ion binding (GO:0046872);;	--	[Q]	Secondary metabolites biosynthesis, transport and catabolism	Cytochrome P450	Cytochrome P450 71A4 GN=CYP71A4 OS=Solanum melongena (Eggplant) PE=2 SV=1	PREDICTED: cytochrome P450 71A4-like [Beta vulgaris subsp. vulgaris]
c33788.graph_c0	0.494633	2.27065	0.935951	3.42871	4.82615	4.47214	0.000957535	1.57991	up	2.2e-05	--	--	--	--	--	--	Trypsin and protease inhibitor	Miraculin (Precursor) OS=Synsepalum dulcificum (Miracle fruit) PE=1 SV=3	PREDICTED: miraculin-like [Beta vulgaris subsp. vulgaris]
c25630.graph_c0	3.04894	3.43501	2.26649	9.42969	7.31068	6.94212	0.000401309	1.24208	up	7.57e-06	[I]	Lipid transport and metabolism	Molecular Function: carboxylic ester hydrolase activity (GO:0052689);;	--	[V]	Defense mechanisms	alpha/beta hydrolase fold;; Carboxylesterase family	Carboxylesterase 1 GN=CXE1 OS=Actinidia eriantha (Velvet vine) PE=1 SV=1	PREDICTED: carboxylesterase 1-like [Beta vulgaris subsp. vulgaris]
c37866.graph_c0	3.15975	2.53935	2.77184	1.62	2.12619	0.884079	0.00785713	-1.07661	down	0.000334356	[RTKL]	--	Molecular Function: protein kinase activity (GO:0004672);; Biological Process: protein phosphorylation (GO:0006468);; Biological Process: response to oxidative stress (GO:0006979);; Biological Process: response to wounding (GO:0009611);; Biological Process: response to chitin (GO:0010200);; Molecular Function: protein kinase binding (GO:0019901);;	--	[R]	General function prediction only	Protein kinase domain;; Protein tyrosine kinase;; Kinase-like	Serine/threonine-protein kinase OXI1 GN=At3g25250 OS=Arabidopsis thaliana (Mouse-ear cress) PE=1 SV=1	PREDICTED: serine/threonine-protein kinase OXI1-like [Beta vulgaris subsp. vulgaris]
c34280.graph_c0	5.98335	6.53384	5.68731	13.0725	13.713	15.4564	6.36e-07	1.00757	up	3.44e-09	--	--	--	--	[K]	Transcription	CCAAT-binding transcription factor (CBF-B/NF-YA) subunit B	Nuclear transcription factor Y subunit A-3 OS=Arabidopsis thaliana (Mouse-ear cress) PE=2 SV=2	PREDICTED: nuclear transcription factor Y subunit A-7-like isoform X1 [Beta vulgaris subsp. vulgaris]
c38237.graph_c0	1062.04	957.89	1135.47	525.081	543.374	671.79	3.92e-12	-1.0691	down	4.67e-15	--	--	Biological Process: lipid transport (GO:0006869);; Molecular Function: lipid binding (GO:0008289);; Cellular Component: plasmodesma (GO:0009506);; Cellular Component: chloroplast thylakoid membrane (GO:0009535);; Cellular Component: apoplast (GO:0048046);;	--	--	--	Hydrophobic seed protein;; Protease inhibitor/seed storage/LTP family	36.4 kDa proline-rich protein GN=TPRP-F1 OS=Solanum lycopersicum (Tomato) PE=2 SV=1	PREDICTED: 36.4 kDa proline-rich protein [Beta vulgaris subsp. vulgaris]
c41989.graph_c0	29.0381	27.0866	27.575	19.0455	15.7423	12.5769	3.81e-09	-1.01933	down	9.97e-12	[P]	Inorganic ion transport and metabolism	Biological Process: cation transport (GO:0006812);; Molecular Function: cation transmembrane transporter activity (GO:0008324);; Cellular Component: integral component of membrane (GO:0016021);; Biological Process: transmembrane transport (GO:0055085);;	--	[P]	Inorganic ion transport and metabolism	Cation efflux family	Metal tolerance protein 4 OS=Oryza sativa subsp. japonica (Rice) PE=2 SV=1	PREDICTED: metal tolerance protein 4-like [Beta vulgaris subsp. vulgaris]
c42061.graph_c0	29.9354	30.4453	35.1343	8.14986	9.39074	9.72553	5.31e-37	-2.01937	down	6.32e-41	--	--	Molecular Function: transporter activity (GO:0005215);; Biological Process: transport (GO:0006810);; Cellular Component: integral component of membrane (GO:0016021);;	--	[GE]	--	Triose-phosphate Transporter family;; EamA-like transporter family;; UAA transporter family	Glucose-6-phosphate/phosphate translocator 2, chloroplastic (Precursor) GN=GPT2 OS=Arabidopsis thaliana (Mouse-ear cress) PE=2 SV=2	PREDICTED: glucose-6-phosphate/phosphate translocator 2, chloroplastic-like [Beta vulgaris subsp. vulgaris]
c35538.graph_c1	5.95251	9.97399	6.69916	15.4072	23.5895	28.0863	0.0025669	1.35501	up	7.35e-05	--	--	--	--	--	--	--	Sulfated surface glycoprotein 185 (Precursor) OS=Volvox carteri (Green alga) PE=1 SV=1	PREDICTED: uncharacterized protein LOC104891680 [Beta vulgaris subsp. vulgaris]
c34373.graph_c0	6.52624	8.22597	6.83199	18.1392	28.4903	16.7373	0.00384493	1.34429	up	0.000130666	[E]	Amino acid transport and metabolism	Molecular Function: asparagine synthase (glutamine-hydrolyzing) activity (GO:0004066);; Molecular Function: ATP binding (GO:0005524);; Biological Process: cellular amino acid catabolic process (GO:0009063);; Biological Process: response to absence of light (GO:0009646);; Biological Process: L-asparagine biosynthetic process (GO:0070981);;	K01953|0.0|vvi:100241610|hypothetical protein LOC100241610	[E]	Amino acid transport and metabolism	Asparagine synthase;; Glutamine amidotransferase domain;; Glutamine amidotransferase domain;; Aluminium induced protein;; Glutamine amidotransferases class-II	Asparagine synthetase [glutamine-hydrolyzing] GN=AS OS=Triphysaria versicolor (Yellow owl&apos;s clover) PE=2 SV=3	asparagine synthetase [glutamine-hydrolyzing]-like [Vitis vinifera]
c36311.graph_c0	2.17889	3.35121	1.36413	8.07475	9.26868	7.09426	1.55e-08	1.62784	up	4.98e-11	[Q]	Secondary metabolites biosynthesis, transport and catabolism	Molecular Function: monooxygenase activity (GO:0004497);; Molecular Function: oxidoreductase activity, acting on paired donors, with incorporation or reduction of molecular oxygen (GO:0016705);; Molecular Function: metal ion binding (GO:0046872);;	--	[Q]	Secondary metabolites biosynthesis, transport and catabolism	Cytochrome P450	Cytochrome P450 81D1 GN=T30G6.3 OS=Arabidopsis thaliana (Mouse-ear cress) PE=2 SV=1	PREDICTED: cytochrome P450 81E8-like [Beta vulgaris subsp. vulgaris]
c28942.graph_c0	15.1505	12.2634	13.9631	8.50674	6.26782	6.30294	8.9e-06	-1.17178	down	7.52e-08	--	--	--	--	--	--	--	--	PREDICTED: uncharacterized protein LOC104893653 [Beta vulgaris subsp. vulgaris]
c39664.graph_c0	0.707153	1.39838	0.832586	2.44383	2.85846	3.2132	0.00302306	1.33028	up	9.41e-05	--	--	Biological Process: single-organism developmental process (GO:0044767);; Biological Process: organ development (GO:0048513);;	--	[R]	General function prediction only	--	Zinc finger protein JACKDAW GN=F15A17.180 OS=Arabidopsis thaliana (Mouse-ear cress) PE=1 SV=1	PREDICTED: zinc finger protein JACKDAW [Beta vulgaris subsp. vulgaris]
c27522.graph_c0	180.881	196.201	200.537	88.1752	107.814	96.1564	4.59e-18	-1.1928	down	1.9e-21	--	--	--	--	--	--	--	--	hypothetical protein JCGZ_06806 [Jatropha curcas]
c27909.graph_c0	220.101	203.803	195.81	124.218	105.961	99.6871	4.99e-14	-1.10997	down	4.45e-17	[G]	Carbohydrate transport and metabolism	Molecular Function: starch synthase activity (GO:0009011);; Cellular Component: amyloplast (GO:0009501);; Cellular Component: chloroplast (GO:0009507);; Biological Process: starch biosynthetic process (GO:0019252);;	K13679|0.0|vvi:100264969|similar to granule-bound starch synthase	--	--	Starch synthase catalytic domain;; Glycosyl transferases group 1;; Glycosyl transferases group 1	Granule-bound starch synthase 1, chloroplastic/amyloplastic (Precursor) GN=WAXY OS=Antirrhinum majus (Garden snapdragon) PE=2 SV=1	PREDICTED: granule-bound starch synthase 1, chloroplastic/amyloplastic [Beta vulgaris subsp. vulgaris]
c32962.graph_c0	0.750696	0.905712	0.759561	1.73457	2.06004	1.83823	0.0050504	1.01454	up	0.000189668	--	--	--	--	[R]	General function prediction only	Reverse transcriptase (RNA-dependent DNA polymerase);; Integrase core domain;; gag-polypeptide of LTR copia-type;; gag-polypeptide of LTR copia-type	Endonuclease OS=Nicotiana tabacum (Common tobacco) PE=2 SV=1	PREDICTED: uncharacterized protein LOC104892028 [Beta vulgaris subsp. vulgaris]
c20125.graph_c0	4.61749	5.70188	5.0923	12.7507	13.3281	9.91261	3.74e-05	1.02159	up	4.03e-07	[G]	Carbohydrate transport and metabolism	Molecular Function: beta-galactosidase activity (GO:0004565);; Cellular Component: extracellular region (GO:0005576);; Cellular Component: cytosol (GO:0005829);; Biological Process: carbohydrate metabolic process (GO:0005975);; Cellular Component: plant-type cell wall (GO:0009505);; Cellular Component: plasmodesma (GO:0009506);; Molecular Function: carbohydrate binding (GO:0030246);; Biological P…	--	[G]	Carbohydrate transport and metabolism	Glycosyl hydrolases family 35;; Galactose binding lectin domain;; Beta-galactosidase jelly roll domain;; Glycosyl hydrolases family 2, sugar binding domain	Beta-galactosidase 1 (Precursor) GN=BGAL1 OS=Arabidopsis thaliana (Mouse-ear cress) PE=1 SV=1	PREDICTED: beta-galactosidase 1 [Beta vulgaris subsp. vulgaris]
c38566.graph_c0	0.447834	0.793798	0.310158	2.11717	2.03177	2.00313	3.31e-05	1.79192	up	3.5e-07	[R]	General function prediction only	Biological Process: pattern specification process (GO:0007389);; Biological Process: single-organism developmental process (GO:0044767);; Biological Process: meristem development (GO:0048507);;	--	[R]	General function prediction only	Alpha/beta hydrolase family;; Alpha/beta hydrolase family;; alpha/beta hydrolase fold	Guanine nucleotide-binding protein subunit gamma 3 (Precursor) GN=GG3 OS=Arabidopsis thaliana (Mouse-ear cress) PE=2 SV=1	PREDICTED: alpha/beta hydrolase domain-containing protein 17C [Beta vulgaris subsp. vulgaris]
c40298.graph_c0	0.680554	0.961271	0.536564	2.59804	3.7944	2.09048	0.00111653	1.75777	up	2.6e-05	[S]	Function unknown	--	--	--	--	Frigida-like protein	Factor of DNA methylation 5 {ECO:0000303|PubMed:22302148} OS=Arabidopsis thaliana (Mouse-ear cress) PE=2 SV=1	PREDICTED: trichohyalin-like isoform X2 [Beta vulgaris subsp. vulgaris]
c39497.graph_c0	84.0206	83.4979	86.4987	43.0613	35.359	49.8277	4.59e-18	-1.19122	down	1.91e-21	[R]	General function prediction only	Molecular Function: oxidoreductase activity (GO:0016491);;	--	[QR]	--	non-haem dioxygenase in morphine synthesis N-terminal;; 2OG-Fe(II) oxygenase superfamily	Protein SRG1 GN=SRG1 OS=Arabidopsis thaliana (Mouse-ear cress) PE=2 SV=1	PREDICTED: protein SRG1-like [Beta vulgaris subsp. vulgaris]
c28450.graph_c0	1.84517	2.44338	2.27914	7.69278	6.16188	7.00464	0.000158657	1.46689	up	2.33e-06	--	--	--	--	[D]	Cell cycle control, cell division, chromosome partitioning	--	--	PREDICTED: uncharacterized protein LOC104907900 isoform X2 [Beta vulgaris subsp. vulgaris]
c17368.graph_c0	3.95834	3.55403	3.90952	2.14552	2.26683	1.19509	0.00398213	-1.22759	down	0.000136514	[Q]	Secondary metabolites biosynthesis, transport and catabolism	--	--	[QI]	--	Cytochrome P450	Alkane hydroxylase MAH1 {ECO:0000303|PubMed:17905869} OS=Arabidopsis thaliana (Mouse-ear cress) PE=2 SV=1	PREDICTED: cytochrome P450 86B1-like isoform X1 [Beta vulgaris subsp. vulgaris]
c11560.graph_c0	30.0755	32.9116	36.4959	13.3136	16.2389	16.8101	2.98e-18	-1.31319	down	8.87e-22	--	--	--	--	[M]	Cell wall/membrane/envelope biogenesis	Pectinacetylesterase	--	PREDICTED: protein notum homolog [Beta vulgaris subsp. vulgaris]
c29809.graph_c0	12.9202	12.3949	11.2228	4.97255	5.86208	2.75622	3.74e-08	-1.62823	down	1.34e-10	--	--	--	K14488|8e-36|rcu:RCOM_1575070|Indole-3-acetic acid-induced protein ARG7, putative	--	--	Auxin responsive protein	Auxin-induced protein X15 OS=Glycine max (Soybean) PE=2 SV=1	PREDICTED: indole-3-acetic acid-induced protein ARG7 [Beta vulgaris subsp. vulgaris]
c31511.graph_c0	0.162706	0.574549	0.0684166	1.24227	1.77652	1.35792	7.16e-06	2.24853	up	5.71e-08	--	--	--	--	--	--	Arabidopsis phospholipase-like protein (PEARLI 4)	--	PREDICTED: uncharacterized protein LOC104894675 [Beta vulgaris subsp. vulgaris]
c35887.graph_c1	0.347063	1.85194	0.68104	2.97527	3.54756	2.95017	0.00314121	1.5223	up	9.89e-05	[K]	Transcription	--	--	--	--	Double-stranded RNA binding motif;; double strand RNA binding domain from DEAD END PROTEIN 1	Double-stranded RNA-binding protein 3 GN=DRB3 OS=Arabidopsis thaliana (Mouse-ear cress) PE=2 SV=1	PREDICTED: double-stranded RNA-binding protein 5 [Beta vulgaris subsp. vulgaris]
c34788.graph_c0	0.229387	0.264005	0.47156	1.0242	0.923677	1.18175	0.0037525	1.48583	up	0.000126792	[GEPR]	--	Cellular Component: plasma membrane (GO:0005886);;	--	--	--	Nodulin-like	--	PREDICTED: uncharacterized protein LOC104902902 [Beta vulgaris subsp. vulgaris]
c17615.graph_c0	2.4971	2.95486	3.01064	4.95507	7.3103	7.64352	0.000209937	1.01896	up	3.27e-06	--	--	--	--	--	--	Domain of unknown function (DUF239);; Domain of unknown function (DUF4409)	--	PREDICTED: uncharacterized protein LOC104897266 [Beta vulgaris subsp. vulgaris]
c38524.graph_c0	0.18727	0	0	1.78936	2.33959	4.76596	4.09e-05	5.34678	up	4.53e-07	--	--	--	--	--	--	--	Leucine-rich repeat extensin-like protein 3 (Precursor) GN=LRX3 OS=Arabidopsis thaliana (Mouse-ear cress) PE=1 SV=1	hydroxyproline-rich glycoprotein, extracellular matrix glycoprotein [Volvox carteri f. nagariensis]
c41409.graph_c0	62.4159	53.7438	47.2019	33.7228	29.6909	22.5121	5.89e-06	-1.12483	down	4.42e-08	--	--	Molecular Function: protein binding (GO:0005515);; Cellular Component: plasma membrane (GO:0005886);; Biological Process: transport (GO:0006810);; Biological Process: response to osmotic stress (GO:0006970);; Biological Process: response to metal ion (GO:0010038);; Biological Process: cell growth (GO:0016049);; Biological Process: regulation of microtubule polymerization or depolymerization (GO:0…	--	--	--	DREPP plasma membrane polypeptide	Plasma membrane-associated cation-binding protein 1 GN=F1C12.180 OS=Arabidopsis thaliana (Mouse-ear cress) PE=1 SV=1	PREDICTED: plasma membrane-associated cation-binding protein 1 [Beta vulgaris subsp. vulgaris]
c29560.graph_c1	22.6958	20.0565	18.6953	12.0667	11.1398	9.17398	0.000480518	-1.12484	down	9.32e-06	--	--	--	--	[R]	General function prediction only	--	--	PREDICTED: F-box/WD repeat-containing protein 11 [Beta vulgaris subsp. vulgaris]
c31352.graph_c0	0.702545	0.496166	0.369268	2.18794	3.75379	2.44305	3.71e-05	2.20637	up	3.97e-07	[G]	Carbohydrate transport and metabolism	Biological Process: metabolic process (GO:0008152);; Cellular Component: chloroplast (GO:0009507);; Molecular Function: transferase activity (GO:0016740);; Molecular Function: oxaloacetase activity (GO:0030603);; Molecular Function: metal ion binding (GO:0046872);; Molecular Function: citramalate lyase activity (GO:0047776);;	--	[C]	Energy production and conversion	Phosphoenolpyruvate phosphomutase;; Isocitrate lyase family	Petal death protein (Precursor) GN=PDP OS=Dianthus caryophyllus (Carnation) PE=1 SV=1	PREDICTED: petal death protein-like [Beta vulgaris subsp. vulgaris]
c37772.graph_c0	0.508952	0.599072	0.454771	1.91737	1.62573	1.35688	0.0025784	1.45238	up	7.45e-05	[GEPR]	--	Molecular Function: galactose transmembrane transporter activity (GO:0005354);; Cellular Component: plasma membrane (GO:0005886);; Biological Process: galactose transport (GO:0015757);; Cellular Component: integral component of membrane (GO:0016021);; Molecular Function: 2-alkenal reductase [NAD(P)] activity (GO:0032440);; Biological Process: transmembrane transport (GO:0055085);; Biological Proc…	--	[R]	General function prediction only	Sugar (and other) transporter;; Major Facilitator Superfamily;; Sugar (and other) transporter	Sugar transport protein 14 GN=STP14 OS=Arabidopsis thaliana (Mouse-ear cress) PE=2 SV=2	PREDICTED: sugar transport protein 14 [Beta vulgaris subsp. vulgaris]
c29945.graph_c0	8.35846	9.67815	11.2469	6.46881	4.25748	6.0285	0.00283002	-1.00593	down	8.46e-05	--	--	--	--	--	--	Reverse transcriptase-like	--	PREDICTED: uncharacterized protein LOC104883473 [Beta vulgaris subsp. vulgaris]
c21085.graph_c0	7.24339	5.56432	4.39234	2.17538	0.991916	0.49493	5.23e-06	-2.40598	down	3.77e-08	--	--	--	--	--	--	Phosphate-induced protein 1 conserved region	Protein EXORDIUM (Precursor) GN=EXO OS=Arabidopsis thaliana (Mouse-ear cress) PE=2 SV=1	PREDICTED: protein EXORDIUM-like [Beta vulgaris subsp. vulgaris]
c36094.graph_c0	4.46959	3.23568	3.58503	1.80647	1.51248	2.1083	0.000250712	-1.26319	down	4.13e-06	--	--	Biological Process: ceramide metabolic process (GO:0006672);; Cellular Component: integral component of membrane (GO:0016021);;	--	--	--	Protein of unknown function (DUF616)	--	PREDICTED: uncharacterized protein LOC104902991 [Beta vulgaris subsp. vulgaris]
c12495.graph_c0	0.69389	1.23142	0.85288	4.84746	8.85348	4.82591	0.000220676	2.52724	up	3.48e-06	[R]	General function prediction only	Biological Process: glutamine metabolic process (GO:0006541);; Molecular Function: hydrolase activity (GO:0016787);;	--	--	--	Peptidase C26;; Glutamine amidotransferase class-I	--	PREDICTED: uncharacterized protein LOC104906390 isoform X1 [Beta vulgaris subsp. vulgaris]
c42593.graph_c0	3.03311	3.48214	4.71722	24.5437	19.1889	12.8688	0.00128233	2.13615	up	3.06e-05	--	--	--	--	--	--	Aluminium induced protein	Stem-specific protein TSJT1 GN=TSJT1 OS=Nicotiana tabacum (Common tobacco) PE=2 SV=1	PREDICTED: stem-specific protein TSJT1-like [Beta vulgaris subsp. vulgaris]
c40972.graph_c0	104.431	113.143	98.055	296.615	375.37	575.333	0.00140374	1.7677	up	3.46e-05	--	--	--	--	--	--	Trypsin and protease inhibitor	Miraculin (Precursor) OS=Synsepalum dulcificum (Miracle fruit) PE=1 SV=3	PREDICTED: miraculin-like [Beta vulgaris subsp. vulgaris]
c37386.graph_c0	1.52363	1.61407	1.05711	0.367358	0.637118	0.812409	0.00405784	-1.42403	down	0.000141283	--	--	--	K12386|1e-107|vvi:100250884|hypothetical protein LOC100250884	[E]	Amino acid transport and metabolism	PQ loop repeat;; PQ loop repeat	Cystinosin homolog GN=At5g40670 OS=Arabidopsis thaliana (Mouse-ear cress) PE=2 SV=1	PREDICTED: cystinosin homolog [Beta vulgaris subsp. vulgaris]
c43069.graph_c0	3.51488	3.86993	2.86501	12.6468	8.6428	8.42432	0.00527768	1.34343	up	0.000199774	--	--	--	--	--	--	--	Protein EARLY RESPONSIVE TO DEHYDRATION 15 OS=Arabidopsis thaliana (Mouse-ear cress) PE=1 SV=1	PREDICTED: protein EARLY RESPONSIVE TO DEHYDRATION 15-like [Beta vulgaris subsp. vulgaris]
c36657.graph_c0	1.27327	2.48678	1.22944	3.96061	7.71256	5.18207	0.00951083	1.54639	up	0.000435295	[O]	Posttranslational modification, protein turnover, chaperones	Molecular Function: nucleotide binding (GO:0000166);; Molecular Function: hydrolase activity (GO:0016787);;	--	[O]	Posttranslational modification, protein turnover, chaperones	Domain associated at C-terminal with AAA;; ATPase family associated with various cellular activities (AAA);; Holliday junction DNA helicase ruvB N-terminus	26S protease regulatory subunit 8 homolog B GN=F28I16.150 OS=Arabidopsis thaliana (Mouse-ear cress) PE=1 SV=1	PREDICTED: uncharacterized protein LOC104895068 isoform X2 [Beta vulgaris subsp. vulgaris]
c37083.graph_c0	4.57848	3.64317	3.2821	2.02315	2.245	1.89568	0.000120448	-1.10581	down	1.67e-06	[RTKL]	--	Molecular Function: nucleotide binding (GO:0000166);; Molecular Function: transferase activity, transferring phosphorus-containing groups (GO:0016772);;	--	[T]	Signal transduction mechanisms	Protein kinase domain;; Protein tyrosine kinase;; Kinase-like	Mitogen-activated protein kinase kinase kinase YODA GN=YDA OS=Arabidopsis thaliana (Mouse-ear cress) PE=1 SV=1	PREDICTED: mitogen-activated protein kinase kinase kinase YODA [Beta vulgaris subsp. vulgaris]
c27857.graph_c0	1.01864	0.893057	0.827121	0.197611	0.261121	0.716595	0.00459427	-1.44374	down	0.000167343	--	--	Cellular Component: cytosol (GO:0005829);; Biological Process: N-terminal protein myristoylation (GO:0006499);; Biological Process: intracellular protein transport (GO:0006886);; Biological Process: retrograde vesicle-mediated transport, Golgi to ER (GO:0006890);; Cellular Component: plasmodesma (GO:0009506);; Cellular Component: COPI vesicle coat (GO:0030126);; Cellular Component: clathrin adapt…	--	[U]	Intracellular trafficking, secretion, and vesicular transport	--	Coatomer subunit delta GN=At5g05010 OS=Arabidopsis thaliana (Mouse-ear cress) PE=1 SV=2	unnamed protein product [Vitis vinifera]
c32901.graph_c1	0.602395	0.405177	0.6031	1.79823	1.67931	1.30342	0.00438543	1.36527	up	0.000156604	--	--	Molecular Function: catalytic activity (GO:0003824);; Biological Process: metabolic process (GO:0008152);; Biological Process: response to karrikin (GO:0080167);;	--	--	--	Raffinose synthase or seed imbibition protein Sip1	Probable galactinol--sucrose galactosyltransferase 2 GN=T8H10.120 OS=Arabidopsis thaliana (Mouse-ear cress) PE=2 SV=2	PREDICTED: probable galactinol--sucrose galactosyltransferase 2 [Beta vulgaris subsp. vulgaris]
c31920.graph_c0	0.426985	1.40726	0.598479	5.00448	7.2411	3.36558	0.000905203	2.48444	up	2.06e-05	[S]	Function unknown	Biological Process: metabolic process (GO:0008152);; Molecular Function: oxidoreductase activity (GO:0016491);;	--	--	--	Leucine rich repeat;; Leucine Rich Repeat;; Leucine Rich repeats (2 copies);; Leucine Rich repeat;; Leucine rich repeat;; Leucine rich repeat N-terminal domain	Polygalacturonase inhibitor (Precursor) GN=PGIP OS=Pyrus communis (Pear) PE=1 SV=1	putative polygalacturonase-inhibiting protein [Rubus idaeus]
c36645.graph_c0	17.3403	24.1514	14.3888	35.0525	53.2107	58.4197	0.00136303	1.18095	up	3.32e-05	--	--	Cellular Component: extracellular region (GO:0005576);; Biological Process: plant-type cell wall organization (GO:0009664);; Cellular Component: membrane (GO:0016020);;	--	--	--	Pollen allergen;; Rare lipoprotein A (RlpA)-like double-psi beta-barrel	Expansin-A8 (Precursor) GN=T2P4.4 OS=Arabidopsis thaliana (Mouse-ear cress) PE=2 SV=1	PREDICTED: expansin-A2-like [Beta vulgaris subsp. vulgaris]
c26998.graph_c0	1.04633	0.454747	0.507663	1.9406	2.01938	1.71665	0.00798394	1.29258	up	0.000343078	[T]	Signal transduction mechanisms	Molecular Function: hydrolase activity (GO:0016787);;	K14497|1e-120|pop:POPTR_422871|hypothetical protein	[T]	Signal transduction mechanisms	Protein phosphatase 2C;; Protein phosphatase 2C	Probable protein phosphatase 2C 8 GN=OSJNBa0049H05.30 OS=Oryza sativa subsp. japonica (Rice) PE=2 SV=1	PREDICTED: probable protein phosphatase 2C 8 [Beta vulgaris subsp. vulgaris]
c40993.graph_c0	222.023	215.964	238.933	104.807	127.143	117.991	1.41e-16	-1.16228	down	8.38e-20	--	--	Molecular Function: iron ion binding (GO:0005506);; Biological Process: fatty acid biosynthetic process (GO:0006633);; Cellular Component: integral component of membrane (GO:0016021);; Biological Process: carotenoid biosynthetic process (GO:0016117);; Molecular Function: oxidoreductase activity (GO:0016491);; Molecular Function: hydrolase activity (GO:0016787);; Cellular Component: chloroplast me…	K02294|1e-150|vvi:100268009|hypothetical protein LOC100268009	--	--	Fatty acid hydroxylase superfamily	Beta-carotene hydroxylase 2, chloroplastic (Precursor; Fragment) GN=CA2 OS=Capsicum annuum (Bell pepper) PE=2 SV=1	PREDICTED: beta-carotene 3-hydroxylase, chloroplastic [Beta vulgaris subsp. vulgaris]
c26707.graph_c0	0.847822	0.997945	0.80213	3.57728	2.51121	2.45687	0.00163261	1.4968	up	4.16e-05	--	--	--	--	--	--	GRAM domain	GEM-like protein 4 GN=At5g08350 OS=Arabidopsis thaliana (Mouse-ear cress) PE=2 SV=1	PREDICTED: GEM-like protein 4 [Beta vulgaris subsp. vulgaris]
c44129.graph_c0	0.839321	0.418421	0.373688	2.1427	2.52331	1.78555	0.000201399	1.77761	up	3.1e-06	--	--	--	--	--	--	Rare lipoprotein A (RlpA)-like double-psi beta-barrel;; Pollen allergen	Expansin-like B1 (Precursor) GN=dl4545c OS=Arabidopsis thaliana (Mouse-ear cress) PE=2 SV=2	PREDICTED: expansin-like B1 [Beta vulgaris subsp. vulgaris]
c28861.graph_c0	0.831378	1.90612	1.03356	3.63136	6.91937	6.30168	0.000240276	1.94764	up	3.87e-06	--	--	--	--	[K]	Transcription	Helix-loop-helix DNA-binding domain	Transcription factor bHLH106 GN=T3K9.10 OS=Arabidopsis thaliana (Mouse-ear cress) PE=2 SV=1	PREDICTED: transcription factor bHLH30-like [Beta vulgaris subsp. vulgaris]
c11102.graph_c0	39.1714	32.5969	32.1416	24.593	18.3923	13.132	0.000295108	-1.08248	down	5.01e-06	--	--	Molecular Function: DNA binding (GO:0003677);; Molecular Function: sequence-specific DNA binding transcription factor activity (GO:0003700);; Cellular Component: nucleus (GO:0005634);; Biological Process: regulation of transcription, DNA-templated (GO:0006355);;	--	--	--	AP2 domain	Ethylene-responsive transcription factor 1A OS=Arabidopsis thaliana (Mouse-ear cress) PE=1 SV=2	PREDICTED: ethylene-responsive transcription factor 2 [Beta vulgaris subsp. vulgaris]
c36443.graph_c0	1.33521	1.78362	1.04455	4.06777	6.37678	4.40555	2.08e-05	1.627	up	2.08e-07	[R]	General function prediction only	--	--	--	--	Alpha/beta hydrolase family;; alpha/beta hydrolase fold;; Alpha/beta hydrolase family	--	PREDICTED: uncharacterized protein LOC104898375 [Beta vulgaris subsp. vulgaris]
c25932.graph_c0	3.38278	8.19852	5.9229	12.7913	18.6286	17.2015	0.000240276	1.26444	up	3.84e-06	--	--	Molecular Function: transferase activity, transferring acyl groups other than amino-acyl groups (GO:0016747);;	--	--	--	Transferase family	Omega-hydroxypalmitate O-feruloyl transferase GN=MEE6.11 OS=Arabidopsis thaliana (Mouse-ear cress) PE=1 SV=1	PREDICTED: omega-hydroxypalmitate O-feruloyl transferase [Beta vulgaris subsp. vulgaris]
c40774.graph_c0	1.00472	1.35851	0.866622	2.00837	3.20786	3.05788	0.00621487	1.14547	up	0.000246346	--	--	--	--	--	--	Cotton fibre expressed protein;; Late expression factor 8 (LEF-8)	--	PREDICTED: uncharacterized protein LOC104905288 [Beta vulgaris subsp. vulgaris]
c29979.graph_c0	261.506	236.59	247.697	135.109	144.197	139.352	4.69e-13	-1.04024	down	4.75e-16	--	--	--	--	--	--	--	Lysine-rich arabinogalactan protein 18 (Precursor) GN=AGP18 OS=Arabidopsis thaliana (Mouse-ear cress) PE=2 SV=1	PREDICTED: skin secretory protein xP2 [Beta vulgaris subsp. vulgaris]
c41319.graph_c0	69.3612	66.5669	59.7463	27.448	42.3873	33.2664	7.67e-16	-1.137	down	5.48e-19	--	--	--	--	--	--	Thioredoxin;; DSBA-like thioredoxin domain	--	PREDICTED: uncharacterized protein LOC104905824 [Beta vulgaris subsp. vulgaris]
c34373.graph_c1	5.69298	4.47867	5.81797	14.6529	21.5624	13.6992	0.000218772	1.42936	up	3.44e-06	[E]	Amino acid transport and metabolism	Molecular Function: asparagine synthase (glutamine-hydrolyzing) activity (GO:0004066);; Molecular Function: ATP binding (GO:0005524);; Biological Process: cellular amino acid catabolic process (GO:0009063);; Biological Process: response to absence of light (GO:0009646);; Biological Process: L-asparagine biosynthetic process (GO:0070981);;	K01953|4e-72|vvi:100241610|hypothetical protein LOC100241610	[E]	Amino acid transport and metabolism	--	Asparagine synthetase [glutamine-hydrolyzing] OS=Brassica oleracea (Wild cabbage) PE=2 SV=2	PREDICTED: asparagine synthetase [glutamine-hydrolyzing] 1-like [Beta vulgaris subsp. vulgaris]
c33995.graph_c0	4.51786	4.16375	4.68867	1.82836	2.3224	2.28787	0.000252906	-1.26656	down	4.2e-06	--	--	Cellular Component: cell wall (GO:0005618);; Molecular Function: pectinesterase activity (GO:0030599);; Biological Process: cell wall modification (GO:0042545);; Molecular Function: aspartyl esterase activity (GO:0045330);;	K01051|1e-143|pop:POPTR_245492|hypothetical protein	--	--	Pectinesterase	Probable pectinesterase 53 (Precursor) GN=T29J13.150 OS=Arabidopsis thaliana (Mouse-ear cress) PE=2 SV=1	PREDICTED: probable pectinesterase 53 [Beta vulgaris subsp. vulgaris]
c37921.graph_c0	0.445565	0.503482	0.637011	1.82629	1.20071	1.69404	0.00843763	1.37248	up	0.000369598	[L]	Replication, recombination and repair	--	--	[R]	General function prediction only	Reverse transcriptase-like;; RNase H	--	PREDICTED: uncharacterized protein LOC104896463 [Beta vulgaris subsp. vulgaris]
c27971.graph_c0	5.54908	3.29597	4.16412	1.7839	1.74526	1.26665	0.000557385	-1.64323	down	1.12e-05	--	--	--	--	--	--	Protein of unknown function, DUF538	--	PREDICTED: uncharacterized protein LOC104892619 [Beta vulgaris subsp. vulgaris]
c42478.graph_c0	6.02976	8.98304	7.11444	23.4347	23.6668	18.694	2.3e-06	1.37178	up	1.55e-08	--	--	--	--	--	--	--	--	PREDICTED: uncharacterized protein LOC104221529 [Nicotiana sylvestris]
c20079.graph_c0	0.809397	4.2748	2.36762	8.62626	7.58666	11.128	0.000663534	1.67639	up	1.41e-05	--	--	--	--	--	--	Protein of unknown function (DUF1298);; Wax ester synthase-like Acyl-CoA acyltransferase domain	O-acyltransferase WSD1 GN=WSD1 OS=Arabidopsis thaliana (Mouse-ear cress) PE=2 SV=1	PREDICTED: O-acyltransferase WSD1-like [Beta vulgaris subsp. vulgaris]
c40061.graph_c1	7.0997	9.69169	13.0234	1.41692	1.41688	1.50231	5.99e-07	-2.9905	down	3.21e-09	--	--	Molecular Function: hydrolase activity (GO:0016787);;	K07107|1e-49|rcu:RCOM_1308960|acyl-CoA thioesterase, putative	--	--	Thioesterase-like superfamily;; Thioesterase superfamily	--	PREDICTED: uncharacterized protein LOC104896436 [Beta vulgaris subsp. vulgaris]
c23166.graph_c0	0.280302	0.989805	0.412526	1.74589	2.6698	1.68954	0.00566353	1.65837	up	0.000218762	--	--	--	--	--	--	--	--	PREDICTED: ENHANCER OF AG-4 protein 2-like [Beta vulgaris subsp. vulgaris]
c40146.graph_c1	2.80472	3.72152	3.21644	7.746	9.26409	7.49522	1.46e-05	1.1247	up	1.37e-07	[RTKL]	--	--	--	--	--	Protein tyrosine kinase;; Protein kinase domain;; Wall-associated receptor kinase galacturonan-binding;; Calcium-binding EGF domain;; Complement Clr-like EGF-like;; EGF-like domain	Wall-associated receptor kinase 5 (Precursor) GN=WAK5 OS=Arabidopsis thaliana (Mouse-ear cress) PE=2 SV=1	PREDICTED: uncharacterized protein LOC104888972 [Beta vulgaris subsp. vulgaris]
c24234.graph_c0	0.526743	0.859752	0.767836	1.60869	3.06736	2.24691	0.00425818	1.46819	up	0.000151136	--	--	--	--	--	--	Protein of unknown function DUF260;; WRKY DNA -binding domain	LOB domain-containing protein 18 GN=F4L23.7 OS=Arabidopsis thaliana (Mouse-ear cress) PE=2 SV=2	PREDICTED: probable WRKY transcription factor 48 [Beta vulgaris subsp. vulgaris]
c36675.graph_c0	0.886085	0.770204	0.63054	1.94469	2.09014	2.24382	0.00838868	1.25045	up	0.000364225	[O]	Posttranslational modification, protein turnover, chaperones	--	--	--	--	PDZ domain;; PDZ domain (Also known as DHR or GLGF)	--	PREDICTED: uncharacterized protein LOC104903079 [Beta vulgaris subsp. vulgaris]
c36906.graph_c0	2.26408	1.99991	1.87035	9.22692	6.31163	7.95216	2.07e-06	1.73913	up	1.38e-08	--	--	Biological Process: transmembrane transport (GO:0055085);;	--	[T]	Signal transduction mechanisms	OPT oligopeptide transporter protein	Oligopeptide transporter 7 GN=OPT7 OS=Arabidopsis thaliana (Mouse-ear cress) PE=2 SV=1	PREDICTED: oligopeptide transporter 6 [Beta vulgaris subsp. vulgaris]
c37537.graph_c0	2.41329	5.89053	2.85738	8.98313	10.8291	10.4827	0.000130601	1.239	up	1.83e-06	--	--	Molecular Function: sesquiterpene synthase activity (GO:0010334);; Biological Process: geranyl diphosphate metabolic process (GO:0033383);;	--	--	--	Terpene synthase family, metal binding domain;; Terpene synthase, N-terminal domain	Probable sesquiterpene synthase GN=STPS OS=Santalum murrayanum (Bitter quandong) PE=3 SV=1	drimenol synthase [Persicaria hydropiper]
c42214.graph_c0	4.26504	11.8295	6.26065	15.9547	23.131	19.919	0.00505714	1.19495	up	0.000190222	--	--	--	--	--	--	--	Growth-regulating factor 1 GN=GRF1 OS=Oryza sativa subsp. indica (Rice) PE=2 SV=1	PREDICTED: growth-regulating factor 1 [Beta vulgaris subsp. vulgaris]
c17611.graph_c0	1.28125	3.47325	2.38359	5.61671	10.7514	10.1531	0.00264741	1.67881	up	7.8e-05	--	--	--	--	--	--	--	Probable membrane-associated kinase regulator 2 GN=MAKR2 OS=Arabidopsis thaliana (Mouse-ear cress) PE=2 SV=1	PREDICTED: probable membrane-associated kinase regulator 2 [Beta vulgaris subsp. vulgaris]
c31464.graph_c0	10.8465	9.98921	10.926	3.03347	3.32276	2.17374	1.36e-15	-2.10079	down	1.05e-18	[R]	General function prediction only	Molecular Function: hydrolase activity (GO:0016787);;	--	[I]	Lipid transport and metabolism	Phospholipase/Carboxylesterase;; Alpha/beta hydrolase family;; Serine hydrolase (FSH1)	--	PREDICTED: acyl-protein thioesterase 2 [Beta vulgaris subsp. vulgaris]
c33849.graph_c0	1.76975	2.05861	1.3716	0.390444	0.386948	0.579219	2.35e-06	-2.14519	down	1.62e-08	--	--	--	--	--	--	--	--	PREDICTED: uncharacterized protein LOC104898613 [Beta vulgaris subsp. vulgaris]
c10897.graph_c0	9.14736	7.03449	7.56457	3.30824	3.61255	3.9585	0.00062785	-1.33577	down	1.29e-05	--	--	--	--	--	--	--	--	PREDICTED: uncharacterized protein LOC104889676 [Beta vulgaris subsp. vulgaris]
c40376.graph_c0	0.179339	0.713029	0.184337	1.42531	3.11078	2.0326	0.00221712	2.40418	up	6.12e-05	[GER]	--	--	--	--	--	EamA-like transporter family;; EamA-like transporter family	WAT1-related protein At3g30340 GN=At3g30340 OS=Arabidopsis thaliana (Mouse-ear cress) PE=2 SV=1	PREDICTED: WAT1-related protein At3g30340-like isoform X1 [Beta vulgaris subsp. vulgaris]
c31844.graph_c0	5.88276	4.43851	5.43896	2.90723	2.34279	1.52474	3.93e-05	-1.41473	down	4.28e-07	--	--	--	--	[S]	Function unknown	Armadillo/beta-catenin-like repeat	U-box domain-containing protein 45 GN=PUB45 OS=Arabidopsis thaliana (Mouse-ear cress) PE=1 SV=1	PREDICTED: U-box domain-containing protein 4 [Beta vulgaris subsp. vulgaris]
c34602.graph_c0	21.773	22.5084	20.5399	10.3851	11.3917	10.4025	3.39e-09	-1.21627	down	8.47e-12	--	--	Biological Process: metal ion transport (GO:0030001);; Molecular Function: metal ion binding (GO:0046872);;	--	[P]	Inorganic ion transport and metabolism	--	--	hypothetical protein VITISV_019514 [Vitis vinifera]
c33977.graph_c0	2.92351	2.57775	2.81624	5.89535	7.87827	5.91494	0.000462311	1.03258	up	8.86e-06	--	--	Biological Process: metal ion transport (GO:0030001);; Molecular Function: metal ion binding (GO:0046872);;	--	[P]	Inorganic ion transport and metabolism	Heavy-metal-associated domain	Vegetative cell wall protein gp1 (Precursor) GN=GP1 OS=Chlamydomonas reinhardtii (Chlamydomonas smithii) PE=1 SV=1	PREDICTED: pollen-specific leucine-rich repeat extensin-like protein 1 [Beta vulgaris subsp. vulgaris]
c39268.graph_c2	79.9249	54.9466	52.739	24.0966	31.8072	31.2688	0.000676567	-1.31796	down	1.44e-05	--	--	--	--	--	--	--	Protein SULFUR DEFICIENCY-INDUCED 1 {ECO:0000303|PubMed:19154231} OS=Arabidopsis thaliana (Mouse-ear cress) PE=2 SV=1	PREDICTED: protein SULFUR DEFICIENCY-INDUCED 1 [Beta vulgaris subsp. vulgaris]
c25880.graph_c0	10.6145	10.5046	15.6359	2.9885	2.63864	3.88706	1.33e-06	-2.16091	down	8.06e-09	--	--	Cellular Component: membrane (GO:0016020);;	--	[GE]	--	--	Glucose-6-phosphate/phosphate translocator 2, chloroplastic (Precursor) GN=GPT2 OS=Arabidopsis thaliana (Mouse-ear cress) PE=2 SV=2	plastidic glucose 6-phoaphate/phosphate translocator2 [Mesembryanthemum crystallinum]
c41914.graph_c0	28.7218	25.0357	31.5048	12.1181	17.1731	19.1172	2.07e-06	-1.03384	down	1.38e-08	[G]	Carbohydrate transport and metabolism	--	--	[R]	General function prediction only	Strictosidine synthase;; SMP-30/Gluconolaconase/LRE-like region	Protein STRICTOSIDINE SYNTHASE-LIKE 10 {ECO:0000303|PubMed:10777701} (Precursor) OS=Arabidopsis thaliana (Mouse-ear cress) PE=2 SV=1	PREDICTED: strictosidine synthase 3-like [Beta vulgaris subsp. vulgaris]
c12464.graph_c0	0.402813	0.812809	0.774306	13.7819	11.3897	3.73535	0.00785225	3.67212	up	0.000333213	--	--	--	--	--	--	AP2 domain	Ethylene-responsive transcription factor ERF017 GN=ERF017 OS=Arabidopsis thaliana (Mouse-ear cress) PE=2 SV=1	PREDICTED: ethylene-responsive transcription factor ERF017-like [Beta vulgaris subsp. vulgaris]
c40560.graph_c0	8.12415	6.37884	7.98759	2.93152	5.2603	1.80105	0.000265695	-1.38349	down	4.43e-06	[Q]	Secondary metabolites biosynthesis, transport and catabolism	Molecular Function: binding (GO:0005488);; Molecular Function: oxidoreductase activity (GO:0016491);;	--	[QI]	--	Cytochrome P450	Alkane hydroxylase MAH1 {ECO:0000303|PubMed:17905869} OS=Arabidopsis thaliana (Mouse-ear cress) PE=2 SV=1	PREDICTED: cytochrome P450 86B1-like isoform X1 [Beta vulgaris subsp. vulgaris]
c35969.graph_c0	8.33953	6.45481	5.76473	3.69925	4.0012	3.25858	0.000176615	-1.11218	down	2.65e-06	[V]	Defense mechanisms	Molecular Function: carbohydrate binding (GO:0030246);;	--	--	--	Phloem protein 2	F-box protein PP2-A13 GN=T27I15.150 OS=Arabidopsis thaliana (Mouse-ear cress) PE=1 SV=1	PREDICTED: F-box protein PP2-A13 isoform X1 [Beta vulgaris subsp. vulgaris]
c18282.graph_c0	371.359	331.06	273.957	177.99	155.376	157.491	2.4e-08	-1.19276	down	8e-11	--	--	Cellular Component: cell wall (GO:0005618);; Biological Process: response to hormone (GO:0009725);; Biological Process: unidimensional cell growth (GO:0009826);; Biological Process: regulation of hormone levels (GO:0010817);; Biological Process: carboxylic acid metabolic process (GO:0019752);; Biological Process: response to lipid (GO:0033993);; Biological Process: indole-containing compound meta…	--	--	--	Gibberellin regulated protein	Gibberellin-regulated protein 1 (Precursor) GN=GASA1 OS=Arabidopsis thaliana (Mouse-ear cress) PE=2 SV=2	PREDICTED: gibberellin-regulated protein 1-like [Beta vulgaris subsp. vulgaris]
c33933.graph_c0	80.128	55.8665	70.6562	27.4462	33.4267	31.6933	9.58e-07	-1.37069	down	5.53e-09	--	--	Biological Process: lipid metabolic process (GO:0006629);; Molecular Function: hydrolase activity, acting on ester bonds (GO:0016788);;	--	--	--	GDSL-like Lipase/Acylhydrolase	GDSL esterase/lipase At5g45670 (Precursor) GN=At5g45670 OS=Arabidopsis thaliana (Mouse-ear cress) PE=2 SV=1	PREDICTED: GDSL esterase/lipase At5g45670 [Beta vulgaris subsp. vulgaris]
c31844.graph_c1	6.48156	5.99816	4.51107	3.4129	2.90762	1.4508	0.00647657	-1.31999	down	0.000262863	--	--	--	--	[S]	Function unknown	--	--	PREDICTED: U-box domain-containing protein 4 [Beta vulgaris subsp. vulgaris]
c41831.graph_c0	32.4135	34.2048	32.6352	14.506	16.7023	17.7835	3.52e-09	-1.22785	down	9.01e-12	--	--	--	--	--	--	--	Transcription factor PAR1 GN=F7D19.13 OS=Arabidopsis thaliana (Mouse-ear cress) PE=1 SV=1	PREDICTED: transcription factor PAR1 [Vitis vinifera]
c44461.graph_c0	0.150968	0.81234	0.290197	1.62931	2.5051	2.17992	2.36e-06	2.13102	up	1.64e-08	[C]	Energy production and conversion	Molecular Function: malate synthase activity (GO:0004474);; Cellular Component: nucleus (GO:0005634);; Biological Process: glyoxylate cycle (GO:0006097);; Biological Process: tricarboxylic acid cycle (GO:0006099);; Cellular Component: glyoxysome (GO:0009514);;	K01638|0.0|ath:AT5G03860|MLS	[C]	Energy production and conversion	Malate synthase	Malate synthase, glyoxysomal (Fragment) OS=Glycine max (Soybean) PE=2 SV=1	PREDICTED: malate synthase, glyoxysomal [Beta vulgaris subsp. vulgaris]
c31693.graph_c0	0.142469	0.447188	0.319503	1.48851	3.17731	1.9817	0.00064389	2.65625	up	1.33e-05	--	--	Molecular Function: protein kinase activity (GO:0004672);; Biological Process: cellular process (GO:0009987);;	--	--	--	Salt stress response/antifungal	Cysteine-rich receptor-like protein kinase 25 (Precursor) GN=CRK25 OS=Arabidopsis thaliana (Mouse-ear cress) PE=3 SV=1	ATP binding protein, putative [Ricinus communis]
c29331.graph_c1	5.35425	4.54756	3.13433	15.2298	14.4872	13.9217	9.5e-09	1.54213	up	2.92e-11	--	--	--	--	[R]	General function prediction only	--	Zinc finger CCCH domain-containing protein 49 GN=At4g29190 OS=Arabidopsis thaliana (Mouse-ear cress) PE=2 SV=1	PREDICTED: zinc finger CCCH domain-containing protein 23-like [Beta vulgaris subsp. vulgaris]
c16824.graph_c0	0.567064	2.97026	0.447086	5.09864	9.84718	5.81719	0.00704154	2.18421	up	0.000291686	--	--	Molecular Function: sequence-specific DNA binding transcription factor activity (GO:0003700);; Cellular Component: nucleus (GO:0005634);; Biological Process: regulation of transcription, DNA-templated (GO:0006355);; Molecular Function: sequence-specific DNA binding (GO:0043565);;	--	[K]	Transcription	KNOX2 domain;; KNOX1 domain;; Homeobox KN domain;; ELK domain;; Homeobox domain	Homeobox protein knotted-1-like 6 GN=KNAT6 OS=Arabidopsis thaliana (Mouse-ear cress) PE=1 SV=1	PREDICTED: homeobox protein knotted-1-like 6 isoform X1 [Beta vulgaris subsp. vulgaris]
c40597.graph_c0	0.387384	0.713705	0.750719	1.59729	1.73726	2.07727	0.00138227	1.33739	up	3.39e-05	[L]	Replication, recombination and repair	--	--	--	--	--	Leucine-rich repeat extensin-like protein 2 (Precursor) GN=LRX2 OS=Arabidopsis thaliana (Mouse-ear cress) PE=2 SV=1	PREDICTED: uncharacterized protein LOC104890237 [Beta vulgaris subsp. vulgaris]
c32029.graph_c0	2.55567	3.38701	1.56552	5.52795	8.6784	6.14421	0.00275178	1.2324	up	8.21e-05	[C]	Energy production and conversion	--	--	[C]	Energy production and conversion	Aldo/keto reductase family	Probable aldo-keto reductase 2 OS=Oryza sativa subsp. japonica (Rice) PE=2 SV=2	PREDICTED: auxin-induced protein PCNT115-like [Beta vulgaris subsp. vulgaris]
c41094.graph_c0	123.499	105.512	93.5703	63.4657	58.3143	51.0206	2e-07	-1.10138	down	8.8e-10	[E]	Amino acid transport and metabolism	Molecular Function: glutamate decarboxylase activity (GO:0004351);; Molecular Function: calmodulin binding (GO:0005516);; Biological Process: glutamate metabolic process (GO:0006536);; Molecular Function: pyridoxal phosphate binding (GO:0030170);;	K01580|0.0|vvi:100256481|hypothetical protein LOC100256481	[E]	Amino acid transport and metabolism	Pyridoxal-dependent decarboxylase conserved domain	Glutamate decarboxylase GN=GAD OS=Petunia hybrida (Petunia) PE=1 SV=1	PREDICTED: glutamate decarboxylase [Beta vulgaris subsp. vulgaris]
c17949.graph_c0	36.1481	31.313	27.9013	15.7352	14.2998	13.1045	2.3e-12	-1.34551	down	2.6e-15	--	--	--	--	--	--	--	--	PREDICTED: testis-specific Y-encoded-like protein 2 [Beta vulgaris subsp. vulgaris]
c20751.graph_c0	8.82283	13.8901	5.21709	20.0537	34.8438	32.9819	0.0025784	1.44481	up	7.46e-05	--	--	Cellular Component: extracellular region (GO:0005576);; Biological Process: plant-type cell wall organization (GO:0009664);; Cellular Component: membrane (GO:0016020);;	--	--	--	Rare lipoprotein A (RlpA)-like double-psi beta-barrel	Expansin-A1 (Precursor) GN=F10D13_18 OS=Arabidopsis thaliana (Mouse-ear cress) PE=2 SV=1	PREDICTED: expansin-A4-like [Sesamum indicum]
c12416.graph_c0	6.35905	6.68087	7.11575	5.19519	3.36965	2.77786	0.00635949	-1.02118	down	0.00025662	--	--	--	--	--	--	Plant invertase/pectin methylesterase inhibitor	Cell wall / vacuolar inhibitor of fructosidase 1 (Precursor) GN=T2J15.13 OS=Arabidopsis thaliana (Mouse-ear cress) PE=1 SV=1	PREDICTED: cell wall / vacuolar inhibitor of fructosidase 1-like [Beta vulgaris subsp. vulgaris]
c27836.graph_c0	0.414398	0.585331	0.174251	3.33048	6.03286	2.81804	0.000364056	3.17192	up	6.48e-06	--	--	--	--	--	--	--	--	PREDICTED: uncharacterized protein LOC104895545 [Beta vulgaris subsp. vulgaris]
c24553.graph_c0	1.08991	3.28424	1.39323	5.04549	9.92538	10.8346	0.00421845	1.95014	up	0.000149135	--	--	--	--	[W]	Extracellular structures	GGL domain	Guanine nucleotide-binding protein subunit gamma 3 (Precursor) GN=GG3 OS=Arabidopsis thaliana (Mouse-ear cress) PE=2 SV=1	PREDICTED: guanine nucleotide-binding protein subunit gamma 3 [Beta vulgaris subsp. vulgaris]
c34937.graph_c0	0.368215	1.49095	0.526426	3.69914	4.61917	3.24379	1.34e-06	2.08188	up	8.38e-09	--	--	--	--	--	--	--	--	PREDICTED: uncharacterized protein LOC104891875 [Beta vulgaris subsp. vulgaris]
c30612.graph_c0	68.5311	52.377	50.7801	24.1512	20.2699	15.7165	4.96e-09	-1.71125	down	1.39e-11	--	--	Molecular Function: inorganic anion exchanger activity (GO:0005452);; Biological Process: anion transport (GO:0006820);; Cellular Component: integral component of membrane (GO:0016021);;	--	[P]	Inorganic ion transport and metabolism	HCO3- transporter family	Boron transporter 4 GN=BOR4 OS=Arabidopsis thaliana (Mouse-ear cress) PE=2 SV=1	PREDICTED: boron transporter 4-like isoform X1 [Beta vulgaris subsp. vulgaris]
c18249.graph_c0	585.724	578.858	657.08	292.758	291.583	328.938	7.94e-17	-1.20415	down	4.25e-20	[Q]	Secondary metabolites biosynthesis, transport and catabolism	Molecular Function: copper ion binding (GO:0005507);; Cellular Component: mitochondrion (GO:0005739);; Biological Process: metabolic process (GO:0008152);; Molecular Function: hydrolase activity (GO:0016787);; Molecular Function: 5-oxopent-3-ene-1,2,5-tricarboxylate decarboxylase activity (GO:0018800);;	--	[R]	General function prediction only	Fumarylacetoacetate (FAA) hydrolase family	--	PREDICTED: acylpyruvase FAHD1, mitochondrial-like [Beta vulgaris subsp. vulgaris]
c30283.graph_c0	4.0715	5.95085	3.97023	8.55195	13.091	11.9058	0.000351957	1.05109	up	6.2e-06	--	--	Biological Process: transcription, DNA-templated (GO:0006351);; Molecular Function: sequence-specific DNA binding (GO:0043565);;	--	[K]	Transcription	Homeobox associated leucine zipper;; Homeobox domain	Homeobox-leucine zipper protein ATHB-13 GN=ATHB-13 OS=Arabidopsis thaliana (Mouse-ear cress) PE=2 SV=2	PREDICTED: homeobox-leucine zipper protein ATHB-13-like [Beta vulgaris subsp. vulgaris]
c41917.graph_c0	4.55849	6.31772	4.77728	16.6084	15.3797	10.4487	0.003746	1.24273	up	0.000124928	--	--	Biological Process: phosphatidylinositol biosynthetic process (GO:0006661);; Biological Process: embryo development ending in seed dormancy (GO:0009793);;	--	--	--	Probable lipid transfer;; Protease inhibitor/seed storage/LTP family	Putative lipid-transfer protein DIR1 (Precursor) GN=DIR1 OS=Arabidopsis thaliana (Mouse-ear cress) PE=1 SV=1	PREDICTED: uncharacterized protein LOC104904987 [Beta vulgaris subsp. vulgaris]
c37776.graph_c0	0.665054	0.920959	0.4277	1.98079	2.0721	2.61197	0.00117945	1.5242	up	2.79e-05	[IQR]	--	Molecular Function: oxidoreductase activity (GO:0016491);; Biological Process: oxidation-reduction process (GO:0055114);;	--	[R]	General function prediction only	short chain dehydrogenase;; Enoyl-(Acyl carrier protein) reductase;; KR domain	Short-chain dehydrogenase reductase 2a GN=T18N14.60 OS=Arabidopsis thaliana (Mouse-ear cress) PE=3 SV=1	PREDICTED: tropinone reductase-like 1 [Beta vulgaris subsp. vulgaris]
c43824.graph_c0	2.16823	1.63338	1.04848	4.40004	3.87852	4.27261	0.00840974	1.17126	up	0.000366881	--	--	--	--	--	--	Thaumatin family	Protein P21 OS=Glycine max (Soybean) PE=1 SV=1	PREDICTED: protein P21-like [Beta vulgaris subsp. vulgaris]
c42734.graph_c0	3.58252	2.45155	2.90056	12.0177	8.08479	9.40927	0.000240276	1.52528	up	3.88e-06	[P]	Inorganic ion transport and metabolism	--	--	[P]	Inorganic ion transport and metabolism	Cation efflux family	Metal tolerance protein 4 OS=Oryza sativa subsp. japonica (Rice) PE=2 SV=1	PREDICTED: metal tolerance protein 4-like [Beta vulgaris subsp. vulgaris]
c30876.graph_c0	0.203414	1.34082	0.439888	2.40552	4.37447	4.66183	0.000346403	2.32186	up	6.04e-06	--	--	Molecular Function: hydrolase activity (GO:0016787);;	--	--	--	--	GDSL esterase/lipase At1g71250 (Precursor) GN=At1g71250 OS=Arabidopsis thaliana (Mouse-ear cress) PE=2 SV=1	zinc finger protein, putative [Ricinus communis]
