# Supplementary material for: Salt-Responsive Transcriptome Profiling of Suaeda glauca via RNA Sequencing
Source: PLoS One. 2016 Mar 1;11(3):e0150504. doi: 10.1371/journal.pone.0150504 (PMC4773115; doi:10.1371/journal.pone.0150504)
Supplement: S3 Table — (XLSX) [file pone.0150504.s003.xlsx]

## Sheet: T01_T02_T03_vs_T04_T05_T06.Cog.
#ID	Class_Name	Numbers
J	Translation, ribosomal structure and biogenesis	0
A	RNA processing and modification	1
K	Transcription	7
L	Replication, recombination and repair	10
B	Chromatin structure and dynamics	1
D	Cell cycle control, cell division, chromosome partitioning	3
Y	Nuclear structure	0
V	Defense mechanisms	2
T	Signal transduction mechanisms	9
M	Cell wall/membrane/envelope biogenesis	3
N	Cell motility	0
Z	Cytoskeleton	1
W	Extracellular structures	0
U	Intracellular trafficking, secretion, and vesicular transport	1
O	Posttranslational modification, protein turnover, chaperones	4
C	Energy production and conversion	5
G	Carbohydrate transport and metabolism	10
E	Amino acid transport and metabolism	8
F	Nucleotide transport and metabolism	0
H	Coenzyme transport and metabolism	0
I	Lipid transport and metabolism	2
P	Inorganic ion transport and metabolism	7
Q	Secondary metabolites biosynthesis, transport and catabolism	10
R	General function prediction only	18
S	Function unknown	5

## Sheet: T01_T02_T03_vs_T04_T05_T06.Kog.
#ID	Class_Name	Numbers
J	Translation, ribosomal structure and biogenesis	1
A	RNA processing and modification	0
K	Transcription	7
L	Replication, recombination and repair	1
B	Chromatin structure and dynamics	1
D	Cell cycle control, cell division, chromosome partitioning	3
Y	Nuclear structure	0
V	Defense mechanisms	2
T	Signal transduction mechanisms	5
M	Cell wall/membrane/envelope biogenesis	1
N	Cell motility	0
Z	Cytoskeleton	1
W	Extracellular structures	1
U	Intracellular trafficking, secretion, and vesicular transport	2
O	Posttranslational modification, protein turnover, chaperones	5
C	Energy production and conversion	4
G	Carbohydrate transport and metabolism	4
E	Amino acid transport and metabolism	9
F	Nucleotide transport and metabolism	0
H	Coenzyme transport and metabolism	0
I	Lipid transport and metabolism	5
P	Inorganic ion transport and metabolism	8
Q	Secondary metabolites biosynthesis, transport and catabolism	12
R	General function prediction only	20
S	Function unknown	2
